# Supplementary material for: Regulation of Partial Endothelial-to-Mesenchymal Transition by circATXN1 in Ischemic Diseases
Source: Research Square preprint supplement (doi:10.21203/rs.3.rs-4997868/v1), 2024-09-30
Supplement: Supplementary file 1 [file 161fc542583db1c8f9d14f6f.docx]

Supplementary Table 2. List of antibodies used in Western blot, immunofluorescence and immunohistochemistry

|  | Company | Cat No | Use |
| --- | --- | --- | --- |
| β-actin | Proteintech | 66009-1-Ig | WB |
| CD31 | Proteintech | 11265-1-AP | WB |
| VE-cadherin | Proteintech | 83766-5-RR | WB |
| Fibronectin | Proteintech | 15613-1-AP | WB |
| FSP1 | Proteintech | 16105-1-AP | WB |
| QKI | Proteintech | 13169-1-AP | WB |
| α-Tubulin | Proteintech | 11224-1-AP | WB |
| SLUG | Proteintech | 12129-1-AP | WB |
| SNAIL | Abcam | ab216347 | WB |
| ZEB1 | Proteintech | 21544-1-AP | WB |
| ZEB2 | Proteintech | 67514-1-Ig | WB |
| TWIST | Abcam | ab50887 | WB |
| ALKBH5 | Proteintech | 67811-1-Ig | WB, RIP |
| AGO2 | Proteintech | 67934-1-Ig | WB |
| mCherry | Proteintech | 68088-1-Ig | WB |
| GAPDH | Proteintech | 60004-1-Ig | WB |
| LMNB | Proteintech | 12987-1-AP | WB |
| αSMA | Proteintech | 14395-1-AP | WB, IF |
| CD31 | Cell Signaling Technology | 3528 | IF |
| Vimentin | Proteintech | 22031-1-AP | IHC |

Supplementary Table 3. List of primers, probes and shRNA sequences

| Primers used in RT-qPCR assays | | |
| --- | --- | --- |
| Name | Sequence (5’-3’) | |
| Forward primer | Reverse primer |
| H circATXN1 | CGGGGAGCTAAAGAAGGTGG | CCTCCACGGTGACTGTTTCA |
| H β-actin | AGGCCAACCGCGAGAAGATG | GCCAGAGGCGTACAGGGATA |
| H circGNB1 | AGTGGGAAGAATCCAAATGC | GGCTTCTGGTCTGGTCTCC |
| H circSMAD2 | TGAAGATGGAGAAACAAGTGACC | TCCCACTGATCTATCGTATTTGG |
| H ATXN1 | TCCCTGATGGAAAGGAGCAT | TGGTCTGCAGCAGCACTAAG |
| H U6 | CGCTTCGGCAGCACATATAC | AGGGGCCATGCTAATCTTCT |
| H SLUG | CATCTTTGGGGCGAGTGAGT | ATGGCATGGGGGTCTGAAAG |
| H ALKBH5 | ATCCAAAAGCTGGTGGAGCA | GCAGCATATCCACTGAGCAC |
| M ATXN1 | GAATGGTTTGGGGTTCAGGC | CTCCGGATTCCTCTGCCAAC |
| M circATXN1 | ATGGTGCAGGCCCAGATCC | TAGGGGATCCAGGCCCTTCA |
| M β-actin | TGTACCCAGGCATTGCTGAC | AACGCAGCTCAGTAACAGTCC |
| M U6 | TGCTCGCTTCGGCAGCAC | CGCTTCACGAATTTGCGTGTC |

| Primers used in RT-PCR assays | | |
| --- | --- | --- |
| Name | Sequence (5’-3’) | |
| Forward primer | Reverse primer |
| H circATXN1 divergent | CGGGGAGCTAAAGAAGGTGG | CCTCCACGGTGACTGTTTCA |
| H circATXN1 convergent | CGTGAAGCCTCCCCTTCTAC | GCGTAGGTGATTGCTTGCTG |
| H ATXN1 | TCCTGCTTCAAGCTCATCCG | TTTCAAGACCATCCGTGCAG |
| H β-actin | CTAGGCACCAGGGTGTGA | TGGGGTGTTGAAGGTCTCA |
| M circATXN1 divergent | TAGGGGATCCAGGCCCTTCA | ATGGTGCAGGCCCAGATCC |
| M circATXN1 convergent | CCCAGCTGGAGGCTTATTCC | ATTGCACAACCACCTGGGAT |
| M ATXN1 | TCCATTTACACTTTACATATCCTGC | TCCTGCTTCAAGCTCATCCG |

| Biotin- or Cy3- labeled probes | |
| --- | --- |
| Name | Sequence (5’-3’) |
| antisense circATXN1 for RNA pull-down | AACAGCAGCTCTGGATGCTGGGCTCGGTGCTCC |
| sense circATXN1 for RNA pull-down | GGAGCACCGAGCCCAGCATCCAGAGCTGCTGTT |
| CircATXN1 FISH probe | CCGCCAACAGCAGCTCTGGATGCTGGGCTCGGTGCTCCCCGA |
| U6 FISH probe | GCTAATCTTCTCTGTATCGTTCCAATTTTAGTATATGTGCTGCCG |
| 18S FISH probe | CATGGCTTAATCTTTGAGAC |

| shRNA sequence | |
| --- | --- |
| Name | Sequence (5’-3’) |
| H circATXN1 sh | AGCCCAGCATCCAGAGCTGCT |
| H QKI sh | CCGAAGCTGGTTTAATCTATA |
| H ALKBH5 sh | CCTTACGTAGTTGCCCCTCC |
| H SLUG sh | ACGCCTCCAAAAAGCCAAAC |
| M circATXN1 sh | CCAGAATCCGGAGCTGCCACT |

| Primers used in MeRIP-qPCR | | |
| --- | --- | --- |
| Name | Sequence (5’-3’) | |
| Forward primer | Reverse primer |
| SLUG | TTCAACGCCTCCAAAAAGCC | GAGAGGCCATTGGGTAGCTG |

| Primers used in plasmid construction | | |
| --- | --- | --- |
| Name | Sequence (5’-3’) | |
| Forward primer | Reverse primer |
| SLUG | ATGCCGCGCTCCTTCCTGGT | TCAGTGTGCTACACAGCAGC |
| ALKBH5 WT | ATGGCGGCCGCCAGCGG | TCAGTGCCGCCGCATCTTCACCTTTC |
| ALKBH5 MUT | GTCTGCCGTGGACCCCATCCACATCTTCGAG | GGGTCCACGGCAGACACGATGCAGCCGCC |
| SLUG promoter | TGTGTCCAGTTCGCTGTAGT | GCACGCGGATCTGTGTAATG |

Supplementary Table 5. Clinical and biochemical characteristics of human samples.

|  | Healthy volunteers | Acute myocardial infarction patients | Lower limb  ischemia patients |
| --- | --- | --- | --- |
| Variables | Value (mean± SD) | | |
| Age (years) | 50±15 | 55±16 | 52±14 |
| Sex ratio (M/F) | 16/16 | 20/12 | 18/14 |
| Fasting glucose (mmol/L) | 5.04±1.03 | 4.85±1.13 | 5.12±1.05 |
| Serum triglyceride (mmol/L) | 1.37±0.87 | 1.59±0.93 | 1.28±0.96 |
| Serum total cholesterol (mmol/L) | 4.14±1.66 | 6.21±1.75 | 4.07±1.53 |
| Serum HDL (mmol/L) | 1.12±0.52 | 1.85±1.15 | 1.09±0.55 |
| Serum LDL (mmol/L) | 2.03±1.16 | 2.15±1.17 | 1.98±1.25 |
| Serum cTnI  (ng/mL) | 0.045±0.018 | 1.254±0.578 | 0.038±0.021 |
| Serum CK-MM  (U/L) | 61±15 | 341±117 | 15779±3581 |
