# Supplementary material for: Regulation of Partial Endothelial-to-Mesenchymal Transition by circATXN1 in Ischemic Diseases
Source: Research Square preprint supplement (doi:10.21203/rs.3.rs-4997868/v1), 2024-09-30
Supplement: Supplementary file 2 [file 64f18bc99624d5bfc499ff9d.xlsx]

## Sheet: S probe
Accession	Protein Name	Gene Symbol	Description	Exp. q-value: Combined	Sum PEP Score	Coverage [%]	# Peptides	# PSMs	# Unique Peptides	# AAs	MW [kDa]	calc. pI	Score Sequest HT	# Razor Peptides	# Protein Groups	Abundance: con	Found in Sample: con
P04264	Keratin, type II cytoskeletal 1	KRT1	Keratin, type II cytoskeletal 1 OS=Homo sapiens OX=9606 GN=KRT1 PE=1 SV=6	0	274.451	54	38	256	32	644	66	8.12	600.35	8	1	1.66723e+10	High
P35908	Keratin, type II cytoskeletal 2 epidermal	KRT2	Keratin, type II cytoskeletal 2 epidermal OS=Homo sapiens OX=9606 GN=KRT2 PE=1 SV=2	0	209.305	48	33	148	27	639	65.4	8	334.25	4	1	4.44742e+09	High
P13645	Keratin, type I cytoskeletal 10	KRT10	Keratin, type I cytoskeletal 10 OS=Homo sapiens OX=9606 GN=KRT10 PE=1 SV=6	0	198.121	41	28	163	25	584	58.8	5.21	397.62	0	1	7.72277e+09	High
Q86YZ3	Hornerin	HRNR	Hornerin OS=Homo sapiens OX=9606 GN=HRNR PE=1 SV=2	0	183.613	17	19	53	19	2850	282.2	10.04	153.78	0	1	2.64347e+08	High
P15924	Desmoplakin	DSP	Desmoplakin OS=Homo sapiens OX=9606 GN=DSP PE=1 SV=3	0	178.533	24	64	102	64	2871	331.6	6.81	230.75	0	1	4.53859e+08	High
P35527	Keratin, type I cytoskeletal 9	KRT9	Keratin, type I cytoskeletal 9 OS=Homo sapiens OX=9606 GN=KRT9 PE=1 SV=3	0	166.921	52	26	102	25	623	62	5.24	289.99	0	1	4.83059e+09	High
P08779	Keratin, type I cytoskeletal 16	KRT16	Keratin, type I cytoskeletal 16 OS=Homo sapiens OX=9606 GN=KRT16 PE=1 SV=4	0	160.163	62	30	98	16	473	51.2	5.05	249.78	2	1	9.66035e+08	High
P02538	Keratin, type II cytoskeletal 6A	KRT6A	Keratin, type II cytoskeletal 6A OS=Homo sapiens OX=9606 GN=KRT6A PE=1 SV=3	0	149.427	46	31	98	2	564	60	8	262.78	24	1	1.47027e+09	High
P04259	Keratin, type II cytoskeletal 6B	KRT6B	Keratin, type II cytoskeletal 6B OS=Homo sapiens OX=9606 GN=KRT6B PE=1 SV=5	0	148.536	46	31	97	2	564	60	8	259.23	4	1	2.27647e+08	High
P02533	Keratin, type I cytoskeletal 14	KRT14	Keratin, type I cytoskeletal 14 OS=Homo sapiens OX=9606 GN=KRT14 PE=1 SV=4	0	140.466	65	32	101	13	472	51.5	5.16	248.09	30	1	4.36376e+09	High
P48668	Keratin, type II cytoskeletal 6C	KRT6C	Keratin, type II cytoskeletal 6C OS=Homo sapiens OX=9606 GN=KRT6C PE=1 SV=3	0	137.515	46	31	99	2	564	60	8	255.48	0	1	1.82561e+06	High
P13647	Keratin, type II cytoskeletal 5	KRT5	Keratin, type II cytoskeletal 5 OS=Homo sapiens OX=9606 GN=KRT5 PE=1 SV=3	0	135.575	42	32	111	23	590	62.3	7.74	270.77	4	1	2.27107e+09	High
P02768	Albumin	ALB	Albumin OS=Homo sapiens OX=9606 GN=ALB PE=1 SV=2	0	88.854	35	20	51	20	609	69.3	6.28	114.98	0	1	6.18323e+08	High
Q04695	Keratin, type I cytoskeletal 17	KRT17	Keratin, type I cytoskeletal 17 OS=Homo sapiens OX=9606 GN=KRT17 PE=1 SV=2	0	86.114	51	27	71	14	432	48.1	5.02	179.3	2	1	3.58794e+08	High
Q5D862	Filaggrin-2	FLG2	Filaggrin-2 OS=Homo sapiens OX=9606 GN=FLG2 PE=1 SV=1	0	84.788	13	15	25	15	2391	247.9	8.31	59.07	0	1	6.06076e+07	High
P14923	Junction plakoglobin	JUP	Junction plakoglobin OS=Homo sapiens OX=9606 GN=JUP PE=1 SV=3	0	78.38	31	19	45	19	745	81.7	6.14	102.47	0	1	2.28629e+08	High
Q02413	Desmoglein-1	DSG1	Desmoglein-1 OS=Homo sapiens OX=9606 GN=DSG1 PE=1 SV=2	0	75.557	25	18	34	18	1049	113.7	5.03	73.49	0	1	1.03783e+08	High
P60709	Actin, cytoplasmic 1	ACTB	Actin, cytoplasmic 1 OS=Homo sapiens OX=9606 GN=ACTB PE=1 SV=1	0	71.903	46	12	30	6	375	41.7	5.48	71.52	8	1	3.07585e+08	High
P35579	Myosin-9	MYH9	Myosin-9 OS=Homo sapiens OX=9606 GN=MYH9 PE=1 SV=4	0	58.729	11	15	18	11	1960	226.4	5.6	30.19	4	1	2.24498e+07	High
Q9NZT1	Calmodulin-like protein 5	CALML5	Calmodulin-like protein 5 OS=Homo sapiens OX=9606 GN=CALML5 PE=1 SV=2	0	47.646	56	8	18	8	146	15.9	4.44	40.06	0	1	2.44295e+08	High
Q6UWP8	Suprabasin	SBSN	Suprabasin OS=Homo sapiens OX=9606 GN=SBSN PE=1 SV=2	0	41.077	29	7	14	7	590	60.5	7.01	45.45	0	1	4.01745e+07	High
P31944	Caspase-14	CASP14	Caspase-14 OS=Homo sapiens OX=9606 GN=CASP14 PE=1 SV=2	0	39.538	33	7	16	7	242	27.7	5.58	43.84	0	1	3.80906e+07	High
P31151	Protein S100-A7	S100A7	Protein S100-A7 OS=Homo sapiens OX=9606 GN=S100A7 PE=1 SV=4	0	34.883	36	6	30	6	101	11.5	6.77	57.19	0	1	2.20567e+08	High
P27482	Calmodulin-like protein 3	CALML3	Calmodulin-like protein 3 OS=Homo sapiens OX=9606 GN=CALML3 PE=1 SV=2	0	31.95	55	8	15	7	149	16.9	4.42	33.41	1	1	3.59617e+07	High
P16403	Histone H1.2	H1-2	Histone H1.2 OS=Homo sapiens OX=9606 GN=H1-2 PE=1 SV=2	0	31.862	25	8	27	2	213	21.4	10.93	71	6	1	4.38261e+08	High
Q08554	Desmocollin-1	DSC1	Desmocollin-1 OS=Homo sapiens OX=9606 GN=DSC1 PE=1 SV=2	0	31.736	10	7	17	7	894	99.9	5.43	44.9	0	1	6.01342e+07	High
Q01469	Fatty acid-binding protein 5	FABP5	Fatty acid-binding protein 5 OS=Homo sapiens OX=9606 GN=FABP5 PE=1 SV=3	0	31.295	67	8	14	8	135	15.2	7.01	20.09	0	1	1.10373e+08	High
P07355	Annexin A2	ANXA2	Annexin A2 OS=Homo sapiens OX=9606 GN=ANXA2 PE=1 SV=2	0	31.079	32	10	17	10	339	38.6	7.75	42.77	0	1	7.01035e+07	High
P10412	Histone H1.4	H1-4	Histone H1.4 OS=Homo sapiens OX=9606 GN=H1-4 PE=1 SV=2	0	30.728	27	7	26	1	219	21.9	11.03	68.03	0	1	62540096	High
Q7Z794	Keratin, type II cytoskeletal 1b	KRT77	Keratin, type II cytoskeletal 1b OS=Homo sapiens OX=9606 GN=KRT77 PE=1 SV=3	0	30.597	11	7	25	5	578	61.9	5.99	69.9	0	1	2.58124e+08	High
P63267	Actin, gamma-enteric smooth muscle	ACTG2	Actin, gamma-enteric smooth muscle OS=Homo sapiens OX=9606 GN=ACTG2 PE=1 SV=1	0	29.697	22	7	15	1	376	41.9	5.48	30.68	0	1	2.3052e+06	High
Q6KB66	Keratin, type II cytoskeletal 80	KRT80	Keratin, type II cytoskeletal 80 OS=Homo sapiens OX=9606 GN=KRT80 PE=1 SV=2	0	29.249	32	13	18	13	452	50.5	5.67	37.49	0	1	4.40725e+07	High
P68871	Hemoglobin subunit beta	HBB	Hemoglobin subunit beta OS=Homo sapiens OX=9606 GN=HBB PE=1 SV=2	0	28.987	45	5	14	5	147	16	7.28	32.07	0	1	8.22012e+07	High
Q8N1N4	Keratin, type II cytoskeletal 78	KRT78	Keratin, type II cytoskeletal 78 OS=Homo sapiens OX=9606 GN=KRT78 PE=1 SV=2	0	28.486	19	9	15	7	520	56.8	6.02	38.47	1	1	4.05716e+07	High
P0DMV9	Heat shock 70 kDa protein 1B	HSPA1B	Heat shock 70 kDa protein 1B OS=Homo sapiens OX=9606 GN=HSPA1B PE=1 SV=1	0	27.461	17	9	11	8	641	70	5.66	22.66	0	1	1.6876e+07	High
P02545	Prelamin-A/C	LMNA	Prelamin-A/C OS=Homo sapiens OX=9606 GN=LMNA PE=1 SV=1	0	27.239	21	12	14	12	664	74.1	7.02	30.55	0	1	3.72587e+07	High
P04406	Glyceraldehyde-3-phosphate dehydrogenase	GAPDH	Glyceraldehyde-3-phosphate dehydrogenase OS=Homo sapiens OX=9606 GN=GAPDH PE=1 SV=3	0	26.818	26	6	15	6	335	36	8.46	35	0	1	3.81897e+08	High
Q8WVV4	Protein POF1B	POF1B	Protein POF1B OS=Homo sapiens OX=9606 GN=POF1B PE=1 SV=3	0	26.715	20	9	15	9	589	68	6.32	32.93	0	1	2.46743e+07	High
P01040	Cystatin-A	CSTA	Cystatin-A OS=Homo sapiens OX=9606 GN=CSTA PE=1 SV=1	0	26.437	78	5	7	5	98	11	5.5	17.75	0	1	2.40681e+07	High
P11142	Heat shock cognate 71 kDa protein	HSPA8	Heat shock cognate 71 kDa protein OS=Homo sapiens OX=9606 GN=HSPA8 PE=1 SV=1	0	26.332	19	10	12	8	646	70.9	5.52	27.86	2	1	2.71042e+07	High
P08727	Keratin, type I cytoskeletal 19	KRT19	Keratin, type I cytoskeletal 19 OS=Homo sapiens OX=9606 GN=KRT19 PE=1 SV=4	0	25.61	17	8	24	1	400	44.1	5.14	58.14	0	1	8261470	High
P06702	Protein S100-A9	S100A9	Protein S100-A9 OS=Homo sapiens OX=9606 GN=S100A9 PE=1 SV=1	0	25.112	25	2	15	2	114	13.2	6.13	43.56	0	1	3.53099e+08	High
P14735	Insulin-degrading enzyme	IDE	Insulin-degrading enzyme OS=Homo sapiens OX=9606 GN=IDE PE=1 SV=4	0	24.614	14	12	17	12	1019	117.9	6.61	36.1	0	1	3.99128e+07	High
P19012	Keratin, type I cytoskeletal 15	KRT15	Keratin, type I cytoskeletal 15 OS=Homo sapiens OX=9606 GN=KRT15 PE=1 SV=3	0	24.315	16	9	29	3	456	49.2	4.77	71.23	0	1	1.13356e+07	High
P62701	40S ribosomal protein S4, X isoform	RPS4X	40S ribosomal protein S4, X isoform OS=Homo sapiens OX=9606 GN=RPS4X PE=1 SV=2	0	24.102	30	8	14	8	263	29.6	10.15	26.05	0	1	3.99113e+07	High
P31947	14-3-3 protein sigma	SFN	14-3-3 protein sigma OS=Homo sapiens OX=9606 GN=SFN PE=1 SV=1	0	23.165	22	6	10	6	248	27.8	4.74	24.81	0	1	5.4386e+07	High
P29508	Serpin B3	SERPINB3	Serpin B3 OS=Homo sapiens OX=9606 GN=SERPINB3 PE=1 SV=2	0	22.999	20	8	16	4	390	44.5	6.81	37.28	5	1	6.11472e+07	High
P48594	Serpin B4	SERPINB4	Serpin B4 OS=Homo sapiens OX=9606 GN=SERPINB4 PE=1 SV=2	0	21.844	19	6	11	2	390	44.8	6.21	30.72	0	1	2.84763e+06	High
P04792	Heat shock protein beta-1	HSPB1	Heat shock protein beta-1 OS=Homo sapiens OX=9606 GN=HSPB1 PE=1 SV=2	0	21.619	26	4	7	4	205	22.8	6.4	23.09	0	1	37705887	High
P36952	Serpin B5	SERPINB5	Serpin B5 OS=Homo sapiens OX=9606 GN=SERPINB5 PE=1 SV=2	0	21.186	17	4	6	4	375	42.1	6.05	14.06	0	1	9.69176e+06	High
P22626	Heterogeneous nuclear ribonucleoproteins A2/B1	HNRNPA2B1	Heterogeneous nuclear ribonucleoproteins A2/B1 OS=Homo sapiens OX=9606 GN=HNRNPA2B1 PE=1 SV=2	0	20.485	23	7	10	6	353	37.4	8.95	24.28	1	1	3.32006e+07	High
Q08188	Protein-glutamine gamma-glutamyltransferase E	TGM3	Protein-glutamine gamma-glutamyltransferase E OS=Homo sapiens OX=9606 GN=TGM3 PE=1 SV=4	0	19.198	10	6	12	6	693	76.6	5.86	18.44	0	1	2.54453e+07	High
P47756	F-actin-capping protein subunit beta	CAPZB	F-actin-capping protein subunit beta OS=Homo sapiens OX=9606 GN=CAPZB PE=1 SV=5	0	19.008	31	7	8	7	272	30.6	6	17.5	0	1	1.50188e+07	High
Q9C075	Keratin, type I cytoskeletal 23	KRT23	Keratin, type I cytoskeletal 23 OS=Homo sapiens OX=9606 GN=KRT23 PE=1 SV=2	0	18.801	17	6	10	5	422	48.1	6.54	24.36	0	1	6.70821e+06	High
P0DPH8	Tubulin alpha-3D chain	TUBA3D	Tubulin alpha-3D chain OS=Homo sapiens OX=9606 GN=TUBA3D PE=1 SV=1	0	18.362	22	7	9	2	450	49.9	5.1	12.44	5	1	2.09269e+07	High
P14618	Pyruvate kinase PKM	PKM	Pyruvate kinase PKM OS=Homo sapiens OX=9606 GN=PKM PE=1 SV=4	0	18.096	13	6	7	6	531	57.9	7.84	14.49	0	1	1.48074e+07	High
P06733	Alpha-enolase	ENO1	Alpha-enolase OS=Homo sapiens OX=9606 GN=ENO1 PE=1 SV=2	0	18.033	16	5	6	5	434	47.1	7.39	15.92	0	1	3.73607e+07	High
P20930	Filaggrin	FLG	Filaggrin OS=Homo sapiens OX=9606 GN=FLG PE=1 SV=3	0	17.934	5	8	11	8	4061	434.9	9.25	22.96	0	1	2.87133e+07	High
P01834	Immunoglobulin kappa constant	IGKC	Immunoglobulin kappa constant OS=Homo sapiens OX=9606 GN=IGKC PE=1 SV=2	0	17.887	51	3	5	3	107	11.8	6.52	10.27	0	1	1.81436e+07	High
P0DP25	Calmodulin-3	CALM3	Calmodulin-3 OS=Homo sapiens OX=9606 GN=CALM3 PE=1 SV=1	0	17.35	39	5	8	4	149	16.8	4.22	20.15	0	1	1.19896e+07	High
P62241	40S ribosomal protein S8	RPS8	40S ribosomal protein S8 OS=Homo sapiens OX=9606 GN=RPS8 PE=1 SV=2	0	17.138	29	5	5	5	208	24.2	10.32	14.28	0	1	5.36449e+07	High
P62826	GTP-binding nuclear protein Ran	RAN	GTP-binding nuclear protein Ran OS=Homo sapiens OX=9606 GN=RAN PE=1 SV=3	0	17.12	31	7	13	7	216	24.4	7.49	34.01	0	1	7.49526e+07	High
P81605	Dermcidin	DCD	Dermcidin OS=Homo sapiens OX=9606 GN=DCD PE=1 SV=2	0	16.972	30	4	13	4	110	11.3	6.54	34.35	0	1	2.57562e+08	High
O43707	Alpha-actinin-4	ACTN4	Alpha-actinin-4 OS=Homo sapiens OX=9606 GN=ACTN4 PE=1 SV=2	0	16.683	11	7	8	7	911	104.8	5.44	17.55	0	1	5.66316e+06	High
Q5T749	Keratinocyte proline-rich protein	KPRP	Keratinocyte proline-rich protein OS=Homo sapiens OX=9606 GN=KPRP PE=1 SV=1	0	16.093	12	6	13	6	579	64.1	8.27	33.21	0	1	7.19261e+07	High
Q07020	60S ribosomal protein L18	RPL18	60S ribosomal protein L18 OS=Homo sapiens OX=9606 GN=RPL18 PE=1 SV=2	0	15.916	27	4	8	4	188	21.6	11.72	16.35	0	1	4.78181e+07	High
P62424	60S ribosomal protein L7a	RPL7A	60S ribosomal protein L7a OS=Homo sapiens OX=9606 GN=RPL7A PE=1 SV=2	0	15.633	17	4	12	4	266	30	10.61	29.16	0	1	4.46896e+07	High
P62753	40S ribosomal protein S6	RPS6	40S ribosomal protein S6 OS=Homo sapiens OX=9606 GN=RPS6 PE=1 SV=1	0	15.549	26	6	6	6	249	28.7	10.84	15.01	0	1	5.10948e+07	High
P22087	rRNA 2'-O-methyltransferase fibrillarin	FBL	rRNA 2'-O-methyltransferase fibrillarin OS=Homo sapiens OX=9606 GN=FBL PE=1 SV=2	0	15.516	16	4	7	4	321	33.8	10.18	17.04	0	1	1.74611e+07	High
P05089	Arginase-1	ARG1	Arginase-1 OS=Homo sapiens OX=9606 GN=ARG1 PE=1 SV=2	0	15.35	20	6	13	6	322	34.7	7.21	26.99	0	1	4.40319e+07	High
P60174	Triosephosphate isomerase	TPI1	Triosephosphate isomerase OS=Homo sapiens OX=9606 GN=TPI1 PE=1 SV=4	0	15.348	26	5	7	5	249	26.7	6.9	18.26	0	1	3.18985e+07	High
Q07021	Complement component 1 Q subcomponent-binding protein, mitochondrial	C1QBP	Complement component 1 Q subcomponent-binding protein, mitochondrial OS=Homo sapiens OX=9606 GN=C1QBP PE=1 SV=1	0	15.305	17	4	7	4	282	31.3	4.84	15.23	0	1	1.21042e+07	High
Q13867	Bleomycin hydrolase	BLMH	Bleomycin hydrolase OS=Homo sapiens OX=9606 GN=BLMH PE=1 SV=1	0	15.252	15	5	7	5	455	52.5	6.27	10.79	0	1	1.40607e+07	High
P11021	Endoplasmic reticulum chaperone BiP	HSPA5	Endoplasmic reticulum chaperone BiP OS=Homo sapiens OX=9606 GN=HSPA5 PE=1 SV=2	0	15.06	9	4	5	2	654	72.3	5.16	13.82	0	1	3.94786e+06	High
Q14CN4	Keratin, type II cytoskeletal 72	KRT72	Keratin, type II cytoskeletal 72 OS=Homo sapiens OX=9606 GN=KRT72 PE=1 SV=2	0	14.946	6	4	9	1	511	55.8	6.89	23.22	0	1	2.7484e+06	High
P53597	Succinate--CoA ligase [ADP/GDP-forming] subunit alpha, mitochondrial	SUCLG1	Succinate--CoA ligase [ADP/GDP-forming] subunit alpha, mitochondrial OS=Homo sapiens OX=9606 GN=SUCLG1 PE=1 SV=4	0	14.93	8	2	8	2	346	36.2	8.79	24.34	0	1	8.26136e+07	High
P13639	Elongation factor 2	EEF2	Elongation factor 2 OS=Homo sapiens OX=9606 GN=EEF2 PE=1 SV=4	0	14.826	9	7	11	7	858	95.3	6.83	19.26	0	1	1.67736e+07	High
P15880	40S ribosomal protein S2	RPS2	40S ribosomal protein S2 OS=Homo sapiens OX=9606 GN=RPS2 PE=1 SV=2	0	14.485	15	4	7	4	293	31.3	10.24	14.16	0	1	2.98573e+07	High
O15144	Actin-related protein 2/3 complex subunit 2	ARPC2	Actin-related protein 2/3 complex subunit 2 OS=Homo sapiens OX=9606 GN=ARPC2 PE=1 SV=1	0	14.032	18	5	11	5	300	34.3	7.36	16.94	0	1	1.38064e+07	High
P08670	Vimentin	VIM	Vimentin OS=Homo sapiens OX=9606 GN=VIM PE=1 SV=4	0	13.935	14	5	5	5	466	53.6	5.12	12.87	0	1	1.61798e+07	High
P04040	Catalase	CAT	Catalase OS=Homo sapiens OX=9606 GN=CAT PE=1 SV=3	0	13.592	14	6	9	6	527	59.7	7.39	15.4	0	1	1.3267e+07	High
Q13835	Plakophilin-1	PKP1	Plakophilin-1 OS=Homo sapiens OX=9606 GN=PKP1 PE=1 SV=2	0	13.473	8	5	7	5	747	82.8	9.13	19.62	0	1	1.57864e+07	High
P05109	Protein S100-A8	S100A8	Protein S100-A8 OS=Homo sapiens OX=9606 GN=S100A8 PE=1 SV=1	0	13.377	24	2	9	2	93	10.8	7.03	15.75	0	1	3.26915e+08	High
P02787	Serotransferrin	TF	Serotransferrin OS=Homo sapiens OX=9606 GN=TF PE=1 SV=4	0	13.048	8	5	7	5	698	77	7.12	16.93	0	1	8.85885e+06	High
P69905	Hemoglobin subunit alpha	HBA2	Hemoglobin subunit alpha OS=Homo sapiens OX=9606 GN=HBA2 PE=1 SV=2	0	12.847	25	3	6	3	142	15.2	8.68	14.86	0	1	5.58311e+07	High
P35580	Myosin-10	MYH10	Myosin-10 OS=Homo sapiens OX=9606 GN=MYH10 PE=1 SV=3	0	12.633	3	5	5	1	1976	228.9	5.54	7.67	0	1	1425756	High
P68366	Tubulin alpha-4A chain	TUBA4A	Tubulin alpha-4A chain OS=Homo sapiens OX=9606 GN=TUBA4A PE=1 SV=1	0	12.544	18	6	8	1	448	49.9	5.06	11.86	0	1	1.19603e+06	High
P62805	Histone H4	H4C16	Histone H4 OS=Homo sapiens OX=9606 GN=H4C16 PE=1 SV=2	0	12.52	39	4	7	4	103	11.4	11.36	16.08	0	1	3.81575e+07	High
Q9BQ50	Three prime repair exonuclease 2	TREX2	Three prime repair exonuclease 2 OS=Homo sapiens OX=9606 GN=TREX2 PE=1 SV=2	0	12.398	19	3	5	3	236	25.9	6.06	12.28	0	1	2.63111e+07	High
Q09666	Neuroblast differentiation-associated protein AHNAK	AHNAK	Neuroblast differentiation-associated protein AHNAK OS=Homo sapiens OX=9606 GN=AHNAK PE=1 SV=2	0	12.386	3	4	5	4	5890	628.7	6.15	9.6	0	1	3.73868e+06	High
P07900	Heat shock protein HSP 90-alpha	HSP90AA1	Heat shock protein HSP 90-alpha OS=Homo sapiens OX=9606 GN=HSP90AA1 PE=1 SV=5	0	12.286	8	5	6	3	732	84.6	5.02	14.48	0	1	4.41081e+07	High
P01857	Immunoglobulin heavy constant gamma 1	IGHG1	Immunoglobulin heavy constant gamma 1 OS=Homo sapiens OX=9606 GN=IGHG1 PE=1 SV=1	0	12.264	14	4	9	2	330	36.1	8.19	16.87	3	1	4.29983e+07	High
P51149	Ras-related protein Rab-7a	RAB7A	Ras-related protein Rab-7a OS=Homo sapiens OX=9606 GN=RAB7A PE=1 SV=1	0	12.264	27	5	5	5	207	23.5	6.7	10.21	0	1	6.2338e+06	High
P23396	40S ribosomal protein S3	RPS3	40S ribosomal protein S3 OS=Homo sapiens OX=9606 GN=RPS3 PE=1 SV=2	0	12.096	22	5	9	5	243	26.7	9.66	19.41	0	1	2.3752e+07	High
P01859	Immunoglobulin heavy constant gamma 2	IGHG2	Immunoglobulin heavy constant gamma 2 OS=Homo sapiens OX=9606 GN=IGHG2 PE=1 SV=2	0	12.01	14	4	9	2	326	35.9	7.59	15.92	0	1	9.03534e+06	High
P62906	60S ribosomal protein L10a	RPL10A	60S ribosomal protein L10a OS=Homo sapiens OX=9606 GN=RPL10A PE=1 SV=2	0	11.964	23	4	6	4	217	24.8	9.94	13.09	0	1	1.52382e+07	High
P47929	Galectin-7	LGALS7B	Galectin-7 OS=Homo sapiens OX=9606 GN=LGALS7B PE=1 SV=2	0	11.896	27	3	4	3	136	15.1	7.62	11.01	0	1	83768078	High
P62987	Ubiquitin-60S ribosomal protein L40	UBA52	Ubiquitin-60S ribosomal protein L40 OS=Homo sapiens OX=9606 GN=UBA52 PE=1 SV=2	0	11.631	27	3	6	3	128	14.7	9.83	10.15	0	1	2.84021e+07	High
P15927	Replication protein A 32 kDa subunit	RPA2	Replication protein A 32 kDa subunit OS=Homo sapiens OX=9606 GN=RPA2 PE=1 SV=1	0	11.557	13	3	13	3	270	29.2	6.15	27.32	0	1	4.03114e+07	High
P35321	Cornifin-A	SPRR1A	Cornifin-A OS=Homo sapiens OX=9606 GN=SPRR1A PE=1 SV=2	0	11.388	44	3	4	1	89	9.9	8.48	11.5	2	1	7.77294e+07	High
Q06830	Peroxiredoxin-1	PRDX1	Peroxiredoxin-1 OS=Homo sapiens OX=9606 GN=PRDX1 PE=1 SV=1	0	11.205	28	5	8	4	199	22.1	8.13	17.41	1	1	3.20452e+07	High
P52907	F-actin-capping protein subunit alpha-1	CAPZA1	F-actin-capping protein subunit alpha-1 OS=Homo sapiens OX=9606 GN=CAPZA1 PE=1 SV=3	0	11.194	19	4	5	3	286	32.9	5.69	9.51	1	1	1.9002e+07	High
P01009	Alpha-1-antitrypsin	SERPINA1	Alpha-1-antitrypsin OS=Homo sapiens OX=9606 GN=SERPINA1 PE=1 SV=3	0	11.132	7	2	3	2	418	46.7	5.59	2.56	0	1	3.29474e+06	High
P08238	Heat shock protein HSP 90-beta	HSP90AB1	Heat shock protein HSP 90-beta OS=Homo sapiens OX=9606 GN=HSP90AB1 PE=1 SV=4	0	10.859	8	5	6	3	724	83.2	5.03	13.03	2	1	9.59881e+06	High
P29692	Elongation factor 1-delta	EEF1D	Elongation factor 1-delta OS=Homo sapiens OX=9606 GN=EEF1D PE=1 SV=5	0	10.851	21	4	6	4	281	31.1	5.01	11.57	0	1	9.31324e+06	High
P07339	Cathepsin D	CTSD	Cathepsin D OS=Homo sapiens OX=9606 GN=CTSD PE=1 SV=1	0	10.788	12	4	6	4	412	44.5	6.54	9.63	0	1	1.17618e+07	High
Q01130	Serine/arginine-rich splicing factor 2	SRSF2	Serine/arginine-rich splicing factor 2 OS=Homo sapiens OX=9606 GN=SRSF2 PE=1 SV=4	0	10.785	24	4	4	4	221	25.5	11.85	11.08	0	1	18501660	High
P07476	Involucrin	IVL	Involucrin OS=Homo sapiens OX=9606 GN=IVL PE=1 SV=2	0	10.473	9	4	5	4	585	68.4	4.61	9.49	0	1	1.83491e+07	High
P22735	Protein-glutamine gamma-glutamyltransferase K	TGM1	Protein-glutamine gamma-glutamyltransferase K OS=Homo sapiens OX=9606 GN=TGM1 PE=1 SV=4	0	10.43	5	4	8	4	817	89.7	6.04	17.54	0	1	18117086	High
P27635	60S ribosomal protein L10	RPL10	60S ribosomal protein L10 OS=Homo sapiens OX=9606 GN=RPL10 PE=1 SV=5	0	10.376	12	2	6	2	214	24.6	10.08	14.62	0	1	1.53785e+07	High
P00558	Phosphoglycerate kinase 1	PGK1	Phosphoglycerate kinase 1 OS=Homo sapiens OX=9606 GN=PGK1 PE=1 SV=3	0	10.257	12	4	4	4	417	44.6	8.1	9.72	0	1	6.99881e+06	High
O75342	Arachidonate 12-lipoxygenase, 12R-type	ALOX12B	Arachidonate 12-lipoxygenase, 12R-type OS=Homo sapiens OX=9606 GN=ALOX12B PE=1 SV=1	0	10.151	7	4	7	4	701	80.3	7.64	10.25	0	1	7.04949e+06	High
Q02878	60S ribosomal protein L6	RPL6	60S ribosomal protein L6 OS=Homo sapiens OX=9606 GN=RPL6 PE=1 SV=3	0	10.122	17	5	7	5	288	32.7	10.58	16.02	0	1	1.90613e+07	High
O60716	Catenin delta-1	CTNND1	Catenin delta-1 OS=Homo sapiens OX=9606 GN=CTNND1 PE=1 SV=1	0	9.986	4	4	5	4	968	108.1	6.23	10.96	0	1	2.42847e+07	High
P25311	Zinc-alpha-2-glycoprotein	AZGP1	Zinc-alpha-2-glycoprotein OS=Homo sapiens OX=9606 GN=AZGP1 PE=1 SV=2	0	9.786	9	2	5	2	298	34.2	6.05	9.94	0	1	1.42734e+07	High
P07477	Serine protease 1	PRSS1	Serine protease 1 OS=Homo sapiens OX=9606 GN=PRSS1 PE=1 SV=1	0	9.776	15	3	15	3	247	26.5	6.51	24.09	0	1	1.72022e+09	High
P60660	Myosin light polypeptide 6	MYL6	Myosin light polypeptide 6 OS=Homo sapiens OX=9606 GN=MYL6 PE=1 SV=2	0	9.705	30	4	5	4	151	16.9	4.65	12.6	0	1	10391085	High
P63104	14-3-3 protein zeta/delta	YWHAZ	14-3-3 protein zeta/delta OS=Homo sapiens OX=9606 GN=YWHAZ PE=1 SV=1	0	9.628	16	3	3	3	245	27.7	4.79	5.46	0	1	1.54918e+07	High
Q13885	Tubulin beta-2A chain	TUBB2A	Tubulin beta-2A chain OS=Homo sapiens OX=9606 GN=TUBB2A PE=1 SV=1	0	9.461	7	3	7	3	445	49.9	4.89	14.91	0	1	1.19158e+07	High
P18124	60S ribosomal protein L7	RPL7	60S ribosomal protein L7 OS=Homo sapiens OX=9606 GN=RPL7 PE=1 SV=1	0	9.358	13	3	4	3	248	29.2	10.65	9.83	0	1	1.18787e+07	High
P84098	60S ribosomal protein L19	RPL19	60S ribosomal protein L19 OS=Homo sapiens OX=9606 GN=RPL19 PE=1 SV=1	0	9.281	17	3	6	3	196	23.5	11.47	11.94	0	1	28212210	High
P18206	Vinculin	VCL	Vinculin OS=Homo sapiens OX=9606 GN=VCL PE=1 SV=4	0	9.176	5	4	4	4	1134	123.7	5.66	6.23	0	1	9.02939e+06	High
P07910	Heterogeneous nuclear ribonucleoproteins C1/C2	HNRNPC	Heterogeneous nuclear ribonucleoproteins C1/C2 OS=Homo sapiens OX=9606 GN=HNRNPC PE=1 SV=4	0	9.111	12	4	4	4	306	33.7	5.08	5.79	0	1	1.21721e+07	High
Q99623	Prohibitin-2	PHB2	Prohibitin-2 OS=Homo sapiens OX=9606 GN=PHB2 PE=1 SV=2	0	8.999	14	4	4	4	299	33.3	9.83	10.31	0	1	1.43875e+07	High
P00338	L-lactate dehydrogenase A chain	LDHA	L-lactate dehydrogenase A chain OS=Homo sapiens OX=9606 GN=LDHA PE=1 SV=2	0	8.99	13	4	4	3	332	36.7	8.27	9.29	1	1	19659276	High
P08865	40S ribosomal protein SA	RPSA	40S ribosomal protein SA OS=Homo sapiens OX=9606 GN=RPSA PE=1 SV=4	0	8.985	14	3	3	3	295	32.8	4.87	9.05	0	1	4.15643e+06	High
P09493	Tropomyosin alpha-1 chain	TPM1	Tropomyosin alpha-1 chain OS=Homo sapiens OX=9606 GN=TPM1 PE=1 SV=2	0	8.741	16	4	5	3	284	32.7	4.74	9.11	1	1	16144208	High
P10619	Lysosomal protective protein	CTSA	Lysosomal protective protein OS=Homo sapiens OX=9606 GN=CTSA PE=1 SV=2	0	8.726	5	2	3	2	480	54.4	6.61	7.41	0	1	3.1291e+06	High
P18669	Phosphoglycerate mutase 1	PGAM1	Phosphoglycerate mutase 1 OS=Homo sapiens OX=9606 GN=PGAM1 PE=1 SV=2	0	8.577	11	2	4	2	254	28.8	7.18	8.04	0	1	6.29756e+06	High
Q07955	Serine/arginine-rich splicing factor 1	SRSF1	Serine/arginine-rich splicing factor 1 OS=Homo sapiens OX=9606 GN=SRSF1 PE=1 SV=2	0	8.547	17	4	5	4	248	27.7	10.36	12.29	0	1	1.21183e+07	High
P02788	Lactotransferrin	LTF	Lactotransferrin OS=Homo sapiens OX=9606 GN=LTF PE=1 SV=6	0	8.515	7	4	6	4	710	78.1	8.12	10.96	0	1	6.75611e+06	High
Q02978	Mitochondrial 2-oxoglutarate/malate carrier protein	SLC25A11	Mitochondrial 2-oxoglutarate/malate carrier protein OS=Homo sapiens OX=9606 GN=SLC25A11 PE=1 SV=3	0	8.472	11	2	3	2	314	34	9.91	8.76	0	1	3.01715e+06	High
Q9HCY8	Protein S100-A14	S100A14	Protein S100-A14 OS=Homo sapiens OX=9606 GN=S100A14 PE=1 SV=1	0	8.347	25	2	4	2	104	11.7	5.24	12.55	0	1	9.00413e+06	High
Q9Y3R4	Sialidase-2	NEU2	Sialidase-2 OS=Homo sapiens OX=9606 GN=NEU2 PE=1 SV=2	0	8.289	11	3	3	3	380	42.2	6.87	4.15	0	1	2.68084e+06	High
P61019	Ras-related protein Rab-2A	RAB2A	Ras-related protein Rab-2A OS=Homo sapiens OX=9606 GN=RAB2A PE=1 SV=1	0	8.076	19	3	4	3	212	23.5	6.54	8.94	0	1	2.08092e+06	High
P07195	L-lactate dehydrogenase B chain	LDHB	L-lactate dehydrogenase B chain OS=Homo sapiens OX=9606 GN=LDHB PE=1 SV=2	0	7.984	11	3	3	2	334	36.6	6.05	4.99	0	1	1.57163e+06	High
Q9BQA1	Methylosome protein 50	WDR77	Methylosome protein 50 OS=Homo sapiens OX=9606 GN=WDR77 PE=1 SV=1	0	7.944	16	3	3	3	342	36.7	5.17	7.64	0	1	9.91727e+06	High
P04075	Fructose-bisphosphate aldolase A	ALDOA	Fructose-bisphosphate aldolase A OS=Homo sapiens OX=9606 GN=ALDOA PE=1 SV=2	0	7.931	15	4	5	4	364	39.4	8.09	11.31	0	1	8.68206e+06	High
P27694	Replication protein A 70 kDa DNA-binding subunit	RPA1	Replication protein A 70 kDa DNA-binding subunit OS=Homo sapiens OX=9606 GN=RPA1 PE=1 SV=2	0	7.898	6	3	4	3	616	68.1	7.21	7.74	0	1	1.36105e+06	High
P22531	Small proline-rich protein 2E	SPRR2E	Small proline-rich protein 2E OS=Homo sapiens OX=9606 GN=SPRR2E PE=2 SV=2	0	7.787	61	3	8	1	72	7.9	8.31	19.47	0	1	3.21238e+06	High
P29373	Cellular retinoic acid-binding protein 2	CRABP2	Cellular retinoic acid-binding protein 2 OS=Homo sapiens OX=9606 GN=CRABP2 PE=1 SV=2	0	7.733	28	3	3	3	138	15.7	5.4	7.21	0	1	4.69633e+06	High
P62249	40S ribosomal protein S16	RPS16	40S ribosomal protein S16 OS=Homo sapiens OX=9606 GN=RPS16 PE=1 SV=2	0	7.646	21	3	4	3	146	16.4	10.21	6.09	0	1	2.07396e+06	High
P22532	Small proline-rich protein 2D	SPRR2D	Small proline-rich protein 2D OS=Homo sapiens OX=9606 GN=SPRR2D PE=2 SV=2	0	7.554	49	3	8	1	72	7.9	8.37	20	2	1	59271921	High
P32969	60S ribosomal protein L9	RPL9P9	60S ribosomal protein L9 OS=Homo sapiens OX=9606 GN=RPL9P9 PE=1 SV=1	0	7.38	18	3	4	3	192	21.9	9.95	8.88	0	1	6.93868e+06	High
Q6ZVX7	F-box only protein 50	NCCRP1	F-box only protein 50 OS=Homo sapiens OX=9606 GN=NCCRP1 PE=1 SV=1	0	7.281	4	1	5	1	275	30.8	6.62	12.61	0	1	14658522	High
Q6E0U4	Dermokine	DMKN	Dermokine OS=Homo sapiens OX=9606 GN=DMKN PE=1 SV=3	0	7.243	4	1	2	1	476	47.1	7.28	2.05	0	1	4.88643e+06	High
P63244	Receptor of activated protein C kinase 1	RACK1	Receptor of activated protein C kinase 1 OS=Homo sapiens OX=9606 GN=RACK1 PE=1 SV=3	0	7.099	11	3	3	3	317	35.1	7.69	7.24	0	1	9.59115e+06	High
P04083	Annexin A1	ANXA1	Annexin A1 OS=Homo sapiens OX=9606 GN=ANXA1 PE=1 SV=2	0	7.045	12	3	3	3	346	38.7	7.02	8.12	0	1	3.4414e+06	High
Q96P63	Serpin B12	SERPINB12	Serpin B12 OS=Homo sapiens OX=9606 GN=SERPINB12 PE=1 SV=1	0	7.028	6	2	4	2	405	46.2	5.53	12.37	0	1	8.00741e+06	High
Q96FQ6	Protein S100-A16	S100A16	Protein S100-A16 OS=Homo sapiens OX=9606 GN=S100A16 PE=1 SV=1	0	6.969	23	2	2	2	103	11.8	6.79	5.76	0	1	6053998	High
P30041	Peroxiredoxin-6	PRDX6	Peroxiredoxin-6 OS=Homo sapiens OX=9606 GN=PRDX6 PE=1 SV=3	0	6.952	14	3	4	3	224	25	6.38	9.02	0	1	7.78812e+06	High
P26373	60S ribosomal protein L13	RPL13	60S ribosomal protein L13 OS=Homo sapiens OX=9606 GN=RPL13 PE=1 SV=4	0	6.948	11	2	6	2	211	24.2	11.65	17.48	0	1	16753097	High
O14950	Myosin regulatory light chain 12B	MYL12B	Myosin regulatory light chain 12B OS=Homo sapiens OX=9606 GN=MYL12B PE=1 SV=2	0	6.852	12	1	2	1	172	19.8	4.84	1.82	0	1	1.54761e+06	High
Q96HS1	Serine/threonine-protein phosphatase PGAM5, mitochondrial	PGAM5	Serine/threonine-protein phosphatase PGAM5, mitochondrial OS=Homo sapiens OX=9606 GN=PGAM5 PE=1 SV=2	0	6.824	12	3	4	3	289	32	8.68	7.72	0	1	8.42974e+06	High
P00738	Haptoglobin	HP	Haptoglobin OS=Homo sapiens OX=9606 GN=HP PE=1 SV=1	0	6.813	9	3	4	3	406	45.2	6.58	7.59	0	1	5413158	High
P50914	60S ribosomal protein L14	RPL14	60S ribosomal protein L14 OS=Homo sapiens OX=9606 GN=RPL14 PE=1 SV=4	0	6.776	6	1	2	1	215	23.4	10.93	4.51	0	1	1.0223e+07	High
Q13242	Serine/arginine-rich splicing factor 9	SRSF9	Serine/arginine-rich splicing factor 9 OS=Homo sapiens OX=9606 GN=SRSF9 PE=1 SV=1	0	6.749	18	4	4	4	221	25.5	8.65	7.04	0	1	4.80953e+06	High
P35326	Small proline-rich protein 2A	SPRR2A	Small proline-rich protein 2A OS=Homo sapiens OX=9606 GN=SPRR2A PE=1 SV=1	0	6.701	61	3	8	1	72	8	8.43	16.32	0	1	2.31259e+06	High
Q32P51	Heterogeneous nuclear ribonucleoprotein A1-like 2	HNRNPA1L2	Heterogeneous nuclear ribonucleoprotein A1-like 2 OS=Homo sapiens OX=9606 GN=HNRNPA1L2 PE=2 SV=2	0	6.673	10	3	4	2	320	34.2	9	9.39	0	1	3.85678e+06	High
Q15365	Poly(rC)-binding protein 1	PCBP1	Poly(rC)-binding protein 1 OS=Homo sapiens OX=9606 GN=PCBP1 PE=1 SV=2	0	6.634	15	4	4	4	356	37.5	7.09	6.57	0	1	4.19528e+06	High
P67870	Casein kinase II subunit beta	CSNK2B	Casein kinase II subunit beta OS=Homo sapiens OX=9606 GN=CSNK2B PE=1 SV=1	0	6.591	19	3	5	3	215	24.9	5.55	7.37	0	1	5.18466e+06	High
P05141	ADP/ATP translocase 2	SLC25A5	ADP/ATP translocase 2 OS=Homo sapiens OX=9606 GN=SLC25A5 PE=1 SV=7	0	6.58	14	4	4	3	298	32.8	9.69	4.09	1	1	1.16541e+07	High
Q96QA5	Gasdermin-A	GSDMA	Gasdermin-A OS=Homo sapiens OX=9606 GN=GSDMA PE=1 SV=4	0	6.519	6	4	6	4	445	49.3	5.29	9.72	0	1	1.04402e+07	High
P32119	Peroxiredoxin-2	PRDX2	Peroxiredoxin-2 OS=Homo sapiens OX=9606 GN=PRDX2 PE=1 SV=5	0	6.506	15	3	5	2	198	21.9	5.97	10.38	0	1	5995982	High
O14979	Heterogeneous nuclear ribonucleoprotein D-like	HNRNPDL	Heterogeneous nuclear ribonucleoprotein D-like OS=Homo sapiens OX=9606 GN=HNRNPDL PE=1 SV=3	0	6.342	4	1	1	1	420	46.4	9.57	2.76	0	1	5031253	High
P61247	40S ribosomal protein S3a	RPS3A	40S ribosomal protein S3a OS=Homo sapiens OX=9606 GN=RPS3A PE=1 SV=2	0	6.329	7	2	3	2	264	29.9	9.73	7.91	0	1	1.50775e+07	High
P12273	Prolactin-inducible protein	PIP	Prolactin-inducible protein OS=Homo sapiens OX=9606 GN=PIP PE=1 SV=1	0	6.058	18	2	5	2	146	16.6	8.05	9.14	0	1	1.4962e+07	High
P62917	60S ribosomal protein L8	RPL8	60S ribosomal protein L8 OS=Homo sapiens OX=9606 GN=RPL8 PE=1 SV=2	0	6.018	11	2	4	2	257	28	11.03	10.28	0	1	27050645	High
Q9NZH8	Interleukin-36 gamma	IL36G	Interleukin-36 gamma OS=Homo sapiens OX=9606 GN=IL36G PE=1 SV=1	0	6.002	16	2	2	2	169	18.7	5.14	5.08	0	1	3.57065e+06	High
P25705	ATP synthase subunit alpha, mitochondrial	ATP5F1A	ATP synthase subunit alpha, mitochondrial OS=Homo sapiens OX=9606 GN=ATP5F1A PE=1 SV=1	0	5.952	5	2	5	2	553	59.7	9.13	14.34	0	1	1.95065e+07	High
P06753	Tropomyosin alpha-3 chain	TPM3	Tropomyosin alpha-3 chain OS=Homo sapiens OX=9606 GN=TPM3 PE=1 SV=2	0	5.78	11	3	5	2	285	32.9	4.72	11.62	0	1	1.24464e+07	High
P23490	Loricrin	LORICRIN	Loricrin OS=Homo sapiens OX=9606 GN=LORICRIN PE=1 SV=2	0	5.738	8	3	4	3	312	25.7	8.09	9.21	0	1	3.34505e+07	High
O75449	Katanin p60 ATPase-containing subunit A1	KATNA1	Katanin p60 ATPase-containing subunit A1 OS=Homo sapiens OX=9606 GN=KATNA1 PE=1 SV=1	0	5.727	2	1	5	1	491	55.9	6.9	11.78	0	1	21064062	High
P46781	40S ribosomal protein S9	RPS9	40S ribosomal protein S9 OS=Homo sapiens OX=9606 GN=RPS9 PE=1 SV=3	0	5.633	14	3	4	3	194	22.6	10.65	6.69	0	1	27471029	High
Q8IW75	Serpin A12	SERPINA12	Serpin A12 OS=Homo sapiens OX=9606 GN=SERPINA12 PE=1 SV=1	0	5.629	7	3	3	3	414	47.1	9.29	4.86	0	1	2.83905e+06	High
P31942	Heterogeneous nuclear ribonucleoprotein H3	HNRNPH3	Heterogeneous nuclear ribonucleoprotein H3 OS=Homo sapiens OX=9606 GN=HNRNPH3 PE=1 SV=2	0	5.604	8	2	3	2	346	36.9	6.87	6.66	0	1	9.04316e+06	High
Q9UKD2	mRNA turnover protein 4 homolog	MRTO4	mRNA turnover protein 4 homolog OS=Homo sapiens OX=9606 GN=MRTO4 PE=1 SV=2	0	5.563	13	3	4	3	239	27.5	8.29	9.39	0	1	3.24089e+06	High
P68104	Elongation factor 1-alpha 1	EEF1A1	Elongation factor 1-alpha 1 OS=Homo sapiens OX=9606 GN=EEF1A1 PE=1 SV=1	0	5.556	7	3	4	3	462	50.1	9.01	8.07	0	1	35584849	High
P06493	Cyclin-dependent kinase 1	CDK1	Cyclin-dependent kinase 1 OS=Homo sapiens OX=9606 GN=CDK1 PE=1 SV=3	0	5.551	12	3	4	3	297	34.1	8.4	7.83	0	1	5.22416e+06	High
P59190	Ras-related protein Rab-15	RAB15	Ras-related protein Rab-15 OS=Homo sapiens OX=9606 GN=RAB15 PE=1 SV=1	0	5.546	10	2	3	1	212	24.4	5.71	6.83	1	1	11625254	High
P10599	Thioredoxin	TXN	Thioredoxin OS=Homo sapiens OX=9606 GN=TXN PE=1 SV=3	0	5.539	21	2	4	2	105	11.7	4.92	8.26	0	1	38345323	High
Q8TBK6	Zinc finger CCHC domain-containing protein 10	ZCCHC10	Zinc finger CCHC domain-containing protein 10 OS=Homo sapiens OX=9606 GN=ZCCHC10 PE=1 SV=1	0	5.539	7	1	2	1	192	21	8.53	6.98	0	1	3.40384e+06	High
P61026	Ras-related protein Rab-10	RAB10	Ras-related protein Rab-10 OS=Homo sapiens OX=9606 GN=RAB10 PE=1 SV=1	0	5.505	12	2	3	1	200	22.5	8.38	6.71	0	1	1.00306e+06	High
O75874	Isocitrate dehydrogenase [NADP] cytoplasmic	IDH1	Isocitrate dehydrogenase [NADP] cytoplasmic OS=Homo sapiens OX=9606 GN=IDH1 PE=1 SV=2	0	5.41	6	2	3	2	414	46.6	7.01	8.07	0	1	3.47068e+06	High
P35268	60S ribosomal protein L22	RPL22	60S ribosomal protein L22 OS=Homo sapiens OX=9606 GN=RPL22 PE=1 SV=2	0	5.401	19	2	3	2	128	14.8	9.19	7.62	0	1	4.68933e+06	High
P61626	Lysozyme C	LYZ	Lysozyme C OS=Homo sapiens OX=9606 GN=LYZ PE=1 SV=1	0	5.385	8	1	4	1	148	16.5	9.16	7.03	0	1	6.63663e+06	High
A0A087WW87	Immunoglobulin kappa variable 2-40	IGKV2-40	Immunoglobulin kappa variable 2-40 OS=Homo sapiens OX=9606 GN=IGKV2-40 PE=3 SV=2	0	5.358	11	1	9	1	121	13.3	4.61	21.2	0	1	7.63776e+08	High
Q01518	Adenylyl cyclase-associated protein 1	CAP1	Adenylyl cyclase-associated protein 1 OS=Homo sapiens OX=9606 GN=CAP1 PE=1 SV=5	0	5.315	6	3	4	3	475	51.9	8.06	5.53	0	1	2.28417e+06	High
O14556	Glyceraldehyde-3-phosphate dehydrogenase, testis-specific	GAPDHS	Glyceraldehyde-3-phosphate dehydrogenase, testis-specific OS=Homo sapiens OX=9606 GN=GAPDHS PE=1 SV=2	0	5.302	5	2	3	2	408	44.5	8.19	8.02	0	1	114129142	High
P56537	Eukaryotic translation initiation factor 6	EIF6	Eukaryotic translation initiation factor 6 OS=Homo sapiens OX=9606 GN=EIF6 PE=1 SV=1	0	5.217	12	2	2	2	245	26.6	4.68	4.76	0	1	1744841	High
P50402	Emerin	EMD	Emerin OS=Homo sapiens OX=9606 GN=EMD PE=1 SV=1	0	5.201	8	2	2	2	254	29	5.5	5.66	0	1	5.04496e+06	High
P47914	60S ribosomal protein L29	RPL29	60S ribosomal protein L29 OS=Homo sapiens OX=9606 GN=RPL29 PE=1 SV=2	0	5.179	14	2	5	2	159	17.7	11.66	11.13	0	1	1.266e+07	High
P55072	Transitional endoplasmic reticulum ATPase	VCP	Transitional endoplasmic reticulum ATPase OS=Homo sapiens OX=9606 GN=VCP PE=1 SV=4	0	5.101	4	3	5	3	806	89.3	5.26	6.56	0	1	5.44673e+06	High
P09429	High mobility group protein B1	HMGB1	High mobility group protein B1 OS=Homo sapiens OX=9606 GN=HMGB1 PE=1 SV=3	0	5.095	7	2	2	2	215	24.9	5.74	2.03	0	1	3.21373e+06	High
Q9UQ35	Serine/arginine repetitive matrix protein 2	SRRM2	Serine/arginine repetitive matrix protein 2 OS=Homo sapiens OX=9606 GN=SRRM2 PE=1 SV=2	0	5.087	1	2	2	2	2752	299.4	12.06	4.99	0	1	2.40312e+06	High
P80188	Neutrophil gelatinase-associated lipocalin	LCN2	Neutrophil gelatinase-associated lipocalin OS=Homo sapiens OX=9606 GN=LCN2 PE=1 SV=2	0	5.049	8	1	1	1	198	22.6	8.91	2.91	0	1	2.20732e+06	High
P25398	40S ribosomal protein S12	RPS12	40S ribosomal protein S12 OS=Homo sapiens OX=9606 GN=RPS12 PE=1 SV=3	0	4.971	17	1	1	1	132	14.5	7.21	3.24	0	1	0	High
P61978	Heterogeneous nuclear ribonucleoprotein K	HNRNPK	Heterogeneous nuclear ribonucleoprotein K OS=Homo sapiens OX=9606 GN=HNRNPK PE=1 SV=1	0	4.971	6	2	2	2	463	50.9	5.54	5.19	0	1	7.33175e+06	High
Q15149	Plectin	PLEC	Plectin OS=Homo sapiens OX=9606 GN=PLEC PE=1 SV=3	0	4.896	1	3	4	3	4684	531.5	5.96	5.97	0	1	7.42373e+06	High
P22528	Cornifin-B	SPRR1B	Cornifin-B OS=Homo sapiens OX=9606 GN=SPRR1B PE=1 SV=2	0	4.872	53	3	3	1	89	9.9	8.48	6.58	0	1	10862007	High
P42357	Histidine ammonia-lyase	HAL	Histidine ammonia-lyase OS=Homo sapiens OX=9606 GN=HAL PE=1 SV=1	0	4.8	4	3	3	3	657	72.7	6.95	4.98	0	1	4.77276e+06	High
P01876	Immunoglobulin heavy constant alpha 1	IGHA1	Immunoglobulin heavy constant alpha 1 OS=Homo sapiens OX=9606 GN=IGHA1 PE=1 SV=2	0	4.716	9	3	4	3	353	37.6	6.51	6.61	0	1	8.15299e+06	High
P61106	Ras-related protein Rab-14	RAB14	Ras-related protein Rab-14 OS=Homo sapiens OX=9606 GN=RAB14 PE=1 SV=4	0	4.666	7	1	1	1	215	23.9	6.21	3.92	0	1	2.16101e+06	High
P21796	Voltage-dependent anion-selective channel protein 1	VDAC1	Voltage-dependent anion-selective channel protein 1 OS=Homo sapiens OX=9606 GN=VDAC1 PE=1 SV=2	0	4.517	9	2	2	2	283	30.8	8.54	4.07	0	1	2.0204e+06	High
Q8NEX9	Short-chain dehydrogenase/reductase family 9C member 7	SDR9C7	Short-chain dehydrogenase/reductase family 9C member 7 OS=Homo sapiens OX=9606 GN=SDR9C7 PE=1 SV=1	0	4.501	10	3	4	3	313	35.2	9.16	3.94	0	1	2.33061e+06	High
P07237	Protein disulfide-isomerase	P4HB	Protein disulfide-isomerase OS=Homo sapiens OX=9606 GN=P4HB PE=1 SV=3	0	4.485	5	2	2	2	508	57.1	4.87	2.31	0	1	4.71132e+06	High
Q3SY84	Keratin, type II cytoskeletal 71	KRT71	Keratin, type II cytoskeletal 71 OS=Homo sapiens OX=9606 GN=KRT71 PE=1 SV=3	0	4.472	4	2	3	1	523	57.3	6.61	6.41	0	1	518285	High
P51148	Ras-related protein Rab-5C	RAB5C	Ras-related protein Rab-5C OS=Homo sapiens OX=9606 GN=RAB5C PE=1 SV=2	0	4.464	10	2	3	2	216	23.5	8.41	7.06	0	1	3.66933e+06	High
O00571	ATP-dependent RNA helicase DDX3X	DDX3X	ATP-dependent RNA helicase DDX3X OS=Homo sapiens OX=9606 GN=DDX3X PE=1 SV=3	0	4.385	3	2	2	2	662	73.2	7.18	4.71	0	1	2.24918e+06	High
P12081	Histidine--tRNA ligase, cytoplasmic	HARS1	Histidine--tRNA ligase, cytoplasmic OS=Homo sapiens OX=9606 GN=HARS1 PE=1 SV=2	0	4.372	4	2	2	2	509	57.4	5.88	2.28	0	1	730875	High
Q9BU76	Multiple myeloma tumor-associated protein 2	MMTAG2	Multiple myeloma tumor-associated protein 2 OS=Homo sapiens OX=9606 GN=MMTAG2 PE=1 SV=1	0	4.336	5	1	1	1	263	29.4	10.02	3.51	0	1	2.43593e+06	High
P19784	Casein kinase II subunit alpha'	CSNK2A2	Casein kinase II subunit alpha' OS=Homo sapiens OX=9606 GN=CSNK2A2 PE=1 SV=1	0	4.3	4	1	1	1	350	41.2	8.56	2.8	0	1	1.00042e+06	High
P26641	Elongation factor 1-gamma	EEF1G	Elongation factor 1-gamma OS=Homo sapiens OX=9606 GN=EEF1G PE=1 SV=3	0	4.292	3	1	2	1	437	50.1	6.67	5.02	0	1	1.30929e+06	High
P37837	Transaldolase	TALDO1	Transaldolase OS=Homo sapiens OX=9606 GN=TALDO1 PE=1 SV=2	0	4.241	7	2	2	2	337	37.5	6.81	3.97	0	1	8.37026e+06	High
P35030	Trypsin-3	PRSS3	Trypsin-3 OS=Homo sapiens OX=9606 GN=PRSS3 PE=1 SV=2	0	4.21	4	1	2	1	304	32.5	7.49	6.1	0	1	19060302	High
P13804	Electron transfer flavoprotein subunit alpha, mitochondrial	ETFA	Electron transfer flavoprotein subunit alpha, mitochondrial OS=Homo sapiens OX=9606 GN=ETFA PE=1 SV=1	0	4.178	6	1	1	1	333	35.1	8.38	3.33	0	1	10345539	High
P05120	Plasminogen activator inhibitor 2	SERPINB2	Plasminogen activator inhibitor 2 OS=Homo sapiens OX=9606 GN=SERPINB2 PE=1 SV=2	0	4.168	6	2	3	2	415	46.6	5.63	2.23	0	1	1.00275e+06	High
A8K2U0	Alpha-2-macroglobulin-like protein 1	A2ML1	Alpha-2-macroglobulin-like protein 1 OS=Homo sapiens OX=9606 GN=A2ML1 PE=1 SV=3	0	4.129	1	1	1	1	1454	161	5.73	3.07	0	1	1.79614e+06	High
P47755	F-actin-capping protein subunit alpha-2	CAPZA2	F-actin-capping protein subunit alpha-2 OS=Homo sapiens OX=9606 GN=CAPZA2 PE=1 SV=3	0	4.127	8	2	3	1	286	32.9	5.85	6.57	0	1	800867	High
O14818	Proteasome subunit alpha type-7	PSMA7	Proteasome subunit alpha type-7 OS=Homo sapiens OX=9606 GN=PSMA7 PE=1 SV=1	0	4.12	9	2	3	2	248	27.9	8.46	5.65	0	1	2.52003e+06	High
Q9UI42	Carboxypeptidase A4	CPA4	Carboxypeptidase A4 OS=Homo sapiens OX=9606 GN=CPA4 PE=1 SV=2	0	4.118	5	2	3	2	421	47.3	6.7	7.57	0	1	5.76009e+06	High
P49327	Fatty acid synthase	FASN	Fatty acid synthase OS=Homo sapiens OX=9606 GN=FASN PE=1 SV=3	0	4.046	1	3	3	3	2511	273.3	6.44	4.14	0	1	1.42814e+06	High
O76031	ATP-dependent Clp protease ATP-binding subunit clpX-like, mitochondrial	CLPX	ATP-dependent Clp protease ATP-binding subunit clpX-like, mitochondrial OS=Homo sapiens OX=9606 GN=CLPX PE=1 SV=2	0	4.044	2	1	3	1	633	69.2	7.58	8.42	0	1	12471298	High
P38159	RNA-binding motif protein, X chromosome	RBMX	RNA-binding motif protein, X chromosome OS=Homo sapiens OX=9606 GN=RBMX PE=1 SV=3	0	4.03	3	1	3	1	391	42.3	10.05	8.32	0	1	3299693	High
P06396	Gelsolin	GSN	Gelsolin OS=Homo sapiens OX=9606 GN=GSN PE=1 SV=1	0	4.021	3	2	2	2	782	85.6	6.28	1.68	0	1	1.90293e+06	High
P59665	Neutrophil defensin 1	DEFA1B	Neutrophil defensin 1 OS=Homo sapiens OX=9606 GN=DEFA1B PE=1 SV=1	0	3.997	19	2	6	2	94	10.2	6.99	13.62	0	1	23289700	High
Q15717	ELAV-like protein 1	ELAVL1	ELAV-like protein 1 OS=Homo sapiens OX=9606 GN=ELAVL1 PE=1 SV=2	0	3.934	4	1	1	1	326	36.1	9.17	2.06	0	1	1158145	High
Q14651	Plastin-1	PLS1	Plastin-1 OS=Homo sapiens OX=9606 GN=PLS1 PE=1 SV=2	0	3.728	4	2	2	2	629	70.2	5.41	4.18	0	1	2.2031e+06	High
P35232	Prohibitin 1	PHB1	Prohibitin 1 OS=Homo sapiens OX=9606 GN=PHB1 PE=1 SV=1	0	3.722	8	2	2	2	272	29.8	5.76	4.26	0	1	4989146	High
Q12904	Aminoacyl tRNA synthase complex-interacting multifunctional protein 1	AIMP1	Aminoacyl tRNA synthase complex-interacting multifunctional protein 1 OS=Homo sapiens OX=9606 GN=AIMP1 PE=1 SV=2	0	3.624	4	1	1	1	312	34.3	8.43	2.92	0	1	1.38265e+06	High
Q15181	Inorganic pyrophosphatase	PPA1	Inorganic pyrophosphatase OS=Homo sapiens OX=9606 GN=PPA1 PE=1 SV=2	0	3.62	3	1	3	1	289	32.6	5.86	4.67	0	1	3.65361e+06	High
P01024	Complement C3	C3	Complement C3 OS=Homo sapiens OX=9606 GN=C3 PE=1 SV=2	0	3.578	1	1	1	1	1663	187	6.4	2.46	0	1	0	High
P60842	Eukaryotic initiation factor 4A-I	EIF4A1	Eukaryotic initiation factor 4A-I OS=Homo sapiens OX=9606 GN=EIF4A1 PE=1 SV=1	0	3.569	5	2	3	2	406	46.1	5.48	7.41	0	1	5.33453e+06	High
O75223	Gamma-glutamylcyclotransferase	GGCT	Gamma-glutamylcyclotransferase OS=Homo sapiens OX=9606 GN=GGCT PE=1 SV=1	0	3.568	11	2	2	2	188	21	5.14	2.53	0	1	6.20183e+06	High
P17931	Galectin-3	LGALS3	Galectin-3 OS=Homo sapiens OX=9606 GN=LGALS3 PE=1 SV=5	0	3.563	10	2	2	2	250	26.1	8.56	0	0	1	1651432	High
P05388	60S acidic ribosomal protein P0	RPLP0	60S acidic ribosomal protein P0 OS=Homo sapiens OX=9606 GN=RPLP0 PE=1 SV=1	0	3.551	10	2	2	2	317	34.3	5.97	4.3	0	1	3.32269e+06	High
P06576	ATP synthase subunit beta, mitochondrial	ATP5F1B	ATP synthase subunit beta, mitochondrial OS=Homo sapiens OX=9606 GN=ATP5F1B PE=1 SV=3	0	3.478	4	2	2	2	529	56.5	5.4	4.99	0	1	2.09543e+06	High
Q9BPW8	Protein NipSnap homolog 1	NIPSNAP1	Protein NipSnap homolog 1 OS=Homo sapiens OX=9606 GN=NIPSNAP1 PE=1 SV=1	0	3.469	7	2	2	2	284	33.3	9.31	1.86	0	1	2.64488e+06	High
Q16778	Histone H2B type 2-E	H2BC21	Histone H2B type 2-E OS=Homo sapiens OX=9606 GN=H2BC21 PE=1 SV=3	0	3.46	16	2	3	2	126	13.9	10.32	3.77	0	1	1.52317e+07	High
P50991	T-complex protein 1 subunit delta	CCT4	T-complex protein 1 subunit delta OS=Homo sapiens OX=9606 GN=CCT4 PE=1 SV=4	0	3.427	2	1	2	1	539	57.9	7.83	4.76	0	1	2.74762e+06	High
P30086	Phosphatidylethanolamine-binding protein 1	PEBP1	Phosphatidylethanolamine-binding protein 1 OS=Homo sapiens OX=9606 GN=PEBP1 PE=1 SV=3	0	3.409	7	1	1	1	187	21	7.53	3.07	0	1	1232052	High
P25786	Proteasome subunit alpha type-1	PSMA1	Proteasome subunit alpha type-1 OS=Homo sapiens OX=9606 GN=PSMA1 PE=1 SV=1	0	3.403	10	2	3	2	263	29.5	6.61	1.89	0	1	760374	High
P12236	ADP/ATP translocase 3	SLC25A6	ADP/ATP translocase 3 OS=Homo sapiens OX=9606 GN=SLC25A6 PE=1 SV=4	0	3.375	7	2	2	1	298	32.8	9.74	1.88	0	1	3451515	High
E9PAV3	Nascent polypeptide-associated complex subunit alpha, muscle-specific form	NACA	Nascent polypeptide-associated complex subunit alpha, muscle-specific form OS=Homo sapiens OX=9606 GN=NACA PE=1 SV=1	0	3.316	1	1	1	1	2078	205.3	9.58	2.13	0	1	3.15855e+06	High
Q9GZZ8	Extracellular glycoprotein lacritin	LACRT	Extracellular glycoprotein lacritin OS=Homo sapiens OX=9606 GN=LACRT PE=1 SV=1	0	3.31	17	2	2	2	138	14.2	5.5	1.93	0	1	3.32144e+06	High
P25788	Proteasome subunit alpha type-3	PSMA3	Proteasome subunit alpha type-3 OS=Homo sapiens OX=9606 GN=PSMA3 PE=1 SV=2	0	3.261	7	2	2	2	255	28.4	5.33	3.6	0	1	1.30349e+06	High
Q14574	Desmocollin-3	DSC3	Desmocollin-3 OS=Homo sapiens OX=9606 GN=DSC3 PE=1 SV=3	0	3.21	3	2	2	2	896	99.9	6.1	2.64	0	1	4.66293e+06	High
Q12906	Interleukin enhancer-binding factor 3	ILF3	Interleukin enhancer-binding factor 3 OS=Homo sapiens OX=9606 GN=ILF3 PE=1 SV=3	0	3.176	1	1	3	1	894	95.3	8.76	5.67	0	1	924006	High
P52565	Rho GDP-dissociation inhibitor 1	ARHGDIA	Rho GDP-dissociation inhibitor 1 OS=Homo sapiens OX=9606 GN=ARHGDIA PE=1 SV=3	0	3.157	7	1	1	1	204	23.2	5.11	2.62	0	1	1.34682e+06	High
Q16610	Extracellular matrix protein 1	ECM1	Extracellular matrix protein 1 OS=Homo sapiens OX=9606 GN=ECM1 PE=1 SV=2	0	3.083	2	1	1	1	540	60.6	6.71	2.9	0	1	1.89476e+06	High
P46777	60S ribosomal protein L5	RPL5	60S ribosomal protein L5 OS=Homo sapiens OX=9606 GN=RPL5 PE=1 SV=3	0	3.044	5	1	3	1	297	34.3	9.72	1.73	0	1	5428296	High
P13489	Ribonuclease inhibitor	RNH1	Ribonuclease inhibitor OS=Homo sapiens OX=9606 GN=RNH1 PE=1 SV=2	0	3.019	3	1	1	1	461	49.9	4.82	2.37	0	1	2.34983e+06	High
P24534	Elongation factor 1-beta	EEF1B2	Elongation factor 1-beta OS=Homo sapiens OX=9606 GN=EEF1B2 PE=1 SV=3	0	2.987	7	1	1	1	225	24.7	4.67	2.67	0	1	687196	High
Q92817	Envoplakin	EVPL	Envoplakin OS=Homo sapiens OX=9606 GN=EVPL PE=1 SV=3	0	2.954	1	2	2	2	2033	231.5	6.96	3.49	0	1	1.3657e+06	High
O00193	Small acidic protein	SMAP	Small acidic protein OS=Homo sapiens OX=9606 GN=SMAP PE=1 SV=1	0	2.932	9	1	1	1	183	20.3	4.72	2.51	0	1	896501	High
P50452	Serpin B8	SERPINB8	Serpin B8 OS=Homo sapiens OX=9606 GN=SERPINB8 PE=1 SV=2	0	2.869	6	2	2	2	374	42.7	5.57	4.4	0	1	1.51646e+06	High
P40121	Macrophage-capping protein	CAPG	Macrophage-capping protein OS=Homo sapiens OX=9606 GN=CAPG PE=1 SV=2	0	2.84	3	1	1	1	348	38.5	6.19	1.92	0	1	611667	High
P01591	Immunoglobulin J chain	JCHAIN	Immunoglobulin J chain OS=Homo sapiens OX=9606 GN=JCHAIN PE=1 SV=4	0	2.822	8	1	1	1	159	18.1	5.24	1.71	0	1	883844	High
P06748	Nucleophosmin	NPM1	Nucleophosmin OS=Homo sapiens OX=9606 GN=NPM1 PE=1 SV=2	0	2.791	4	1	1	1	294	32.6	4.78	2.32	0	1	2490990	High
P23528	Cofilin-1	CFL1	Cofilin-1 OS=Homo sapiens OX=9606 GN=CFL1 PE=1 SV=3	0	2.779	7	1	1	1	166	18.5	8.09	2.98	0	1	1.95914e+06	High
Q15517	Corneodesmosin	CDSN	Corneodesmosin OS=Homo sapiens OX=9606 GN=CDSN PE=1 SV=3	0	2.754	3	1	2	1	529	51.5	8.35	5.07	0	1	11161066	High
P43490	Nicotinamide phosphoribosyltransferase	NAMPT	Nicotinamide phosphoribosyltransferase OS=Homo sapiens OX=9606 GN=NAMPT PE=1 SV=1	0	2.743	5	2	2	2	491	55.5	7.15	1.89	0	1	2.20221e+06	High
Q13510	Acid ceramidase	ASAH1	Acid ceramidase OS=Homo sapiens OX=9606 GN=ASAH1 PE=1 SV=5	0	2.73	3	1	2	1	395	44.6	7.62	2.25	0	1	548880	High
P51991	Heterogeneous nuclear ribonucleoprotein A3	HNRNPA3	Heterogeneous nuclear ribonucleoprotein A3 OS=Homo sapiens OX=9606 GN=HNRNPA3 PE=1 SV=2	0	2.719	5	2	2	2	378	39.6	9.01	1.66	0	1	3594469	High
Q7L5L3	Lysophospholipase D GDPD3	GDPD3	Lysophospholipase D GDPD3 OS=Homo sapiens OX=9606 GN=GDPD3 PE=1 SV=3	0	2.695	8	2	2	2	318	36.6	7.97	1.64	0	1	952306	High
P39023	60S ribosomal protein L3	RPL3	60S ribosomal protein L3 OS=Homo sapiens OX=9606 GN=RPL3 PE=1 SV=2	0	2.683	3	1	1	1	403	46.1	10.18	1.82	0	1	970140	High
P30050	60S ribosomal protein L12	RPL12	60S ribosomal protein L12 OS=Homo sapiens OX=9606 GN=RPL12 PE=1 SV=1	0	2.656	10	1	1	1	165	17.8	9.42	1.62	0	1	1956392	High
O75489	NADH dehydrogenase [ubiquinone] iron-sulfur protein 3, mitochondrial	NDUFS3	NADH dehydrogenase [ubiquinone] iron-sulfur protein 3, mitochondrial OS=Homo sapiens OX=9606 GN=NDUFS3 PE=1 SV=1	0	2.648	5	1	1	1	264	30.2	7.5	2.07	0	1	301688	High
Q16777	Histone H2A type 2-C	H2AC20	Histone H2A type 2-C OS=Homo sapiens OX=9606 GN=H2AC20 PE=1 SV=4	0	2.616	12	2	2	2	129	14	10.9	2.38	0	1	2.29162e+07	High
P62081	40S ribosomal protein S7	RPS7	40S ribosomal protein S7 OS=Homo sapiens OX=9606 GN=RPS7 PE=1 SV=1	0	2.612	9	2	2	2	194	22.1	10.1	4.43	0	1	1.01842e+07	High
P31943	Heterogeneous nuclear ribonucleoprotein H	HNRNPH1	Heterogeneous nuclear ribonucleoprotein H OS=Homo sapiens OX=9606 GN=HNRNPH1 PE=1 SV=4	0	2.592	4	1	1	1	449	49.2	6.3	0	0	1	660167	High
Q02543	60S ribosomal protein L18a	RPL18A	60S ribosomal protein L18a OS=Homo sapiens OX=9606 GN=RPL18A PE=1 SV=2	0	2.59	6	1	2	1	176	20.7	10.71	1.85	0	1	1.54476e+06	High
Q9BTT0	Acidic leucine-rich nuclear phosphoprotein 32 family member E	ANP32E	Acidic leucine-rich nuclear phosphoprotein 32 family member E OS=Homo sapiens OX=9606 GN=ANP32E PE=1 SV=1	0	2.573	4	1	1	1	268	30.7	3.85	1.81	0	1	1.66458e+06	High
P09972	Fructose-bisphosphate aldolase C	ALDOC	Fructose-bisphosphate aldolase C OS=Homo sapiens OX=9606 GN=ALDOC PE=1 SV=2	0	2.512	6	1	1	1	364	39.4	6.87	2.08	0	1	952109	High
Q12905	Interleukin enhancer-binding factor 2	ILF2	Interleukin enhancer-binding factor 2 OS=Homo sapiens OX=9606 GN=ILF2 PE=1 SV=2	0	2.497	3	1	2	1	390	43	5.26	4.2	0	1	985285	High
Q00325	Phosphate carrier protein, mitochondrial	SLC25A3	Phosphate carrier protein, mitochondrial OS=Homo sapiens OX=9606 GN=SLC25A3 PE=1 SV=2	0	2.485	7	2	2	2	362	40.1	9.38	1.63	0	1	6.32356e+06	High
P78371	T-complex protein 1 subunit beta	CCT2	T-complex protein 1 subunit beta OS=Homo sapiens OX=9606 GN=CCT2 PE=1 SV=4	0	2.48	4	1	1	1	535	57.5	6.46	0	0	1	220600	High
Q9Y4Z0	U6 snRNA-associated Sm-like protein LSm4	LSM4	U6 snRNA-associated Sm-like protein LSm4 OS=Homo sapiens OX=9606 GN=LSM4 PE=1 SV=1	0	2.475	6	1	3	1	139	15.3	9.99	7	0	1	1.62047e+07	High
P15531	Nucleoside diphosphate kinase A	NME1	Nucleoside diphosphate kinase A OS=Homo sapiens OX=9606 GN=NME1 PE=1 SV=1	0	2.471	8	1	2	1	152	17.1	6.19	5.28	0	1	845316	High
P57088	Transmembrane protein 33	TMEM33	Transmembrane protein 33 OS=Homo sapiens OX=9606 GN=TMEM33 PE=1 SV=2	0	2.466	5	1	1	1	247	28	9.7	2.31	0	1	331005	High
Q9P2T1	GMP reductase 2	GMPR2	GMP reductase 2 OS=Homo sapiens OX=9606 GN=GMPR2 PE=1 SV=1	0	2.464	3	1	2	1	348	37.9	7.23	4.3	0	1	4.27005e+06	High
P0DP57	Secreted Ly-6/uPAR domain-containing protein 2	SLURP2	Secreted Ly-6/uPAR domain-containing protein 2 OS=Homo sapiens OX=9606 GN=SLURP2 PE=1 SV=1	0	2.456	13	1	1	1	97	10.2	6.62	1.63	0	1	0	High
P53634	Dipeptidyl peptidase 1	CTSC	Dipeptidyl peptidase 1 OS=Homo sapiens OX=9606 GN=CTSC PE=1 SV=2	0	2.456	7	2	2	2	463	51.8	6.99	1.66	0	1	1.53639e+06	High
P19971	Thymidine phosphorylase	TYMP	Thymidine phosphorylase OS=Homo sapiens OX=9606 GN=TYMP PE=1 SV=2	0	2.437	2	1	1	1	482	49.9	5.53	2.68	0	1	1.32038e+06	High
P61619	Protein transport protein Sec61 subunit alpha isoform 1	SEC61A1	Protein transport protein Sec61 subunit alpha isoform 1 OS=Homo sapiens OX=9606 GN=SEC61A1 PE=1 SV=2	0	2.413	2	1	2	1	476	52.2	8.06	4.52	0	1	1.48149e+06	High
P04843	Dolichyl-diphosphooligosaccharide--protein glycosyltransferase subunit 1	RPN1	Dolichyl-diphosphooligosaccharide--protein glycosyltransferase subunit 1 OS=Homo sapiens OX=9606 GN=RPN1 PE=1 SV=1	0	2.399	2	1	1	1	607	68.5	6.38	2.09	0	1	225872	High
P40925	Malate dehydrogenase, cytoplasmic	MDH1	Malate dehydrogenase, cytoplasmic OS=Homo sapiens OX=9606 GN=MDH1 PE=1 SV=4	0	2.326	5	1	2	1	334	36.4	7.36	4.09	0	1	720746	High
P11498	Pyruvate carboxylase, mitochondrial	PC	Pyruvate carboxylase, mitochondrial OS=Homo sapiens OX=9606 GN=PC PE=1 SV=2	0	2.322	1	1	2	1	1178	129.6	6.84	4.66	0	1	23926996	High
P07858	Cathepsin B	CTSB	Cathepsin B OS=Homo sapiens OX=9606 GN=CTSB PE=1 SV=3	0	2.29	5	1	1	1	339	37.8	6.3	2.24	0	1	1.03773e+06	High
Q6P6C2	RNA demethylase ALKBH5	ALKBH5	RNA demethylase ALKBH5 OS=Homo sapiens OX=9606 GN=ALKBH5 PE=1 SV=2	0	2.28	3	1	2	1	394	44.2	9.09	4.29	0	1	5033176	High
Q15287	RNA-binding protein with serine-rich domain 1	RNPS1	RNA-binding protein with serine-rich domain 1 OS=Homo sapiens OX=9606 GN=RNPS1 PE=1 SV=1	0	2.261	5	1	1	1	305	34.2	11.84	2.15	0	1	724240	High
Q5T750	Skin-specific protein 32	XP32	Skin-specific protein 32 OS=Homo sapiens OX=9606 GN=XP32 PE=1 SV=1	0	2.235	4	1	1	1	250	26.2	7.97	1.99	0	1	2.43908e+06	High
P08246	Neutrophil elastase	ELANE	Neutrophil elastase OS=Homo sapiens OX=9606 GN=ELANE PE=1 SV=1	0	2.233	4	1	1	1	267	28.5	9.35	2.18	0	1	2.43934e+06	High
Q92522	Histone H1.10	H1-10	Histone H1.10 OS=Homo sapiens OX=9606 GN=H1-10 PE=1 SV=1	0	2.231	5	1	2	1	213	22.5	10.76	5.24	0	1	1.40429e+06	High
Q13151	Heterogeneous nuclear ribonucleoprotein A0	HNRNPA0	Heterogeneous nuclear ribonucleoprotein A0 OS=Homo sapiens OX=9606 GN=HNRNPA0 PE=1 SV=1	0	2.224	4	1	1	1	305	30.8	9.29	2.71	0	1	2.09004e+06	High
B9A064	Immunoglobulin lambda-like polypeptide 5	IGLL5	Immunoglobulin lambda-like polypeptide 5 OS=Homo sapiens OX=9606 GN=IGLL5 PE=2 SV=2	0	2.216	7	1	1	1	214	23	8.84	2.07	0	1	3.62761e+06	High
Q99729	Heterogeneous nuclear ribonucleoprotein A/B	HNRNPAB	Heterogeneous nuclear ribonucleoprotein A/B OS=Homo sapiens OX=9606 GN=HNRNPAB PE=1 SV=2	0	2.2	4	1	1	1	332	36.2	8.21	1.65	0	1	0	High
Q96FJ2	Dynein light chain 2, cytoplasmic	DYNLL2	Dynein light chain 2, cytoplasmic OS=Homo sapiens OX=9606 GN=DYNLL2 PE=1 SV=1	0	2.146	12	1	1	1	89	10.3	7.37	0	0	1	3775430	High
P40227	T-complex protein 1 subunit zeta	CCT6A	T-complex protein 1 subunit zeta OS=Homo sapiens OX=9606 GN=CCT6A PE=1 SV=3	0	2.131	2	1	1	1	531	58	6.68	1.75	0	1	345880	High
P17900	Ganglioside GM2 activator	GM2A	Ganglioside GM2 activator OS=Homo sapiens OX=9606 GN=GM2A PE=1 SV=4	0	2.125	5	1	3	1	193	20.8	5.31	6.72	0	1	3.52432e+06	High
Q9Y6A4	Cilia- and flagella-associated protein 20	CFAP20	Cilia- and flagella-associated protein 20 OS=Homo sapiens OX=9606 GN=CFAP20 PE=1 SV=1	0	2.123	6	1	1	1	193	22.8	9.76	1.95	0	1	1.53001e+06	High
P61160	Actin-related protein 2	ACTR2	Actin-related protein 2 OS=Homo sapiens OX=9606 GN=ACTR2 PE=1 SV=1	0	2.108	3	1	1	1	394	44.7	6.74	2.21	0	1	2.61744e+06	High
P27348	14-3-3 protein theta	YWHAQ	14-3-3 protein theta OS=Homo sapiens OX=9606 GN=YWHAQ PE=1 SV=1	0	2.094	5	1	1	1	245	27.7	4.78	1.78	0	1	0	High
Q96G03	Phosphopentomutase	PGM2	Phosphopentomutase OS=Homo sapiens OX=9606 GN=PGM2 PE=1 SV=4	0	2.087	2	1	1	1	612	68.2	6.73	0	0	1	0	High
P06744	Glucose-6-phosphate isomerase	GPI	Glucose-6-phosphate isomerase OS=Homo sapiens OX=9606 GN=GPI PE=1 SV=4	0	2.074	3	1	1	1	558	63.1	8.32	1.97	0	1	1.6693e+06	High
Q9BV73	Centrosome-associated protein CEP250	CEP250	Centrosome-associated protein CEP250 OS=Homo sapiens OX=9606 GN=CEP250 PE=1 SV=2	0	2.066	0	1	2	1	2442	281	5.02	4.17	0	1	996470	High
Q96HU8	GTP-binding protein Di-Ras2	DIRAS2	GTP-binding protein Di-Ras2 OS=Homo sapiens OX=9606 GN=DIRAS2 PE=1 SV=1	0	2.04	6	1	7	1	199	22.5	8.76	17.3	0	1	147891520	High
B5ME19	Eukaryotic translation initiation factor 3 subunit C-like protein	EIF3CL	Eukaryotic translation initiation factor 3 subunit C-like protein OS=Homo sapiens OX=9606 GN=EIF3CL PE=1 SV=1	0	2.038	1	1	1	1	914	105.4	5.64	1.97	0	1	573216	High
P49368	T-complex protein 1 subunit gamma	CCT3	T-complex protein 1 subunit gamma OS=Homo sapiens OX=9606 GN=CCT3 PE=1 SV=4	0	2.035	2	1	1	1	545	60.5	6.49	0	0	1	752295	High
P61981	14-3-3 protein gamma	YWHAG	14-3-3 protein gamma OS=Homo sapiens OX=9606 GN=YWHAG PE=1 SV=2	0	2.009	6	1	1	1	247	28.3	4.89	1.93	0	1	1.1622e+06	High
O75635	Serpin B7	SERPINB7	Serpin B7 OS=Homo sapiens OX=9606 GN=SERPINB7 PE=1 SV=1	0	1.999	3	1	1	1	380	42.9	6.8	0	0	1	8.0739e+06	High
P62258	14-3-3 protein epsilon	YWHAE	14-3-3 protein epsilon OS=Homo sapiens OX=9606 GN=YWHAE PE=1 SV=1	0	1.98	4	1	1	1	255	29.2	4.74	2.02	0	1	1.43783e+06	High
P19404	NADH dehydrogenase [ubiquinone] flavoprotein 2, mitochondrial	NDUFV2	NADH dehydrogenase [ubiquinone] flavoprotein 2, mitochondrial OS=Homo sapiens OX=9606 GN=NDUFV2 PE=1 SV=2	0	1.944	5	1	2	1	249	27.4	8.06	4.4	0	1	458833	High
Q92820	Gamma-glutamyl hydrolase	GGH	Gamma-glutamyl hydrolase OS=Homo sapiens OX=9606 GN=GGH PE=1 SV=2	0	1.936	4	1	1	1	318	35.9	7.11	1.68	0	1	2.49439e+06	High
P29401	Transketolase	TKT	Transketolase OS=Homo sapiens OX=9606 GN=TKT PE=1 SV=3	0	1.925	3	1	1	1	623	67.8	7.66	0	0	1	1.13456e+06	High
O15173	Membrane-associated progesterone receptor component 2	PGRMC2	Membrane-associated progesterone receptor component 2 OS=Homo sapiens OX=9606 GN=PGRMC2 PE=1 SV=1	0	1.924	9	1	1	1	223	23.8	4.88	1.75	0	1	0	High
Q9Y5M8	Signal recognition particle receptor subunit beta	SRPRB	Signal recognition particle receptor subunit beta OS=Homo sapiens OX=9606 GN=SRPRB PE=1 SV=3	0	1.918	4	1	1	1	271	29.7	9.04	0	0	1	540122	High
P31025	Lipocalin-1	LCN1	Lipocalin-1 OS=Homo sapiens OX=9606 GN=LCN1 PE=1 SV=1	0	1.916	6	1	1	1	176	19.2	5.58	1.62	0	1	260760	High
Q9NSB4	Keratin, type II cuticular Hb2	KRT82	Keratin, type II cuticular Hb2 OS=Homo sapiens OX=9606 GN=KRT82 PE=1 SV=3	0	1.914	2	1	1	1	513	56.6	6.74	0	0	1	2.77929e+06	High
P28074	Proteasome subunit beta type-5	PSMB5	Proteasome subunit beta type-5 OS=Homo sapiens OX=9606 GN=PSMB5 PE=1 SV=3	0.004	1.852	4	1	1	1	263	28.5	6.92	2.97	0	1	0	High
P28066	Proteasome subunit alpha type-5	PSMA5	Proteasome subunit alpha type-5 OS=Homo sapiens OX=9606 GN=PSMA5 PE=1 SV=3	0.004	1.823	4	1	1	1	241	26.4	4.79	1.86	0	1	0	High
Q13200	26S proteasome non-ATPase regulatory subunit 2	PSMD2	26S proteasome non-ATPase regulatory subunit 2 OS=Homo sapiens OX=9606 GN=PSMD2 PE=1 SV=3	0.004	1.795	1	1	1	1	908	100.1	5.2	0	0	1	486211	High
P22061	Protein-L-isoaspartate(D-aspartate) O-methyltransferase	PCMT1	Protein-L-isoaspartate(D-aspartate) O-methyltransferase OS=Homo sapiens OX=9606 GN=PCMT1 PE=1 SV=4	0.004	1.781	5	1	1	1	227	24.6	7.21	2.56	0	1	10813832	High
Q86YT6	E3 ubiquitin-protein ligase MIB1	MIB1	E3 ubiquitin-protein ligase MIB1 OS=Homo sapiens OX=9606 GN=MIB1 PE=1 SV=1	0.004	1.751	1	1	1	1	1006	110.1	6.92	2.11	0	1	0	High
Q9UNQ2	Probable dimethyladenosine transferase	DIMT1	Probable dimethyladenosine transferase OS=Homo sapiens OX=9606 GN=DIMT1 PE=1 SV=1	0.004	1.746	4	1	1	1	313	35.2	9.99	0	0	1	118052	High
P14678	Small nuclear ribonucleoprotein-associated proteins B and B'	SNRPB	Small nuclear ribonucleoprotein-associated proteins B and B' OS=Homo sapiens OX=9606 GN=SNRPB PE=1 SV=2	0.004	1.729	3	1	1	1	240	24.6	11.19	1.85	0	1	696755	High
P28838	Cytosol aminopeptidase	LAP3	Cytosol aminopeptidase OS=Homo sapiens OX=9606 GN=LAP3 PE=1 SV=3	0.004	1.713	2	1	1	1	519	56.1	7.93	1.92	0	1	996407	High
P62937	Peptidyl-prolyl cis-trans isomerase A	PPIA	Peptidyl-prolyl cis-trans isomerase A OS=Homo sapiens OX=9606 GN=PPIA PE=1 SV=2	0.004	1.711	7	1	1	1	165	18	7.81	2.22	0	1	1.13711e+06	High
Q92743	Serine protease HTRA1	HTRA1	Serine protease HTRA1 OS=Homo sapiens OX=9606 GN=HTRA1 PE=1 SV=1	0.004	1.708	2	1	1	1	480	51.3	7.83	2.1	0	1	155657	High
P01008	Antithrombin-III	SERPINC1	Antithrombin-III OS=Homo sapiens OX=9606 GN=SERPINC1 PE=1 SV=1	0.004	1.693	2	1	2	1	464	52.6	6.71	4.07	0	1	717024	High
P09211	Glutathione S-transferase P	GSTP1	Glutathione S-transferase P OS=Homo sapiens OX=9606 GN=GSTP1 PE=1 SV=2	0.004	1.684	9	1	1	1	210	23.3	5.64	0	0	1	677876	High
P60866	40S ribosomal protein S20	RPS20	40S ribosomal protein S20 OS=Homo sapiens OX=9606 GN=RPS20 PE=1 SV=1	0.004	1.676	9	1	1	1	119	13.4	9.94	2.21	0	1	1.01247e+06	High
P49411	Elongation factor Tu, mitochondrial	TUFM	Elongation factor Tu, mitochondrial OS=Homo sapiens OX=9606 GN=TUFM PE=1 SV=3	0.004	1.662	2	1	1	1	455	49.8	7.61	0	0	1	676646	High
O60911	Cathepsin L2	CTSV	Cathepsin L2 OS=Homo sapiens OX=9606 GN=CTSV PE=1 SV=2	0.004	1.652	4	1	1	1	334	37.3	8.76	2.31	0	1	1575044	High
Q9P1U1	Actin-related protein 3B	ACTR3B	Actin-related protein 3B OS=Homo sapiens OX=9606 GN=ACTR3B PE=2 SV=1	0.004	1.649	2	1	2	1	418	47.6	5.88	4.19	0	1	1.11755e+06	High
P50395	Rab GDP dissociation inhibitor beta	GDI2	Rab GDP dissociation inhibitor beta OS=Homo sapiens OX=9606 GN=GDI2 PE=1 SV=2	0.004	1.643	3	1	1	1	445	50.6	6.47	0	0	1	363327	High
P55735	Protein SEC13 homolog	SEC13	Protein SEC13 homolog OS=Homo sapiens OX=9606 GN=SEC13 PE=1 SV=3	0.004	1.627	3	1	2	1	322	35.5	5.48	2.09	0	1	400219	High
O14744	Protein arginine N-methyltransferase 5	PRMT5	Protein arginine N-methyltransferase 5 OS=Homo sapiens OX=9606 GN=PRMT5 PE=1 SV=4	0.004	1.602	2	1	1	1	637	72.6	6.29	2.39	0	1	2140867	High
Q13423	NAD(P) transhydrogenase, mitochondrial	NNT	NAD(P) transhydrogenase, mitochondrial OS=Homo sapiens OX=9606 GN=NNT PE=1 SV=3	0.004	1.601	1	1	1	1	1086	113.8	8.09	1.87	0	1	1.14534e+06	High
P25789	Proteasome subunit alpha type-4	PSMA4	Proteasome subunit alpha type-4 OS=Homo sapiens OX=9606 GN=PSMA4 PE=1 SV=1	0.004	1.582	4	1	1	1	261	29.5	7.72	0	0	1	0	High
P28072	Proteasome subunit beta type-6	PSMB6	Proteasome subunit beta type-6 OS=Homo sapiens OX=9606 GN=PSMB6 PE=1 SV=4	0.004	1.577	5	1	1	1	239	25.3	4.92	2.53	0	1	2226259	High
P62491	Ras-related protein Rab-11A	RAB11A	Ras-related protein Rab-11A OS=Homo sapiens OX=9606 GN=RAB11A PE=1 SV=3	0.004	1.56	5	1	1	1	216	24.4	6.57	1.88	0	1	999213	High
P31153	S-adenosylmethionine synthase isoform type-2	MAT2A	S-adenosylmethionine synthase isoform type-2 OS=Homo sapiens OX=9606 GN=MAT2A PE=1 SV=1	0.004	1.547	2	1	1	1	395	43.6	6.48	2.34	0	1	2.40609e+06	High
Q9NXF7	DDB1- and CUL4-associated factor 16	DCAF16	DDB1- and CUL4-associated factor 16 OS=Homo sapiens OX=9606 GN=DCAF16 PE=1 SV=1	0.004	1.546	6	1	1	1	216	24.2	6.04	1.7	0	1	601492	High
P49748	Very long-chain specific acyl-CoA dehydrogenase, mitochondrial	ACADVL	Very long-chain specific acyl-CoA dehydrogenase, mitochondrial OS=Homo sapiens OX=9606 GN=ACADVL PE=1 SV=1	0.004	1.541	2	1	1	1	655	70.3	8.75	2.12	0	1	509668	High
O75323	Protein NipSnap homolog 2	NIPSNAP2	Protein NipSnap homolog 2 OS=Homo sapiens OX=9606 GN=NIPSNAP2 PE=1 SV=1	0.004	1.538	3	1	1	1	286	33.7	9.36	2.54	0	1	980937	High
Q9UJ70	N-acetyl-D-glucosamine kinase	NAGK	N-acetyl-D-glucosamine kinase OS=Homo sapiens OX=9606 GN=NAGK PE=1 SV=4	0.004	1.536	3	1	1	1	344	37.4	6.24	0	0	1	872767	High
P52597	Heterogeneous nuclear ribonucleoprotein F	HNRNPF	Heterogeneous nuclear ribonucleoprotein F OS=Homo sapiens OX=9606 GN=HNRNPF PE=1 SV=3	0.004	1.517	3	1	1	1	415	45.6	5.58	2.22	0	1	758357	High
O43175	D-3-phosphoglycerate dehydrogenase	PHGDH	D-3-phosphoglycerate dehydrogenase OS=Homo sapiens OX=9606 GN=PHGDH PE=1 SV=4	0.006	1.453	3	1	1	1	533	56.6	6.71	2.24	0	1	2.14291e+06	High
Q96DR8	Mucin-like protein 1	MUCL1	Mucin-like protein 1 OS=Homo sapiens OX=9606 GN=MUCL1 PE=1 SV=1	0.006	1.442	10	1	1	1	90	9	4.64	2.23	0	1	3102649	High
Q9H9B4	Sideroflexin-1	SFXN1	Sideroflexin-1 OS=Homo sapiens OX=9606 GN=SFXN1 PE=1 SV=4	0.006	1.44	3	1	1	1	322	35.6	9.07	0	0	1	647417	High
Q9Y446	Plakophilin-3	PKP3	Plakophilin-3 OS=Homo sapiens OX=9606 GN=PKP3 PE=1 SV=1	0.006	1.431	1	1	1	1	797	87	9.32	1.6	0	1	792135	High
Q9UBZ4	DNA-(apurinic or apyrimidinic site) endonuclease 2	APEX2	DNA-(apurinic or apyrimidinic site) endonuclease 2 OS=Homo sapiens OX=9606 GN=APEX2 PE=1 SV=1	0.006	1.422	2	1	1	1	518	57.4	8.29	1.87	0	1	15508061	High
P05090	Apolipoprotein D	APOD	Apolipoprotein D OS=Homo sapiens OX=9606 GN=APOD PE=1 SV=1	0.006	1.422	6	1	1	1	189	21.3	5.15	0	0	1	0	High
Q14147	Probable ATP-dependent RNA helicase DHX34	DHX34	Probable ATP-dependent RNA helicase DHX34 OS=Homo sapiens OX=9606 GN=DHX34 PE=1 SV=2	0.006	1.408	1	1	1	1	1143	128	7.56	0	0	1	4376254	High
P63220	40S ribosomal protein S21	RPS21	40S ribosomal protein S21 OS=Homo sapiens OX=9606 GN=RPS21 PE=1 SV=1	0.006	1.403	12	1	1	1	83	9.1	8.5	1.77	0	1	805993	High
P12532	Creatine kinase U-type, mitochondrial	CKMT1B	Creatine kinase U-type, mitochondrial OS=Homo sapiens OX=9606 GN=CKMT1B PE=1 SV=1	0.006	1.402	3	1	1	1	417	47	8.34	0	0	1	3.47735e+06	High
P26440	Isovaleryl-CoA dehydrogenase, mitochondrial	IVD	Isovaleryl-CoA dehydrogenase, mitochondrial OS=Homo sapiens OX=9606 GN=IVD PE=1 SV=2	0.006	1.398	2	1	1	1	426	46.6	8.05	1.74	0	1	329282	High
Q14103	Heterogeneous nuclear ribonucleoprotein D0	HNRNPD	Heterogeneous nuclear ribonucleoprotein D0 OS=Homo sapiens OX=9606 GN=HNRNPD PE=1 SV=1	0.006	1.398	4	1	1	1	355	38.4	7.81	1.64	0	1	2.11387e+06	High
P00403	Cytochrome c oxidase subunit 2	MT-CO2	Cytochrome c oxidase subunit 2 OS=Homo sapiens OX=9606 GN=MT-CO2 PE=1 SV=1	0.006	1.395	4	1	2	1	227	25.5	4.82	2.41	0	1	914923	High
Q8WWZ7	Cholesterol transporter ABCA5	ABCA5	Cholesterol transporter ABCA5 OS=Homo sapiens OX=9606 GN=ABCA5 PE=1 SV=2	0.006	1.384	1	1	1	1	1642	186.4	6.95	2.89	0	1	22240478	High
P02647	Apolipoprotein A-I	APOA1	Apolipoprotein A-I OS=Homo sapiens OX=9606 GN=APOA1 PE=1 SV=1	0.006	1.371	4	1	1	1	267	30.8	5.76	2.84	0	1	1.7976e+06	High
O60763	General vesicular transport factor p115	USO1	General vesicular transport factor p115 OS=Homo sapiens OX=9606 GN=USO1 PE=1 SV=2	0.006	1.362	1	1	1	1	962	107.8	4.91	2.04	0	1	2.23304e+06	High
P05164	Myeloperoxidase	MPO	Myeloperoxidase OS=Homo sapiens OX=9606 GN=MPO PE=1 SV=1	0.006	1.356	2	1	1	1	745	83.8	8.97	2.17	0	1	772926	High
P21128	Uridylate-specific endoribonuclease	ENDOU	Uridylate-specific endoribonuclease OS=Homo sapiens OX=9606 GN=ENDOU PE=1 SV=2	0.006	1.354	3	1	1	1	410	46.8	5.43	0	0	1	385818	High
O75436	Vacuolar protein sorting-associated protein 26A	VPS26A	Vacuolar protein sorting-associated protein 26A OS=Homo sapiens OX=9606 GN=VPS26A PE=1 SV=2	0.006	1.352	4	1	1	1	327	38.1	6.57	2.2	0	1	8293283	High
Q9H307	Pinin	PNN	Pinin OS=Homo sapiens OX=9606 GN=PNN PE=1 SV=5	0.006	1.347	2	1	1	1	717	81.6	7.14	0	0	1	0	High
P17174	Aspartate aminotransferase, cytoplasmic	GOT1	Aspartate aminotransferase, cytoplasmic OS=Homo sapiens OX=9606 GN=GOT1 PE=1 SV=3	0.006	1.336	3	1	1	1	413	46.2	7.01	1.88	0	1	1.04189e+06	High
P36578	60S ribosomal protein L4	RPL4	60S ribosomal protein L4 OS=Homo sapiens OX=9606 GN=RPL4 PE=1 SV=5	0.006	1.319	3	1	1	1	427	47.7	11.06	0	0	1	491950	High
P51608	Methyl-CpG-binding protein 2	MECP2	Methyl-CpG-binding protein 2 OS=Homo sapiens OX=9606 GN=MECP2 PE=1 SV=1	0.006	1.311	3	1	1	1	486	52.4	9.95	0	0	1	7764990	High
Q93075	Putative deoxyribonuclease TATDN2	TATDN2	Putative deoxyribonuclease TATDN2 OS=Homo sapiens OX=9606 GN=TATDN2 PE=1 SV=2	0.007	1.301	1	1	1	1	761	85	7.39	2.21	0	1	236632592	High
Q8WWL7	G2/mitotic-specific cyclin-B3	CCNB3	G2/mitotic-specific cyclin-B3 OS=Homo sapiens OX=9606 GN=CCNB3 PE=1 SV=2	0.009	1.292	1	1	1	1	1395	157.8	6.68	2.48	0	1	1573482	High
P02652	Apolipoprotein A-II	APOA2	Apolipoprotein A-II OS=Homo sapiens OX=9606 GN=APOA2 PE=1 SV=1	0.009	1.281	10	1	1	1	100	11.2	6.62	0	0	1	1.14314e+06	High
P60900	Proteasome subunit alpha type-6	PSMA6	Proteasome subunit alpha type-6 OS=Homo sapiens OX=9606 GN=PSMA6 PE=1 SV=1	0.009	1.274	5	1	1	1	246	27.4	6.76	0	0	1	434247	High
P49189	4-trimethylaminobutyraldehyde dehydrogenase	ALDH9A1	4-trimethylaminobutyraldehyde dehydrogenase OS=Homo sapiens OX=9606 GN=ALDH9A1 PE=1 SV=3	0.009	1.271	3	1	1	1	494	53.8	5.87	0	0	1	3.67292e+06	High
P13473	Lysosome-associated membrane glycoprotein 2	LAMP2	Lysosome-associated membrane glycoprotein 2 OS=Homo sapiens OX=9606 GN=LAMP2 PE=1 SV=2	0.009	1.269	2	1	2	1	410	44.9	5.63	4.27	0	1	1.40418e+06	High
P52756	RNA-binding protein 5	RBM5	RNA-binding protein 5 OS=Homo sapiens OX=9606 GN=RBM5 PE=1 SV=2	0.009	1.259	1	1	1	1	815	92.1	6.28	2.01	0	1	2.71753e+06	High
Q6NVV1	Putative 60S ribosomal protein L13a protein RPL13AP3	RPL13AP3	Putative 60S ribosomal protein L13a protein RPL13AP3 OS=Homo sapiens OX=9606 GN=RPL13AP3 PE=5 SV=1	0.009	1.253	11	1	1	1	102	12.1	10.76	2.26	0	1	5.82563e+06	High
P30740	Leukocyte elastase inhibitor	SERPINB1	Leukocyte elastase inhibitor OS=Homo sapiens OX=9606 GN=SERPINB1 PE=1 SV=1	0.011	1.243	3	1	1	1	379	42.7	6.28	0	0	1	1.99825e+06	High
O95210	Starch-binding domain-containing protein 1	STBD1	Starch-binding domain-containing protein 1 OS=Homo sapiens OX=9606 GN=STBD1 PE=1 SV=1	0.011	1.24	5	1	1	1	358	39	5.73	2.31	0	1	5.49418e+06	High
P21333	Filamin-A	FLNA	Filamin-A OS=Homo sapiens OX=9606 GN=FLNA PE=1 SV=4	0.011	1.234	1	1	1	1	2647	280.6	6.06	0	0	1	616078	High
Q9HB40	Retinoid-inducible serine carboxypeptidase	SCPEP1	Retinoid-inducible serine carboxypeptidase OS=Homo sapiens OX=9606 GN=SCPEP1 PE=1 SV=1	0.011	1.231	2	1	1	1	452	50.8	5.81	0	0	1	931364	High
O75608	Acyl-protein thioesterase 1	LYPLA1	Acyl-protein thioesterase 1 OS=Homo sapiens OX=9606 GN=LYPLA1 PE=1 SV=1	0.011	1.226	5	1	1	1	230	24.7	6.77	1.81	0	1	1.14086e+06	High
Q9Y6R7	IgGFc-binding protein	FCGBP	IgGFc-binding protein OS=Homo sapiens OX=9606 GN=FCGBP PE=1 SV=3	0.011	1.224	0	1	2	1	5405	571.6	5.34	0	0	1	1.88935e+06	High
Q86XP0	Cytosolic phospholipase A2 delta	PLA2G4D	Cytosolic phospholipase A2 delta OS=Homo sapiens OX=9606 GN=PLA2G4D PE=1 SV=2	0.011	1.221	1	1	1	1	818	91.9	5.5	0	0	1	370472	High
P25815	Protein S100-P	S100P	Protein S100-P OS=Homo sapiens OX=9606 GN=S100P PE=1 SV=2	0.011	1.219	14	1	1	1	95	10.4	4.88	0	0	1	1.4119e+06	High
Q15828	Cystatin-M	CST6	Cystatin-M OS=Homo sapiens OX=9606 GN=CST6 PE=1 SV=1	0.012	1.207	7	1	2	1	149	16.5	8.09	3.77	0	1	3.60711e+06	High
P09661	U2 small nuclear ribonucleoprotein A'	SNRPA1	U2 small nuclear ribonucleoprotein A' OS=Homo sapiens OX=9606 GN=SNRPA1 PE=1 SV=2	0.012	1.206	4	1	1	1	255	28.4	8.62	2.08	0	1	0	High
P06239	Tyrosine-protein kinase Lck	LCK	Tyrosine-protein kinase Lck OS=Homo sapiens OX=9606 GN=LCK PE=1 SV=6	0.012	1.201	2	1	1	1	509	58	5.36	2.17	0	1	2.24807e+06	High
A8MTJ3	Guanine nucleotide-binding protein G(t) subunit alpha-3	GNAT3	Guanine nucleotide-binding protein G(t) subunit alpha-3 OS=Homo sapiens OX=9606 GN=GNAT3 PE=2 SV=2	0.012	1.2	3	1	1	1	354	40.3	6.01	1.62	0	1	767336	High
Q9Y2Y9	Krueppel-like factor 13	KLF13	Krueppel-like factor 13 OS=Homo sapiens OX=9606 GN=KLF13 PE=1 SV=1	0.012	1.198	6	1	1	1	288	31.2	9.54	0	0	1	3.43583e+06	High
Q96CD2	Phosphopantothenoylcysteine decarboxylase	PPCDC	Phosphopantothenoylcysteine decarboxylase OS=Homo sapiens OX=9606 GN=PPCDC PE=1 SV=2	0.012	1.189	3	1	2	1	204	22.4	6.1	5.52	0	1	16266802	High
P29034	Protein S100-A2	S100A2	Protein S100-A2 OS=Homo sapiens OX=9606 GN=S100A2 PE=1 SV=3	0.012	1.188	10	1	1	1	98	11.1	4.78	1.69	0	1	1.3047e+06	High
Q07666	KH domain-containing, RNA-binding, signal transduction-associated protein 1	KHDRBS1	KH domain-containing, RNA-binding, signal transduction-associated protein 1 OS=Homo sapiens OX=9606 GN=KHDRBS1 PE=1 SV=1	0.012	1.184	2	1	1	1	443	48.2	8.66	0	0	1	670861	High
Q9C091	GREB1-like protein	GREB1L	GREB1-like protein OS=Homo sapiens OX=9606 GN=GREB1L PE=1 SV=2	0.012	1.182	0	1	1	1	1923	214.2	6.62	0	0	1	926710	High
Q9Y224	RNA transcription, translation and transport factor protein	RTRAF	RNA transcription, translation and transport factor protein OS=Homo sapiens OX=9606 GN=RTRAF PE=1 SV=1	0.012	1.181	4	1	1	1	244	28.1	6.65	1.99	0	1	451915	High
P35637	RNA-binding protein FUS	FUS	RNA-binding protein FUS OS=Homo sapiens OX=9606 GN=FUS PE=1 SV=1	0.012	1.172	2	1	1	1	526	53.4	9.36	0	0	1	1.98946e+06	High
Q13310	Polyadenylate-binding protein 4	PABPC4	Polyadenylate-binding protein 4 OS=Homo sapiens OX=9606 GN=PABPC4 PE=1 SV=1	0.013	1.166	2	1	1	1	644	70.7	9.26	0	0	1	553830	High
P08758	Annexin A5	ANXA5	Annexin A5 OS=Homo sapiens OX=9606 GN=ANXA5 PE=1 SV=2	0.017	1.15	3	1	1	1	320	35.9	5.05	1.93	0	1	1.12455e+06	High
P23526	Adenosylhomocysteinase	AHCY	Adenosylhomocysteinase OS=Homo sapiens OX=9606 GN=AHCY PE=1 SV=4	0.017	1.15	3	1	1	1	432	47.7	6.34	1.81	0	1	1.08678e+06	High
Q8IYJ2	Uncharacterized protein C10orf67, mitochondrial	C10orf67	Uncharacterized protein C10orf67, mitochondrial OS=Homo sapiens OX=9606 GN=C10orf67 PE=1 SV=3	0.017	1.145	3	1	2	1	551	63.6	8.84	1.69	0	1	2.50181e+06	High
O15145	Actin-related protein 2/3 complex subunit 3	ARPC3	Actin-related protein 2/3 complex subunit 3 OS=Homo sapiens OX=9606 GN=ARPC3 PE=1 SV=3	0.016	1.137	6	1	1	1	178	20.5	8.59	0	0	1	151605	High
Q9P0I2	ER membrane protein complex subunit 3	EMC3	ER membrane protein complex subunit 3 OS=Homo sapiens OX=9606 GN=EMC3 PE=1 SV=3	0.016	1.134	3	1	1	1	261	29.9	6.81	0	0	1	446424	High
P36542	ATP synthase subunit gamma, mitochondrial	ATP5F1C	ATP synthase subunit gamma, mitochondrial OS=Homo sapiens OX=9606 GN=ATP5F1C PE=1 SV=1	0.02	1.127	3	1	1	1	298	33	9.22	2.51	0	1	1.51336e+06	High
P36957	Dihydrolipoyllysine-residue succinyltransferase component of 2-oxoglutarate dehydrogenase complex, mitochondrial	DLST	Dihydrolipoyllysine-residue succinyltransferase component of 2-oxoglutarate dehydrogenase complex, mitochondrial OS=Homo sapiens OX=9606 GN=DLST PE=1 SV=4	0.02	1.123	2	1	2	1	453	48.7	8.95	4.58	0	1	3.99999e+07	High
O00148	ATP-dependent RNA helicase DDX39A	DDX39A	ATP-dependent RNA helicase DDX39A OS=Homo sapiens OX=9606 GN=DDX39A PE=1 SV=2	0.021	1.119	2	1	1	1	427	49.1	5.68	2.29	0	1	435053	High
P38646	Stress-70 protein, mitochondrial	HSPA9	Stress-70 protein, mitochondrial OS=Homo sapiens OX=9606 GN=HSPA9 PE=1 SV=2	0.021	1.117	1	1	1	1	679	73.6	6.16	2.56	0	1	15397439	High
P52272	Heterogeneous nuclear ribonucleoprotein M	HNRNPM	Heterogeneous nuclear ribonucleoprotein M OS=Homo sapiens OX=9606 GN=HNRNPM PE=1 SV=3	0.021	1.117	2	1	1	1	730	77.5	8.7	0	0	1	419347	High
Q99714	3-hydroxyacyl-CoA dehydrogenase type-2	HSD17B10	3-hydroxyacyl-CoA dehydrogenase type-2 OS=Homo sapiens OX=9606 GN=HSD17B10 PE=1 SV=3	0.023	1.102	5	1	1	1	261	26.9	7.78	1.66	0	1	187843	High
O15078	Centrosomal protein of 290 kDa	CEP290	Centrosomal protein of 290 kDa OS=Homo sapiens OX=9606 GN=CEP290 PE=1 SV=2	0.023	1.098	0	1	1	1	2479	290.2	5.95	2.52	0	1	38730388	High
D6RBQ6	Ubiquitin carboxyl-terminal hydrolase 17-like protein 17	USP17L17	Ubiquitin carboxyl-terminal hydrolase 17-like protein 17 OS=Homo sapiens OX=9606 GN=USP17L17 PE=3 SV=1	0.024	1.094	2	1	2	1	530	59.6	7.99	4.87	0	1	10604409	High
Q96RQ3	Methylcrotonoyl-CoA carboxylase subunit alpha, mitochondrial	MCCC1	Methylcrotonoyl-CoA carboxylase subunit alpha, mitochondrial OS=Homo sapiens OX=9606 GN=MCCC1 PE=1 SV=3	0.024	1.094	1	1	1	1	725	80.4	7.78	1.85	0	1	0	High

## Sheet: AS probe
Accession	Protein Name	Gene Symbol	Description	Exp. q-value: Combined	Sum PEP Score	Coverage [%]	# Peptides	# PSMs	# Unique Peptides	# AAs	MW [kDa]	calc. pI	Score Sequest HT	# Razor Peptides	# Protein Groups	Abundance: ZZ	Found in Sample: ZZ
P04264	Keratin, type II cytoskeletal 1	KRT1	Keratin, type II cytoskeletal 1 OS=Homo sapiens OX=9606 GN=KRT1 PE=1 SV=6	0	355.623	51	41	423	34	644	66	8.12	939.59	11	1	3.16976e+10	High
Q86YZ3	Hornerin	HRNR	Hornerin OS=Homo sapiens OX=9606 GN=HRNR PE=1 SV=2	0	342.685	31	31	80	31	2850	282.2	10.04	228.05	0	1	5.76964e+08	High
P35908	Keratin, type II cytoskeletal 2 epidermal	KRT2	Keratin, type II cytoskeletal 2 epidermal OS=Homo sapiens OX=9606 GN=KRT2 PE=1 SV=2	0	236.53	54	38	196	27	639	65.4	8	461.94	10	1	9.20361e+09	High
P15924	Desmoplakin	DSP	Desmoplakin OS=Homo sapiens OX=9606 GN=DSP PE=1 SV=3	0	230.582	23	75	153	75	2871	331.6	6.81	320.35	0	1	1.14445e+09	High
P35527	Keratin, type I cytoskeletal 9	KRT9	Keratin, type I cytoskeletal 9 OS=Homo sapiens OX=9606 GN=KRT9 PE=1 SV=3	0	215.359	47	25	251	25	623	62	5.24	620.6	0	1	1.59577e+10	High
Q6P6C2	RNA demethylase ALKBH5	ALKBH5	RNA demethylase ALKBH5 OS=Homo sapiens OX=9606 GN=ALKBH5 PE=1 SV=2	0	211.707	45	26	277	26	394	44.2	9.09	629.71	0	1	2.47307e+10	High
P13645	Keratin, type I cytoskeletal 10	KRT10	Keratin, type I cytoskeletal 10 OS=Homo sapiens OX=9606 GN=KRT10 PE=1 SV=6	0	205.846	46	30	204	27	584	58.8	5.21	479.85	7	1	1.34734e+10	High
P13647	Keratin, type II cytoskeletal 5	KRT5	Keratin, type II cytoskeletal 5 OS=Homo sapiens OX=9606 GN=KRT5 PE=1 SV=3	0	196.294	47	37	166	24	590	62.3	7.74	411.07	8	1	4.03299e+09	High
P08779	Keratin, type I cytoskeletal 16	KRT16	Keratin, type I cytoskeletal 16 OS=Homo sapiens OX=9606 GN=KRT16 PE=1 SV=4	0	193.44	58	29	146	17	473	51.2	5.05	355.56	14	1	5.53919e+09	High
P02538	Keratin, type II cytoskeletal 6A	KRT6A	Keratin, type II cytoskeletal 6A OS=Homo sapiens OX=9606 GN=KRT6A PE=1 SV=3	0	184.391	51	37	159	4	564	60	8	394.55	25	1	3.38995e+09	High
P04259	Keratin, type II cytoskeletal 6B	KRT6B	Keratin, type II cytoskeletal 6B OS=Homo sapiens OX=9606 GN=KRT6B PE=1 SV=5	0	180.064	48	36	164	6	564	60	8	405.36	0	1	6.2888e+08	High
P02533	Keratin, type I cytoskeletal 14	KRT14	Keratin, type I cytoskeletal 14 OS=Homo sapiens OX=9606 GN=KRT14 PE=1 SV=4	0	145.222	51	25	132	7	472	51.5	5.16	306.53	10	1	1.93144e+09	High
P02768	Albumin	ALB	Albumin OS=Homo sapiens OX=9606 GN=ALB PE=1 SV=2	0	119.66	35	25	71	25	609	69.3	6.28	142.73	0	1	1.67773e+09	High
Q5D862	Filaggrin-2	FLG2	Filaggrin-2 OS=Homo sapiens OX=9606 GN=FLG2 PE=1 SV=1	0	116.611	14	19	36	19	2391	247.9	8.31	83.77	0	1	1.29767e+08	High
Q04695	Keratin, type I cytoskeletal 17	KRT17	Keratin, type I cytoskeletal 17 OS=Homo sapiens OX=9606 GN=KRT17 PE=1 SV=2	0	98.936	41	21	75	11	432	48.1	5.02	180.2	0	1	5.44436e+08	High
Q6UWP8	Suprabasin	SBSN	Suprabasin OS=Homo sapiens OX=9606 GN=SBSN PE=1 SV=2	0	84.372	40	12	19	12	590	60.5	7.01	60.71	0	1	1.34142e+08	High
Q02413	Desmoglein-1	DSG1	Desmoglein-1 OS=Homo sapiens OX=9606 GN=DSG1 PE=1 SV=2	0	77.172	18	16	45	16	1049	113.7	5.03	99.48	0	1	1.58974e+08	High
P14923	Junction plakoglobin	JUP	Junction plakoglobin OS=Homo sapiens OX=9606 GN=JUP PE=1 SV=3	0	74.972	23	15	40	15	745	81.7	6.14	95.95	0	1	3.39872e+08	High
P05787	Keratin, type II cytoskeletal 8	KRT8	Keratin, type II cytoskeletal 8 OS=Homo sapiens OX=9606 GN=KRT8 PE=1 SV=7	0	61.831	20	13	61	7	483	53.7	5.59	153.7	0	1	2.87961e+07	High
P20930	Filaggrin	FLG	Filaggrin OS=Homo sapiens OX=9606 GN=FLG PE=1 SV=3	0	59.09	10	15	22	15	4061	434.9	9.25	58.58	0	1	5.74755e+07	High
P12035	Keratin, type II cytoskeletal 3	KRT3	Keratin, type II cytoskeletal 3 OS=Homo sapiens OX=9606 GN=KRT3 PE=1 SV=3	0	58.954	12	11	53	1	628	64.4	6.48	126.85	1	1	22603798	High
Q7Z794	Keratin, type II cytoskeletal 1b	KRT77	Keratin, type II cytoskeletal 1b OS=Homo sapiens OX=9606 GN=KRT77 PE=1 SV=3	0	58.769	18	12	57	8	578	61.9	5.99	140.58	0	1	8.2673e+07	High
O95678	Keratin, type II cytoskeletal 75	KRT75	Keratin, type II cytoskeletal 75 OS=Homo sapiens OX=9606 GN=KRT75 PE=1 SV=2	0	44.535	15	13	36	1	551	59.5	7.74	87.39	0	1	770276	High
Q9H307	Pinin	PNN	Pinin OS=Homo sapiens OX=9606 GN=PNN PE=1 SV=5	0	44.234	20	14	27	14	717	81.6	7.14	52.6	0	1	1.36223e+08	High
Q08554	Desmocollin-1	DSC1	Desmocollin-1 OS=Homo sapiens OX=9606 GN=DSC1 PE=1 SV=2	0	43.675	11	9	25	9	894	99.9	5.43	50.62	0	1	1.96901e+08	High
P60709	Actin, cytoplasmic 1	ACTB	Actin, cytoplasmic 1 OS=Homo sapiens OX=9606 GN=ACTB PE=1 SV=1	0	42.469	23	8	25	8	375	41.7	5.48	59.51	0	1	2.08635e+08	High
P19012	Keratin, type I cytoskeletal 15	KRT15	Keratin, type I cytoskeletal 15 OS=Homo sapiens OX=9606 GN=KRT15 PE=1 SV=3	0	37.551	12	6	34	1	456	49.2	4.77	80.28	0	1	1.18804e+06	High
Q08188	Protein-glutamine gamma-glutamyltransferase E	TGM3	Protein-glutamine gamma-glutamyltransferase E OS=Homo sapiens OX=9606 GN=TGM3 PE=1 SV=4	0	36.269	13	9	22	9	693	76.6	5.86	44.43	0	1	7.02091e+07	High
Q8N1N4	Keratin, type II cytoskeletal 78	KRT78	Keratin, type II cytoskeletal 78 OS=Homo sapiens OX=9606 GN=KRT78 PE=1 SV=2	0	34.919	21	10	19	7	520	56.8	6.02	40.97	0	1	5.69759e+07	High
P29508	Serpin B3	SERPINB3	Serpin B3 OS=Homo sapiens OX=9606 GN=SERPINB3 PE=1 SV=2	0	32.331	16	7	11	1	390	44.5	6.81	30.42	0	1	6.92297e+06	High
P31944	Caspase-14	CASP14	Caspase-14 OS=Homo sapiens OX=9606 GN=CASP14 PE=1 SV=2	0	31.981	20	6	18	6	242	27.7	5.58	39.8	0	1	8.01306e+07	High
P48594	Serpin B4	SERPINB4	Serpin B4 OS=Homo sapiens OX=9606 GN=SERPINB4 PE=1 SV=2	0	30.681	21	9	13	3	390	44.8	6.21	23.83	6	1	1.02069e+08	High
Q01469	Fatty acid-binding protein 5	FABP5	Fatty acid-binding protein 5 OS=Homo sapiens OX=9606 GN=FABP5 PE=1 SV=3	0	27.906	44	5	17	5	135	15.2	7.01	38.86	0	1	2.10718e+08	High
Q13835	Plakophilin-1	PKP1	Plakophilin-1 OS=Homo sapiens OX=9606 GN=PKP1 PE=1 SV=2	0	27.901	15	9	10	9	747	82.8	9.13	24.05	0	1	4.8696e+07	High
Q5T749	Keratinocyte proline-rich protein	KPRP	Keratinocyte proline-rich protein OS=Homo sapiens OX=9606 GN=KPRP PE=1 SV=1	0	27.61	13	8	29	8	579	64.1	8.27	73.82	0	1	2.5333e+08	High
P07437	Tubulin beta chain	TUBB	Tubulin beta chain OS=Homo sapiens OX=9606 GN=TUBB PE=1 SV=2	0	27.053	16	7	14	7	444	49.6	4.89	25.05	0	1	5.83613e+07	High
P68871	Hemoglobin subunit beta	HBB	Hemoglobin subunit beta OS=Homo sapiens OX=9606 GN=HBB PE=1 SV=2	0	25.051	46	6	14	6	147	16	7.28	33.21	0	1	9.29366e+07	High
P35579	Myosin-9	MYH9	Myosin-9 OS=Homo sapiens OX=9606 GN=MYH9 PE=1 SV=4	0	24.555	5	9	10	7	1960	226.4	5.6	20.21	2	1	2.71366e+07	High
P31947	14-3-3 protein sigma	SFN	14-3-3 protein sigma OS=Homo sapiens OX=9606 GN=SFN PE=1 SV=1	0	24.476	25	7	13	6	248	27.8	4.74	25.33	1	1	2.85333e+07	High
P01834	Immunoglobulin kappa constant	IGKC	Immunoglobulin kappa constant OS=Homo sapiens OX=9606 GN=IGKC PE=1 SV=2	0	22.761	35	2	5	2	107	11.8	6.52	14.84	0	1	1.02135e+07	High
P08670	Vimentin	VIM	Vimentin OS=Homo sapiens OX=9606 GN=VIM PE=1 SV=4	0	20.939	21	9	13	9	466	53.6	5.12	30.81	0	1	56788382	High
Q6KB66	Keratin, type II cytoskeletal 80	KRT80	Keratin, type II cytoskeletal 80 OS=Homo sapiens OX=9606 GN=KRT80 PE=1 SV=2	0	20.68	17	7	13	7	452	50.5	5.67	22.29	0	1	4.22854e+07	High
Q8WVV4	Protein POF1B	POF1B	Protein POF1B OS=Homo sapiens OX=9606 GN=POF1B PE=1 SV=3	0	19.422	11	6	11	6	589	68	6.32	24.77	0	1	29381271	High
P06702	Protein S100-A9	S100A9	Protein S100-A9 OS=Homo sapiens OX=9606 GN=S100A9 PE=1 SV=1	0	18.488	50	4	10	4	114	13.2	6.13	27.83	0	1	111268325	High
P22735	Protein-glutamine gamma-glutamyltransferase K	TGM1	Protein-glutamine gamma-glutamyltransferase K OS=Homo sapiens OX=9606 GN=TGM1 PE=1 SV=4	0	17.981	8	7	10	7	817	89.7	6.04	26.48	0	1	3.99219e+07	High
A8K2U0	Alpha-2-macroglobulin-like protein 1	A2ML1	Alpha-2-macroglobulin-like protein 1 OS=Homo sapiens OX=9606 GN=A2ML1 PE=1 SV=3	0	17.818	5	7	8	7	1454	161	5.73	18.49	0	1	49030266	High
P81605	Dermcidin	DCD	Dermcidin OS=Homo sapiens OX=9606 GN=DCD PE=1 SV=2	0	17.708	41	5	11	5	110	11.3	6.54	28.75	0	1	3.09181e+08	High
P07355	Annexin A2	ANXA2	Annexin A2 OS=Homo sapiens OX=9606 GN=ANXA2 PE=1 SV=2	0	17.683	21	7	14	7	339	38.6	7.75	30.86	0	1	86368775	High
P19338	Nucleolin	NCL	Nucleolin OS=Homo sapiens OX=9606 GN=NCL PE=1 SV=3	0	17.68	11	8	10	8	710	76.6	4.7	21.61	0	1	3.73312e+07	High
P0DMV9	Heat shock 70 kDa protein 1B	HSPA1B	Heat shock 70 kDa protein 1B OS=Homo sapiens OX=9606 GN=HSPA1B PE=1 SV=1	0	17.252	10	5	8	3	641	70	5.66	13.12	2	1	2.57355e+07	High
P14735	Insulin-degrading enzyme	IDE	Insulin-degrading enzyme OS=Homo sapiens OX=9606 GN=IDE PE=1 SV=4	0	17.161	8	8	16	8	1019	117.9	6.61	33.02	0	1	3.20765e+07	High
P67809	Y-box-binding protein 1	YBX1	Y-box-binding protein 1 OS=Homo sapiens OX=9606 GN=YBX1 PE=1 SV=3	0	16.925	23	6	8	5	324	35.9	9.88	16.92	1	1	4.29729e+07	High
Q7Z3Y8	Keratin, type I cytoskeletal 27	KRT27	Keratin, type I cytoskeletal 27 OS=Homo sapiens OX=9606 GN=KRT27 PE=1 SV=2	0	16.698	9	4	46	2	459	49.8	5.05	89.07	0	1	6.00084e+07	High
P60174	Triosephosphate isomerase	TPI1	Triosephosphate isomerase OS=Homo sapiens OX=9606 GN=TPI1 PE=1 SV=4	0	16.612	20	4	6	4	249	26.7	6.9	12.27	0	1	1.41768e+07	High
P04075	Fructose-bisphosphate aldolase A	ALDOA	Fructose-bisphosphate aldolase A OS=Homo sapiens OX=9606 GN=ALDOA PE=1 SV=2	0	16.386	18	6	8	6	364	39.4	8.09	16.76	0	1	2.11433e+07	High
Q5T750	Skin-specific protein 32	XP32	Skin-specific protein 32 OS=Homo sapiens OX=9606 GN=XP32 PE=1 SV=1	0	15.783	28	6	8	6	250	26.2	7.97	14.67	0	1	8.7032e+07	High
P02788	Lactotransferrin	LTF	Lactotransferrin OS=Homo sapiens OX=9606 GN=LTF PE=1 SV=6	0	15.716	11	7	11	7	710	78.1	8.12	17.65	0	1	1.25081e+07	High
P69905	Hemoglobin subunit alpha	HBA2	Hemoglobin subunit alpha OS=Homo sapiens OX=9606 GN=HBA2 PE=1 SV=2	0	15.626	19	2	6	2	142	15.2	8.68	17.15	0	1	91196692	High
P07477	Serine protease 1	PRSS1	Serine protease 1 OS=Homo sapiens OX=9606 GN=PRSS1 PE=1 SV=1	0	15.314	7	2	23	2	247	26.5	6.51	23.45	0	1	4519626892	High
P31943	Heterogeneous nuclear ribonucleoprotein H	HNRNPH1	Heterogeneous nuclear ribonucleoprotein H OS=Homo sapiens OX=9606 GN=HNRNPH1 PE=1 SV=4	0	14.513	12	4	8	4	449	49.2	6.3	16.85	0	1	1.68941e+07	High
P05109	Protein S100-A8	S100A8	Protein S100-A8 OS=Homo sapiens OX=9606 GN=S100A8 PE=1 SV=1	0	14.484	46	5	9	5	93	10.8	7.03	14.88	0	1	116708863	High
P11142	Heat shock cognate 71 kDa protein	HSPA8	Heat shock cognate 71 kDa protein OS=Homo sapiens OX=9606 GN=HSPA8 PE=1 SV=1	0	14.124	9	4	5	2	646	70.9	5.52	9.54	0	1	5.40705e+06	High
P60842	Eukaryotic initiation factor 4A-I	EIF4A1	Eukaryotic initiation factor 4A-I OS=Homo sapiens OX=9606 GN=EIF4A1 PE=1 SV=1	0	14.088	13	6	12	5	406	46.1	5.48	22.24	0	1	1.239e+07	High
P04040	Catalase	CAT	Catalase OS=Homo sapiens OX=9606 GN=CAT PE=1 SV=3	0	13.916	12	5	8	5	527	59.7	7.39	16.97	0	1	29444007	High
Q96QA5	Gasdermin-A	GSDMA	Gasdermin-A OS=Homo sapiens OX=9606 GN=GSDMA PE=1 SV=4	0	13.887	9	5	11	5	445	49.3	5.29	17.14	0	1	2.10797e+07	High
P27694	Replication protein A 70 kDa DNA-binding subunit	RPA1	Replication protein A 70 kDa DNA-binding subunit OS=Homo sapiens OX=9606 GN=RPA1 PE=1 SV=2	0	13.833	8	5	6	5	616	68.1	7.21	6.72	0	1	1.1197e+07	High
P61978	Heterogeneous nuclear ribonucleoprotein K	HNRNPK	Heterogeneous nuclear ribonucleoprotein K OS=Homo sapiens OX=9606 GN=HNRNPK PE=1 SV=1	0	13.783	14	6	9	6	463	50.9	5.54	14.37	0	1	1.71419e+07	High
Q9HCY8	Protein S100-A14	S100A14	Protein S100-A14 OS=Homo sapiens OX=9606 GN=S100A14 PE=1 SV=1	0	13.575	36	3	3	3	104	11.7	5.24	9.29	0	1	1.69599e+07	High
P05089	Arginase-1	ARG1	Arginase-1 OS=Homo sapiens OX=9606 GN=ARG1 PE=1 SV=2	0	13.532	12	4	9	4	322	34.7	7.21	16.47	0	1	5.02804e+07	High
P07339	Cathepsin D	CTSD	Cathepsin D OS=Homo sapiens OX=9606 GN=CTSD PE=1 SV=1	0	13.215	9	3	4	3	412	44.5	6.54	10.14	0	1	26979390	High
P47929	Galectin-7	LGALS7B	Galectin-7 OS=Homo sapiens OX=9606 GN=LGALS7B PE=1 SV=2	0	12.861	17	2	4	2	136	15.1	7.62	12.43	0	1	36351560	High
P22531	Small proline-rich protein 2E	SPRR2E	Small proline-rich protein 2E OS=Homo sapiens OX=9606 GN=SPRR2E PE=2 SV=2	0	12.853	79	4	10	1	72	7.9	8.31	25.69	0	1	6.40245e+06	High
Q9NZT1	Calmodulin-like protein 5	CALML5	Calmodulin-like protein 5 OS=Homo sapiens OX=9606 GN=CALML5 PE=1 SV=2	0	12.754	16	3	8	3	146	15.9	4.44	16.46	0	1	199166123	High
Q6ZVX7	F-box only protein 50	NCCRP1	F-box only protein 50 OS=Homo sapiens OX=9606 GN=NCCRP1 PE=1 SV=1	0	12.519	8	2	6	2	275	30.8	6.62	18.74	0	1	3.11315e+07	High
P22532	Small proline-rich protein 2D	SPRR2D	Small proline-rich protein 2D OS=Homo sapiens OX=9606 GN=SPRR2D PE=2 SV=2	0	12.403	67	4	11	1	72	7.9	8.37	26.97	3	1	149047480	High
P16403	Histone H1.2	H1-2	Histone H1.2 OS=Homo sapiens OX=9606 GN=H1-2 PE=1 SV=2	0	12.318	19	4	7	4	213	21.4	10.93	12.96	0	1	2.0117e+07	High
P02787	Serotransferrin	TF	Serotransferrin OS=Homo sapiens OX=9606 GN=TF PE=1 SV=4	0	12.229	6	4	4	4	698	77	7.12	9.57	0	1	7.31713e+06	High
P25311	Zinc-alpha-2-glycoprotein	AZGP1	Zinc-alpha-2-glycoprotein OS=Homo sapiens OX=9606 GN=AZGP1 PE=1 SV=2	0	12.16	12	3	4	3	298	34.2	6.05	10.74	0	1	33240516	High
P35580	Myosin-10	MYH10	Myosin-10 OS=Homo sapiens OX=9606 GN=MYH10 PE=1 SV=3	0	12.159	4	5	5	3	1976	228.9	5.54	6.7	0	1	3.01932e+06	High
P16989	Y-box-binding protein 3	YBX3	Y-box-binding protein 3 OS=Homo sapiens OX=9606 GN=YBX3 PE=1 SV=4	0	12.07	11	3	6	2	372	40.1	9.77	14.52	0	1	3.342e+06	High
P06733	Alpha-enolase	ENO1	Alpha-enolase OS=Homo sapiens OX=9606 GN=ENO1 PE=1 SV=2	0	11.925	9	4	8	4	434	47.1	7.39	15.2	0	1	47132941	High
Q05639	Elongation factor 1-alpha 2	EEF1A2	Elongation factor 1-alpha 2 OS=Homo sapiens OX=9606 GN=EEF1A2 PE=1 SV=1	0	11.631	8	4	9	4	463	50.4	9.03	20.61	0	1	8.21432e+07	High
P25705	ATP synthase subunit alpha, mitochondrial	ATP5F1A	ATP synthase subunit alpha, mitochondrial OS=Homo sapiens OX=9606 GN=ATP5F1A PE=1 SV=1	0	11.525	8	4	7	4	553	59.7	9.13	15.17	0	1	1.41157e+07	High
Q96P63	Serpin B12	SERPINB12	Serpin B12 OS=Homo sapiens OX=9606 GN=SERPINB12 PE=1 SV=1	0	11.521	9	4	7	4	405	46.2	5.53	17.55	0	1	2.99071e+07	High
P35326	Small proline-rich protein 2A	SPRR2A	Small proline-rich protein 2A OS=Homo sapiens OX=9606 GN=SPRR2A PE=1 SV=1	0	11.195	79	4	10	1	72	8	8.43	21.27	0	1	2967415	High
O75342	Arachidonate 12-lipoxygenase, 12R-type	ALOX12B	Arachidonate 12-lipoxygenase, 12R-type OS=Homo sapiens OX=9606 GN=ALOX12B PE=1 SV=1	0	11.126	6	4	6	4	701	80.3	7.64	10.03	0	1	1.81289e+07	High
P13639	Elongation factor 2	EEF2	Elongation factor 2 OS=Homo sapiens OX=9606 GN=EEF2 PE=1 SV=4	0	10.971	6	5	8	5	858	95.3	6.83	8.81	0	1	6.34695e+06	High
P19971	Thymidine phosphorylase	TYMP	Thymidine phosphorylase OS=Homo sapiens OX=9606 GN=TYMP PE=1 SV=2	0	10.931	8	3	3	3	482	49.9	5.53	6.78	0	1	6.16215e+06	High
Q8NC51	Plasminogen activator inhibitor 1 RNA-binding protein	SERBP1	Plasminogen activator inhibitor 1 RNA-binding protein OS=Homo sapiens OX=9606 GN=SERBP1 PE=1 SV=2	0	10.709	9	3	3	3	408	44.9	8.65	6.69	0	1	5.33445e+06	High
P25398	40S ribosomal protein S12	RPS12	40S ribosomal protein S12 OS=Homo sapiens OX=9606 GN=RPS12 PE=1 SV=3	0	10.58	17	1	1	1	132	14.5	7.21	4.3	0	1	156346	High
P04406	Glyceraldehyde-3-phosphate dehydrogenase	GAPDH	Glyceraldehyde-3-phosphate dehydrogenase OS=Homo sapiens OX=9606 GN=GAPDH PE=1 SV=3	0	10.543	15	4	6	4	335	36	8.46	12.41	0	1	36524535	High
Q9C075	Keratin, type I cytoskeletal 23	KRT23	Keratin, type I cytoskeletal 23 OS=Homo sapiens OX=9606 GN=KRT23 PE=1 SV=2	0	10.333	12	4	6	4	422	48.1	6.54	11.56	0	1	5.88943e+06	High
P14618	Pyruvate kinase PKM	PKM	Pyruvate kinase PKM OS=Homo sapiens OX=9606 GN=PKM PE=1 SV=4	0	10.117	9	5	11	5	531	57.9	7.84	14.65	0	1	18569170	High
P27482	Calmodulin-like protein 3	CALML3	Calmodulin-like protein 3 OS=Homo sapiens OX=9606 GN=CALML3 PE=1 SV=2	0	9.917	30	4	5	4	149	16.9	4.42	7.99	0	1	1.67054e+07	High
P18206	Vinculin	VCL	Vinculin OS=Homo sapiens OX=9606 GN=VCL PE=1 SV=4	0	9.907	4	4	6	4	1134	123.7	5.66	11.58	0	1	4.85641e+06	High
P04792	Heat shock protein beta-1	HSPB1	Heat shock protein beta-1 OS=Homo sapiens OX=9606 GN=HSPB1 PE=1 SV=2	0	9.715	15	3	7	3	205	22.8	6.4	13.39	0	1	34451255	High
Q92504	Zinc transporter SLC39A7	SLC39A7	Zinc transporter SLC39A7 OS=Homo sapiens OX=9606 GN=SLC39A7 PE=1 SV=2	0	9.438	3	2	4	2	469	50.1	6.87	7.79	0	1	2.03975e+07	High
P02545	Prelamin-A/C	LMNA	Prelamin-A/C OS=Homo sapiens OX=9606 GN=LMNA PE=1 SV=1	0	9.323	8	5	8	5	664	74.1	7.02	15.71	0	1	4.69344e+07	High
P23490	Loricrin	LORICRIN	Loricrin OS=Homo sapiens OX=9606 GN=LORICRIN PE=1 SV=2	0	9	4	2	9	2	312	25.7	8.09	21.9	0	1	1.22587e+07	High
P22528	Cornifin-B	SPRR1B	Cornifin-B OS=Homo sapiens OX=9606 GN=SPRR1B PE=1 SV=2	0	8.955	44	3	6	1	89	9.9	8.48	7.05	2	1	87067123	High
P01859	Immunoglobulin heavy constant gamma 2	IGHG2	Immunoglobulin heavy constant gamma 2 OS=Homo sapiens OX=9606 GN=IGHG2 PE=1 SV=2	0	8.741	11	3	13	2	326	35.9	7.59	28.92	1	1	2.15207e+07	High
P11021	Endoplasmic reticulum chaperone BiP	HSPA5	Endoplasmic reticulum chaperone BiP OS=Homo sapiens OX=9606 GN=HSPA5 PE=1 SV=2	0	8.724	7	4	5	3	654	72.3	5.16	8.76	0	1	8.06113e+06	High
P08238	Heat shock protein HSP 90-beta	HSP90AB1	Heat shock protein HSP 90-beta OS=Homo sapiens OX=9606 GN=HSP90AB1 PE=1 SV=4	0	8.686	5	3	4	2	724	83.2	5.03	8.3	1	1	2.69805e+06	High
Q06830	Peroxiredoxin-1	PRDX1	Peroxiredoxin-1 OS=Homo sapiens OX=9606 GN=PRDX1 PE=1 SV=1	0	8.515	16	3	4	2	199	22.1	8.13	10.49	0	1	18892072	High
Q96FQ6	Protein S100-A16	S100A16	Protein S100-A16 OS=Homo sapiens OX=9606 GN=S100A16 PE=1 SV=1	0	8.459	23	2	4	2	103	11.8	6.79	12.16	0	1	1.22852e+07	High
P35321	Cornifin-A	SPRR1A	Cornifin-A OS=Homo sapiens OX=9606 GN=SPRR1A PE=1 SV=2	0	8.376	53	3	6	1	89	9.9	8.48	9.43	0	1	5912286	High
P32119	Peroxiredoxin-2	PRDX2	Peroxiredoxin-2 OS=Homo sapiens OX=9606 GN=PRDX2 PE=1 SV=5	0	8.322	15	3	8	2	198	21.9	5.97	21.33	1	1	32248094	High
O75635	Serpin B7	SERPINB7	Serpin B7 OS=Homo sapiens OX=9606 GN=SERPINB7 PE=1 SV=1	0	8.17	6	2	2	2	380	42.9	6.8	5.89	0	1	4056902	High
P05090	Apolipoprotein D	APOD	Apolipoprotein D OS=Homo sapiens OX=9606 GN=APOD PE=1 SV=1	0	8.061	19	3	5	3	189	21.3	5.15	8.88	0	1	5.6327e+06	High
P04083	Annexin A1	ANXA1	Annexin A1 OS=Homo sapiens OX=9606 GN=ANXA1 PE=1 SV=2	0	8.054	8	2	2	2	346	38.7	7.02	5.58	0	1	4207168	High
P06576	ATP synthase subunit beta, mitochondrial	ATP5F1B	ATP synthase subunit beta, mitochondrial OS=Homo sapiens OX=9606 GN=ATP5F1B PE=1 SV=3	0	7.851	8	4	6	4	529	56.5	5.4	13.4	0	1	5.43145e+06	High
O75874	Isocitrate dehydrogenase [NADP] cytoplasmic	IDH1	Isocitrate dehydrogenase [NADP] cytoplasmic OS=Homo sapiens OX=9606 GN=IDH1 PE=1 SV=2	0	7.851	6	2	2	2	414	46.6	7.01	5.93	0	1	4.28192e+06	High
P38919	Eukaryotic initiation factor 4A-III	EIF4A3	Eukaryotic initiation factor 4A-III OS=Homo sapiens OX=9606 GN=EIF4A3 PE=1 SV=4	0	7.761	8	3	5	2	411	46.8	6.73	11.46	0	1	8.18137e+06	High
P35030	Trypsin-3	PRSS3	Trypsin-3 OS=Homo sapiens OX=9606 GN=PRSS3 PE=1 SV=2	0	7.406	4	1	2	1	304	32.5	7.49	4.9	0	1	2.58606e+07	High
Q92804	TATA-binding protein-associated factor 2N	TAF15	TATA-binding protein-associated factor 2N OS=Homo sapiens OX=9606 GN=TAF15 PE=1 SV=1	0	7.401	3	2	3	2	592	61.8	8.02	3.86	0	1	2946094	High
P62805	Histone H4	H4C16	Histone H4 OS=Homo sapiens OX=9606 GN=H4C16 PE=1 SV=2	0	7.271	31	3	5	3	103	11.4	11.36	7.99	0	1	1.84996e+07	High
P0DPH8	Tubulin alpha-3D chain	TUBA3D	Tubulin alpha-3D chain OS=Homo sapiens OX=9606 GN=TUBA3D PE=1 SV=1	0	7.147	7	3	6	3	450	49.9	5.1	13.02	0	1	3.28833e+07	High
P61158	Actin-related protein 3	ACTR3	Actin-related protein 3 OS=Homo sapiens OX=9606 GN=ACTR3 PE=1 SV=3	0	6.997	11	4	4	4	418	47.3	5.88	8.44	0	1	9.88235e+06	High
P01857	Immunoglobulin heavy constant gamma 1	IGHG1	Immunoglobulin heavy constant gamma 1 OS=Homo sapiens OX=9606 GN=IGHG1 PE=1 SV=1	0	6.903	7	2	10	1	330	36.1	8.19	23.12	0	1	22631474	High
P28074	Proteasome subunit beta type-5	PSMB5	Proteasome subunit beta type-5 OS=Homo sapiens OX=9606 GN=PSMB5 PE=1 SV=3	0	6.542	8	2	3	2	263	28.5	6.92	5.22	0	1	4.24012e+06	High
P36578	60S ribosomal protein L4	RPL4	60S ribosomal protein L4 OS=Homo sapiens OX=9606 GN=RPL4 PE=1 SV=5	0	6.53	7	3	5	3	427	47.7	11.06	8.1	0	1	21642275	High
Q15517	Corneodesmosin	CDSN	Corneodesmosin OS=Homo sapiens OX=9606 GN=CDSN PE=1 SV=3	0	6.472	5	2	3	2	529	51.5	8.35	5.59	0	1	9.46737e+06	High
P07384	Calpain-1 catalytic subunit	CAPN1	Calpain-1 catalytic subunit OS=Homo sapiens OX=9606 GN=CAPN1 PE=1 SV=1	0	6.44	4	3	3	3	714	81.8	5.67	4.01	0	1	4.38949e+06	High
Q14978	Nucleolar and coiled-body phosphoprotein 1	NOLC1	Nucleolar and coiled-body phosphoprotein 1 OS=Homo sapiens OX=9606 GN=NOLC1 PE=1 SV=2	0	6.284	4	2	2	2	699	73.6	9.47	5.34	0	1	4.87264e+06	High
Q13867	Bleomycin hydrolase	BLMH	Bleomycin hydrolase OS=Homo sapiens OX=9606 GN=BLMH PE=1 SV=1	0	6.201	5	2	2	2	455	52.5	6.27	2.75	0	1	4.08354e+06	High
P01040	Cystatin-A	CSTA	Cystatin-A OS=Homo sapiens OX=9606 GN=CSTA PE=1 SV=1	0	6.186	24	3	5	3	98	11	5.5	9.24	0	1	3.79507e+07	High
Q5TA76	Late cornified envelope protein 3A	LCE3A	Late cornified envelope protein 3A OS=Homo sapiens OX=9606 GN=LCE3A PE=1 SV=1	0	6.113	26	2	3	2	89	9.1	8.37	2.37	0	1	4.58264e+06	High
P07858	Cathepsin B	CTSB	Cathepsin B OS=Homo sapiens OX=9606 GN=CTSB PE=1 SV=3	0	6.066	9	3	5	3	339	37.8	6.3	3.41	0	1	9.9009e+06	High
P23396	40S ribosomal protein S3	RPS3	40S ribosomal protein S3 OS=Homo sapiens OX=9606 GN=RPS3 PE=1 SV=2	0	6.001	9	2	2	2	243	26.7	9.66	4.43	0	1	1.37197e+06	High
P02679	Fibrinogen gamma chain	FGG	Fibrinogen gamma chain OS=Homo sapiens OX=9606 GN=FGG PE=1 SV=3	0	5.814	7	3	4	3	453	51.5	5.62	3.84	0	1	1.09494e+07	High
P31946	14-3-3 protein beta/alpha	YWHAB	14-3-3 protein beta/alpha OS=Homo sapiens OX=9606 GN=YWHAB PE=1 SV=3	0	5.811	13	3	3	1	246	28.1	4.83	2.26	0	1	0	High
P01876	Immunoglobulin heavy constant alpha 1	IGHA1	Immunoglobulin heavy constant alpha 1 OS=Homo sapiens OX=9606 GN=IGHA1 PE=1 SV=2	0	5.809	5	2	5	2	353	37.6	6.51	12.95	0	1	2.14859e+07	High
P07900	Heat shock protein HSP 90-alpha	HSP90AA1	Heat shock protein HSP 90-alpha OS=Homo sapiens OX=9606 GN=HSP90AA1 PE=1 SV=5	0	5.76	3	2	4	1	732	84.6	5.02	6.42	0	1	23627790	High
P31151	Protein S100-A7	S100A7	Protein S100-A7 OS=Homo sapiens OX=9606 GN=S100A7 PE=1 SV=4	0	5.718	24	2	2	2	101	11.5	6.77	3.2	0	1	9.07408e+06	High
O14556	Glyceraldehyde-3-phosphate dehydrogenase, testis-specific	GAPDHS	Glyceraldehyde-3-phosphate dehydrogenase, testis-specific OS=Homo sapiens OX=9606 GN=GAPDHS PE=1 SV=2	0	5.71	3	1	5	1	408	44.5	8.19	12.97	0	1	1.28754e+07	High
Q9GZZ8	Extracellular glycoprotein lacritin	LACRT	Extracellular glycoprotein lacritin OS=Homo sapiens OX=9606 GN=LACRT PE=1 SV=1	0	5.676	9	1	2	1	138	14.2	5.5	2.9	0	1	4.86151e+06	High
P29373	Cellular retinoic acid-binding protein 2	CRABP2	Cellular retinoic acid-binding protein 2 OS=Homo sapiens OX=9606 GN=CRABP2 PE=1 SV=2	0	5.663	18	2	2	2	138	15.7	5.4	3.57	0	1	2.42737e+06	High
P26641	Elongation factor 1-gamma	EEF1G	Elongation factor 1-gamma OS=Homo sapiens OX=9606 GN=EEF1G PE=1 SV=3	0	5.645	3	1	2	1	437	50.1	6.67	4.83	0	1	2.74615e+06	High
Q09666	Neuroblast differentiation-associated protein AHNAK	AHNAK	Neuroblast differentiation-associated protein AHNAK OS=Homo sapiens OX=9606 GN=AHNAK PE=1 SV=2	0	5.526	2	3	3	3	5890	628.7	6.15	4.4	0	1	5.80834e+06	High
P36952	Serpin B5	SERPINB5	Serpin B5 OS=Homo sapiens OX=9606 GN=SERPINB5 PE=1 SV=2	0	5.508	8	3	3	3	375	42.1	6.05	3.93	0	1	8.08141e+06	High
P05455	Lupus La protein	SSB	Lupus La protein OS=Homo sapiens OX=9606 GN=SSB PE=1 SV=2	0	5.506	5	2	2	2	408	46.8	7.12	0	0	1	3.07015e+06	High
Q8NEX9	Short-chain dehydrogenase/reductase family 9C member 7	SDR9C7	Short-chain dehydrogenase/reductase family 9C member 7 OS=Homo sapiens OX=9606 GN=SDR9C7 PE=1 SV=1	0	5.298	9	3	4	3	313	35.2	9.16	5.83	0	1	3.55041e+06	High
Q92817	Envoplakin	EVPL	Envoplakin OS=Homo sapiens OX=9606 GN=EVPL PE=1 SV=3	0	5.265	1	2	2	2	2033	231.5	6.96	4.49	0	1	2180840	High
P05783	Keratin, type I cytoskeletal 18	KRT18	Keratin, type I cytoskeletal 18 OS=Homo sapiens OX=9606 GN=KRT18 PE=1 SV=2	0	5.211	5	2	3	2	430	48	5.45	7.17	0	1	2.83842e+06	High
P52907	F-actin-capping protein subunit alpha-1	CAPZA1	F-actin-capping protein subunit alpha-1 OS=Homo sapiens OX=9606 GN=CAPZA1 PE=1 SV=3	0	5.128	6	1	1	1	286	32.9	5.69	3.21	0	1	0	High
P49189	4-trimethylaminobutyraldehyde dehydrogenase	ALDH9A1	4-trimethylaminobutyraldehyde dehydrogenase OS=Homo sapiens OX=9606 GN=ALDH9A1 PE=1 SV=3	0	5.059	4	2	5	2	494	53.8	5.87	5.84	0	1	2931676	High
P59665	Neutrophil defensin 1	DEFA1B	Neutrophil defensin 1 OS=Homo sapiens OX=9606 GN=DEFA1B PE=1 SV=1	0	5.015	19	2	5	2	94	10.2	6.99	12.45	0	1	53709368	High
A0A087WW87	Immunoglobulin kappa variable 2-40	IGKV2-40	Immunoglobulin kappa variable 2-40 OS=Homo sapiens OX=9606 GN=IGKV2-40 PE=3 SV=2	0	4.999	11	1	2	1	121	13.3	4.61	4.6	0	1	52311944	High
P23526	Adenosylhomocysteinase	AHCY	Adenosylhomocysteinase OS=Homo sapiens OX=9606 GN=AHCY PE=1 SV=4	0	4.919	5	2	2	2	432	47.7	6.34	2.97	0	1	2.37891e+06	High
P80188	Neutrophil gelatinase-associated lipocalin	LCN2	Neutrophil gelatinase-associated lipocalin OS=Homo sapiens OX=9606 GN=LCN2 PE=1 SV=2	0	4.815	8	1	1	1	198	22.6	8.91	2.95	0	1	1.31987e+06	High
Q6E0U4	Dermokine	DMKN	Dermokine OS=Homo sapiens OX=9606 GN=DMKN PE=1 SV=3	0	4.812	4	1	1	1	476	47.1	7.28	2.43	0	1	1.17677e+06	High
P63104	14-3-3 protein zeta/delta	YWHAZ	14-3-3 protein zeta/delta OS=Homo sapiens OX=9606 GN=YWHAZ PE=1 SV=1	0	4.729	12	3	4	1	245	27.7	4.79	2.26	1	1	4.28381e+06	High
Q15287	RNA-binding protein with serine-rich domain 1	RNPS1	RNA-binding protein with serine-rich domain 1 OS=Homo sapiens OX=9606 GN=RNPS1 PE=1 SV=1	0	4.705	3	1	15	1	305	34.2	11.84	27.9	0	1	1.32828e+08	High
Q99832	T-complex protein 1 subunit eta	CCT7	T-complex protein 1 subunit eta OS=Homo sapiens OX=9606 GN=CCT7 PE=1 SV=2	0	4.511	3	2	3	2	543	59.3	7.65	3.84	0	1	2.73701e+06	High
P11279	Lysosome-associated membrane glycoprotein 1	LAMP1	Lysosome-associated membrane glycoprotein 1 OS=Homo sapiens OX=9606 GN=LAMP1 PE=1 SV=3	0	4.414	5	2	2	2	417	44.9	8.75	4.83	0	1	6.84284e+06	High
O95218	Zinc finger Ran-binding domain-containing protein 2	ZRANB2	Zinc finger Ran-binding domain-containing protein 2 OS=Homo sapiens OX=9606 GN=ZRANB2 PE=1 SV=2	0	4.32	5	1	1	1	330	37.4	10.01	2.48	0	1	807769	High
P53597	Succinate--CoA ligase [ADP/GDP-forming] subunit alpha, mitochondrial	SUCLG1	Succinate--CoA ligase [ADP/GDP-forming] subunit alpha, mitochondrial OS=Homo sapiens OX=9606 GN=SUCLG1 PE=1 SV=4	0	4.305	3	1	1	1	346	36.2	8.79	2.99	0	1	6.59633e+06	High
P10599	Thioredoxin	TXN	Thioredoxin OS=Homo sapiens OX=9606 GN=TXN PE=1 SV=3	0	4.249	21	2	2	2	105	11.7	4.92	2.34	0	1	3.88374e+07	High
Q9BQ50	Three prime repair exonuclease 2	TREX2	Three prime repair exonuclease 2 OS=Homo sapiens OX=9606 GN=TREX2 PE=1 SV=2	0	4.086	10	2	2	2	236	25.9	6.06	3.01	0	1	1.15347e+07	High
P12268	Inosine-5'-monophosphate dehydrogenase 2	IMPDH2	Inosine-5'-monophosphate dehydrogenase 2 OS=Homo sapiens OX=9606 GN=IMPDH2 PE=1 SV=2	0	4.037	2	1	1	1	514	55.8	6.9	2.73	0	1	3.70131e+06	High
P49862	Kallikrein-7	KLK7	Kallikrein-7 OS=Homo sapiens OX=9606 GN=KLK7 PE=1 SV=1	0	4.012	6	1	1	1	253	27.5	8.47	2.76	0	1	0	High
P58107	Epiplakin	EPPK1	Epiplakin OS=Homo sapiens OX=9606 GN=EPPK1 PE=1 SV=3	0	3.979	2	2	4	2	5088	555.3	5.62	6.28	0	1	2.43228e+07	High
P01024	Complement C3	C3	Complement C3 OS=Homo sapiens OX=9606 GN=C3 PE=1 SV=2	0	3.959	1	2	2	2	1663	187	6.4	2.14	0	1	1.18994e+06	High
P25815	Protein S100-P	S100P	Protein S100-P OS=Homo sapiens OX=9606 GN=S100P PE=1 SV=2	0	3.869	14	1	1	1	95	10.4	4.88	2.04	0	1	1.33061e+06	High
Q8WWY7	WAP four-disulfide core domain protein 12	WFDC12	WAP four-disulfide core domain protein 12 OS=Homo sapiens OX=9606 GN=WFDC12 PE=1 SV=1	0	3.841	14	1	1	1	111	12	5.5	2.43	0	1	0	High
P31025	Lipocalin-1	LCN1	Lipocalin-1 OS=Homo sapiens OX=9606 GN=LCN1 PE=1 SV=1	0	3.823	6	1	2	1	176	19.2	5.58	4.28	0	1	2492762	High
P28072	Proteasome subunit beta type-6	PSMB6	Proteasome subunit beta type-6 OS=Homo sapiens OX=9606 GN=PSMB6 PE=1 SV=4	0	3.801	9	2	3	2	239	25.3	4.92	6.63	0	1	4484063	High
P02766	Transthyretin	TTR	Transthyretin OS=Homo sapiens OX=9606 GN=TTR PE=1 SV=1	0	3.709	9	1	1	1	147	15.9	5.76	0	0	1	745264	High
Q9UQ35	Serine/arginine repetitive matrix protein 2	SRRM2	Serine/arginine repetitive matrix protein 2 OS=Homo sapiens OX=9606 GN=SRRM2 PE=1 SV=2	0	3.693	1	2	2	2	2752	299.4	12.06	4.12	0	1	3.24479e+06	High
Q8IW75	Serpin A12	SERPINA12	Serpin A12 OS=Homo sapiens OX=9606 GN=SERPINA12 PE=1 SV=1	0	3.692	5	2	2	2	414	47.1	9.29	1.8	0	1	3.22844e+06	High
P00441	Superoxide dismutase [Cu-Zn]	SOD1	Superoxide dismutase [Cu-Zn] OS=Homo sapiens OX=9606 GN=SOD1 PE=1 SV=2	0	3.653	8	1	1	1	154	15.9	6.13	2.12	0	1	3197857	High
O00571	ATP-dependent RNA helicase DDX3X	DDX3X	ATP-dependent RNA helicase DDX3X OS=Homo sapiens OX=9606 GN=DDX3X PE=1 SV=3	0	3.648	2	1	1	1	662	73.2	7.18	2.82	0	1	3050848	High
P01833	Polymeric immunoglobulin receptor	PIGR	Polymeric immunoglobulin receptor OS=Homo sapiens OX=9606 GN=PIGR PE=1 SV=4	0	3.565	3	2	3	2	764	83.2	5.74	5.94	0	1	3.0854e+06	High
P47756	F-actin-capping protein subunit beta	CAPZB	F-actin-capping protein subunit beta OS=Homo sapiens OX=9606 GN=CAPZB PE=1 SV=5	0	3.547	9	2	2	2	272	30.6	6	3.75	0	1	3.02282e+06	High
P08246	Neutrophil elastase	ELANE	Neutrophil elastase OS=Homo sapiens OX=9606 GN=ELANE PE=1 SV=1	0	3.51	4	1	2	1	267	28.5	9.35	1.77	0	1	2.72484e+06	High
Q9UGM3	Deleted in malignant brain tumors 1 protein	DMBT1	Deleted in malignant brain tumors 1 protein OS=Homo sapiens OX=9606 GN=DMBT1 PE=1 SV=2	0	3.502	7	1	1	1	2413	260.6	5.44	2.13	0	1	366463	High
P00738	Haptoglobin	HP	Haptoglobin OS=Homo sapiens OX=9606 GN=HP PE=1 SV=1	0	3.486	5	2	2	2	406	45.2	6.58	3.88	0	1	4724882	High
P43490	Nicotinamide phosphoribosyltransferase	NAMPT	Nicotinamide phosphoribosyltransferase OS=Homo sapiens OX=9606 GN=NAMPT PE=1 SV=1	0	3.451	2	1	1	1	491	55.5	7.15	2.36	0	1	1.4573e+06	High
Q9NQ38	Serine protease inhibitor Kazal-type 5	SPINK5	Serine protease inhibitor Kazal-type 5 OS=Homo sapiens OX=9606 GN=SPINK5 PE=1 SV=2	0	3.449	1	1	2	1	1064	120.6	8.06	1.78	0	1	795914	High
P15531	Nucleoside diphosphate kinase A	NME1	Nucleoside diphosphate kinase A OS=Homo sapiens OX=9606 GN=NME1 PE=1 SV=1	0	3.449	19	2	2	2	152	17.1	6.19	2.68	0	1	683718	High
P10619	Lysosomal protective protein	CTSA	Lysosomal protective protein OS=Homo sapiens OX=9606 GN=CTSA PE=1 SV=2	0	3.416	3	1	2	1	480	54.4	6.61	3.55	0	1	1493131	High
O76031	ATP-dependent Clp protease ATP-binding subunit clpX-like, mitochondrial	CLPX	ATP-dependent Clp protease ATP-binding subunit clpX-like, mitochondrial OS=Homo sapiens OX=9606 GN=CLPX PE=1 SV=2	0	3.37	2	1	2	1	633	69.2	7.58	4.7	0	1	3.7963e+06	High
P26599	Polypyrimidine tract-binding protein 1	PTBP1	Polypyrimidine tract-binding protein 1 OS=Homo sapiens OX=9606 GN=PTBP1 PE=1 SV=2	0	3.329	3	2	2	2	557	59.6	9.16	1.62	0	1	3.05509e+06	High
Q15828	Cystatin-M	CST6	Cystatin-M OS=Homo sapiens OX=9606 GN=CST6 PE=1 SV=1	0	3.31	14	2	2	2	149	16.5	8.09	3.52	0	1	11827686	High
Q9GZL7	Ribosome biogenesis protein WDR12	WDR12	Ribosome biogenesis protein WDR12 OS=Homo sapiens OX=9606 GN=WDR12 PE=1 SV=2	0	3.27	4	2	4	2	423	47.7	5.9	6.76	0	1	4448411	High
Q9H0S4	Probable ATP-dependent RNA helicase DDX47	DDX47	Probable ATP-dependent RNA helicase DDX47 OS=Homo sapiens OX=9606 GN=DDX47 PE=1 SV=1	0	3.262	3	1	1	1	455	50.6	9.1	1.93	0	1	966556	High
O75131	Copine-3	CPNE3	Copine-3 OS=Homo sapiens OX=9606 GN=CPNE3 PE=1 SV=1	0	3.232	2	1	1	1	537	60.1	5.85	1.97	0	1	1076497	High
Q96G03	Phosphopentomutase	PGM2	Phosphopentomutase OS=Homo sapiens OX=9606 GN=PGM2 PE=1 SV=4	0	3.193	3	2	2	2	612	68.2	6.73	1.66	0	1	2.37123e+06	High
P62987	Ubiquitin-60S ribosomal protein L40	UBA52	Ubiquitin-60S ribosomal protein L40 OS=Homo sapiens OX=9606 GN=UBA52 PE=1 SV=2	0	3.182	7	1	5	1	128	14.7	9.83	8.84	0	1	21076672	High
P55209	Nucleosome assembly protein 1-like 1	NAP1L1	Nucleosome assembly protein 1-like 1 OS=Homo sapiens OX=9606 GN=NAP1L1 PE=1 SV=1	0	3.092	3	1	1	1	391	45.3	4.46	2.57	0	1	1138131	High
P42357	Histidine ammonia-lyase	HAL	Histidine ammonia-lyase OS=Homo sapiens OX=9606 GN=HAL PE=1 SV=1	0	3.081	3	2	2	2	657	72.7	6.95	2.62	0	1	2.69689e+06	High
Q96L46	Calpain small subunit 2	CAPNS2	Calpain small subunit 2 OS=Homo sapiens OX=9606 GN=CAPNS2 PE=1 SV=2	0	3.054	4	1	1	1	248	27.6	5.73	3.1	0	1	908796	High
P55072	Transitional endoplasmic reticulum ATPase	VCP	Transitional endoplasmic reticulum ATPase OS=Homo sapiens OX=9606 GN=VCP PE=1 SV=4	0	3.049	2	2	3	2	806	89.3	5.26	4.21	0	1	211480	High
P13929	Beta-enolase	ENO3	Beta-enolase OS=Homo sapiens OX=9606 GN=ENO3 PE=1 SV=5	0	3.034	3	1	1	1	434	47	7.71	1.93	0	1	1.2486e+06	High
Q99735	Microsomal glutathione S-transferase 2	MGST2	Microsomal glutathione S-transferase 2 OS=Homo sapiens OX=9606 GN=MGST2 PE=1 SV=1	0	3.026	10	1	1	1	147	16.6	9.55	2.08	0	1	1.92217e+06	High
P01011	Alpha-1-antichymotrypsin	SERPINA3	Alpha-1-antichymotrypsin OS=Homo sapiens OX=9606 GN=SERPINA3 PE=1 SV=2	0	3.022	5	2	2	2	423	47.6	5.52	4.08	0	1	5.27393e+06	High
P09525	Annexin A4	ANXA4	Annexin A4 OS=Homo sapiens OX=9606 GN=ANXA4 PE=1 SV=4	0	3.007	3	1	1	1	319	35.9	6.13	2.13	0	1	1.5628e+06	High
Q9NSB4	Keratin, type II cuticular Hb2	KRT82	Keratin, type II cuticular Hb2 OS=Homo sapiens OX=9606 GN=KRT82 PE=1 SV=3	0	2.995	2	2	2	2	513	56.6	6.74	5.81	0	1	5.78102e+08	High
O60437	Periplakin	PPL	Periplakin OS=Homo sapiens OX=9606 GN=PPL PE=1 SV=4	0	2.994	1	1	1	1	1756	204.6	5.6	2.9	0	1	0	High
Q9NZH8	Interleukin-36 gamma	IL36G	Interleukin-36 gamma OS=Homo sapiens OX=9606 GN=IL36G PE=1 SV=1	0	2.987	6	1	2	1	169	18.7	5.14	3.87	0	1	2924928	High
Q16610	Extracellular matrix protein 1	ECM1	Extracellular matrix protein 1 OS=Homo sapiens OX=9606 GN=ECM1 PE=1 SV=2	0	2.828	2	1	2	1	540	60.6	6.71	1.77	0	1	3.731e+06	High
P30101	Protein disulfide-isomerase A3	PDIA3	Protein disulfide-isomerase A3 OS=Homo sapiens OX=9606 GN=PDIA3 PE=1 SV=4	0	2.824	4	2	2	2	505	56.7	6.35	2.15	0	1	2.41471e+06	High
P39023	60S ribosomal protein L3	RPL3	60S ribosomal protein L3 OS=Homo sapiens OX=9606 GN=RPL3 PE=1 SV=2	0	2.823	3	1	2	1	403	46.1	10.18	2.15	0	1	1.43198e+06	High
P63244	Receptor of activated protein C kinase 1	RACK1	Receptor of activated protein C kinase 1 OS=Homo sapiens OX=9606 GN=RACK1 PE=1 SV=3	0	2.79	3	1	2	1	317	35.1	7.69	4.52	0	1	3647216	High
O60911	Cathepsin L2	CTSV	Cathepsin L2 OS=Homo sapiens OX=9606 GN=CTSV PE=1 SV=2	0	2.782	4	1	2	1	334	37.3	8.76	5.04	0	1	2.01331e+06	High
P04843	Dolichyl-diphosphooligosaccharide--protein glycosyltransferase subunit 1	RPN1	Dolichyl-diphosphooligosaccharide--protein glycosyltransferase subunit 1 OS=Homo sapiens OX=9606 GN=RPN1 PE=1 SV=1	0	2.777	2	1	1	1	607	68.5	6.38	1.82	0	1	746332	High
P03973	Antileukoproteinase	SLPI	Antileukoproteinase OS=Homo sapiens OX=9606 GN=SLPI PE=1 SV=2	0	2.756	9	1	1	1	132	14.3	8.75	2.7	0	1	1.90467e+06	High
Q16643	Drebrin	DBN1	Drebrin OS=Homo sapiens OX=9606 GN=DBN1 PE=1 SV=4	0	2.753	4	1	1	1	649	71.4	4.45	2.23	0	1	21077.9	High
Q9UJ70	N-acetyl-D-glucosamine kinase	NAGK	N-acetyl-D-glucosamine kinase OS=Homo sapiens OX=9606 GN=NAGK PE=1 SV=4	0	2.702	4	1	1	1	344	37.4	6.24	1.78	0	1	1.51375e+06	High
Q96FJ2	Dynein light chain 2, cytoplasmic	DYNLL2	Dynein light chain 2, cytoplasmic OS=Homo sapiens OX=9606 GN=DYNLL2 PE=1 SV=1	0	2.662	12	1	1	1	89	10.3	7.37	2.44	0	1	2.70546e+06	High
P11498	Pyruvate carboxylase, mitochondrial	PC	Pyruvate carboxylase, mitochondrial OS=Homo sapiens OX=9606 GN=PC PE=1 SV=2	0	2.661	1	1	1	1	1178	129.6	6.84	2.18	0	1	5912896	High
P30041	Peroxiredoxin-6	PRDX6	Peroxiredoxin-6 OS=Homo sapiens OX=9606 GN=PRDX6 PE=1 SV=3	0	2.659	6	1	1	1	224	25	6.38	2.41	0	1	830291	High
P21333	Filamin-A	FLNA	Filamin-A OS=Homo sapiens OX=9606 GN=FLNA PE=1 SV=4	0	2.591	0	1	2	1	2647	280.6	6.06	3.75	0	1	677376	High
P17900	Ganglioside GM2 activator	GM2A	Ganglioside GM2 activator OS=Homo sapiens OX=9606 GN=GM2A PE=1 SV=4	0	2.587	5	1	3	1	193	20.8	5.31	5.94	0	1	3.39712e+06	High
P62263	40S ribosomal protein S14	RPS14	40S ribosomal protein S14 OS=Homo sapiens OX=9606 GN=RPS14 PE=1 SV=3	0	2.583	7	1	1	1	151	16.3	10.05	2.48	0	1	0	High
P51648	Aldehyde dehydrogenase family 3 member A2	ALDH3A2	Aldehyde dehydrogenase family 3 member A2 OS=Homo sapiens OX=9606 GN=ALDH3A2 PE=1 SV=1	0	2.575	2	1	1	1	485	54.8	7.88	0	0	1	1.06626e+06	High
P01008	Antithrombin-III	SERPINC1	Antithrombin-III OS=Homo sapiens OX=9606 GN=SERPINC1 PE=1 SV=1	0	2.548	2	1	5	1	464	52.6	6.71	13.1	0	1	25596020	High
B9A064	Immunoglobulin lambda-like polypeptide 5	IGLL5	Immunoglobulin lambda-like polypeptide 5 OS=Homo sapiens OX=9606 GN=IGLL5 PE=2 SV=2	0	2.542	5	1	1	1	214	23	8.84	2.02	0	1	2.38726e+06	High
P15880	40S ribosomal protein S2	RPS2	40S ribosomal protein S2 OS=Homo sapiens OX=9606 GN=RPS2 PE=1 SV=2	0	2.532	4	1	1	1	293	31.3	10.24	2.27	0	1	1.99936e+06	High
P07476	Involucrin	IVL	Involucrin OS=Homo sapiens OX=9606 GN=IVL PE=1 SV=2	0	2.513	3	1	1	1	585	68.4	4.61	2.96	0	1	4.72816e+06	High
P14868	Aspartate--tRNA ligase, cytoplasmic	DARS1	Aspartate--tRNA ligase, cytoplasmic OS=Homo sapiens OX=9606 GN=DARS1 PE=1 SV=2	0	2.506	2	1	2	1	501	57.1	6.55	4.24	0	1	2.1268e+06	High
P35268	60S ribosomal protein L22	RPL22	60S ribosomal protein L22 OS=Homo sapiens OX=9606 GN=RPL22 PE=1 SV=2	0	2.343	10	1	1	1	128	14.8	9.19	2.02	0	1	724509	High
P01591	Immunoglobulin J chain	JCHAIN	Immunoglobulin J chain OS=Homo sapiens OX=9606 GN=JCHAIN PE=1 SV=4	0.003	2.299	8	1	1	1	159	18.1	5.24	0	0	1	2.77269e+06	High
O75449	Katanin p60 ATPase-containing subunit A1	KATNA1	Katanin p60 ATPase-containing subunit A1 OS=Homo sapiens OX=9606 GN=KATNA1 PE=1 SV=1	0.003	2.297	2	1	3	1	491	55.9	6.9	8.31	0	1	6717399	High
P13804	Electron transfer flavoprotein subunit alpha, mitochondrial	ETFA	Electron transfer flavoprotein subunit alpha, mitochondrial OS=Homo sapiens OX=9606 GN=ETFA PE=1 SV=1	0.003	2.289	6	1	1	1	333	35.1	8.38	1.98	0	1	3.9002e+06	High
O00204	Sulfotransferase 2B1	SULT2B1	Sulfotransferase 2B1 OS=Homo sapiens OX=9606 GN=SULT2B1 PE=1 SV=2	0.003	2.26	3	1	1	1	365	41.3	5.4	1.92	0	1	1.74591e+06	High
P04637	Cellular tumor antigen p53	TP53	Cellular tumor antigen p53 OS=Homo sapiens OX=9606 GN=TP53 PE=1 SV=4	0.003	2.258	3	1	1	1	393	43.6	6.79	1.62	0	1	804559	High
Q14574	Desmocollin-3	DSC3	Desmocollin-3 OS=Homo sapiens OX=9606 GN=DSC3 PE=1 SV=3	0.003	2.229	1	1	2	1	896	99.9	6.1	4.5	0	1	6.27438e+06	High
P84098	60S ribosomal protein L19	RPL19	60S ribosomal protein L19 OS=Homo sapiens OX=9606 GN=RPL19 PE=1 SV=1	0.003	2.205	5	1	2	1	196	23.5	11.47	4.44	0	1	4.72443e+06	High
Q07020	60S ribosomal protein L18	RPL18	60S ribosomal protein L18 OS=Homo sapiens OX=9606 GN=RPL18 PE=1 SV=2	0.003	2.179	6	1	1	1	188	21.6	11.72	2.65	0	1	1069514	High
O75223	Gamma-glutamylcyclotransferase	GGCT	Gamma-glutamylcyclotransferase OS=Homo sapiens OX=9606 GN=GGCT PE=1 SV=1	0.006	2.136	5	1	2	1	188	21	5.14	3.74	0	1	871463936	High
P50991	T-complex protein 1 subunit delta	CCT4	T-complex protein 1 subunit delta OS=Homo sapiens OX=9606 GN=CCT4 PE=1 SV=4	0.006	2.121	2	1	1	1	539	57.9	7.83	2.28	0	1	4.35226e+06	High
P12081	Histidine--tRNA ligase, cytoplasmic	HARS1	Histidine--tRNA ligase, cytoplasmic OS=Homo sapiens OX=9606 GN=HARS1 PE=1 SV=2	0.009	2.073	3	1	1	1	509	57.4	5.88	0	0	1	935229	High
O75608	Acyl-protein thioesterase 1	LYPLA1	Acyl-protein thioesterase 1 OS=Homo sapiens OX=9606 GN=LYPLA1 PE=1 SV=1	0.009	2.05	5	1	1	1	230	24.7	6.77	0	0	1	389613	High
P06753	Tropomyosin alpha-3 chain	TPM3	Tropomyosin alpha-3 chain OS=Homo sapiens OX=9606 GN=TPM3 PE=1 SV=2	0.009	2.027	3	1	1	1	285	32.9	4.72	2.15	0	1	707354	High
P61619	Protein transport protein Sec61 subunit alpha isoform 1	SEC61A1	Protein transport protein Sec61 subunit alpha isoform 1 OS=Homo sapiens OX=9606 GN=SEC61A1 PE=1 SV=2	0.009	2.017	2	1	1	1	476	52.2	8.06	2.69	0	1	1.84846e+06	High
Q9HB40	Retinoid-inducible serine carboxypeptidase	SCPEP1	Retinoid-inducible serine carboxypeptidase OS=Homo sapiens OX=9606 GN=SCPEP1 PE=1 SV=1	0.009	2.011	2	1	1	1	452	50.8	5.81	0	0	1	447070	High
P60900	Proteasome subunit alpha type-6	PSMA6	Proteasome subunit alpha type-6 OS=Homo sapiens OX=9606 GN=PSMA6 PE=1 SV=1	0.009	1.993	5	1	1	1	246	27.4	6.76	0	0	1	3196424	High
O43290	U4/U6.U5 tri-snRNP-associated protein 1	SART1	U4/U6.U5 tri-snRNP-associated protein 1 OS=Homo sapiens OX=9606 GN=SART1 PE=1 SV=1	0.009	1.973	1	1	2	1	800	90.2	6.13	4.18	0	1	1.12828e+06	High
P25788	Proteasome subunit alpha type-3	PSMA3	Proteasome subunit alpha type-3 OS=Homo sapiens OX=9606 GN=PSMA3 PE=1 SV=2	0.012	1.955	5	1	1	1	255	28.4	5.33	2.16	0	1	1.44075e+06	High
A8MQ03	Cysteine-rich tail protein 1	CYSRT1	Cysteine-rich tail protein 1 OS=Homo sapiens OX=9606 GN=CYSRT1 PE=1 SV=1	0.012	1.951	10	1	1	1	144	15.3	7.06	1.88	0	1	1.12815e+06	High
Q92841	Probable ATP-dependent RNA helicase DDX17	DDX17	Probable ATP-dependent RNA helicase DDX17 OS=Homo sapiens OX=9606 GN=DDX17 PE=1 SV=2	0.011	1.939	2	1	1	1	729	80.2	8.27	2.07	0	1	394414	High
P31327	Carbamoyl-phosphate synthase [ammonia], mitochondrial	CPS1	Carbamoyl-phosphate synthase [ammonia], mitochondrial OS=Homo sapiens OX=9606 GN=CPS1 PE=1 SV=2	0.011	1.936	1	1	3	1	1500	164.8	6.74	1.61	0	1	7648463	High
Q96DR8	Mucin-like protein 1	MUCL1	Mucin-like protein 1 OS=Homo sapiens OX=9606 GN=MUCL1 PE=1 SV=1	0.011	1.917	10	1	1	1	90	9	4.64	2.41	0	1	3.06109e+06	High
P05141	ADP/ATP translocase 2	SLC25A5	ADP/ATP translocase 2 OS=Homo sapiens OX=9606 GN=SLC25A5 PE=1 SV=7	0.011	1.916	3	1	1	1	298	32.8	9.69	0	0	1	2.01738e+06	High
P00338	L-lactate dehydrogenase A chain	LDHA	L-lactate dehydrogenase A chain OS=Homo sapiens OX=9606 GN=LDHA PE=1 SV=2	0.011	1.908	3	1	1	1	332	36.7	8.27	2.42	0	1	8.34603e+06	High
Q14134	Tripartite motif-containing protein 29	TRIM29	Tripartite motif-containing protein 29 OS=Homo sapiens OX=9606 GN=TRIM29 PE=1 SV=2	0.011	1.897	2	1	1	1	588	65.8	7.15	2.68	0	1	1.6884e+06	High
P02647	Apolipoprotein A-I	APOA1	Apolipoprotein A-I OS=Homo sapiens OX=9606 GN=APOA1 PE=1 SV=1	0.017	1.889	4	1	1	1	267	30.8	5.76	1.95	0	1	1.98204e+06	High
P38646	Stress-70 protein, mitochondrial	HSPA9	Stress-70 protein, mitochondrial OS=Homo sapiens OX=9606 GN=HSPA9 PE=1 SV=2	0.017	1.885	1	1	2	1	679	73.6	6.16	4.69	0	1	8375580	High
Q13247	Serine/arginine-rich splicing factor 6	SRSF6	Serine/arginine-rich splicing factor 6 OS=Homo sapiens OX=9606 GN=SRSF6 PE=1 SV=2	0.017	1.882	3	1	2	1	344	39.6	11.43	4.38	0	1	2.39652e+06	High
P31949	Protein S100-A11	S100A11	Protein S100-A11 OS=Homo sapiens OX=9606 GN=S100A11 PE=1 SV=2	0.017	1.87	9	1	1	1	105	11.7	7.12	2.44	0	1	10353783	High
P62241	40S ribosomal protein S8	RPS8	40S ribosomal protein S8 OS=Homo sapiens OX=9606 GN=RPS8 PE=1 SV=2	0.017	1.847	5	1	1	1	208	24.2	10.32	1.86	0	1	1.48163e+06	High
P07602	Prosaposin	PSAP	Prosaposin OS=Homo sapiens OX=9606 GN=PSAP PE=1 SV=2	0.017	1.841	2	1	2	1	524	58.1	5.17	4.81	0	1	913809	High
Q96HU8	GTP-binding protein Di-Ras2	DIRAS2	GTP-binding protein Di-Ras2 OS=Homo sapiens OX=9606 GN=DIRAS2 PE=1 SV=1	0.017	1.831	6	1	5	1	199	22.5	8.76	11.78	0	1	62203116	High
Q16778	Histone H2B type 2-E	H2BC21	Histone H2B type 2-E OS=Homo sapiens OX=9606 GN=H2BC21 PE=1 SV=3	0.016	1.816	7	1	1	1	126	13.9	10.32	0	0	1	3.24656e+06	High
P18669	Phosphoglycerate mutase 1	PGAM1	Phosphoglycerate mutase 1 OS=Homo sapiens OX=9606 GN=PGAM1 PE=1 SV=2	0.016	1.808	4	1	1	1	254	28.8	7.18	2.88	0	1	885924	High
Q13243	Serine/arginine-rich splicing factor 5	SRSF5	Serine/arginine-rich splicing factor 5 OS=Homo sapiens OX=9606 GN=SRSF5 PE=1 SV=1	0.016	1.791	4	1	1	1	272	31.2	11.59	0	0	1	482903	High
P0DP57	Secreted Ly-6/uPAR domain-containing protein 2	SLURP2	Secreted Ly-6/uPAR domain-containing protein 2 OS=Homo sapiens OX=9606 GN=SLURP2 PE=1 SV=1	0.016	1.79	13	1	1	1	97	10.2	6.62	0	0	1	726637	High
P78417	Glutathione S-transferase omega-1	GSTO1	Glutathione S-transferase omega-1 OS=Homo sapiens OX=9606 GN=GSTO1 PE=1 SV=2	0.016	1.773	6	1	1	1	241	27.5	6.6	1.86	0	1	682693	High
Q5VVQ6	Ubiquitin thioesterase OTU1	YOD1	Ubiquitin thioesterase OTU1 OS=Homo sapiens OX=9606 GN=YOD1 PE=1 SV=1	0.016	1.771	3	1	2	1	348	38.3	6.11	0	0	1	1.5287e+06	High
P43034	Platelet-activating factor acetylhydrolase IB subunit beta	PAFAH1B1	Platelet-activating factor acetylhydrolase IB subunit beta OS=Homo sapiens OX=9606 GN=PAFAH1B1 PE=1 SV=2	0.016	1.769	3	1	1	1	410	46.6	7.37	0	0	1	725807	High
P00491	Purine nucleoside phosphorylase	PNP	Purine nucleoside phosphorylase OS=Homo sapiens OX=9606 GN=PNP PE=1 SV=2	0.016	1.752	3	1	1	1	289	32.1	6.95	1.91	0	1	562208	High
P12532	Creatine kinase U-type, mitochondrial	CKMT1B	Creatine kinase U-type, mitochondrial OS=Homo sapiens OX=9606 GN=CKMT1B PE=1 SV=1	0.016	1.75	2	1	1	1	417	47	8.34	0	0	1	618273	High
P25786	Proteasome subunit alpha type-1	PSMA1	Proteasome subunit alpha type-1 OS=Homo sapiens OX=9606 GN=PSMA1 PE=1 SV=1	0.015	1.749	4	1	1	1	263	29.5	6.61	1.61	0	1	2.19555e+06	High
Q9UI42	Carboxypeptidase A4	CPA4	Carboxypeptidase A4 OS=Homo sapiens OX=9606 GN=CPA4 PE=1 SV=2	0.015	1.718	2	1	1	1	421	47.3	6.7	1.91	0	1	4.00431e+06	High
P09211	Glutathione S-transferase P	GSTP1	Glutathione S-transferase P OS=Homo sapiens OX=9606 GN=GSTP1 PE=1 SV=2	0.018	1.696	5	1	1	1	210	23.3	5.64	2.47	0	1	2.06482e+06	High
Q16777	Histone H2A type 2-C	H2AC20	Histone H2A type 2-C OS=Homo sapiens OX=9606 GN=H2AC20 PE=1 SV=4	0.018	1.676	7	1	1	1	129	14	10.9	1.9	0	1	9223266	High
Q01518	Adenylyl cyclase-associated protein 1	CAP1	Adenylyl cyclase-associated protein 1 OS=Homo sapiens OX=9606 GN=CAP1 PE=1 SV=5	0.017	1.673	2	1	1	1	475	51.9	8.06	0	0	1	0	High
O15078	Centrosomal protein of 290 kDa	CEP290	Centrosomal protein of 290 kDa OS=Homo sapiens OX=9606 GN=CEP290 PE=1 SV=2	0.017	1.673	0	1	4	1	2479	290.2	5.95	9.03	0	1	13226474	High
Q9UEE9	Craniofacial development protein 1	CFDP1	Craniofacial development protein 1 OS=Homo sapiens OX=9606 GN=CFDP1 PE=1 SV=1	0.017	1.667	3	1	1	1	299	33.6	4.81	1.79	0	1	665356	High
P21439	Phosphatidylcholine translocator ABCB4	ABCB4	Phosphatidylcholine translocator ABCB4 OS=Homo sapiens OX=9606 GN=ABCB4 PE=1 SV=2	0.017	1.636	1	1	1	1	1286	141.4	8.48	2.6	0	1	1.89709e+06	High
Q8WUH2	Transforming growth factor-beta receptor-associated protein 1	TGFBRAP1	Transforming growth factor-beta receptor-associated protein 1 OS=Homo sapiens OX=9606 GN=TGFBRAP1 PE=1 SV=1	0.017	1.62	1	1	1	1	860	97.1	6.55	2.03	0	1	6703366	High
P10809	60 kDa heat shock protein, mitochondrial	HSPD1	60 kDa heat shock protein, mitochondrial OS=Homo sapiens OX=9606 GN=HSPD1 PE=1 SV=2	0.017	1.596	2	1	1	1	573	61	5.87	2.3	0	1	0	High
P50395	Rab GDP dissociation inhibitor beta	GDI2	Rab GDP dissociation inhibitor beta OS=Homo sapiens OX=9606 GN=GDI2 PE=1 SV=2	0.019	1.577	2	1	1	1	445	50.6	6.47	1.62	0	1	1.90565e+06	High
P33764	Protein S100-A3	S100A3	Protein S100-A3 OS=Homo sapiens OX=9606 GN=S100A3 PE=1 SV=1	0.019	1.573	9	1	1	1	101	11.7	4.78	0	0	1	1.85941e+06	High
Q9Y3I0	RNA-splicing ligase RtcB homolog	RTCB	RNA-splicing ligase RtcB homolog OS=Homo sapiens OX=9606 GN=RTCB PE=1 SV=1	0.019	1.573	2	1	1	1	505	55.2	7.23	2.18	0	1	1.85553e+06	High
Q7L5L3	Lysophospholipase D GDPD3	GDPD3	Lysophospholipase D GDPD3 OS=Homo sapiens OX=9606 GN=GDPD3 PE=1 SV=3	0.019	1.568	4	1	1	1	318	36.6	7.97	0	0	1	0	High
P12236	ADP/ATP translocase 3	SLC25A6	ADP/ATP translocase 3 OS=Homo sapiens OX=9606 GN=SLC25A6 PE=1 SV=4	0.024	1.552	3	1	1	1	298	32.8	9.74	0	0	1	658482	High
Q9HCG8	Pre-mRNA-splicing factor CWC22 homolog	CWC22	Pre-mRNA-splicing factor CWC22 homolog OS=Homo sapiens OX=9606 GN=CWC22 PE=1 SV=3	0.024	1.545	1	1	1	1	908	105.4	7.03	2.08	0	1	0	High
P60660	Myosin light polypeptide 6	MYL6	Myosin light polypeptide 6 OS=Homo sapiens OX=9606 GN=MYL6 PE=1 SV=2	0.024	1.501	9	1	1	1	151	16.9	4.65	1.78	0	1	1.96331e+06	High
O43175	D-3-phosphoglycerate dehydrogenase	PHGDH	D-3-phosphoglycerate dehydrogenase OS=Homo sapiens OX=9606 GN=PHGDH PE=1 SV=4	0.024	1.474	2	1	1	1	533	56.6	6.71	0	0	1	1.42455e+06	High
P35241	Radixin	RDX	Radixin OS=Homo sapiens OX=9606 GN=RDX PE=1 SV=1	0.023	1.468	1	1	1	1	583	68.5	6.37	1.87	0	1	551986	High
O95865	N(G),N(G)-dimethylarginine dimethylaminohydrolase 2	DDAH2	N(G),N(G)-dimethylarginine dimethylaminohydrolase 2 OS=Homo sapiens OX=9606 GN=DDAH2 PE=1 SV=1	0.023	1.468	5	1	1	1	285	29.6	6.01	2.54	0	1	1.0296e+06	High
Q3ZCW2	Galectin-related protein	LGALSL	Galectin-related protein OS=Homo sapiens OX=9606 GN=LGALSL PE=1 SV=2	0.023	1.465	5	1	1	1	172	19	5.35	0	0	1	617983	High
P02671	Fibrinogen alpha chain	FGA	Fibrinogen alpha chain OS=Homo sapiens OX=9606 GN=FGA PE=1 SV=2	0.023	1.457	1	1	1	1	866	94.9	6.01	1.66	0	1	1.51512e+06	High
Q02878	60S ribosomal protein L6	RPL6	60S ribosomal protein L6 OS=Homo sapiens OX=9606 GN=RPL6 PE=1 SV=3	0.023	1.454	5	1	1	1	288	32.7	10.58	0	0	1	801857	High
Q9UIQ6	Leucyl-cystinyl aminopeptidase	LNPEP	Leucyl-cystinyl aminopeptidase OS=Homo sapiens OX=9606 GN=LNPEP PE=1 SV=3	0.023	1.452	1	1	2	1	1025	117.3	5.73	0	0	1	166595	High
Q96PZ2	Serine protease FAM111A	FAM111A	Serine protease FAM111A OS=Homo sapiens OX=9606 GN=FAM111A PE=1 SV=2	0.023	1.446	3	1	1	1	611	70.2	8.53	1.8	0	1	321875	High
Q08945	FACT complex subunit SSRP1	SSRP1	FACT complex subunit SSRP1 OS=Homo sapiens OX=9606 GN=SSRP1 PE=1 SV=1	0.023	1.442	2	1	1	1	709	81	6.87	2.19	0	1	843762	High
P05091	Aldehyde dehydrogenase, mitochondrial	ALDH2	Aldehyde dehydrogenase, mitochondrial OS=Homo sapiens OX=9606 GN=ALDH2 PE=1 SV=2	0.023	1.431	2	1	1	1	517	56.3	7.05	0	0	1	0	High
Q9UKV3	Apoptotic chromatin condensation inducer in the nucleus	ACIN1	Apoptotic chromatin condensation inducer in the nucleus OS=Homo sapiens OX=9606 GN=ACIN1 PE=1 SV=2	0.023	1.431	1	1	1	1	1341	151.8	6.43	2.66	0	1	5389193	High
O75369	Filamin-B	FLNB	Filamin-B OS=Homo sapiens OX=9606 GN=FLNB PE=1 SV=2	0.023	1.428	0	1	1	1	2602	278	5.73	2.1	0	1	1.31578e+06	High
Q6NUJ1	Proactivator polypeptide-like 1	PSAPL1	Proactivator polypeptide-like 1 OS=Homo sapiens OX=9606 GN=PSAPL1 PE=2 SV=2	0.023	1.415	2	1	1	1	521	56.6	7.27	1.93	0	1	214985	High
P01624	Immunoglobulin kappa variable 3-15	IGKV3-15	Immunoglobulin kappa variable 3-15 OS=Homo sapiens OX=9606 GN=IGKV3-15 PE=1 SV=2	0.023	1.39	8	1	1	1	115	12.5	5.19	2.14	0	1	0	High
P49327	Fatty acid synthase	FASN	Fatty acid synthase OS=Homo sapiens OX=9606 GN=FASN PE=1 SV=3	0.025	1.362	0	1	1	1	2511	273.3	6.44	0	0	1	584966	High
P06396	Gelsolin	GSN	Gelsolin OS=Homo sapiens OX=9606 GN=GSN PE=1 SV=1	0.025	1.361	1	1	2	1	782	85.6	6.28	3.87	0	1	1.70252e+06	High
A8MW92	PHD finger protein 20-like protein 1	PHF20L1	PHD finger protein 20-like protein 1 OS=Homo sapiens OX=9606 GN=PHF20L1 PE=1 SV=2	0.025	1.359	1	1	1	1	1017	114.9	6.83	2.39	0	1	3941650	High
Q96DA0	Zymogen granule protein 16 homolog B	ZG16B	Zymogen granule protein 16 homolog B OS=Homo sapiens OX=9606 GN=ZG16B PE=1 SV=3	0.025	1.343	4	1	1	1	208	22.7	7.39	1.95	0	1	3.77179e+06	High
Q8TDJ6	DmX-like protein 2	DMXL2	DmX-like protein 2 OS=Homo sapiens OX=9606 GN=DMXL2 PE=1 SV=2	0.024	1.338	0	1	1	1	3036	339.4	6.38	1.65	0	1	624939	High
P02763	Alpha-1-acid glycoprotein 1	ORM1	Alpha-1-acid glycoprotein 1 OS=Homo sapiens OX=9606 GN=ORM1 PE=1 SV=2	0.024	1.336	4	1	1	1	201	23.5	5.11	0	0	1	1.57524e+06	High
P08311	Cathepsin G	CTSG	Cathepsin G OS=Homo sapiens OX=9606 GN=CTSG PE=1 SV=2	0.029	1.333	4	1	1	1	255	28.8	11.19	1.96	0	1	1.84046e+06	High
