# Supplementary material for: Regulation of Partial Endothelial-to-Mesenchymal Transition by circATXN1 in Ischemic Diseases
Source: Research Square preprint supplement (doi:10.21203/rs.3.rs-4997868/v1), 2024-09-30
Supplement: Supplementary file 3 [file 955390fcec1380fe663e5a93.xlsx]

## Sheet: Sheet1
ID	Hypoxia_1	Hypoxia_2	Hypoxia_3	Normoxia_1	NC_2	NC_3	logFC	CPM	logCPM	F	PValue	FDR	MMU or specific
6:16326393-16328470	5.26786	5.71078	4.48649	2.62819	3.85718	1.99242	1.20444	0.662334	-0.59437	18.4539	1.76016e-05	0.0363218	MMU_CIRCpedia_20592
14:22909482-22911403	16.3655	21.5536	13.5296	36.0062	28.4385	35.5523	-0.615148	3.68611	1.8821	17.1729	3.44609e-05	0.0363218	species_specific
12:111552279-111555919	0	0	0	1.70832	2.02665	1.30753	-6.54314	0.153181	-2.70669	14.9607	0.000110601	0.0690857	MMU_CIRCpedia_5587
12:5921039-5922804	0	0.675469	0.98142	2.95672	3.39955	2.42827	-2.03696	0.28196	-1.82644	14.6396	0.000131092	0.0690857	MMU_CIRCpedia_215308
7:100812746-100813208	9.34167	10.1934	8.69257	21.1569	17.3246	17.1224	-0.62921	2.06431	1.04566	13.0731	0.000301308	0.118844	species_specific
20:35714184-35725155	0.983333	1.10531	0.49071	4.20511	3.46492	2.42827	-1.60209	0.335901	-1.57389	12.8562	0.000338267	0.118844	species_specific
8:68022035-68038292	0	0	1.68243	3.74517	1.96128	2.55279	-1.93354	0.270936	-1.88397	11.767	0.000653138	0.196688	MMU_CIRCpedia_39972
11:128758114-128768272	0	0	0	0.657048	1.24214	2.17921	-6.24283	0.131687	-2.92481	9.93271	0.00162935	0.360638	MMU_CIRCpedia_218172
1:180003173-180006567	2.24762	4.60547	3.08446	9.98713	5.29545	6.84896	-0.800588	0.80161	-0.319027	9.84784	0.00170617	0.360638	species_specific
12:69800208-69801721	0	0	0	1.70832	1.76515	0.560369	-6.22367	0.130446	-2.93848	9.73278	0.00181621	0.360638	species_specific
2:171925536-171953001	1.05357	2.14922	3.15456	5.5192	4.51094	5.60369	-0.948715	0.564355	-0.825326	9.66743	0.00188189	0.360638	species_specific
14:39179090-39179462	14.6798	13.5708	8.41217	24.9678	16.9977	24.2204	-0.499969	2.53148	1.33998	9.35713	0.00222816	0.391414	species_specific
1:155853275-155853806	1.75595	1.965	1.89274	5.12497	4.90319	4.04711	-0.975708	0.510201	-0.970862	9.07811	0.00259455	0.420716	MMU_CIRCpedia_37532
12:111513356-111520076	0	0	0	1.70832	0.719135	1.30753	-6.09611	0.122721	-3.02655	8.66166	0.00325862	0.490654	species_specific
18:32111753-32113860	1.26429	0	1.40203	3.02242	2.54966	2.98864	-1.32951	0.307841	-1.69974	7.84379	0.00511884	0.519247	MMU_CIRCpedia_40506
19:47264602-47264946	16.2952	17.1323	14.7213	14.9807	13.6636	15.8149	0.461568	2.38003	1.25098	7.78772	0.00527209	0.519247	MMU_CIRCpedia_11322
4:152411302-152412529	3.44167	4.05281	2.31335	8.01599	4.90319	7.72064	-0.720365	0.768531	-0.379824	7.6966	0.00554467	0.519247	species_specific
8:108449822-108455930	0	0	0	1.90544	0.523007	0.871686	-5.91215	0.112676	-3.14974	7.51118	0.00614463	0.519247	species_specific
3:47086194-47098081	0	0	0	0.854162	0.653759	1.68111	-5.8813	0.111118	-3.16984	7.33642	0.00677075	0.519247	species_specific
8:38114191-38121149	0.632143	1.28953	0.420608	0	0	0	5.75814	0.101966	-3.29383	7.07643	0.00782524	0.519247	MMU_CIRCpedia_38008
3:196391812-196403019	27.8845	30.3961	25.0963	50.1985	43.3442	42.2145	-0.355902	5.39145	2.43067	6.88063	0.00872914	0.519247	species_specific
10:68959805-68960249	0.772619	0	1.33193	0	0	0	5.69266	0.0982498	-3.3474	6.52297	0.0106664	0.519247	species_specific
10:28583398-28590832	0	0.552656	0	1.64262	1.6344	1.55658	-2.67062	0.162207	-2.62409	6.44472	0.0111461	0.519247	MMU_CIRCpedia_30043
12:51073822-51074082	0	0.9825	0.630913	1.70832	2.61504	1.99242	-1.60555	0.22501	-2.15194	6.28317	0.0122076	0.519247	species_specific
7:103321931-103322794	2.87976	3.07031	2.94426	1.77403	2.28816	1.99242	0.891699	0.42371	-1.23885	6.15665	0.0131113	0.519247	species_specific
4:128091000-128091512	0	0	0	1.3141	1.43827	0	-5.68526	0.101742	-3.29702	6.1409	0.0132285	0.519247	species_specific
9:111386376-111391824	0	0	0	0.854162	0	1.93016	-5.67242	0.101449	-3.30117	6.09761	0.0135561	0.519247	species_specific
12:123498543-123499536	10.606	9.33375	12.0574	10.1842	9.54488	9.89986	0.461549	1.60432	0.681961	6.06616	0.0137994	0.519247	species_specific
11:73707419-73720899	0	0	0	1.57692	0	1.183	-5.64751	0.100351	-3.31687	5.95325	0.0147107	0.519247	species_specific
11:73707419-73718890	2.52857	4.23703	2.73395	8.80444	3.72643	6.53764	-0.648512	0.721649	-0.470631	5.9322	0.0148873	0.519247	species_specific
7:148846469-148847305	1.05357	2.02641	1.54223	4.86216	3.2688	2.80185	-0.885163	0.409555	-1.28787	5.66914	0.017288	0.519247	MMU_CIRCpedia_21123
1:26942659-26943065	3.93333	2.21062	3.08446	6.63618	5.62233	5.97727	-0.630568	0.707434	-0.499333	5.43754	0.0197319	0.519247	species_specific
7:64543706-64544432	0.842857	2.21062	0	1.90544	1.96128	4.35843	-1.07402	0.304212	-1.71685	5.33805	0.0209728	0.519247	species_specific
9:33953284-33963791	7.09405	10.5005	5.88852	14.1922	14.9057	11.0829	-0.43517	1.5853	0.664759	5.31999	0.0211062	0.519247	species_specific
2:72718102-72733118	0	1.35094	0	1.44551	2.35353	1.80563	-1.68373	0.200552	-2.31795	5.28882	0.021487	0.519247	MMU_CIRCpedia_31895
17:16101249-16101805	0.702381	0.614062	1.89274	0.459934	0	0	3.06129	0.138643	-2.85055	5.27579	0.0216484	0.519247	species_specific
10:68468122-68470163	1.89643	1.35094	0.771115	3.87658	3.00729	2.86411	-0.92102	0.369027	-1.4382	5.24547	0.0220286	0.519247	MMU_CIRCpedia_226276
3:146121111-146124229	4.91667	5.21953	5.1174	11.0384	8.76037	7.84517	-0.507456	1.08122	0.112665	5.2154	0.0224124	0.519247	MMU_CIRCpedia_34384
20:51516783-51524110	0	1.22812	0.630913	0	0	0	5.405	0.0881876	-3.50328	5.20243	0.0225801	0.519247	MMU_CIRCpedia_11732
18:9182381-9221999	7.51548	10.132	9.74409	6.04484	9.34876	10.0244	0.443915	1.3745	0.458904	4.97301	0.025772	0.519247	MMU_CIRCpedia_26408
15:77252366-77286504	0	0	0	0	0.719135	1.55658	-5.42392	0.0913764	-3.45203	4.8796	0.0272028	0.519247	species_specific
8:130152735-130169067	0.632143	1.10531	0	0	0	0	5.32394	0.0853154	-3.55105	4.87252	0.0273145	0.519247	species_specific
11:73707419-73718718	5.9	5.64937	5.60811	10.3157	10.787	8.96591	-0.46301	1.19238	0.253848	4.72838	0.0296965	0.519247	species_specific
5:137942874-137943216	1.96667	2.57906	1.12162	4.20511	3.7918	4.04711	-0.737218	0.464122	-1.10743	4.71176	0.0299848	0.519247	species_specific
12:123586746-123590449	4.21429	3.99141	4.27619	9.06726	6.40684	7.34706	-0.518029	0.89644	-0.15772	4.60398	0.0319263	0.519247	species_specific
11:46493607-46512813	0	0	0	1.70832	0	0.498106	-5.32182	0.0878457	-3.50888	4.51575	0.0336132	0.519247	MMU_CIRCpedia_34212
12:108652271-108654410	5.40833	8.47406	6.72973	7.55605	4.77244	6.53764	0.472995	1.02978	0.0423431	4.43059	0.0353298	0.519247	species_specific
3:58145920-58150227	0	0	0	0	1.24214	0.809422	-5.29856	0.0868007	-3.52615	4.41859	0.035579	0.519247	species_specific
19:11059752-11060187	0	0	0	0.722753	0.849887	0.498106	-5.28217	0.0863186	-3.53419	4.36845	0.0366401	0.519247	species_specific
13:98519242-98519473	0	0	0	1.3141	0	0.809422	-5.27514	0.0862895	-3.53467	4.35994	0.0368235	0.519247	MMU_CIRCpedia_228773
5:109713519-109716264	0	0.614062	0.911318	0	0	0	5.16799	0.0800894	-3.64224	4.32811	0.0375181	0.519247	MMU_CIRCpedia_25884
19:8455404-8463686	5.61905	8.9039	7.01014	13.6009	7.91049	14.8187	-0.405903	1.43979	0.525855	4.29394	0.0382788	0.519247	species_specific
10:101672914-101676436	0.702381	0.798281	0	0	0	0	5.13762	0.0793286	-3.65601	4.25738	0.0391106	0.519247	MMU_CIRCpedia_20625
14:73147794-73148094	0	0	0	0.328524	1.04601	0.622633	-5.24775	0.0851414	-3.554	4.25089	0.0392604	0.519247	species_specific
22:31458474-31463133	0.772619	0.245625	0.420608	0	0	0	5.13786	0.0787245	-3.66704	4.22233	0.0399261	0.519247	species_specific
11:118551785-118559864	0	0	0	0	0.915263	1.05848	-5.23418	0.0847542	-3.56057	4.21013	0.0402141	0.519247	species_specific
17:49041377-49042377	1.82619	0.307031	1.12162	2.36537	2.61504	2.98864	-0.939035	0.311533	-1.68254	4.17604	0.0410303	0.519247	species_specific
3:44829970-44840456	0.491667	0	0.911318	0	0	0	5.12383	0.0780778	-3.67894	4.17168	0.041136	0.519247	species_specific
9:33948373-33953474	1.05357	0.368437	0	0	0	0	5.11324	0.078124	-3.67809	4.1651	0.041296	0.519247	species_specific
7:50703820-50710990	0	0	0	0.525638	1.11139	0.311316	-5.21171	0.0839418	-3.57447	4.12992	0.0421627	0.519247	species_specific
16:8915253-8917156	0	0	0	0.525638	1.04601	0.37358	-5.2071	0.0838139	-3.57667	4.11668	0.0424937	0.519247	species_specific
16:77319848-77326038	0	0	0	0.657048	0.719135	0.560369	-5.18572	0.0832275	-3.5868	4.05622	0.0440407	0.519247	NA
7:50669721-50710990	0.491667	0	0.420608	1.11698	1.50365	1.93016	-1.92908	0.168116	-2.57247	4.03131	0.044695	0.519247	species_specific
2:10600852-10607311	0	0	0	0.525638	0.523007	0.871686	-5.16966	0.0827931	-3.59435	4.01121	0.0452306	0.519247	MMU_CIRCpedia_11920
6:149826263-149853160	0	0	0	0.525638	0.523007	0.871686	-5.16966	0.0827931	-3.59435	4.01121	0.0452306	0.519247	MMU_CIRCpedia_29193
9:125657650-125672643	0	0	0	0.919867	0.980639	0	-5.16342	0.0824357	-3.60059	3.98028	0.0460681	0.519247	MMU_CIRCpedia_17321
4:176727777-176729746	0	0.921094	0.49071	0	0	0	5.01875	0.0762998	-3.71218	3.97733	0.0461487	0.519247	MMU_CIRCpedia_213564
22:41342528-41343576	1.19405	1.28953	0	0.262819	0	0	3.35314	0.112046	-3.15783	3.97513	0.046209	0.519247	species_specific
17:47402131-47414919	0	0.736875	0.630913	0	0	0	4.99311	0.0754264	-3.72879	3.91532	0.0478804	0.519247	species_specific
3:47635189-47638780	0	0	0	0.459934	1.37289	0	-5.13969	0.0816092	-3.61513	3.91472	0.0478975	0.519247	MMU_CIRCpedia_2812
1:39385433-39388658	0.561905	0.798281	0	0	0	0	4.98942	0.0753334	-3.73057	3.90783	0.0480941	0.519247	species_specific
21:39206107-39212707	0	0	0	0.525638	0.523007	0.809422	-5.1237	0.0813887	-3.61903	3.8894	0.0486244	0.519247	species_specific
16:49730770-49822738	0	0	0	0.722753	1.11139	0	-5.12413	0.0812038	-3.62231	3.88006	0.0488954	0.519247	species_specific
10:89751345-89762835	1.26429	1.65797	1.82264	0	1.56902	0.996212	1.19164	0.229805	-2.12152	3.87778	0.048962	0.519247	species_specific
1:155438326-155439068	0.702381	0.921094	1.19172	2.6939	1.43827	3.0509	-0.989788	0.277165	-1.85118	3.82115	0.0506425	0.519247	MMU_CIRCpedia_33272
3:47622206-47638780	0	0.614062	0.701014	0	0	0	4.94987	0.0741871	-3.75269	3.82006	0.0506754	0.519247	species_specific
1:243415701-243426558	2.24762	2.08781	2.94426	4.40222	3.46492	6.1018	-0.591101	0.554749	-0.850093	3.78107	0.0518687	0.519247	MMU_CIRCpedia_12064
2:61284874-61295290	0.561905	0.736875	0	0	0	0	4.9286	0.0737344	-3.76152	3.78034	0.0518912	0.519247	species_specific
3:52412810-52414587	0	0	0	0.591343	0.32688	0.871686	-5.06196	0.0796299	-3.65055	3.74624	0.0529599	0.519247	species_specific
1:209830107-209831043	0	0	0	0.854162	0.915263	0	-5.0635	0.0794652	-3.65353	3.73967	0.0531685	0.519247	species_specific
11:62723586-62724426	0	0	0	0	1.04601	0.684896	-5.06026	0.0793814	-3.65506	3.73293	0.0533832	0.519247	MMU_CIRCpedia_33053
12:5827768-5922804	0	0	0	0.854162	0	0.933949	-5.04033	0.0791022	-3.66014	3.70287	0.0543527	0.519247	species_specific
20:33619516-33623296	0	0.859687	0.420608	0	0	0	4.87889	0.0727531	-3.78085	3.69189	0.0547114	0.519247	species_specific
6:75621531-75634811	0	0	0	0.657048	0.588383	0.498106	-5.0345	0.0787549	-3.66649	3.68119	0.0550632	0.519247	MMU_CIRCpedia_30329
8:38836161-38838546	2.10714	1.22812	0.911318	3.74517	1.8959	3.67353	-0.772446	0.365278	-1.45293	3.67888	0.0551397	0.519247	species_specific
8:140846259-140890769	0	0	0	0.788458	0.523007	0.435843	-5.03139	0.0786803	-3.66785	3.67498	0.0552687	0.519247	MMU_CIRCpedia_28391
11:72984087-72989097	0	0	0	0.459934	0.588383	0.684896	-5.03132	0.0786773	-3.66791	3.67478	0.0552753	0.519247	MMU_CIRCpedia_444
19:3660965-3662001	1.40476	0.552656	0.630913	0.394229	0	0	2.95982	0.119877	-3.06037	3.65382	0.0559747	0.519247	species_specific
4:107682014-107701285	0	0	0	0	0.784511	0.871686	-4.98923	0.0774667	-3.69028	3.58037	0.0585002	0.519247	MMU_CIRCpedia_7722
6:57207627-57210445	0	0	0	0.919867	0.523007	0.249053	-4.98293	0.0773241	-3.69294	3.56809	0.0589342	0.519247	species_specific
7:30550635-30562128	0	0	0	0.591343	0.588383	0.498106	-4.98286	0.077321	-3.693	3.56789	0.0589416	0.519247	species_specific
1:20893516-20904971	0	0.798281	0.420608	0	0	0	4.81308	0.071159	-3.81281	3.56334	0.0591031	0.519247	MMU_CIRCpedia_8619
4:37631384-37649500	0	0	0	0.394229	0.588383	0.684896	-4.97957	0.0772437	-3.69444	3.56132	0.059175	0.519247	species_specific
4:73120161-73125312	0	0	0	0.657048	0.457631	0.560369	-4.97309	0.0770952	-3.69722	3.54858	0.0596307	0.519247	MMU_CIRCpedia_33716
7:139715931-139717015	0.702381	0	0.420608	0	0	0	4.82091	0.0702331	-3.8317	3.54196	0.0598692	0.519247	MMU_CIRCpedia_18975
17:63760913-63766194	0	0.552656	0.630913	0	0	0	4.80297	0.0706255	-3.82367	3.53986	0.0599448	0.519247	MMU_CIRCpedia_1724
7:44645326-44647759	0.491667	0	0.630913	0	0	0	4.81533	0.0701335	-3.83375	3.53452	0.0601383	0.519247	MMU_CIRCpedia_25484
X:37406208-37426000	0.491667	0	0.630913	0	0	0	4.81533	0.0701335	-3.83375	3.53452	0.0601383	0.519247	species_specific
12:32619697-32633689	0.561905	0.614062	0	0	0	0	4.79876	0.0705331	-3.82556	3.5338	0.0601645	0.519247	MMU_CIRCpedia_226620
5:176943334-176958154	0	0	0	0	1.11139	0.498106	-4.96479	0.076686	-3.70489	3.52114	0.0606252	0.519247	MMU_CIRCpedia_23043
17:29676819-29703062	0	0	0	0.722753	0.915263	0	-4.96054	0.0765919	-3.70666	3.51301	0.0609233	0.519247	species_specific
5:138781922-138783372	0	0	0	1.3141	0	0.37358	-4.94567	0.0764736	-3.7089	3.49608	0.0615488	0.519247	MMU_CIRCpedia_17639
2:205440369-205440672	0	0	0	0	0.784511	0.809422	-4.93706	0.076057	-3.71677	3.47354	0.0623924	0.519247	MMU_CIRCpedia_25303
4:82824554-82827632	0	0	0	0.788458	0.588383	0.249053	-4.93386	0.075989	-3.71807	3.46841	0.062586	0.519247	species_specific
1:155676547-155679512	0	1.78078	0.98142	2.95672	1.30752	2.67732	-0.968516	0.266827	-1.90602	3.46545	0.0626981	0.519247	species_specific
2:61115978-61118116	2.31786	1.41234	2.17314	4.33652	2.74579	4.60748	-0.631038	0.465953	-1.10174	3.46053	0.0628849	0.519247	MMU_CIRCpedia_13937
5:65224319-65226219	2.95	3.19312	1.40203	2.16826	1.76515	1.8679	0.71947	0.377629	-1.40496	3.45968	0.0629171	0.519247	MMU_CIRCpedia_1211
13:20731840-20732121	0	0	0	0.394229	0.523007	0.684896	-4.92138	0.0757094	-3.72338	3.44782	0.0633702	0.519247	species_specific
15:41375711-41377304	0	0	0	0.459934	1.11139	0	-4.91978	0.0754532	-3.72827	3.43671	0.0637974	0.519247	MMU_CIRCpedia_4823
7:27785162-27800090	0	0.49125	0.630913	0	0	0	4.73365	0.069023	-3.85678	3.43238	0.0639646	0.519247	species_specific
6:125045210-125058106	0	0	0	0.722753	0.32688	0.560369	-4.91009	0.0754619	-3.72811	3.42935	0.0640823	0.519247	MMU_CIRCpedia_16173
12:95208842-95211267	0.702381	0.429844	0	0.788458	2.94192	0.809422	-1.64401	0.174828	-2.51599	3.42823	0.0641256	0.519247	MMU_CIRCpedia_34680
16:70258979-70262524	0	0	0	0	0.32688	1.24527	-4.89733	0.07518	-3.73351	3.40834	0.0649027	0.519247	species_specific
13:30227411-30241086	0	0	0	0	0.980639	0.560369	-4.90028	0.075022	-3.73654	3.40451	0.0650535	0.519247	MMU_CIRCpedia_225069
8:97713661-97719189	0	0	0	1.18269	0	0.435843	-4.8895	0.0750161	-3.73666	3.39579	0.0653981	0.519247	species_specific
10:68771205-68773099	0.421429	0	0.630913	0	0	0	4.7245	0.0681223	-3.87573	3.39018	0.0656208	0.519247	species_specific
13:52397231-52402681	0.421429	0	0.630913	0	0	0	4.7245	0.0681223	-3.87573	3.39018	0.0656208	0.519247	species_specific
16:24968350-24970580	0	0.614062	0.49071	0	0	0	4.69283	0.0683186	-3.87158	3.3742	0.06626	0.519247	species_specific
2:223881941-223884749	0.421429	0.675469	0	0	0	0	4.68423	0.068162	-3.87489	3.36148	0.0667734	0.519247	species_specific
2:60891682-60901083	0	0	0	0.459934	0.523007	0.560369	-4.86783	0.0743253	-3.75	3.3515	0.067179	0.519247	species_specific
1:86352858-86354692	0	0.429844	0.630913	0	0	0	4.66083	0.0674192	-3.8907	3.31348	0.0687491	0.519247	species_specific
15:40183713-40196774	0	0	0	0.854162	0	0.684896	-4.82738	0.0734813	-3.76648	3.28603	0.0699074	0.519247	species_specific
X:53405244-53405391	0	0	0	0.788458	0	0.747159	-4.82616	0.0734558	-3.76698	3.28404	0.069992	0.519247	species_specific
12:1289851-1290012	0	0.49125	0.560811	0	0	0	4.63949	0.0670688	-3.89821	3.28279	0.0700454	0.519247	MMU_CIRCpedia_4839
3:196270414-196283538	0	0.49125	0.560811	0	0	0	4.63949	0.0670688	-3.89821	3.28279	0.0700454	0.519247	species_specific
15:90486953-90492711	0	0	0	0.657048	0	0.871686	-4.82371	0.0734049	-3.76798	3.28007	0.0701616	0.519247	species_specific
1:213117316-213129889	0	0	0	0.459934	0.719135	0.311316	-4.82922	0.0732881	-3.77028	3.2795	0.070186	0.519247	MMU_CIRCpedia_12647
1:181002605-181005463	0	0	0	0.591343	0	0.933949	-4.82248	0.0733794	-3.76848	3.27808	0.0702466	0.519247	MMU_CIRCpedia_10560
11:128768117-128772985	1.12381	0	0.350507	1.51121	1.37289	2.11695	-1.38275	0.194062	-2.36541	3.26437	0.0708357	0.519247	species_specific
12:32598496-32601423	0	0	0	1.05128	0.457631	0	-4.816	0.0730194	-3.77558	3.25841	0.0710938	0.519247	species_specific
12:56670274-56673065	0	0	0	1.05128	0.457631	0	-4.816	0.0730194	-3.77558	3.25841	0.0710938	0.519247	species_specific
2:239990073-240022340	0	0	0	0.459934	0.523007	0.498106	-4.81098	0.0729142	-3.77766	3.25046	0.0714393	0.519247	MMU_CIRCpedia_34374
9:76067954-76096102	0	0	0	0.657048	0.457631	0.37358	-4.80857	0.0728663	-3.77861	3.24674	0.0716012	0.519247	MMU_CIRCpedia_221226
17:56901418-56904488	0	0	0	0.591343	0.457631	0.435843	-4.80733	0.0728407	-3.77911	3.2448	0.0716863	0.519247	species_specific
4:7868621-7872080	0	0.368437	0	1.18269	1.30752	0.871686	-2.70548	0.124745	-3.00294	3.2385	0.0719624	0.519247	MMU_CIRCpedia_17950
19:47089966-47094608	0.35119	0.307031	0.350507	0	0	0	4.61704	0.0663247	-3.91431	3.2328	0.0722129	0.519247	species_specific
10:91425280-91462184	0	0	0	0.394229	1.04601	0	-4.8007	0.0724717	-3.78644	3.22518	0.0725497	0.519247	species_specific
1:200760838-200815644	0	0	0	0.328524	0.32688	0.809422	-4.78999	0.0724901	-3.78607	3.21778	0.072878	0.519247	species_specific
8:38429681-38429948	0	0	0	0	0.392256	1.05848	-4.78992	0.072487	-3.78613	3.2176	0.0728861	0.519247	species_specific
7:157223253-157225539	0	0	0	0.459934	0.980639	0	-4.79577	0.0723725	-3.78841	3.21749	0.0728909	0.519247	MMU_CIRCpedia_213015
15:75868950-75873568	1.12381	0.921094	1.54223	0	0	1.49432	1.57225	0.172707	-2.5336	3.21022	0.0732154	0.519247	species_specific
5:65451474-65452918	0	0	0	0.525638	0.915263	0	-4.79083	0.0722734	-3.79039	3.20979	0.0732346	0.519247	species_specific
2:86765026-86766024	0.561905	0.429844	0	0	0	0	4.57926	0.0657225	-3.92747	3.20908	0.0732664	0.519247	species_specific
1:155395458-155459898	0.702381	1.22812	0.771115	0	0	0.498106	2.62794	0.123727	-3.01477	3.19991	0.0736782	0.519247	species_specific
7:99908581-99909660	0	0	0	1.11698	0	0.37358	-4.77394	0.0721749	-3.79236	3.1931	0.0739856	0.519247	species_specific
10:102157018-102158214	0	0	0	0.985572	0	0.498106	-4.7714	0.0721241	-3.79338	3.18914	0.0741649	0.519247	species_specific
X:9937133-9937685	0	0.49125	0.49071	0	0	0	4.53892	0.065119	-3.94078	3.18378	0.0744083	0.519247	species_specific
1:168038370-168045227	0.561905	0	0.350507	0	0	0	4.5322	0.0642411	-3.96036	3.18358	0.0744178	0.519247	MMU_CIRCpedia_11521
6:47503279-47554766	0.632143	0.307031	0	0	0	0	4.52368	0.064495	-3.95467	3.17614	0.0747571	0.519247	MMU_CIRCpedia_19946
8:68027221-68060779	0	0.552656	0.420608	0	0	0	4.51584	0.064773	-3.94846	3.16913	0.0750782	0.519247	MMU_CIRCpedia_2995
5:122801868-122803613	0	0	0	0.394229	0.653759	0.37358	-4.76322	0.0717247	-3.80139	3.16675	0.0751878	0.519247	species_specific
15:75854385-75873568	0	1.16672	0.701014	1.97114	2.41891	1.05848	-1.19212	0.212029	-2.23767	3.16519	0.0752599	0.519247	MMU_CIRCpedia_23085
8:17989858-17993619	0	0	0	0.459934	0.588383	0.37358	-4.75817	0.0716259	-3.80337	3.1589	0.0755502	0.519247	MMU_CIRCpedia_19609
4:82454721-82457038	0	0	0	0	0.588383	0.809422	-4.74914	0.0714478	-3.80697	3.14476	0.0762072	0.519247	MMU_CIRCpedia_19
4:139071865-139073567	0.491667	0.429844	0	0	0	0	4.47184	0.0637391	-3.97168	3.14232	0.0763215	0.519247	MMU_CIRCpedia_22039
12:96298868-96311177	0.491667	0.245625	0	1.3798	0.588383	2.05469	-2.0257	0.149526	-2.74153	3.13409	0.0767073	0.519247	species_specific
8:132836539-132844318	0	0	0	0.262819	0.392256	0.747159	-4.73507	0.0711777	-3.81243	3.12479	0.077146	0.519247	species_specific
12:1754257-1754514	0.421429	0.49125	0	0	0	0	4.44531	0.0633632	-3.98021	3.1247	0.0771501	0.519247	MMU_CIRCpedia_4728
16:68121986-68123121	0.421429	0.49125	0	0	0	0	4.44531	0.0633632	-3.98021	3.1247	0.0771501	0.519247	MMU_CIRCpedia_1674
4:82844385-82848977	0	0	0	0	0.392256	0.996212	-4.72984	0.0710761	-3.81449	3.11855	0.0774416	0.519247	species_specific
15:93002176-93002317	0.561905	0	0.280406	0	0	0	4.42275	0.0622735	-4.00524	3.11106	0.0777984	0.519247	species_specific
10:13663452-13675044	0.421429	0	0.420608	0	0	0	4.41788	0.06221	-4.00671	3.10768	0.07796	0.519247	species_specific
2:112299848-112303351	0.421429	0	0.420608	0	0	0	4.41788	0.06221	-4.00671	3.10768	0.07796	0.519247	MMU_CIRCpedia_7314
20:37184179-37184373	0.561905	0.307031	0	0	0	0	4.41169	0.0625088	-3.9998	3.1028	0.078194	0.519247	species_specific
8:102838743-102843747	0	0	0	0.591343	0.784511	0	-4.71913	0.0706341	-3.82349	3.10015	0.0783214	0.519247	species_specific
4:87046165-87047594	1.61548	1.84219	1.96284	3.74517	3.2688	3.67353	-0.629497	0.42896	-1.22108	3.09926	0.0783643	0.519247	MMU_CIRCpedia_1036
11:34071725-34076642	0	0	0	0	0.849887	0.498106	-4.71376	0.0705293	-3.82563	3.09363	0.0786354	0.519247	species_specific
18:21791373-21804014	0	0	0	0.722753	0	0.684896	-4.7052	0.0706134	-3.82391	3.08939	0.0788408	0.519247	MMU_CIRCpedia_212774
14:91342379-91343657	0.491667	0	0.280406	0	0	0	4.30135	0.0602786	-4.05221	3.07788	0.0794004	0.519247	species_specific
2:36883931-36894033	0.491667	0	0.280406	0	0	0	4.30135	0.0602786	-4.05221	3.07788	0.0794004	0.519247	MMU_CIRCpedia_29977
19:5616131-5616486	0.421429	0	0.350507	0	0	0	4.29872	0.0602473	-4.05296	3.07728	0.0794296	0.519247	species_specific
9:4286037-4286523	0.421429	0	0.350507	0	0	0	4.29872	0.0602473	-4.05296	3.07728	0.0794296	0.519247	MMU_CIRCpedia_15265
1:28473553-28480604	0.280952	0	0.49071	0	0	0	4.29345	0.0601847	-4.05446	3.07607	0.0794886	0.519247	species_specific
6:15615266-15637804	0.632143	1.35094	0.49071	0	0.392256	0	2.78806	0.114896	-3.1216	3.07368	0.0796055	0.519247	species_specific
14:52511239-52544371	0	0.368437	0.49071	0	0	0	4.36663	0.0619146	-4.01358	3.07166	0.0797044	0.519247	species_specific
2:9350807-9358889	0	0.368437	0.49071	0	0	0	4.36663	0.0619146	-4.01358	3.07166	0.0797044	0.519247	MMU_CIRCpedia_13172
1:12001400-12002103	0	0	0	0	0.653759	0.684896	-4.69396	0.0701578	-3.83325	3.06988	0.0797915	0.519247	species_specific
1:231795241-231818517	1.40476	1.71937	0	2.56249	2.35353	2.30374	-0.853041	0.28588	-1.80652	3.06698	0.0799342	0.519247	MMU_CIRCpedia_219064
16:304303-314683	0	0	0	0.459934	0.523007	0.37358	-4.69009	0.0700881	-3.83469	3.06529	0.0800174	0.519247	MMU_CIRCpedia_227085
17:64212573-64214242	0.421429	0.429844	0	0	0	0	4.35592	0.0617612	-4.01715	3.06415	0.0800733	0.519247	MMU_CIRCpedia_1791
13:95723241-95725252	0.421429	0	0.280406	0	0	0	4.16867	0.0582891	-4.10063	3.06229	0.080165	0.519247	species_specific
5:133064979-133076898	0.421429	0	0.280406	0	0	0	4.16867	0.0582891	-4.10063	3.06229	0.080165	0.519247	MMU_CIRCpedia_22590
9:137716625-137752408	0.421429	0	0.280406	0	0	0	4.16867	0.0582891	-4.10063	3.06229	0.080165	0.519247	species_specific
6:149836084-149853160	0	0	0	0	0.588383	0.747159	-4.68731	0.0700342	-3.8358	3.06189	0.080185	0.519247	MMU_CIRCpedia_29192
9:109106507-109108570	0.280952	0	0.420608	0	0	0	4.16298	0.0582274	-4.10216	3.06065	0.0802461	0.519247	MMU_CIRCpedia_213104
19:17259288-17260022	0	0.429844	0.420608	0	0	0	4.34079	0.0615737	-4.02154	3.05811	0.0803714	0.519247	species_specific
9:35236468-35243364	0	0.429844	0.420608	0	0	0	4.34079	0.0615737	-4.02154	3.05811	0.0803714	0.519247	MMU_CIRCpedia_20012
10:67966682-68014186	0	0	0	0.459934	0.457631	0.435843	-4.68341	0.0699645	-3.83723	3.05726	0.0804133	0.519247	species_specific
1:172551511-172557794	0	0.307031	0.49071	0	0	0	4.27196	0.0603106	-4.05145	3.05587	0.0804823	0.519247	species_specific
11:86250295-86256512	0	0	0	0.328524	0.457631	0.560369	-4.6807	0.0699138	-3.83828	3.05399	0.0805756	0.519247	species_specific
2:219566829-219568324	0.421429	0.368437	0	0	0	0	4.26057	0.060158	-4.0551	3.05391	0.0805795	0.519247	species_specific
X:154768301-154769310	0.421429	0.368437	0	0	0	0	4.26057	0.060158	-4.0551	3.05391	0.0805795	0.519247	species_specific
14:90943077-91001159	0.491667	0.245625	0	0	0	0	4.18993	0.0589206	-4.08508	3.05291	0.0806288	0.519247	MMU_CIRCpedia_218
17:30803900-30804108	0.491667	0.245625	0	0	0	0	4.18993	0.0589206	-4.08508	3.05291	0.0806288	0.519247	species_specific
15:63532646-63559970	0	0.49125	0.350507	0	0	0	4.31459	0.0612338	-4.02953	3.05173	0.0806878	0.519247	species_specific
16:2757780-2760499	0	0.368437	0.420608	0	0	0	4.24455	0.0599722	-4.05956	3.05009	0.0807692	0.519247	species_specific
22:31455851-31463133	0	0.368437	0.420608	0	0	0	4.24455	0.0599722	-4.05956	3.05009	0.0807692	0.519247	species_specific
15:65752378-65761438	0.280952	0.552656	0	0	0	0	4.2984	0.0610192	-4.03459	3.04789	0.0808786	0.519247	MMU_CIRCpedia_25945
3:48765003-48765349	0	0.245625	0.49071	0	0	0	4.17036	0.0587051	-4.09037	3.04756	0.0808947	0.519247	species_specific
3:170136418-170145521	0	0	0	0.394229	0.392256	0.560369	-4.67535	0.0698157	-3.8403	3.04756	0.0808952	0.519247	species_specific
3:179592643-179601790	0	0	0	0	0.457631	0.871686	-4.67391	0.0697873	-3.84089	3.04576	0.0809844	0.519247	species_specific
12:27676427-27676599	0.421429	0.307031	0	0	0	0	4.15819	0.0585534	-4.0941	3.04482	0.0810318	0.519247	species_specific
14:30670255-30675065	0.35119	0	0.280406	0	0	0	4.0226	0.0563053	-4.15059	3.03687	0.0814294	0.519247	species_specific
6:57124733-57134870	0.35119	0	0.280406	0	0	0	4.0226	0.0563053	-4.15059	3.03687	0.0814294	0.519247	MMU_CIRCpedia_37744
12:8713810-8754093	0.35119	0.368437	0	0	0	0	4.12591	0.0581878	-4.10314	3.03619	0.0814632	0.519247	species_specific
12:116964696-116988869	0.421429	0.245625	0	0	0	0	4.04761	0.0569475	-4.13422	3.02353	0.082101	0.519247	MMU_CIRCpedia_4422
20:38040434-38066256	0	0.245625	0.420608	0	0	0	4.02942	0.0567654	-4.13884	3.01557	0.0825051	0.519247	MMU_CIRCpedia_10889
X:118398386-118404444	0	0.245625	0.420608	0	0	0	4.02942	0.0567654	-4.13884	3.01557	0.0825051	0.519247	species_specific
4:169602007-169602678	0	0	0	0	0.849887	0.435843	-4.65035	0.0691123	-3.85491	3.0083	0.0828755	0.519247	species_specific
10:126996747-127000307	0	0	0	0.657048	0	0.684896	-4.64003	0.0691778	-3.85355	3.00288	0.083153	0.519247	species_specific
7:105481051-105495253	0	0	0	0.394229	0	0.933949	-4.63445	0.069077	-3.85565	2.99575	0.0835196	0.519247	species_specific
3:179592643-179598771	0	0	0	0	0.719135	0.560369	-4.63659	0.0688656	-3.86007	2.9907	0.0837807	0.519247	species_specific
14:102983555-102986580	0	0.368437	0.280406	0	0	0	3.96532	0.0561036	-4.15576	2.98748	0.0839472	0.519247	species_specific
19:18537600-18538436	0.983333	0.859687	1.26183	0	0.653759	0.311316	1.95739	0.147684	-2.75942	2.97535	0.0845783	0.519247	species_specific
1:227112311-227112913	0	0	0	0	0.588383	0.684896	-4.62271	0.0686192	-3.86524	2.97293	0.084705	0.519247	MMU_CIRCpedia_215267
5:41794002-41807438	0.280952	0	0.280406	0	0	0	3.86053	0.0543275	-4.20217	2.95757	0.0855131	0.519247	MMU_CIRCpedia_19497
5:72989426-72990864	0	0.675469	0	1.3141	1.50365	0.996212	-2.09398	0.142745	-2.80848	2.95045	0.0858903	0.519247	MMU_CIRCpedia_35886
13:52433661-52434882	0.280952	0.307031	0	0	0	0	3.85219	0.0546231	-4.19434	2.94847	0.0859958	0.519247	species_specific
2:233449981-233452060	0.280952	0.307031	0	0	0	0	3.85219	0.0546231	-4.19434	2.94847	0.0859958	0.519247	species_specific
7:677228-711527	0	0	0	0	0.392256	0.871686	-4.60163	0.0682503	-3.87302	2.94597	0.0861286	0.519247	species_specific
16:68121986-68126610	0.35119	0	0.630913	1.44551	1.69977	1.05848	-1.7103	0.16224	-2.6238	2.93834	0.0865363	0.519247	MMU_CIRCpedia_1675
15:51893814-51902036	0	0	0	0	0.32688	0.933949	-4.59454	0.0681275	-3.87562	2.93691	0.0866132	0.519247	species_specific
22:40270121-40273600	0	0	0	0.854162	0	0.435843	-4.5776	0.0678416	-3.88169	2.91542	0.0877733	0.519247	species_specific
10:91849511-91851336	0	0	0	0	0.849887	0.37358	-4.58404	0.0676938	-3.88483	2.91495	0.0877988	0.519247	MMU_CIRCpedia_18270
12:109906571-109911235	0	0	0	0.591343	0	0.684896	-4.57177	0.0677411	-3.88383	2.90792	0.0881821	0.519247	species_specific
11:74285808-74286391	0	0	0	0.525638	0	0.747159	-4.57031	0.0677159	-3.88436	2.90605	0.0882848	0.519247	species_specific
2:65090982-65098066	0	0	0	0	0.784511	0.435843	-4.57685	0.0675709	-3.88745	2.90569	0.0883042	0.519247	MMU_CIRCpedia_12877
2:61178980-61181405	0	0	0	0.591343	0.653759	0	-4.57556	0.0675521	-3.88786	2.90415	0.0883888	0.519247	species_specific
3:48927461-48927813	0	0	0	0.328524	0.653759	0.249053	-4.56971	0.0674512	-3.89001	2.89656	0.0888054	0.519247	species_specific
5:133064979-133070496	0	0	0	0.722753	0.523007	0	-4.56402	0.0673569	-3.89203	2.8893	0.0892063	0.519247	MMU_CIRCpedia_22596
6:13639562-13644729	0	0	0	0.722753	0.523007	0	-4.56402	0.0673569	-3.89203	2.8893	0.0892063	0.519247	MMU_CIRCpedia_20073
X:154446414-154449297	0	0	0	0.394229	0.588383	0.249053	-4.56393	0.0673537	-3.8921	2.88913	0.089216	0.519247	species_specific
6:85618817-85619417	0	1.28953	0.560811	2.56249	1.11139	1.68111	-1.16553	0.207174	-2.27108	2.88635	0.0893702	0.519247	species_specific
3:71015548-71053773	0	0	0	0.262819	0.588383	0.37358	-4.56099	0.0673033	-3.89318	2.88531	0.0894274	0.519247	species_specific
16:69245601-69260260	0	0	0	0.788458	0.457631	0	-4.55821	0.0672594	-3.89412	2.88184	0.0896203	0.519247	MMU_CIRCpedia_1964
17:7890570-7891064	0.280952	0.245625	0	0	0	0	3.71395	0.053021	-4.23729	2.87489	0.0900083	0.519247	species_specific
8:42925556-42943445	0.280952	0.245625	0	0	0	0	3.71395	0.053021	-4.23729	2.87489	0.0900083	0.519247	MMU_CIRCpedia_14720
1:66639776-66643719	0	0.245625	0.280406	0	0	0	3.69933	0.0529034	-4.2405	2.86645	0.0904813	0.519247	MMU_CIRCpedia_38600
5:123545416-123575963	0	0	0	0.459934	0.392256	0.37358	-4.54346	0.067011	-3.89946	2.86281	0.090686	0.519247	MMU_CIRCpedia_22768
15:92937517-92939718	0	0	0	0.985572	0.261504	0	-4.54065	0.0669672	-3.9004	2.8593	0.0908838	0.519247	species_specific
3:44455120-44455696	0	0	0	0	0.392256	0.809422	-4.53298	0.0668352	-3.90325	2.84926	0.0914531	0.519247	species_specific
17:39490556-39492890	0	0	0	0	0.261504	0.933949	-4.51807	0.0665908	-3.90853	2.83008	0.092551	0.519247	species_specific
6:151348710-151353752	0.983333	0.49125	1.54223	0	0.523007	0.435843	1.94123	0.145881	-2.77714	2.82048	0.0931055	0.519247	species_specific
2:241343751-241348191	0	0	0	0.854162	0	0.37358	-4.50777	0.0664283	-3.91206	2.81673	0.0933232	0.519247	species_specific
16:69370482-69372355	0	0	0	0.657048	0	0.560369	-4.50318	0.0663532	-3.91369	2.81067	0.0936766	0.519247	MMU_CIRCpedia_2022
16:74457873-74459789	0	0	0	0.591343	0.588383	0	-4.49803	0.0660102	-3.92117	2.80749	0.0938621	0.519247	species_specific
20:35858301-35863400	0	0	0	0.459934	0	0.747159	-4.49858	0.0662781	-3.91532	2.80625	0.0939347	0.519247	MMU_CIRCpedia_10725
3:128806371-128807671	0	0	0	0	0.653759	0.498106	-4.49176	0.0659066	-3.92343	2.8038	0.0940781	0.519247	species_specific
8:28980070-29018913	0	0	0	0	0.588383	0.560369	-4.48411	0.0657845	-3.92611	2.79926	0.0943447	0.519247	MMU_CIRCpedia_25953
18:21765771-21768752	0	0	0	0.788458	0.392256	0	-4.47972	0.065719	-3.92755	2.79664	0.0944992	0.519247	MMU_CIRCpedia_2077
7:66240324-66241270	0	0	0	0.788458	0.392256	0	-4.47972	0.065719	-3.92755	2.79664	0.0944992	0.519247	MMU_CIRCpedia_7444
22:35809779-35810004	0	0	0	0	0.392256	0.747159	-4.46091	0.0654186	-3.93416	2.78543	0.0951621	0.519247	MMU_CIRCpedia_29544
1:51840225-51840514	0	0	0	0.262819	0.32688	0.560369	-4.45943	0.0653968	-3.93464	2.78454	0.0952152	0.519247	species_specific
1:155415743-155459898	0	0	0	0	0.32688	0.809422	-4.45311	0.0652968	-3.93684	2.78075	0.0954407	0.519247	species_specific
6:167870385-167902386	0	0	0	0	0.261504	0.871686	-4.44527	0.0651752	-3.93953	2.77603	0.0957224	0.519247	species_specific
1:114463103-114463556	0	0	0	0	0.849887	0.249053	-4.44134	0.0648518	-3.94671	2.77491	0.0957895	0.519247	species_specific
9:135866455-135883078	0	0	0	0	0.849887	0.249053	-4.44134	0.0648518	-3.94671	2.77491	0.0957895	0.519247	species_specific
8:60741258-60781430	0	0	0	0.394229	0.719135	0	-4.43512	0.0647582	-3.94879	2.7711	0.0960171	0.519247	MMU_CIRCpedia_32875
13:46003138-46045513	0	0	0	0.854162	0	0.311316	-4.43448	0.0650135	-3.94312	2.76949	0.0961137	0.519247	MMU_CIRCpedia_29038
3:197832196-197835822	0	0	0	0.788458	0	0.37358	-4.43288	0.0649885	-3.94367	2.76852	0.0961719	0.519247	species_specific
12:123718622-123724791	0	0	0	0.722753	0	0.435843	-4.43128	0.0649636	-3.94422	2.76755	0.0962303	0.519247	species_specific
19:45277922-45278615	0	0	0	0.459934	0.653759	0	-4.42878	0.0646613	-3.95095	2.76722	0.0962501	0.519247	MMU_CIRCpedia_12730
2:113939958-113942359	0	0	0	0.459934	0.653759	0	-4.42878	0.0646613	-3.95095	2.76722	0.0962501	0.519247	species_specific
16:27213584-27215008	0	0	0	0.591343	0	0.560369	-4.42807	0.0649137	-3.94533	2.76561	0.0963474	0.519247	species_specific
17:5308693-5332152	0	0	0	0.591343	0	0.560369	-4.42807	0.0649137	-3.94533	2.76561	0.0963474	0.519247	MMU_CIRCpedia_27619
2:10791794-10793202	0	0	0	0.591343	0	0.560369	-4.42807	0.0649137	-3.94533	2.76561	0.0963474	0.519247	species_specific
3:196806578-196807914	0	0	0	0	0.719135	0.37358	-4.42545	0.0646081	-3.95214	2.76519	0.0963723	0.519247	species_specific
12:106842588-106843947	0	0	0	0.459934	0	0.684896	-4.42485	0.0648639	-3.94644	2.76365	0.096465	0.519247	MMU_CIRCpedia_31880
15:74671454-74675142	0	0	0	0.394229	0	0.747159	-4.42324	0.064839	-3.94699	2.76267	0.096524	0.519247	species_specific
17:27303366-27309272	0	0	0	0.394229	0	0.747159	-4.42324	0.064839	-3.94699	2.76267	0.096524	0.519247	species_specific
1:205268949-205269884	0	0	0	0.262819	0	0.871686	-4.42001	0.0647892	-3.9481	2.76071	0.0966424	0.519247	MMU_CIRCpedia_7802
8:70213902-70216764	0	0	0	0.262819	0.457631	0.37358	-4.39979	0.0642215	-3.9608	2.74937	0.0973299	0.519247	MMU_CIRCpedia_7783
2:71426459-71431428	0	0	0	0.788458	0.32688	0	-4.3967	0.0641781	-3.96178	2.74745	0.0974466	0.519247	species_specific
X:38273385-38276772	0	0	0	0.525638	0.261504	0.311316	-4.38194	0.0639571	-3.96675	2.73828	0.0980075	0.519247	species_specific
11:18291441-18292019	0	0	0	0.328524	0.719135	0	-4.35598	0.06331	-3.98142	2.72272	0.0989664	0.519247	species_specific
15:58913498-58916999	0	0	0	0	0.784511	0.249053	-4.35588	0.0633068	-3.9815	2.72266	0.0989704	0.519247	MMU_CIRCpedia_218212
7:39997493-40002031	0	0	0	0.788458	0	0.311316	-4.35559	0.0635723	-3.97546	2.72178	0.0990249	0.519247	MMU_CIRCpedia_12126
12:27633361-27635115	0	0	0	0.591343	0	0.498106	-4.35052	0.0634978	-3.97715	2.71858	0.0992234	0.519247	species_specific
18:21765771-21791557	0	0	0	0.459934	0	0.622633	-4.34713	0.0634482	-3.97828	2.71644	0.0993565	0.519247	MMU_CIRCpedia_2079
2:201760880-201761818	0	0	0	0.394229	0	0.684896	-4.34544	0.0634234	-3.97884	2.71537	0.0994233	0.519247	species_specific
4:25151959-25159107	0	0	0	0.459934	0.588383	0	-4.3426	0.0631173	-3.98582	2.71418	0.0994973	0.519247	species_specific
7:74356409-74357477	0	0	0	0.459934	0.588383	0	-4.3426	0.0631173	-3.98582	2.71418	0.0994973	0.519247	species_specific
22:46707842-46721015	0	0	0	0	0.653759	0.37358	-4.33908	0.0630642	-3.98703	2.71193	0.0996379	0.519247	species_specific
20:38531166-38532859	0	0	0	0	0.588383	0.435843	-4.33061	0.0629431	-3.98981	2.7065	0.0999774	0.519247	species_specific
7:105508114-105508544	0	0	0	0	0.588383	0.435843	-4.33061	0.0629431	-3.98981	2.7065	0.0999774	0.519247	species_specific
1:243293090-243330692	0	0	0	0.657048	0.392256	0	-4.32232	0.0628287	-3.99243	2.70117	0.100312	0.519247	MMU_CIRCpedia_220618
2:28917892-28929710	0	0	0	0.657048	0.392256	0	-4.32232	0.0628287	-3.99243	2.70117	0.100312	0.519247	MMU_CIRCpedia_27873
13:45151686-45207505	0	0	0	0	0.523007	0.498106	-4.3221	0.0628221	-3.99258	2.70103	0.100321	0.519247	species_specific
17:29666866-29703062	0	0	0	0.394229	0.392256	0.249053	-4.31539	0.0627294	-3.99472	2.6967	0.100593	0.519247	species_specific
4:38089931-38103157	0	0	0	0	0.457631	0.560369	-4.31355	0.0627012	-3.99536	2.69551	0.100668	0.519247	MMU_CIRCpedia_25842
15:51887588-51902036	0	0	0	0	0.392256	0.622633	-4.30495	0.0625805	-3.99814	2.68995	0.10102	0.519247	MMU_CIRCpedia_29079
16:46677314-46679156	0	0	0	0	0.392256	0.622633	-4.30495	0.0625805	-3.99814	2.68995	0.10102	0.519247	species_specific
3:27448650-27452498	0.983333	1.04391	1.40203	3.81088	1.56902	2.11695	-0.763012	0.300916	-1.73257	2.6872	0.101195	0.519247	MMU_CIRCpedia_228684
X:10063444-10067490	0	0	0	0	0.32688	0.684896	-4.29631	0.0624598	-4.00093	2.68435	0.101376	0.519247	species_specific
9:98076917-98078347	0	0	0	0	0.261504	0.747159	-4.28762	0.0623392	-4.00372	2.67871	0.101736	0.519247	species_specific
12:1180539-1190052	0	0	0	0.788458	0	0.249053	-4.2739	0.0621544	-4.008	2.66977	0.102308	0.519247	MMU_CIRCpedia_4901
3:50068689-50070552	0	0	0	0.722753	0	0.311316	-4.27212	0.0621297	-4.00857	2.6686	0.102383	0.519247	species_specific
12:79820773-79822190	0	0	0	0.591343	0	0.435843	-4.26855	0.0620803	-4.00972	2.66627	0.102533	0.519247	MMU_CIRCpedia_221764
5:131521389-131548190	0	0	0	0.591343	0	0.435843	-4.26855	0.0620803	-4.00972	2.66627	0.102533	0.519247	species_specific
1:32036909-32038619	0	0	0	0.525638	0	0.498106	-4.26677	0.0620556	-4.0103	2.6651	0.102609	0.519247	species_specific
6:143748984-143753912	0	0	0	0.525638	0	0.498106	-4.26677	0.0620556	-4.0103	2.6651	0.102609	0.519247	MMU_CIRCpedia_7827
13:49167243-49175541	0	0	0	0.328524	0.653759	0	-4.26517	0.0617643	-4.01708	2.66411	0.102672	0.519247	species_specific
19:5598792-5600260	0	0	0	0.459934	0	0.560369	-4.26498	0.0620309	-4.01087	2.66393	0.102684	0.519247	species_specific
5:179593477-179594963	0	0	0	0.394229	0	0.622633	-4.26319	0.0620062	-4.01144	2.66276	0.10276	0.519247	species_specific
14:23081747-23090633	0	0	0	0.328524	0	0.684896	-4.2614	0.0619815	-4.01202	2.66158	0.102836	0.519247	species_specific
12:2820085-2821792	0	0	0	0.394229	0.588383	0	-4.25808	0.0616684	-4.01932	2.66039	0.102913	0.519247	species_specific
17:62010549-62063301	0	0	0	0.394229	0.588383	0	-4.25808	0.0616684	-4.01932	2.66039	0.102913	0.519247	MMU_CIRCpedia_32401
1:86715723-86719635	0	0	0	0.459934	0.523007	0	-4.25096	0.0615726	-4.02157	2.65844	0.103039	0.519247	species_specific
10:31908171-31910563	0	0	0	0.459934	0.523007	0	-4.25096	0.0615726	-4.02157	2.65844	0.103039	0.519247	MMU_CIRCpedia_25033
19:48234402-48241063	0	0	0	0.525638	0.457631	0	-4.24381	0.0614769	-4.02381	2.65648	0.103166	0.519247	species_specific
17:59075646-59088407	0	0	0	0	0.523007	0.435843	-4.23823	0.0613993	-4.02563	2.65501	0.103262	0.519247	MMU_CIRCpedia_32738
9:96458378-96484633	0	0	0	0	0.523007	0.435843	-4.23823	0.0613993	-4.02563	2.65501	0.103262	0.519247	species_specific
16:4505483-4507012	0	0	0	0.591343	0.392256	0	-4.23664	0.0613812	-4.02606	2.65448	0.103296	0.519247	MMU_CIRCpedia_212614
22:45700281-45729590	0	0	0	0.591343	0.392256	0	-4.23664	0.0613812	-4.02606	2.65448	0.103296	0.519247	MMU_CIRCpedia_32055
5:56856599-56859915	0	0	0	0.591343	0.392256	0	-4.23664	0.0613812	-4.02606	2.65448	0.103296	0.519247	species_specific
2:226906792-226914351	0.491667	0.552656	0.560811	2.7596	1.11139	1.05848	-1.23532	0.193031	-2.3731	2.6513	0.103503	0.519247	MMU_CIRCpedia_31052
2:20254862-20256170	0	0	0	0.722753	0.261504	0	-4.2222	0.0611901	-4.03056	2.65042	0.10356	0.519247	species_specific
1:145839889-145841071	0	0	0	0	0.392256	0.560369	-4.22012	0.0611588	-4.0313	2.64993	0.103592	0.519247	species_specific
15:58013857-58014281	0	0	0	0	0.392256	0.560369	-4.22012	0.0611588	-4.0313	2.64993	0.103592	0.519247	species_specific
11:33551039-33552241	0	0	0	0	0.32688	0.622633	-4.21099	0.0610387	-4.03413	2.64734	0.103761	0.519247	species_specific
5:179709872-179720560	0	0	0	0.262819	0.261504	0.435843	-4.20926	0.0610173	-4.03464	2.6468	0.103796	0.519247	species_specific
15:74655732-74656068	0	0	0	0.328524	0.588383	0	-4.16816	0.0602178	-4.05367	2.64426	0.103962	0.519247	species_specific
1:113671733-113673465	0	0	0	0	0.588383	0.311316	-4.15858	0.0600944	-4.05663	2.64193	0.104114	0.519247	species_specific
10:110885252-110890670	0	0	0	0	0.588383	0.311316	-4.15858	0.0600944	-4.05663	2.64193	0.104114	0.519247	species_specific
10:119038237-119042772	0	0	0	0	0.588383	0.311316	-4.15858	0.0600944	-4.05663	2.64193	0.104114	0.519247	species_specific
17:7943390-7944638	0	0	0	0	0.588383	0.311316	-4.15858	0.0600944	-4.05663	2.64193	0.104114	0.519247	species_specific
7:50674435-50710990	0	0	0	0.459934	0.457631	0	-4.15307	0.0600272	-4.05824	2.64048	0.10421	0.519247	species_specific
2:171028338-171046362	0	0	0	0.722753	0	0.249053	-4.18547	0.0607103	-4.04192	2.63983	0.104252	0.519247	MMU_CIRCpedia_39900
9:2181570-2186228	0	0	0	0.722753	0	0.249053	-4.18547	0.0607103	-4.04192	2.63983	0.104252	0.519247	species_specific
3:47622206-47678311	0	0	0	0.591343	0	0.37358	-4.18171	0.060661	-4.04309	2.63879	0.10432	0.519247	species_specific
1:35381258-35389082	0	0	0	0.525638	0.392256	0	-4.14547	0.059932	-4.06053	2.63854	0.104337	0.519247	MMU_CIRCpedia_6771
2:69363544-69374113	0	0	0	0.525638	0	0.435843	-4.17982	0.0606364	-4.04367	2.63835	0.104349	0.519247	species_specific
17:76291014-76294021	0	0	0	0.459934	0	0.498106	-4.17793	0.0606118	-4.04426	2.63791	0.104378	0.519247	species_specific
2:200856681-200856985	0	0	0	0.459934	0	0.498106	-4.17793	0.0606118	-4.04426	2.63791	0.104378	0.519247	species_specific
15:55223888-55234956	0	0	0	0.394229	0	0.560369	-4.17605	0.0605873	-4.04484	2.63747	0.104407	0.519247	species_specific
21:37420298-37480826	0	0	0	0.394229	0	0.560369	-4.17605	0.0605873	-4.04484	2.63747	0.104407	0.519247	species_specific
2:15461200-15478289	0	0	0	0	0.457631	0.435843	-4.13953	0.0598548	-4.06239	2.6371	0.104431	0.519247	MMU_CIRCpedia_7946
4:150798080-150817257	0	0	0	0	0.457631	0.435843	-4.13953	0.0598548	-4.06239	2.6371	0.104431	0.519247	species_specific
17:18865468-18911251	0	0	0	0.262819	0.392256	0.249053	-4.13772	0.0598336	-4.0629	2.6366	0.104464	0.519247	MMU_CIRCpedia_224599
2:70224553-70236175	0	0	0	0.262819	0.392256	0.249053	-4.13772	0.0598336	-4.0629	2.6366	0.104464	0.519247	species_specific
19:52373110-52374427	0	0	0	0.591343	0.32688	0	-4.13785	0.0598369	-4.06282	2.63658	0.104466	0.519247	species_specific
14:55181212-55183753	0	0	0	0.262819	0.32688	0.311316	-4.12811	0.059714	-4.06579	2.63411	0.104628	0.519247	MMU_CIRCpedia_212735
14:57229733-57247712	0	0	0	0.394229	0.261504	0.249053	-4.12237	0.0596436	-4.06749	2.63258	0.104729	0.519247	MMU_CIRCpedia_21456
5:96722638-96730860	0	0	0	0	0.32688	0.560369	-4.12028	0.0596157	-4.06816	2.63209	0.104761	0.519247	species_specific
1:27841013-27843330	0	0	0	0	0.588383	0.249053	-4.06406	0.0586671	-4.09131	2.62492	0.105235	0.519247	species_specific
2:214767481-214792445	0	0	0	0	0.588383	0.249053	-4.06406	0.0586671	-4.09131	2.62492	0.105235	0.519247	species_specific
2:169544720-169557297	0	0	0	0.328524	0.523007	0	-4.0642	0.0586705	-4.09122	2.62491	0.105236	0.519247	species_specific
5:137941943-137943216	0	0	0	0.591343	0	0.311316	-4.0893	0.05924	-4.07728	2.62368	0.105318	0.519247	species_specific
17:59731420-59735473	0	0	0	0.525638	0	0.37358	-4.0873	0.0592155	-4.07788	2.62314	0.105353	0.519247	species_specific
19:11120091-11120522	0	0	0	0.525638	0	0.37358	-4.0873	0.0592155	-4.07788	2.62314	0.105353	0.519247	species_specific
13:30240459-30241086	0	0	0	0.459934	0	0.435843	-4.08531	0.059191	-4.07848	2.6226	0.105389	0.519247	species_specific
14:57246710-57247712	0	0	0	0.459934	0	0.435843	-4.08531	0.059191	-4.07848	2.6226	0.105389	0.519247	species_specific
1:21221746-21228041	0	0	0	0.394229	0.457631	0	-4.05617	0.0585757	-4.09355	2.62258	0.105391	0.519247	MMU_CIRCpedia_8577
22:31258290-31260077	0	0	0	0.394229	0.457631	0	-4.05617	0.0585757	-4.09355	2.62258	0.105391	0.519247	MMU_CIRCpedia_16945
6:42974002-42975038	0	0	0	0.394229	0.457631	0	-4.05617	0.0585757	-4.09355	2.62258	0.105391	0.519247	species_specific
7:139398598-139407350	0	0	0	0.394229	0.457631	0	-4.05617	0.0585757	-4.09355	2.62258	0.105391	0.519247	species_specific
7:26192494-26197732	0	0	0	0.394229	0.457631	0	-4.05617	0.0585757	-4.09355	2.62258	0.105391	0.519247	MMU_CIRCpedia_227894
2:58084088-58089723	0	0	0	0.394229	0	0.498106	-4.08331	0.0591666	-4.07907	2.62206	0.105425	0.519247	MMU_CIRCpedia_14788
6:160046497-160048543	0	0	0	0.394229	0	0.498106	-4.08331	0.0591666	-4.07907	2.62206	0.105425	0.519247	species_specific
9:33944364-33948587	0	0	0	0.394229	0	0.498106	-4.08331	0.0591666	-4.07907	2.62206	0.105425	0.519247	species_specific
13:102622876-102627924	0	0	0	0.262819	0	0.622633	-4.0793	0.0591176	-4.08027	2.62097	0.105497	0.519247	species_specific
21:33432176-33432871	0	0	0	0.262819	0	0.622633	-4.0793	0.0591176	-4.08027	2.62097	0.105497	0.519247	species_specific
10:112527086-112538330	0	0	0	0.459934	0.392256	0	-4.04811	0.058481	-4.09589	2.62021	0.105548	0.519247	MMU_CIRCpedia_23145
15:76292430-76295737	0	0	0	0.459934	0.392256	0	-4.04811	0.058481	-4.09589	2.62021	0.105548	0.519247	MMU_CIRCpedia_23177
4:1699563-1703700	0	0	0	0.459934	0.392256	0	-4.04811	0.058481	-4.09589	2.62021	0.105548	0.519247	species_specific
1:1806474-1825499	0	0	0	0	0.457631	0.37358	-4.04385	0.0584287	-4.09718	2.61902	0.105627	0.519247	MMU_CIRCpedia_10610
10:12118748-12120267	0	0	0	0	0.457631	0.37358	-4.04385	0.0584287	-4.09718	2.61902	0.105627	0.519247	species_specific
15:63532646-63563008	0	0	0	0	0.457631	0.37358	-4.04385	0.0584287	-4.09718	2.61902	0.105627	0.519247	MMU_CIRCpedia_26585
7:30455136-30457042	0	0	0	0	0.457631	0.37358	-4.04385	0.0584287	-4.09718	2.61902	0.105627	0.519247	species_specific
9:13205035-13206099	0	0	0	0	0.457631	0.37358	-4.04385	0.0584287	-4.09718	2.61902	0.105627	0.519247	MMU_CIRCpedia_30780
6:18215006-18217885	0	0	0	0	0.392256	0.435843	-4.03366	0.0583096	-4.10012	2.61599	0.105829	0.519247	species_specific
1:47368468-47375293	0	0	0	0	0.32688	0.498106	-4.02342	0.0581907	-4.10307	2.61291	0.106034	0.519247	MMU_CIRCpedia_216988
3:170136418-170178938	0	0	0	0	0.32688	0.498106	-4.02342	0.0581907	-4.10307	2.61291	0.106034	0.519247	MMU_CIRCpedia_15976
14:35053277-35053451	0	0	0	0	0.261504	0.560369	-4.01313	0.0580719	-4.10602	2.60978	0.106244	0.519247	species_specific
2:197416740-197420542	0	0	0	0.591343	0	0.249053	-3.99055	0.0578171	-4.11236	2.6029	0.106706	0.519247	species_specific
4:37631384-37638504	16.2952	23.3344	15.1419	18.3316	18.2399	21.4808	0.253227	2.85326	1.51261	2.60266	0.106722	0.519247	species_specific
1:31915894-31919658	0	0	0	0.459934	0	0.37358	-3.9863	0.0577684	-4.11358	2.60168	0.106788	0.519247	MMU_CIRCpedia_7417
1:92693801-92704744	0	0	0	0.459934	0	0.37358	-3.9863	0.0577684	-4.11358	2.60168	0.106788	0.519247	species_specific
3:119503531-119513719	0	0	0	0.459934	0	0.37358	-3.9863	0.0577684	-4.11358	2.60168	0.106788	0.519247	species_specific
12:123751109-123752402	0	0	0	0.394229	0	0.435843	-3.98418	0.057744	-4.11418	2.60107	0.106829	0.519247	species_specific
2:230442936-230450255	0	0	0	0.394229	0	0.435843	-3.98418	0.057744	-4.11418	2.60107	0.106829	0.519247	species_specific
9:132296886-132311856	0	0	0	0.394229	0	0.435843	-3.98418	0.057744	-4.11418	2.60107	0.106829	0.519247	species_specific
9:97369921-97371706	0	0	0	0.328524	0	0.498106	-3.98205	0.0577196	-4.11479	2.60045	0.106871	0.519247	species_specific
1:21833632-21833815	0.983333	1.04391	1.05152	0	0.457631	0.622633	1.78753	0.148835	-2.74822	2.59678	0.107118	0.519247	NA
11:119232447-119232695	0	0	0	0.328524	0.457631	0	-3.95223	0.0571223	-4.1298	2.5965	0.107137	0.519247	MMU_CIRCpedia_20260
6:36798164-36800070	0	0	0	0	0.523007	0.249053	-3.95207	0.0571189	-4.12989	2.59646	0.10714	0.519247	species_specific
15:34890214-34893773	0	0	0	0.394229	0.392256	0	-3.94364	0.0570282	-4.13218	2.59284	0.107385	0.519247	species_specific
4:169155479-169156679	0	0	0	0.394229	0.392256	0	-3.94364	0.0570282	-4.13218	2.59284	0.107385	0.519247	MMU_CIRCpedia_25056
1:224317693-224317930	0	0	0	0	0.457631	0.311316	-3.94129	0.0570004	-4.13288	2.59187	0.107451	0.519247	species_specific
22:24302194-24347176	0	0	0	0	0.457631	0.311316	-3.94129	0.0570004	-4.13288	2.59187	0.107451	0.519247	MMU_CIRCpedia_217601
4:169463242-169508852	0	0	0	0	0.457631	0.311316	-3.94129	0.0570004	-4.13288	2.59187	0.107451	0.519247	species_specific
7:129205202-129206587	0	0	0	0	0.457631	0.311316	-3.94129	0.0570004	-4.13288	2.59187	0.107451	0.519247	species_specific
17:19309884-19329647	0	0	0	0.459934	0.32688	0	-3.93501	0.0569341	-4.13456	2.58915	0.107636	0.519247	MMU_CIRCpedia_25067
5:65260599-65273447	0	0	0	0.459934	0.32688	0	-3.93501	0.0569341	-4.13456	2.58915	0.107636	0.519247	MMU_CIRCpedia_1204
1:113724758-113726574	0	0	0	0	0.392256	0.37358	-3.93044	0.056882	-4.13588	2.58722	0.107766	0.519247	species_specific
1:155676547-155680456	0	0	0	0	0.392256	0.37358	-3.93044	0.056882	-4.13588	2.58722	0.107766	0.519247	species_specific
11:74810183-74817714	0	0	0	0	0.392256	0.37358	-3.93044	0.056882	-4.13588	2.58722	0.107766	0.519247	MMU_CIRCpedia_36208
5:137634036-137639977	0	0	0	0	0.392256	0.37358	-3.93044	0.056882	-4.13588	2.58722	0.107766	0.519247	species_specific
9:122853951-122855878	0	0	0	0	0.392256	0.37358	-3.93044	0.056882	-4.13588	2.58722	0.107766	0.519247	species_specific
10:7276891-7285954	0	0	0.560811	2.10255	0.849887	0.560369	-2.20266	0.133299	-2.90726	2.58709	0.107776	0.519247	MMU_CIRCpedia_1198
1:6667708-6681037	0	0	0	0.525638	0.261504	0	-3.92634	0.0568401	-4.13695	2.58542	0.107889	0.519247	species_specific
3:113901030-113904272	0	0	0	0.525638	0.261504	0	-3.92634	0.0568401	-4.13695	2.58542	0.107889	0.519247	species_specific
4:82878729-82881940	0	0	0	0.262819	0.261504	0.249053	-3.91747	0.0567428	-4.13942	2.58161	0.108149	0.519247	MMU_CIRCpedia_122
20:34470047-34492597	0	0	0	0	0.261504	0.498106	-3.90855	0.0566456	-4.14189	2.57776	0.108413	0.519247	species_specific
4:17961902-17972885	0	0	0	0.525638	0	0.249053	-3.88221	0.0563679	-4.14898	2.56617	0.109209	0.519247	MMU_CIRCpedia_20693
2:32607454-32611582	0	0	0	0.459934	0	0.311316	-3.87994	0.0563437	-4.1496	2.56517	0.109278	0.519247	species_specific
7:122113117-122133741	0	0	0	0.459934	0	0.311316	-3.87994	0.0563437	-4.1496	2.56517	0.109278	0.519247	MMU_CIRCpedia_13680
1:227193785-227199652	0	0	0	0.394229	0	0.37358	-3.87767	0.0563195	-4.15022	2.56417	0.109347	0.519247	species_specific
1:32154587-32158361	0	0	0	0.394229	0	0.37358	-3.87767	0.0563195	-4.15022	2.56417	0.109347	0.519247	species_specific
12:110128949-110147048	0	0	0	0.394229	0	0.37358	-3.87767	0.0563195	-4.15022	2.56417	0.109347	0.519247	species_specific
12:79828319-79872938	0	0	0	0.394229	0	0.37358	-3.87767	0.0563195	-4.15022	2.56417	0.109347	0.519247	MMU_CIRCpedia_2256
17:59079753-59084089	0	0	0	0.394229	0	0.37358	-3.87767	0.0563195	-4.15022	2.56417	0.109347	0.519247	species_specific
3:47720665-47745993	0	0	0	0.394229	0	0.37358	-3.87767	0.0563195	-4.15022	2.56417	0.109347	0.519247	species_specific
4:103066326-103067592	0	0	0	0.394229	0	0.37358	-3.87767	0.0563195	-4.15022	2.56417	0.109347	0.519247	species_specific
8:70637814-70641050	0	0	0	0.394229	0	0.37358	-3.87767	0.0563195	-4.15022	2.56417	0.109347	0.519247	species_specific
10:90917731-90920348	0	0	0	0.328524	0	0.435843	-3.8754	0.0562952	-4.15084	2.56317	0.109417	0.519247	NA
15:70980100-70984257	0	0	0	0.328524	0	0.435843	-3.8754	0.0562952	-4.15084	2.56317	0.109417	0.519247	MMU_CIRCpedia_24930
2:71526219-71539239	0	0	0	0.328524	0	0.435843	-3.8754	0.0562952	-4.15084	2.56317	0.109417	0.519247	species_specific
4:128074459-128098330	0	0	0	0.328524	0	0.435843	-3.8754	0.0562952	-4.15084	2.56317	0.109417	0.519247	MMU_CIRCpedia_219992
2:112064161-112067067	0	0	0	0.262819	0	0.498106	-3.87312	0.056271	-4.15146	2.56216	0.109486	0.519247	species_specific
2:42718987-42723035	0	0	0	0.262819	0	0.498106	-3.87312	0.056271	-4.15146	2.56216	0.109486	0.519247	MMU_CIRCpedia_31416
3:197870159-197875775	0	0	0	0.262819	0	0.498106	-3.87312	0.056271	-4.15146	2.56216	0.109486	0.519247	species_specific
16:57164000-57173869	1.12381	3.07031	0.911318	1.11698	0.784511	1.61884	0.854202	0.255325	-1.96959	2.55684	0.109855	0.519247	MMU_CIRCpedia_34902
11:74789625-74817714	1.26429	1.65797	1.19172	3.02242	2.61504	2.73958	-0.674261	0.340144	-1.55578	2.55541	0.109955	0.519247	MMU_CIRCpedia_36209
2:213310058-213317356	0	0	0	0.262819	0.457631	0	-3.84017	0.055667	-4.16704	2.55158	0.110222	0.519247	species_specific
2:61278164-61281242	0	0	0	0.262819	0.457631	0	-3.84017	0.055667	-4.16704	2.55158	0.110222	0.519247	species_specific
10:114830851-114836246	0	0	0	0.328524	0.392256	0	-3.83096	0.0555734	-4.16946	2.54732	0.110519	0.519247	species_specific
14:21462349-21463767	0	0	0	0.328524	0.392256	0	-3.83096	0.0555734	-4.16946	2.54732	0.110519	0.519247	species_specific
4:38035587-38049898	0	0	0	0.328524	0.392256	0	-3.83096	0.0555734	-4.16946	2.54732	0.110519	0.519247	species_specific
1:94201719-94231643	0	0	0	0	0.457631	0.249053	-3.83078	0.0555699	-4.16955	2.54725	0.110524	0.519247	MMU_CIRCpedia_5660
17:16139007-16143696	0	0	0	0	0.457631	0.249053	-3.83078	0.0555699	-4.16955	2.54725	0.110524	0.519247	species_specific
17:64341633-64352463	0	0	0	0	0.457631	0.249053	-3.83078	0.0555699	-4.16955	2.54725	0.110524	0.519247	MMU_CIRCpedia_1805
20:51674152-51690819	0	0	0	0	0.457631	0.249053	-3.83078	0.0555699	-4.16955	2.54725	0.110524	0.519247	species_specific
20:63928334-63931022	0	0	0	0	0.457631	0.249053	-3.83078	0.0555699	-4.16955	2.54725	0.110524	0.519247	species_specific
7:22308338-22318037	0	0	0	0	0.457631	0.249053	-3.83078	0.0555699	-4.16955	2.54725	0.110524	0.519247	MMU_CIRCpedia_224356
1:43824730-43838311	0	0	0	0.394229	0.32688	0	-3.82171	0.0554798	-4.17189	2.54302	0.11082	0.519247	species_specific
10:92928338-92974232	0	0	0	0.394229	0.32688	0	-3.82171	0.0554798	-4.17189	2.54302	0.11082	0.519247	MMU_CIRCpedia_18625
1:202755270-202764145	0	0	0	0	0.392256	0.311316	-3.81916	0.0554521	-4.17261	2.54185	0.110902	0.519247	species_specific
1:40064226-40064559	0	0	0	0	0.392256	0.311316	-3.81916	0.0554521	-4.17261	2.54185	0.110902	0.519247	species_specific
6:170317369-170323259	0	0	0	0.459934	0.261504	0	-3.81242	0.0553864	-4.17432	2.53868	0.111125	0.519247	species_specific
5:137942874-137949184	0	0	0	0	0.32688	0.37358	-3.80747	0.0553345	-4.17568	2.53642	0.111284	0.519247	species_specific
4:139342825-139344339	0	0	0	0	0.261504	0.435843	-3.79571	0.055217	-4.17874	2.53097	0.111669	0.519247	species_specific
X:16735226-16736232	0	0	0	0	0.261504	0.435843	-3.79571	0.055217	-4.17874	2.53097	0.111669	0.519247	MMU_CIRCpedia_11326
7:16216065-16278226	0	0	0	0.394229	0	0.311316	-3.76263	0.0548928	-4.18724	2.51545	0.112773	0.519247	MMU_CIRCpedia_18111
13:32535768-32537027	0	0	0	0.328524	0	0.37358	-3.76019	0.0548687	-4.18787	2.5143	0.112855	0.519247	MMU_CIRCpedia_215645
3:155910691-155914570	0	0	0	0.328524	0	0.37358	-3.76019	0.0548687	-4.18787	2.5143	0.112855	0.519247	species_specific
7:73708588-73709122	0	0	0	0.262819	0	0.435843	-3.75774	0.0548446	-4.18851	2.51315	0.112938	0.519247	MMU_CIRCpedia_37334
22:24302194-24313466	0	1.65797	2.38345	3.21954	2.28816	2.73958	-0.678526	0.333911	-1.58247	2.50193	0.113876	0.519247	MMU_CIRCpedia_29009
10:48401611-48410168	0	0	0	0.262819	0.392256	0	-3.70863	0.0541164	-4.20779	2.49246	0.11443	0.519247	MMU_CIRCpedia_16900
10:69483690-69498396	0	0	0	0.262819	0.392256	0	-3.70863	0.0541164	-4.20779	2.49246	0.11443	0.519247	species_specific
13:46723220-46728984	0	0	0	0.262819	0.392256	0	-3.70863	0.0541164	-4.20779	2.49246	0.11443	0.519247	species_specific
14:73355625-73366981	0	0	0	0.262819	0.392256	0	-3.70863	0.0541164	-4.20779	2.49246	0.11443	0.519247	MMU_CIRCpedia_31426
4:42022837-42023384	0	0	0	0.262819	0.392256	0	-3.70863	0.0541164	-4.20779	2.49246	0.11443	0.519247	species_specific
8:43069554-43072307	0	0	0	0.262819	0.392256	0	-3.70863	0.0541164	-4.20779	2.49246	0.11443	0.519247	species_specific
20:16356329-16381747	0	0	0	0.328524	0.32688	0	-3.69866	0.0540235	-4.21027	2.48752	0.11479	0.519247	MMU_CIRCpedia_215955
11:85974707-86031611	0	0	0	0	0.392256	0.249053	-3.69846	0.05402	-4.21036	2.48743	0.114796	0.519247	MMU_CIRCpedia_33657
12:53719738-53722183	0	0	0	0	0.392256	0.249053	-3.69846	0.05402	-4.21036	2.48743	0.114796	0.519247	species_specific
15:59671182-59680308	0	0	0	0	0.392256	0.249053	-3.69846	0.05402	-4.21036	2.48743	0.114796	0.519247	species_specific
5:74745677-74750667	0	0	0	0	0.392256	0.249053	-3.69846	0.05402	-4.21036	2.48743	0.114796	0.519247	MMU_CIRCpedia_35514
11:74285808-74289130	0	0	0	0.394229	0.261504	0	-3.68865	0.0539306	-4.21275	2.48254	0.115154	0.519247	species_specific
14:92716135-92717461	0	0	0	0.394229	0.261504	0	-3.68865	0.0539306	-4.21275	2.48254	0.115154	0.519247	species_specific
17:37440504-37465541	0	0	0	0.394229	0.261504	0	-3.68865	0.0539306	-4.21275	2.48254	0.115154	0.519247	species_specific
7:100023418-100024307	10.8167	16.3341	11.076	17.2147	17.9784	22.6638	-0.259976	2.38784	1.25571	2.47538	0.115679	0.519247	MMU_CIRCpedia_8605
17:28163542-28172618	0	0	0	0	0.261504	0.37358	-3.67321	0.0537862	-4.21662	2.47483	0.11572	0.519247	species_specific
17:64348259-64352463	0	0	0	0	0.261504	0.37358	-3.67321	0.0537862	-4.21662	2.47483	0.11572	0.519247	species_specific
2:232014834-232030080	0	0	0	0	0.261504	0.37358	-3.67321	0.0537862	-4.21662	2.47483	0.11572	0.519247	MMU_CIRCpedia_32570
11:13413529-13421838	0	0	0.420608	1.44551	0.849887	0.809422	-2.41758	0.120713	-3.05035	2.47333	0.11583	0.519247	MMU_CIRCpedia_3527
1:30992389-30995220	2.10714	3.43875	3.50507	5.91343	5.29545	4.42069	-0.441265	0.639332	-0.645362	2.46237	0.11664	0.519247	MMU_CIRCpedia_7571
12:96294998-96298983	0	0	0	0.394229	0	0.249053	-3.63756	0.053464	-4.22529	2.45683	0.117052	0.519247	species_specific
16:69245601-69270285	0	0	0	0.394229	0	0.249053	-3.63756	0.053464	-4.22529	2.45683	0.117052	0.519247	MMU_CIRCpedia_40232
19:32899856-32918339	0	0	0	0.394229	0	0.249053	-3.63756	0.053464	-4.22529	2.45683	0.117052	0.519247	species_specific
5:98873592-98879728	0	0	0	0.394229	0	0.249053	-3.63756	0.053464	-4.22529	2.45683	0.117052	0.519247	species_specific
15:44322964-44332078	0	0	0	0.328524	0	0.311316	-3.63493	0.05344	-4.22594	2.45549	0.117152	0.519247	species_specific
8:94534838-94543942	0	0	0	0.328524	0	0.311316	-3.63493	0.05344	-4.22594	2.45549	0.117152	0.519247	species_specific
3:47675474-47678311	0	0	0	0.262819	0	0.37358	-3.63229	0.0534161	-4.22658	2.45415	0.117252	0.519247	species_specific
5:73773854-73795391	0	0	0	0.262819	0	0.37358	-3.63229	0.0534161	-4.22658	2.45415	0.117252	0.519247	MMU_CIRCpedia_35713
16:67036638-67082339	0.491667	0.9825	1.82264	1.18269	0	0.311316	1.48973	0.162981	-2.61723	2.45089	0.117496	0.519247	MMU_CIRCpedia_1408
21:15762890-15766141	0.983333	1.22812	0.841217	2.89101	1.83053	2.05469	-0.790532	0.274461	-1.86533	2.43812	0.118456	0.522395	MMU_CIRCpedia_29487
2:159169249-159170805	0.983333	0.675469	1.54223	0.591343	2.54966	3.7358	-0.764986	0.28522	-1.80985	2.43448	0.118731	0.522515	species_specific
15:65178933-65180204	1.475	2.33344	1.61233	4.66504	3.5303	2.05469	-0.565935	0.417214	-1.26114	2.4305	0.119033	0.522752	species_specific
15:75490207-75527261	0	0	0	0.262819	0.32688	0	-3.56403	0.0525649	-4.24976	2.41685	0.120073	0.524047	MMU_CIRCpedia_23727
7:35667433-35673278	0	0	0	0.262819	0.32688	0	-3.56403	0.0525649	-4.24976	2.41685	0.120073	0.524047	MMU_CIRCpedia_14395
X:80717572-80730020	0	0	0	0.262819	0.32688	0	-3.56403	0.0525649	-4.24976	2.41685	0.120073	0.524047	species_specific
5:71592925-71604468	0	0	0	0.328524	0.261504	0	-3.55316	0.0524726	-4.25229	2.41082	0.120537	0.524984	MMU_CIRCpedia_214309
15:50300788-50309798	0	0	0	0	0.261504	0.311316	-3.53919	0.052353	-4.25558	2.40302	0.121138	0.526515	species_specific
5:16779544-16783469	0.772619	2.70187	1.40203	3.54806	2.48428	3.36222	-0.596527	0.380388	-1.39446	2.38935	0.122202	0.530046	species_specific
7:24620051-24668660	0.421429	0	0	1.05128	1.11139	0.871686	-2.38174	0.119918	-3.05988	2.37897	0.123016	0.531667	species_specific
1:235194012-235214026	0	0	0	0.262819	0	0.311316	-3.49482	0.0519852	-4.26576	2.37815	0.12308	0.531667	MMU_CIRCpedia_220128
12:12244261-12244655	1.26429	1.16672	0.420608	2.56249	1.83053	2.05469	-0.816889	0.261977	-1.93249	2.37392	0.123414	0.532018	MMU_CIRCpedia_8121
1:63478763-63490218	0	0	0	0.262819	0.261504	0	-3.4035	0.0510123	-4.29301	2.32354	0.127468	0.548371	MMU_CIRCpedia_213127
2:46001403-46010517	0	0	0	0	0.261504	0.249053	-3.39127	0.0509172	-4.2957	2.31633	0.128059	0.548677	MMU_CIRCpedia_32462
9:36352741-36353331	0	0	0	0	0.261504	0.249053	-3.39127	0.0509172	-4.2957	2.31633	0.128059	0.548677	species_specific
2:168129540-168140758	0	0	0	0.262819	0	0.249053	-3.34278	0.0505518	-4.30609	2.28774	0.130437	0.553242	MMU_CIRCpedia_26987
2:173954872-173956232	0	0	0	0.262819	0	0.249053	-3.34278	0.0505518	-4.30609	2.28774	0.130437	0.553242	MMU_CIRCpedia_28256
3:47693240-47701402	0	0	0	0.262819	0	0.249053	-3.34278	0.0505518	-4.30609	2.28774	0.130437	0.553242	species_specific
3:9669431-9671170	0	0	0	0.262819	0	0.249053	-3.34278	0.0505518	-4.30609	2.28774	0.130437	0.553242	species_specific
5:31995575-32010482	0	0	0	0.262819	0	0.249053	-3.34278	0.0505518	-4.30609	2.28774	0.130437	0.553242	MMU_CIRCpedia_6296
4:37631384-37635123	3.58214	5.21953	5.74831	5.05927	6.21071	2.86411	0.382897	0.762763	-0.390694	2.2144	0.136766	0.57892	species_specific
1:23030468-23050520	2.45833	4.97391	3.36487	5.97914	5.1647	6.78669	-0.388289	0.735418	-0.443363	2.19534	0.138466	0.584943	MMU_CIRCpedia_8449
1:30992389-31007102	0.702381	0.736875	1.05152	0	0	0.684896	2.11844	0.123227	-3.02061	2.18354	0.13953	0.586444	MMU_CIRCpedia_7564
3:150575648-150581746	0	0	0.630913	1.51121	0.588383	1.30753	-2.00044	0.133076	-2.90968	2.18296	0.139583	0.586444	species_specific
17:47618349-47619164	0.280952	2.08781	1.33193	1.90544	2.81116	2.73958	-0.670827	0.306881	-1.70425	2.18182	0.139687	0.586444	species_specific
7:139402136-139409654	1.12381	0.736875	1.12162	4.00799	1.50365	1.05848	-0.765842	0.268315	-1.898	2.17909	0.139934	0.586444	species_specific
3:9445047-9445740	0.421429	0.49125	0	1.18269	1.50365	1.05848	-1.65361	0.148684	-2.74968	2.16234	0.141466	0.591689	species_specific
1:39350784-39359264	0	0	0.280406	1.77403	0.392256	0.37358	-2.63161	0.103413	-3.27351	2.12831	0.144638	0.602368	species_specific
8:42325969-42329214	0.280952	0	0	0	0.849887	1.61884	-2.62322	0.103756	-3.26874	2.12775	0.14469	0.602368	species_specific
20:48953555-48963898	0.772619	1.35094	0.630913	1.90544	2.15741	2.05469	-0.801591	0.251855	-1.98933	2.12577	0.144877	0.602368	species_specific
9:124908376-124912026	0.632143	1.84219	1.89274	1.24839	0.849887	0.871686	0.886945	0.225332	-2.14988	2.11826	0.14559	0.604139	MMU_CIRCpedia_19024
14:22906194-22911403	3.37143	3.50016	2.45355	6.50478	3.72643	5.54143	-0.404451	0.648601	-0.624597	2.10383	0.146968	0.608361	species_specific
16:11894953-11896785	0	0.9825	0	1.90544	0.457631	1.49432	-1.58728	0.149978	-2.73718	2.10158	0.147184	0.608361	species_specific
19:19492305-19492712	1.12381	1.22812	1.05152	1.97114	2.28816	2.73958	-0.691419	0.290769	-1.78205	2.08705	0.14859	0.612903	species_specific
3:37129062-37149038	0	0	1.12162	0.657048	1.8959	1.36979	-1.44038	0.160522	-2.63915	2.08423	0.148865	0.612903	species_specific
6:87215902-87218731	1.68571	2.21062	0.911318	1.05128	2.41891	0	0.790749	0.250623	-1.99641	2.07468	0.149884	0.615896	MMU_CIRCpedia_17512
19:48913010-48913564	0.632143	1.53516	0.98142	1.24839	3.20342	2.11695	-0.725309	0.274236	-1.86651	2.06259	0.150991	0.619239	species_specific
3:47635189-47636136	1.89643	2.14922	1.26183	1.90544	1.04601	1.183	0.704754	0.277942	-1.84715	2.04282	0.152963	0.62611	species_specific
16:58582792-58583182	0.421429	0.368437	0	1.83973	0.849887	0.871686	-1.75872	0.140271	-2.83371	2.02844	0.154416	0.630831	species_specific
16:14593300-14604226	0.702381	0	1.12162	1.05128	1.50365	2.24148	-1.02999	0.199735	-2.32384	2.021	0.155174	0.632703	species_specific
14:75775483-75776850	0.421429	0	0	0.854162	0.588383	1.30753	-2.2286	0.113162	-3.14354	1.92607	0.165226	0.672385	species_specific
16:11020192-11061022	1.82619	1.10531	1.47213	1.90544	0.588383	0.747159	0.803947	0.234608	-2.09167	1.88383	0.169936	0.688787	MMU_CIRCpedia_1694
6:18236451-18258405	1.12381	2.02641	2.80406	1.18269	2.54966	1.183	0.605968	0.316323	-1.66053	1.88315	0.170013	0.688787	species_specific
4:128074459-128082305	1.26429	0	2.59375	2.16826	1.76515	3.67353	-0.626085	0.320691	-1.64074	1.88734	0.170236	0.688787	MMU_CIRCpedia_19512
X:77652113-77656653	2.31786	3.07031	4.06588	3.54806	3.66105	1.68111	0.433654	0.503026	-0.991296	1.8529	0.173483	0.700577	species_specific
7:105481051-105482440	0.632143	1.10531	0.420608	1.64262	2.02665	1.43205	-0.890848	0.212905	-2.23172	1.82479	0.176781	0.712532	species_specific
16:1724556-1729578	0.772619	1.10531	0	2.16826	1.04601	1.55658	-0.977613	0.196146	-2.35	1.78993	0.180971	0.728027	species_specific
10:5794884-5800705	2.17738	3.80719	2.17314	6.11055	3.00729	4.60748	-0.397094	0.567025	-0.818515	1.78227	0.181907	0.730401	MMU_CIRCpedia_17757
1:235830225-235833667	0.842857	1.04391	0.630913	2.49678	1.30752	1.80563	-0.791936	0.233364	-2.09935	1.77895	0.182314	0.730642	species_specific
10:34269656-34284245	1.33452	0.798281	1.05152	2.16826	2.02665	2.30374	-0.674135	0.274392	-1.86569	1.7728	0.183072	0.731586	MMU_CIRCpedia_38080
18:56758864-56781656	0.421429	0	0	1.05128	0.719135	0.871686	-2.16951	0.110712	-3.17511	1.76893	0.183551	0.731586	MMU_CIRCpedia_25669
8:38114191-38119363	1.19405	1.10531	0.630913	2.03685	2.28816	1.80563	-0.713154	0.258256	-1.95312	1.76822	0.183639	0.731586	species_specific
13:95757643-95763953	1.26429	2.14922	1.19172	3.67947	1.83053	3.0509	-0.538604	0.355344	-1.49271	1.76342	0.184234	0.731586	species_specific
10:126970701-126990603	1.89643	2.08781	3.01436	4.86216	2.54966	4.60748	-0.425915	0.501811	-0.994785	1.76302	0.184285	0.731586	species_specific
8:108449822-108450492	0.702381	0.49125	0.630913	0.657048	1.56902	2.366	-0.977529	0.194096	-2.36516	1.71821	0.189959	0.751095	species_specific
2:106145189-106166083	0.561905	0	0	0.919867	0	2.05469	-1.94134	0.121563	-3.04022	1.71576	0.190276	0.751095	MMU_CIRCpedia_20156
4:76134174-76144473	0.702381	0.675469	0.630913	1.57692	0.392256	2.92637	-0.914264	0.203573	-2.29638	1.71497	0.190377	0.751095	species_specific
13:32517856-32527532	4.84643	7.00031	5.32771	9.5272	7.97586	9.09043	-0.285701	1.10758	0.147405	1.71146	0.190832	0.751095	species_specific
11:47752915-47754664	1.475	1.84219	1.26183	0.722753	1.04601	1.68111	0.735094	0.243238	-2.03956	1.71031	0.19098	0.751095	species_specific
5:73074741-73077493	0.842857	1.22812	1.05152	2.62819	1.50365	2.24148	-0.670965	0.267238	-1.9038	1.68446	0.194368	0.762443	species_specific
15:93014695-93014909	0.632143	0	0.280406	0.394229	1.50365	1.55658	-1.5331	0.144191	-2.79394	1.68279	0.194589	0.762443	species_specific
3:107710451-107716849	1.68571	1.65797	1.75253	1.11698	1.37289	1.61884	0.64725	0.273675	-1.86946	1.6689	0.196441	0.768271	MMU_CIRCpedia_21789
10:5773841-5800705	0	0.552656	0.420608	1.51121	1.04601	0.996212	-1.48834	0.145011	-2.78577	1.65712	0.198028	0.772496	MMU_CIRCpedia_17759
1:21715388-21721764	3.16071	4.54406	3.15456	5.91343	5.36083	6.16406	-0.338479	0.728644	-0.456714	1.65277	0.198618	0.772496	species_specific
5:124639132-124644661	2.0369	0.552656	0.911318	0.657048	0	1.61884	0.979199	0.188938	-2.40402	1.65275	0.198621	0.772496	MMU_CIRCpedia_22986
5:168566012-168568998	0	1.78078	0	0.328524	0	0	2.52787	0.0920343	-3.44168	1.64048	0.200295	0.776271	MMU_CIRCpedia_17860
16:70565064-70567536	0	0.245625	0	0.657048	0.980639	0.435843	-2.56653	0.0928166	-3.42947	1.63936	0.200448	0.776271	MMU_CIRCpedia_213594
11:107390073-107418287	1.54524	1.90359	0.98142	3.74517	3.07267	1.36979	-0.532427	0.34447	-1.53755	1.63756	0.200696	0.776271	MMU_CIRCpedia_17283
1:21715388-21724095	0.632143	1.53516	0	0	0	0.622633	1.99415	0.110625	-3.17625	1.6257	0.202334	0.781172	MMU_CIRCpedia_8530
8:140818276-140864399	0	0	0.630913	2.10255	0.457631	0.498106	-1.8289	0.124677	-3.00373	1.61831	0.203363	0.783136	MMU_CIRCpedia_222055
3:158122102-158123991	3.37143	2.9475	2.66385	5.78202	3.98793	4.98106	-0.363086	0.618882	-0.692264	1.61671	0.203586	0.783136	MMU_CIRCpedia_26681
20:35713018-35725155	0	1.04391	0	1.18269	0.915263	1.49432	-1.42502	0.146656	-2.76949	1.60709	0.204936	0.786894	species_specific
9:33948373-33956146	0.632143	0.798281	0.911318	0	0	0.809422	1.80267	0.121628	-3.03945	1.59206	0.207067	0.793632	species_specific
6:4891712-4892379	25.4964	33.6506	26.9189	32.0639	30.1383	34.3071	0.17622	4.58871	2.19809	1.58576	0.207969	0.795402	MMU_CIRCpedia_17892
15:66435026-66436892	0.913095	1.16672	0	0.985572	2.02665	1.80563	-0.868529	0.204803	-2.28769	1.58356	0.208284	0.795402	MMU_CIRCpedia_25807
7:149018991-149021147	2.17738	2.33344	1.61233	2.6939	4.11868	3.67353	-0.435006	0.445301	-1.16715	1.57503	0.209513	0.798651	species_specific
2:68490189-68545312	0.35119	0.429844	0.98142	0	0.392256	0	2.34019	0.0967597	-3.36945	1.56662	0.210733	0.801703	species_specific
12:32607956-32611283	1.75595	2.82469	1.33193	2.62819	1.50365	0.996212	0.550194	0.315307	-1.66517	1.56305	0.211254	0.801703	species_specific
X:136241159-136244795	1.475	0.9825	1.61233	1.3798	0.588383	1.05848	0.7809	0.220746	-2.17954	1.56167	0.211455	0.801703	species_specific
4:41013582-41014398	0.983333	2.88609	2.38345	1.97114	1.6344	1.8679	0.526969	0.332796	-1.58729	1.55808	0.211981	0.802257	MMU_CIRCpedia_26534
15:29766265-29772166	0.491667	0	0.280406	0.657048	0.980639	1.55658	-1.63918	0.133567	-2.90436	1.54043	0.214589	0.810293	species_specific
7:98190727-98194572	1.12381	2.27203	2.10304	3.41665	3.98793	2.17921	-0.45764	0.406168	-1.29985	1.53851	0.214874	0.810293	MMU_CIRCpedia_9451
1:245002120-245017326	0	0	0.701014	1.11698	0.653759	1.30753	-1.71401	0.128038	-2.96536	1.51832	0.217908	0.820269	species_specific
14:31168297-31169468	0	0.429844	0	1.3798	1.04601	0	-2.06914	0.104943	-3.25233	1.49471	0.221522	0.832385	species_specific
20:41512845-41514952	0.913095	0.921094	0	0.854162	1.30752	2.30374	-0.93052	0.189961	-2.39622	1.49165	0.221995	0.83268	MMU_CIRCpedia_222951
4:10097710-10103986	1.61548	2.39484	1.47213	3.81088	2.61504	3.11316	-0.447559	0.4026	-1.31258	1.45941	0.227058	0.850158	MMU_CIRCpedia_18932
8:140700890-140706205	0.421429	0.9825	0	1.05128	1.17677	1.68111	-1.12393	0.164629	-2.60271	1.44739	0.228981	0.855835	MMU_CIRCpedia_28331
2:206127796-206130242	0.491667	0.614062	1.05152	1.77403	1.04601	2.05469	-0.811915	0.208018	-2.26522	1.43255	0.231382	0.863281	species_specific
10:15128349-15141557	0.561905	0.245625	0.701014	0	0	0.311316	2.45277	0.0878298	-3.50915	1.41203	0.234754	0.872937	MMU_CIRCpedia_16771
18:21765771-21779685	0.491667	1.65797	1.40203	2.49678	1.50365	2.73958	-0.572494	0.286236	-1.80472	1.41176	0.234799	0.872937	MMU_CIRCpedia_2078
X:53405011-53405391	0.491667	0.614062	0	1.05128	1.11139	1.36979	-1.30461	0.148772	-2.74883	1.40065	0.236648	0.878264	species_specific
3:171188701-171194635	1.89643	3.50016	1.26183	4.0737	3.92256	3.11316	-0.393609	0.469214	-1.09168	1.39611	0.237409	0.879538	MMU_CIRCpedia_15223
21:44855209-44861271	1.475	1.10531	2.17314	3.28524	2.35353	2.80185	-0.474092	0.361477	-1.46803	1.38749	0.238863	0.881133	species_specific
1:179131310-179133374	0	0.859687	0	1.3798	0.588383	1.24527	-1.5283	0.133046	-2.91001	1.3871	0.238928	0.881133	species_specific
1:227193785-227254155	0.421429	0.49125	0.49071	0	0	0.249053	2.59064	0.0828444	-3.59345	1.38613	0.239093	0.881133	MMU_CIRCpedia_12236
2:63856305-63857936	1.68571	1.16672	1.19172	3.08813	2.22278	2.11695	-0.520292	0.318408	-1.65105	1.38228	0.239746	0.881999	MMU_CIRCpedia_13221
7:69899285-69899498	1.33452	0.736875	1.96284	0.854162	1.30752	0.933949	0.724181	0.22316	-2.16385	1.37271	0.24138	0.88646	MMU_CIRCpedia_7790
4:73090666-73092300	0.491667	0.307031	0.420608	1.05128	1.56902	0.996212	-1.19808	0.155192	-2.68787	1.34391	0.246379	0.901162	species_specific
8:22474953-22475624	1.40476	0.429844	1.75253	3.67947	2.28816	0.809422	-0.552589	0.292651	-1.77275	1.34306	0.246528	0.901162	MMU_CIRCpedia_27443
6:144537581-144542870	1.75595	0.859687	1.19172	1.64262	2.61504	2.73958	-0.531841	0.304548	-1.71526	1.34228	0.246665	0.901162	species_specific
2:36877890-36894033	0	0.245625	0	0.657048	0.588383	0.622633	-2.41519	0.0878313	-3.50912	1.33014	0.248813	0.907274	MMU_CIRCpedia_29976
10:110596397-110598290	9.97381	11.9128	7.50085	16.4262	10.9832	15.7526	-0.206334	1.81339	0.858688	1.32577	0.249592	0.907274	MMU_CIRCpedia_215720
6:163455278-163535125	0	0.368437	0.701014	1.3141	1.37289	0.747159	-1.31045	0.146043	-2.77554	1.32556	0.24963	0.907274	MMU_CIRCpedia_706
1:180984676-180993425	2.31786	4.48266	2.03294	2.89101	3.98793	1.68111	0.378608	0.473653	-1.0781	1.32164	0.250331	0.908258	MMU_CIRCpedia_10571
2:85368685-85371562	0.702381	0	0.630913	1.44551	0.653759	1.68111	-1.10634	0.161777	-2.62792	1.30128	0.254012	0.918324	species_specific
7:27785162-27785489	0.491667	0.307031	0.350507	2.43108	0	1.183	-1.23612	0.15045	-2.73264	1.30027	0.254196	0.918324	MMU_CIRCpedia_215289
8:140830471-140864399	0.491667	0	0	1.51121	0.719135	0.249053	-1.86022	0.108695	-3.20165	1.29909	0.254412	0.918324	species_specific
8:48043032-48049978	0.421429	0.429844	0.49071	0	0	0.249053	2.53358	0.081243	-3.62161	1.28919	0.25623	0.923303	species_specific
15:63706779-63716473	0.842857	0.859687	1.26183	1.05128	0.719135	0	1.08386	0.161116	-2.63383	1.28288	0.257397	0.925927	MMU_CIRCpedia_220697
12:128814774-128815070	0	0.429844	0	0.591343	0.849887	0.809422	-1.97996	0.101426	-3.3015	1.27741	0.258414	0.926545	species_specific
1:51402434-51408332	0	0.675469	0	1.3798	0	1.43205	-1.65562	0.11881	-3.07327	1.27722	0.258448	0.926545	MMU_CIRCpedia_2587
3:32541036-32545965	0	0	0.630913	0.985572	0.980639	0.747159	-1.68467	0.118296	-3.07952	1.26898	0.25999	0.930492	MMU_CIRCpedia_3734
9:33271151-33278225	0.561905	0.859687	0	0.459934	1.43827	1.8679	-1.06073	0.163071	-2.61643	1.25461	0.262705	0.938613	species_specific
6:13632369-13644729	1.96667	1.10531	0.420608	1.24839	0.457631	0.809422	0.826888	0.192506	-2.37703	1.25029	0.263528	0.939961	MMU_CIRCpedia_20067
1:150492410-150496908	0	0.429844	0.280406	1.51121	0.719135	0.622633	-1.60523	0.12193	-3.03588	1.24761	0.264041	0.940201	species_specific
1:15638306-15643650	1.96667	1.78078	0.771115	0.854162	1.30752	1.55658	0.612432	0.248173	-2.01058	1.23901	0.265693	0.944487	MMU_CIRCpedia_9117
15:90441505-90443478	0.983333	1.47375	1.05152	2.03685	2.09203	2.366	-0.540846	0.281452	-1.82904	1.21789	0.269807	0.957496	species_specific
5:94909250-94912976	0.35119	0	0	0.854162	0.392256	0.871686	-2.07922	0.0967512	-3.36958	1.21173	0.271022	0.960193	MMU_CIRCpedia_29420
4:53383772-53389873	3.02024	2.70187	1.82264	3.28524	1.04601	2.98864	0.39767	0.411357	-1.28154	1.20227	0.2729	0.965224	species_specific
1:51834016-51840514	0	0.307031	0	0.854162	0.588383	0.498106	-2.19178	0.090879	-3.45991	1.19987	0.273379	0.9653	species_specific
1:245002120-245059458	0	0	0.49071	1.3141	1.04601	0	-1.81915	0.106215	-3.23494	1.18891	0.275581	0.971445	species_specific
6:18256360-18258405	0.561905	0	0.701014	0.788458	1.56902	1.183	-1.1114	0.155802	-2.68222	1.16933	0.27957	0.983863	species_specific
12:122511108-122515227	0.842857	0.798281	0.630913	1.97114	1.11139	1.74337	-0.722246	0.20978	-2.25305	1.16651	0.280149	0.984259	species_specific
9:96458378-96471094	0.421429	2.45625	2.10304	3.02242	3.5303	1.93016	-0.427368	0.365485	-1.45211	1.16211	0.281059	0.985811	species_specific
18:57611636-57615975	0	0	0.701014	0.657048	0.849887	1.24527	-1.5634	0.121258	-3.04385	1.15593	0.282341	0.987861	species_specific
4:169537808-169556095	0.280952	0	0.420608	0.591343	1.6344	0.498106	-1.56046	0.121613	-3.03963	1.15478	0.282581	0.987861	MMU_CIRCpedia_25011
1:1815755-1839238	2.31786	2.39484	1.12162	3.35094	3.85718	2.49053	-0.387345	0.418591	-1.25639	1.1522	0.283119	0.988105	MMU_CIRCpedia_10606
6:30670409-30671274	3.16071	3.50016	2.24324	2.49678	1.69977	4.66974	0.348097	0.483787	-1.04756	1.14677	0.284258	0.990438	species_specific
5:73840479-73840760	0.561905	0.614062	0.420608	0.459934	0	0	2.05794	0.0925721	-3.43328	1.14069	0.285538	0.990641	species_specific
4:128074459-128077962	3.65238	3.99141	2.59375	6.17625	4.18406	5.60369	-0.29043	0.678602	-0.559363	1.13931	0.285828	0.990641	MMU_CIRCpedia_19511
18:9195550-9221999	0.983333	0	0	0.854162	1.04601	1.30753	-1.30079	0.140004	-2.83646	1.13907	0.28588	0.990641	MMU_CIRCpedia_26407
5:180238331-180241155	3.37143	5.52656	3.71537	4.86216	3.13804	5.10559	0.288396	0.67857	-0.559431	1.13758	0.286196	0.990641	species_specific
6:170317369-170330550	0.35119	0	0	0.722753	0.457631	0.871686	-2.03811	0.095423	-3.38952	1.13136	0.287516	0.99358	MMU_CIRCpedia_10502
2:36396613-36442735	0.421429	0	0.350507	1.3798	0.653759	0.871686	-1.48345	0.126155	-2.98673	1.12691	0.288466	0.994893	MMU_CIRCpedia_29836
14:34800223-34802988	0.421429	0	0	0.854162	0.588383	0.747159	-1.89384	0.100541	-3.31414	1.12516	0.28884	0.994893	species_specific
4:2949933-2953645	0.702381	1.41234	1.33193	2.89101	1.24214	2.24148	-0.528431	0.275419	-1.8603	1.11871	0.290227	0.996476	species_specific
1:28473553-28476291	0.561905	0	0.420608	1.18269	0.719135	1.30753	-1.29815	0.139217	-2.84459	1.11863	0.290245	0.996476	species_specific
1:28476106-28480604	0	0	0.350507	0.657048	0.784511	0.560369	-2.03338	0.0944672	-3.40404	1.10549	0.293094	0.999816	species_specific
20:63775677-63790790	2.17738	3.62297	1.89274	2.62819	2.81116	2.05469	0.375052	0.418541	-1.25656	1.09906	0.294502	0.999816	MMU_CIRCpedia_12383
4:73085248-73092300	0.702381	0.552656	0	0	0.261504	0	2.34221	0.0791928	-3.65849	1.07104	0.300741	0.999816	species_specific
5:36953617-36976402	0	0.736875	0.771115	0	0.392256	0	2.07488	0.0887315	-3.49441	1.06158	0.302885	0.999816	MMU_CIRCpedia_213897
2:112299848-112300029	9.48214	11.483	12.0574	14.2579	11.833	10.8961	0.184523	1.7878	0.838182	1.05289	0.304871	0.999816	MMU_CIRCpedia_7313
6:148471416-148474222	0	0.859687	0	0.525638	0.980639	1.36979	-1.39965	0.126555	-2.98216	1.04916	0.305731	0.999816	species_specific
5:132892163-132893118	2.17738	3.37734	0.630913	1.05128	2.15741	2.55279	0.426272	0.337604	-1.56659	1.04727	0.306165	0.999816	MMU_CIRCpedia_22620
14:92070934-92082466	0	0.736875	0.280406	1.64262	0	1.55658	-1.26768	0.13666	-2.87133	1.04249	0.307272	0.999816	species_specific
14:39276933-39279537	0	0.49125	0	0.919867	0.719135	0.560369	-1.76781	0.101463	-3.30097	1.04185	0.30742	0.999816	MMU_CIRCpedia_24401
7:98191613-98194572	0	0.49125	0	0.854162	1.30752	0	-1.76346	0.101225	-3.30437	1.03007	0.310172	0.999816	MMU_CIRCpedia_223416
15:57992704-58014281	0	0.429844	0	0.459934	0.719135	0.871686	-1.85674	0.0969126	-3.36717	1.01789	0.313049	0.999816	species_specific
5:112985834-113001674	1.33452	0.429844	0.630913	0.394229	0.849887	0	1.26812	0.134943	-2.88958	1.01668	0.313336	0.999816	MMU_CIRCpedia_20303
13:79370944-79371930	0.702381	0.614062	0.49071	0	0	0.684896	1.66778	0.104099	-3.26397	1.01621	0.313449	0.999816	species_specific
9:35295695-35313989	0.280952	0.9825	0.771115	0	0.588383	0.249053	1.51452	0.113512	-3.13909	1.01275	0.314273	0.999816	species_specific
11:36227084-36227430	0	0	0.771115	0.854162	0.784511	1.12074	-1.43074	0.123176	-3.0212	1.00987	0.314962	0.999816	species_specific
19:45277922-45280734	0.772619	0	0.630913	1.3141	1.24214	1.05848	-0.978232	0.160832	-2.63637	1.00874	0.315235	0.999816	MMU_CIRCpedia_12729
17:48112030-48113401	1.05357	0.49125	0.630913	0	0.392256	0.622633	1.39972	0.12297	-3.02362	1.00458	0.316233	0.999816	species_specific
11:33286412-33287511	3.30119	2.9475	1.96284	4.73075	2.87654	5.29238	-0.29954	0.554834	-0.849871	0.989763	0.319829	0.999816	MMU_CIRCpedia_1229
2:47822217-47823360	0	0	0.630913	0.722753	0.980639	0.747159	-1.54278	0.112574	-3.15105	0.989368	0.319925	0.999816	species_specific
1:117402185-117420649	30.694	35.3086	24.6056	42.7738	37.7219	45.7012	-0.133912	5.37396	2.42599	0.978209	0.32267	0.999816	MMU_CIRCpedia_240
2:95851693-95860074	0.842857	0.49125	0.420608	0	0.653759	0	1.66392	0.102891	-3.28082	0.974638	0.323555	0.999816	species_specific
3:27437387-27448797	0.842857	0.614062	0.841217	1.83973	1.8959	0.933949	-0.664761	0.208582	-2.26131	0.972413	0.324108	0.999816	species_specific
9:33986759-33998864	1.40476	1.84219	0	1.90544	1.8959	2.11695	-0.519335	0.260056	-1.94311	0.971603	0.324309	0.999816	species_specific
19:5604582-5604936	5.54881	6.44765	9.8843	12.7467	8.04124	11.2696	-0.197097	1.36575	0.449695	0.97085	0.324496	0.999816	species_specific
21:15014343-15043574	6.04048	9.27234	8.27196	13.2724	9.218	11.7678	-0.191205	1.455	0.541021	0.966578	0.325563	0.999816	MMU_CIRCpedia_29317
9:5968018-5988545	0.35119	1.84219	1.12162	0.525638	1.17677	0.684896	0.771516	0.182857	-2.45121	0.958564	0.327577	0.999816	MMU_CIRCpedia_15578
12:122340752-122341697	1.12381	0.9825	0	0.722753	1.96128	1.68111	-0.710174	0.196243	-2.34929	0.957364	0.32788	0.999816	species_specific
2:190900563-190924593	0	0.552656	0.350507	0.985572	1.6344	0.249053	-1.31529	0.12872	-2.95769	0.956744	0.328037	0.999816	species_specific
5:65170616-65197151	0	0.245625	0	0	1.50365	0	-2.18684	0.0809138	-3.62747	0.953338	0.328899	0.999816	species_specific
3:47610065-47678311	0.632143	0.552656	0.49071	0	0.588383	0	1.72902	0.0988406	-3.33875	0.950828	0.329537	0.999816	species_specific
3:179764001-179765848	1.12381	0.614062	1.12162	1.3141	0.32688	0.311316	0.916995	0.162432	-2.62209	0.949235	0.329942	0.999816	species_specific
5:38990948-39003622	0.772619	1.16672	0	0	0	0.809422	1.50781	0.10939	-3.19245	0.944694	0.331102	0.999816	species_specific
15:76274411-76295737	0.421429	0	0	0.262819	0.457631	1.30753	-1.79132	0.097222	-3.36257	0.937622	0.332918	0.999816	MMU_CIRCpedia_23171
7:105142007-105143330	0.702381	0.429844	0.701014	0	0.32688	0.435843	1.54224	0.107377	-3.21925	0.936382	0.333238	0.999816	species_specific
8:42957093-42964474	1.12381	0.859687	1.47213	1.51121	0.849887	0.37358	0.693414	0.196899	-2.34448	0.933811	0.333902	0.999816	species_specific
2:201145377-201149835	10.325	9.76359	8.13176	10.3157	10.0679	11.2074	0.183654	1.53584	0.619024	0.932906	0.334137	0.999816	species_specific
3:172247532-172251541	4.28452	5.09672	5.2576	3.54806	7.3221	4.73201	0.242475	0.801117	-0.319915	0.928999	0.335151	0.999816	MMU_CIRCpedia_14977
3:37121491-37149038	0.35119	0.552656	0.350507	0.328524	0	0	2.13362	0.0800731	-3.64254	0.923014	0.336712	0.999816	species_specific
14:103778744-103797518	0.280952	0.307031	0	0.591343	0.523007	1.183	-1.55684	0.106977	-3.22463	0.920416	0.337393	0.999816	species_specific
6:75634706-75678927	0.491667	0	0	0.591343	0.980639	0.560369	-1.66725	0.101816	-3.29596	0.918214	0.337972	0.999816	species_specific
4:177353307-177353728	0.35119	0.552656	0	1.3141	0.523007	1.05848	-1.29224	0.128122	-2.96441	0.917242	0.338228	0.999816	species_specific
5:138006989-138011149	0	0.245625	0	0.591343	0.32688	0.622633	-2.15018	0.0802692	-3.63901	0.915289	0.338743	0.999816	species_specific
2:202555251-202556531	0	0	0.350507	0.591343	0.32688	0.933949	-1.90705	0.0907106	-3.46258	0.91251	0.339477	0.999816	MMU_CIRCpedia_24700
5:176943334-176951577	0.421429	0.552656	0.771115	1.44551	1.17677	1.30753	-0.807428	0.1757	-2.50881	0.91073	0.339948	0.999816	MMU_CIRCpedia_38779
4:39326562-39327756	1.96667	1.16672	0	2.10255	1.76515	1.8679	-0.515004	0.254877	-1.97213	0.909739	0.340211	0.999816	MMU_CIRCpedia_26145
9:33996222-34017189	0	0.9825	0.49071	1.24839	1.30752	0.996212	-0.927229	0.158403	-2.65833	0.890624	0.345335	0.999816	MMU_CIRCpedia_213096
10:104008176-104018908	1.19405	0.9825	1.33193	1.18269	0.523007	1.12074	0.662263	0.200018	-2.3218	0.89045	0.345382	0.999816	species_specific
22:20933778-20934244	0.280952	0.859687	1.12162	2.03685	0.915263	1.61884	-0.652395	0.203058	-2.30004	0.884801	0.346917	0.999816	MMU_CIRCpedia_11958
16:89305205-89317078	1.05357	2.45625	1.96284	1.83973	1.50365	1.80563	0.424743	0.30443	-1.71582	0.884791	0.34692	0.999816	species_specific
2:101855976-101859864	1.05357	0.921094	0.701014	1.77403	2.28816	0.996212	-0.569122	0.227757	-2.13443	0.881428	0.347838	0.999816	MMU_CIRCpedia_39983
1:50490587-50535457	1.19405	0.921094	0.771115	0	0.784511	1.183	0.865873	0.164193	-2.60654	0.878033	0.348768	0.999816	MMU_CIRCpedia_2698
17:81667728-81672155	0.913095	0	0.49071	0	0.457631	0	1.86343	0.0893595	-3.48423	0.877371	0.34895	0.999816	species_specific
8:98706466-98707311	0.632143	1.22812	1.54223	1.77403	1.76515	2.49053	-0.478668	0.268446	-1.89729	0.873558	0.349999	0.999816	MMU_CIRCpedia_17597
2:230449560-230506445	0.702381	0.49125	0	0	0	0.311316	2.09767	0.0785144	-3.6709	0.869136	0.351221	0.999816	species_specific
2:73557219-73559142	0.561905	0.921094	0	0	0.457631	0	1.84264	0.0894427	-3.48289	0.867387	0.351706	0.999816	species_specific
3:125313307-125331238	2.17738	2.9475	2.52365	4.33652	3.5303	4.04711	-0.291691	0.517122	-0.951423	0.86665	0.351911	0.999816	MMU_CIRCpedia_16907
18:12370848-12371691	0	0.552656	0	0.788458	0.849887	0.498106	-1.58264	0.10184	-3.29562	0.856924	0.354628	0.999816	species_specific
1:23030468-23059167	0	0.429844	0	1.18269	0.32688	0.435843	-1.75756	0.0936227	-3.417	0.853631	0.355554	0.999816	MMU_CIRCpedia_8443
3:32733422-32734976	0	0.429844	0	0.591343	0.392256	0.933949	-1.7539	0.0935136	-3.41868	0.848525	0.356996	0.999816	species_specific
1:28473553-28474151	0.561905	0.859687	0	0.459934	0	0	1.86428	0.0871242	-3.52078	0.84558	0.357832	0.999816	species_specific
10:103439745-103440850	0.632143	1.84219	0.841217	2.36537	1.17677	2.366	-0.48207	0.260191	-1.94236	0.841796	0.35891	0.999816	species_specific
19:18539370-18539720	1.54524	2.51766	1.40203	1.77403	1.17677	2.24148	0.412282	0.304903	-1.71358	0.836971	0.360291	0.999816	species_specific
9:75016267-75017448	0.561905	0	0.560811	0.919867	1.43827	0.747159	-1.08201	0.141801	-2.81806	0.833831	0.361193	0.999816	MMU_CIRCpedia_12552
20:32788853-32792770	0.983333	0.614062	1.26183	0.985572	1.04601	0	0.837851	0.165178	-2.5979	0.832915	0.361457	0.999816	species_specific
8:103404775-103407784	1.12381	1.16672	0.911318	2.49678	1.69977	1.55658	-0.488339	0.256404	-1.96351	0.829539	0.362432	0.999816	species_specific
14:63998913-64022863	0.421429	0	0.701014	0	0	0.311316	2.06832	0.0773659	-3.69216	0.824255	0.363965	0.999816	species_specific
11:46808030-46809874	0	0.245625	0	0.788458	0	0.684896	-2.06881	0.0783084	-3.67469	0.823031	0.364321	0.999816	species_specific
11:68583042-68596218	0	0.245625	0	0.854162	0.588383	0	-2.06644	0.0780614	-3.67925	0.816152	0.366333	0.999816	species_specific
14:21503172-21503881	0	0.675469	0.280406	1.51121	0.719135	0.622633	-1.20795	0.128196	-2.96357	0.810965	0.367861	0.999816	species_specific
X:53987077-53987944	2.0369	2.08781	1.19172	2.6939	4.31481	1.55658	-0.347052	0.380388	-1.39446	0.808162	0.36869	0.999816	species_specific
8:68017845-68044590	0.421429	0	0.560811	0	0	0.249053	2.15417	0.0719701	-3.79646	0.806027	0.369323	0.999816	MMU_CIRCpedia_2934
18:12999420-13019206	0	0.552656	0	0.394229	1.04601	0.622633	-1.55067	0.100675	-3.31222	0.802273	0.37044	0.999816	species_specific
5:14673641-14681607	0.983333	0.614062	0.280406	1.77403	1.17677	1.05848	-0.724491	0.181132	-2.46488	0.802222	0.370455	0.999816	MMU_CIRCpedia_14996
8:68017845-68030658	2.31786	0.9825	1.19172	4.0737	2.15741	1.30753	-0.381214	0.333997	-1.58209	0.800254	0.371043	0.999816	MMU_CIRCpedia_217905
8:39090046-39091346	0.421429	0.614062	0.701014	0.459934	0	0.311316	1.47764	0.103584	-3.27113	0.798559	0.37155	0.999816	species_specific
1:66891153-66905375	0	1.10531	0.771115	0.854162	1.69977	1.36979	-0.733656	0.178503	-2.48598	0.797316	0.371922	0.999816	species_specific
2:44201185-44218537	0.35119	0	0	0.591343	0.653759	0.498106	-1.81389	0.0887148	-3.49468	0.795354	0.372511	0.999816	MMU_CIRCpedia_31899
18:42027442-42049605	0	0.736875	0	0.985572	0.849887	0.560369	-1.3504	0.112206	-3.15578	0.787565	0.374863	0.999816	species_specific
20:33366858-33370629	1.05357	0	0.630913	0	0.392256	0.37358	1.45145	0.104471	-3.25883	0.779921	0.37719	0.999816	MMU_CIRCpedia_10520
8:43059091-43064215	0	0.921094	0	0.525638	0.980639	1.183	-1.21715	0.123944	-3.01224	0.775003	0.378699	0.999816	MMU_CIRCpedia_14693
2:99169549-99171429	0.421429	0.49125	0	0.328524	1.37289	0.996212	-1.21	0.125729	-2.99161	0.774858	0.378743	0.999816	species_specific
2:11286538-11287736	0	1.41234	1.54223	1.24839	0.523007	0.37358	0.789478	0.166917	-2.5828	0.774309	0.378912	0.999816	MMU_CIRCpedia_11756
11:119126934-119127125	0.491667	1.90359	0.701014	0.722753	1.17677	0.37358	0.742352	0.173804	-2.52447	0.772341	0.379519	0.999816	species_specific
14:90978305-91001159	0.632143	0.307031	0.420608	0	0.457631	0	1.78068	0.0873227	-3.5175	0.771679	0.379723	0.999816	MMU_CIRCpedia_245
5:32135571-32143880	0	0.245625	0	1.44551	0	0	-2.02267	0.0771591	-3.69602	0.771662	0.379728	0.999816	species_specific
2:32478634-32479617	0.983333	0.798281	0	0.394229	0	0.435843	1.40369	0.106081	-3.23676	0.76669	0.381268	0.999816	species_specific
1:149959683-149964349	1.05357	0.552656	1.19172	2.03685	2.15741	0.933949	-0.51751	0.233616	-2.09779	0.765324	0.381693	0.999816	species_specific
6:73466208-73466606	1.68571	0.368437	0.630913	1.05128	0	0.871686	0.861007	0.15759	-2.66575	0.76512	0.381756	0.999816	MMU_CIRCpedia_214046
6:47283937-47286595	0.280952	0	0.630913	0.788458	0.784511	1.183	-1.1923	0.127251	-2.97425	0.761814	0.382786	0.999816	MMU_CIRCpedia_19989
1:35358924-35361789	0.421429	0.307031	0.911318	1.18269	1.11139	1.36979	-0.791183	0.167567	-2.57719	0.761181	0.382984	0.999816	MMU_CIRCpedia_6783
22:32478980-32485209	0.280952	0	0	0.854162	0.392256	0.311316	-1.92167	0.0820858	-3.60672	0.757244	0.384217	0.999816	species_specific
7:39987598-40002031	0	0.798281	1.54223	1.3798	1.50365	1.61884	-0.596327	0.204938	-2.28674	0.756936	0.384314	0.999816	MMU_CIRCpedia_12127
8:67103036-67137603	0	0	0.420608	0.459934	0.457631	0.933949	-1.67531	0.0928658	-3.42871	0.752601	0.385679	0.999816	MMU_CIRCpedia_287
5:177041125-177050936	0	0	0.420608	0.394229	0.457631	0.996212	-1.67432	0.0928391	-3.42912	0.751384	0.386063	0.999816	MMU_CIRCpedia_23081
20:10556230-10560820	0.491667	0.429844	0.560811	0.591343	0	0	1.64119	0.0926363	-3.43228	0.748893	0.386852	0.999816	MMU_CIRCpedia_37681
7:105459167-105465414	0	0.307031	0	0.459934	0.457631	0.622633	-1.88956	0.0820385	-3.60756	0.748744	0.386899	0.999816	species_specific
9:109057190-109064567	0	0	0.350507	0.854162	0.588383	0.249053	-1.78061	0.087105	-3.5211	0.742864	0.38877	0.999816	MMU_CIRCpedia_39697
14:30955619-30956242	0	0.675469	0	0.919867	0.457631	0.871686	-1.37257	0.107024	-3.224	0.737673	0.390432	0.999816	MMU_CIRCpedia_22144
6:3076763-3077935	1.475	1.65797	0	0.722753	1.30752	0.37358	0.693822	0.179156	-2.48071	0.732641	0.392053	0.999816	species_specific
16:16124788-16125911	0.491667	0	0	0.788458	0.457631	0.747159	-1.54754	0.0980199	-3.35078	0.730289	0.392814	0.999816	species_specific
15:76728594-76733384	0	0.798281	0	0.722753	0.653759	1.05848	-1.2653	0.114653	-3.12465	0.72457	0.394673	0.999816	species_specific
2:187484123-187503770	1.26429	1.41234	2.80406	2.6939	1.76515	0.933949	0.377246	0.31333	-1.67424	0.721365	0.395721	0.999816	species_specific
11:116757145-116758407	0.491667	0	0.630913	1.70832	0	1.36979	-1.02987	0.139047	-2.84636	0.719622	0.396292	0.999816	species_specific
10:31461036-31502509	0	0.552656	0.420608	0.722753	0.849887	1.183	-1.143	0.127542	-2.97095	0.718616	0.396622	0.999816	MMU_CIRCpedia_23737
1:154234590-154235291	5.05714	9.21094	5.2576	9.33008	6.34146	6.1018	0.186292	1.06005	0.0841305	0.708964	0.399812	0.999816	MMU_CIRCpedia_33611
8:18011236-18011827	0	0	0.350507	0.394229	0.261504	0.996212	-1.7458	0.0862738	-3.53493	0.703502	0.401633	0.999816	species_specific
2:47834578-47834871	0	0.245625	0	0.657048	0	0.684896	-1.94581	0.0754425	-3.72848	0.697129	0.403774	0.999816	MMU_CIRCpedia_32982
1:151166933-151167414	0.280952	0	0	0.525638	0.457631	0.498106	-1.86315	0.080668	-3.63186	0.696572	0.403962	0.999816	species_specific
16:1625972-1641187	0	1.04391	0	0	0.261504	0	1.97807	0.0720804	-3.79425	0.693522	0.404993	0.999816	MMU_CIRCpedia_14341
20:41533049-41551360	0	1.16672	0.841217	1.44551	1.50365	1.05848	-0.657801	0.183287	-2.44782	0.692557	0.405319	0.999816	MMU_CIRCpedia_11190
14:99458278-99465813	2.59881	0.736875	2.66385	2.10255	1.76515	2.17921	0.343747	0.346347	-1.52971	0.69142	0.405705	0.999816	MMU_CIRCpedia_2248
7:155665174-155680908	2.0369	2.70187	1.26183	2.10255	1.6344	2.24148	0.346027	0.337848	-1.56555	0.688863	0.406575	0.999816	MMU_CIRCpedia_15161
20:2964271-2965202	0	0.49125	0.49071	0	1.50365	1.183	-1.11823	0.127607	-2.97022	0.687507	0.407037	0.999816	MMU_CIRCpedia_7519
X:53614533-53615835	0.772619	1.10531	0.701014	1.90544	2.02665	0.809422	-0.529719	0.216807	-2.20551	0.687266	0.407119	0.999816	MMU_CIRCpedia_10266
6:35857260-35872728	0	0.245625	0	0	0	1.30753	-1.93242	0.0751863	-3.73339	0.685554	0.407704	0.999816	MMU_CIRCpedia_15242
2:27599582-27601442	0.913095	0	0.911318	1.44551	0.719135	1.68111	-0.689168	0.177413	-2.49481	0.679831	0.409668	0.999816	MMU_CIRCpedia_16150
1:223804173-223806947	0	0.675469	0.560811	0	0.392256	0	1.78377	0.0812416	-3.62164	0.674414	0.41154	0.999816	species_specific
8:70159504-70162854	0.421429	0	0.701014	0.394229	0	0	1.82078	0.0789709	-3.66254	0.669614	0.413209	0.999816	species_specific
8:29009071-29018913	0	0.49125	0	0.788458	1.04601	0	-1.54158	0.0936589	-3.41644	0.668505	0.413596	0.999816	MMU_CIRCpedia_25952
2:187496880-187529485	0.491667	1.04391	0	0	0	0.622633	1.51738	0.0939573	-3.41185	0.668337	0.413655	0.999816	species_specific
15:51869216-51902036	1.05357	0.368437	0	0.459934	1.56902	1.24527	-0.844306	0.153826	-2.70063	0.667421	0.413975	0.999816	MMU_CIRCpedia_29080
13:106557047-106559657	0	1.65797	0.771115	0.394229	0.523007	0.560369	0.985963	0.136935	-2.86844	0.661254	0.41614	0.999816	MMU_CIRCpedia_32625
1:10440346-10442441	0.913095	0.736875	0	1.90544	0.523007	1.183	-0.751279	0.164556	-2.60335	0.658715	0.417037	0.999816	species_specific
8:140846259-140864399	0.632143	0.859687	0.560811	0.985572	1.30752	1.74337	-0.627673	0.186546	-2.4224	0.658383	0.417154	0.999816	MMU_CIRCpedia_28390
7:92294888-92319512	0	0.614062	0.49071	0	0.32688	0	1.85452	0.0761322	-3.71535	0.656787	0.417719	0.999816	MMU_CIRCpedia_18606
14:24211414-24211829	0.842857	0.798281	0.701014	0	1.43827	0	0.982575	0.137532	-2.86216	0.653616	0.418846	0.999816	species_specific
1:29154695-29154910	3.8631	5.03531	3.99578	6.899	4.44556	7.53385	-0.201302	0.81648	-0.29251	0.651543	0.419584	0.999816	species_specific
9:111570090-111586165	0.280952	0	0	0	1.37289	0	-1.81924	0.0794095	-3.65455	0.649434	0.420338	0.999816	species_specific
1:108148278-108161293	0.842857	0.614062	0	0	0.588383	0	1.52176	0.0926218	-3.4325	0.645884	0.421611	0.999816	MMU_CIRCpedia_221989
12:69251128-69262562	1.61548	1.59656	1.12162	0.788458	1.37289	1.8679	0.43725	0.250298	-1.99828	0.644696	0.422038	0.999816	MMU_CIRCpedia_4243
10:119038237-119038439	0	1.35094	1.61233	1.24839	1.04601	0	0.692168	0.171273	-2.54563	0.641792	0.423085	0.999816	MMU_CIRCpedia_24969
20:35721739-35725155	0.702381	0.368437	0.560811	1.77403	0.915263	0.871686	-0.744915	0.164353	-2.60513	0.640163	0.423674	0.999816	species_specific
2:61522610-61533903	1.12381	1.10531	2.38345	1.90544	2.81116	2.67732	-0.33801	0.335496	-1.57563	0.635712	0.42529	0.999816	MMU_CIRCpedia_13728
3:172251259-172307501	0	0.614062	0.630913	1.24839	1.11139	0.684896	-0.93393	0.141392	-2.82223	0.633944	0.425935	0.999816	species_specific
16:16111374-16111582	0.35119	0	0.420608	0	0.719135	1.61884	-1.19813	0.114451	-3.1272	0.633667	0.426036	0.999816	species_specific
1:7777159-7778169	2.10714	4.42125	2.66385	4.27081	3.66105	5.72822	-0.229462	0.595529	-0.747755	0.630234	0.427292	0.999816	species_specific
5:141582311-141583615	0	0.614062	0	1.44551	0	0.622633	-1.36093	0.100563	-3.31383	0.627354	0.42835	0.999816	species_specific
3:69027899-69028295	0	0	1.05152	1.05128	1.30752	0.435843	-1.02553	0.132271	-2.91843	0.622628	0.430094	0.999816	species_specific
X:107840669-107854704	0.421429	0	0	0.262819	0.523007	0.933949	-1.55764	0.0903061	-3.46903	0.621586	0.430481	0.999816	MMU_CIRCpedia_9006
17:8506317-8509949	0.561905	0.736875	1.12162	1.05128	0.588383	0	0.904133	0.142657	-2.80938	0.620847	0.430755	0.999816	species_specific
1:62441487-62442299	0.491667	1.16672	1.05152	1.05128	0.392256	0.560369	0.769255	0.157712	-2.66463	0.619858	0.431122	0.999816	species_specific
3:3137259-3144710	0.280952	0	0.350507	0.722753	0.392256	0.996212	-1.3015	0.104486	-3.25862	0.615903	0.432596	0.999816	species_specific
2:187496880-187503770	0.632143	0.552656	1.47213	1.83973	0.849887	2.11695	-0.491318	0.220787	-2.17927	0.61523	0.432847	0.999816	species_specific
14:102968252-102970261	0	0.429844	1.40203	1.05128	1.17677	1.49432	-0.666854	0.173945	-2.52329	0.608383	0.435419	0.999816	species_specific
11:128758114-128772985	1.33452	2.82469	1.40203	2.82531	2.35353	3.48674	-0.29613	0.384292	-1.37972	0.605097	0.436662	0.999816	species_specific
X:119930015-119932216	0	0.429844	0	0.657048	0.32688	0.684896	-1.56336	0.0878043	-3.50956	0.60497	0.43671	0.999816	MMU_CIRCpedia_18462
5:126603569-126604183	0	0.245625	0	0.394229	0.32688	0.498106	-1.84338	0.073144	-3.77312	0.604705	0.43681	0.999816	MMU_CIRCpedia_222881
10:11509594-11527567	0.913095	0.675469	0	0.919867	1.37289	1.12074	-0.749332	0.160205	-2.64201	0.602952	0.437476	0.999816	MMU_CIRCpedia_25709
11:59658865-59659469	0	0	0.49071	0	1.04601	0.747159	-1.45827	0.094401	-3.40505	0.598873	0.43903	0.999816	species_specific
10:92974052-92997615	0	0.368437	0.560811	1.18269	0.523007	0.871686	-1.08648	0.122092	-3.03396	0.59681	0.439819	0.999816	species_specific
3:50113382-50114251	0	0.49125	0	0.394229	0.915263	0.435843	-1.48056	0.0918343	-3.44482	0.596299	0.440015	0.999816	species_specific
18:62348167-62349937	0.632143	0.49125	0.420608	1.44551	1.24214	0.684896	-0.759468	0.157858	-2.6633	0.590303	0.442324	0.999816	species_specific
4:1900625-1918623	0.632143	0.307031	0.280406	0	0.457631	0	1.62426	0.0833672	-3.58438	0.589668	0.442569	0.999816	MMU_CIRCpedia_17009
9:33953284-33996333	0.983333	1.78078	0	1.24839	1.24214	2.366	-0.472992	0.222301	-2.16942	0.589535	0.44262	0.999816	species_specific
5:14330777-14336727	0.35119	0	0.49071	0.919867	0.588383	0.933949	-1.11903	0.117943	-3.08384	0.586748	0.443701	0.999816	MMU_CIRCpedia_15077
3:31576395-31580096	0	0.49125	0.49071	0	0	0.311316	1.79932	0.0723121	-3.78962	0.582146	0.445494	0.999816	MMU_CIRCpedia_3807
1:208142328-208218002	0	0.675469	0	0.459934	0.719135	0.871686	-1.26669	0.103174	-3.27685	0.581335	0.445811	0.999816	MMU_CIRCpedia_12732
5:172055587-172057473	0.35119	0.921094	0	2.10255	0.457631	0.498106	-0.893797	0.140507	-2.83129	0.576079	0.447874	0.999816	species_specific
22:41808874-41810291	0	0.49125	0	0.854162	0.523007	0.37358	-1.45853	0.0912408	-3.45418	0.572959	0.449107	0.999816	species_specific
6:7176654-7189322	0	0.552656	0.49071	1.44551	0.653759	0.622633	-1.01101	0.128012	-2.96565	0.572033	0.449474	0.999816	MMU_CIRCpedia_18690
19:48149762-48150210	1.54524	0	0	1.97114	0.523007	0.933949	-0.735857	0.159806	-2.6456	0.57023	0.450189	0.999816	species_specific
11:13413529-13445181	0.421429	0.675469	0.350507	0	1.96128	1.183	-0.795801	0.15123	-2.72518	0.567934	0.451102	0.999816	MMU_CIRCpedia_3528
10:68787926-68788328	1.12381	2.21062	1.68243	1.44551	1.43827	2.05469	0.357172	0.287632	-1.7977	0.566072	0.451845	0.999816	MMU_CIRCpedia_25368
19:48231659-48241063	0	0.245625	0	0.394229	0.523007	0.249053	-1.79584	0.0721039	-3.79378	0.564467	0.452487	0.999816	species_specific
2:214767481-214781509	0.632143	0.798281	0.350507	0.525638	0.457631	0	1.15241	0.109733	-3.18793	0.563703	0.452793	0.999816	MMU_CIRCpedia_27704
3:52737585-52741499	0.632143	1.78078	0.841217	2.23396	1.76515	1.49432	-0.409473	0.250195	-1.99888	0.562587	0.453241	0.999816	species_specific
6:13579450-13584225	0.491667	0	0.420608	0	0	0.311316	1.78734	0.0714838	-3.80624	0.561783	0.453563	0.999816	species_specific
4:139529030-139533366	0	0.245625	0	0.788458	0.392256	0	-1.79008	0.072008	-3.7957	0.560161	0.454216	0.999816	species_specific
17:35362738-35363826	0.421429	0.307031	0	0.854162	0.457631	0.871686	-1.18104	0.108138	-3.20906	0.558552	0.454865	0.999816	species_specific
22:31462931-31463133	0	0.429844	0	0.788458	0.392256	0.435843	-1.51979	0.0865817	-3.52979	0.557579	0.455258	0.999816	MMU_CIRCpedia_16435
12:112075677-112078741	0	1.65797	1.54223	2.03685	2.35353	0.996212	-0.413102	0.247135	-2.01663	0.557353	0.45535	0.999816	species_specific
8:42906172-42943445	0.35119	0.614062	0.420608	1.90544	1.24214	0	-0.815709	0.147509	-2.76113	0.552124	0.457472	0.999816	species_specific
1:1804418-1825499	0	0.552656	0	0	0.980639	0.809422	-1.37267	0.0947768	-3.39932	0.549806	0.458417	0.999816	MMU_CIRCpedia_10611
5:6604137-6605408	0.632143	0.614062	0.560811	0	0.457631	0.560369	1.11335	0.112114	-3.15696	0.548261	0.45905	0.999816	species_specific
1:147252622-147259918	0.421429	0	0	0	1.04601	0.560369	-1.49063	0.088413	-3.4996	0.548101	0.459115	0.999816	species_specific
12:122316748-122319348	0.421429	0	0	0	1.04601	0.560369	-1.49063	0.088413	-3.4996	0.548101	0.459115	0.999816	species_specific
12:68816811-68828931	0	0.245625	0	0	0.392256	0.747159	-1.77205	0.0717022	-3.80184	0.546669	0.459703	0.999816	species_specific
5:93553760-93563463	0	0	0.420608	0.919867	0	0.747159	-1.49366	0.0879118	-3.5078	0.546241	0.459878	0.999816	species_specific
5:140438460-140449305	0	0	0.280406	0	0.653759	0.622633	-1.70251	0.0764545	-3.70926	0.543477	0.461016	0.999816	MMU_CIRCpedia_18139
10:118729294-118730410	0.702381	0.736875	0.841217	1.77403	0.784511	1.68111	-0.52933	0.196819	-2.34506	0.54091	0.462076	0.999816	MMU_CIRCpedia_24925
3:27411641-27452498	0.491667	0.614062	0	0	0.392256	0	1.63786	0.077928	-3.68172	0.53769	0.463412	0.999816	species_specific
18:46946056-46946923	0.772619	1.10531	0.560811	1.70832	0.784511	1.93016	-0.501475	0.20442	-2.29039	0.537611	0.463445	0.999816	species_specific
6:42592150-42594304	0.421429	0.429844	0	0	0.261504	0	1.78746	0.0680311	-3.87766	0.535916	0.46415	0.999816	species_specific
1:1223243-1223968	15.8738	16.4569	10.7255	17.149	16.0171	17.1224	0.120717	2.36303	1.24064	0.532554	0.465556	0.999816	MMU_CIRCpedia_39755
4:40890363-40893411	0.772619	1.41234	0.841217	1.24839	0.719135	0.560369	0.593552	0.178183	-2.48857	0.530411	0.466454	0.999816	MMU_CIRCpedia_26486
12:27714779-27724186	0.35119	0.675469	0.841217	1.97114	0.392256	1.36979	-0.623885	0.173156	-2.52986	0.53023	0.46653	0.999816	species_specific
14:32090501-32094386	0	0.307031	0.49071	0	0	0.249053	1.80035	0.0660919	-3.91938	0.529952	0.466647	0.999816	MMU_CIRCpedia_22395
3:55950424-55992250	0	0.675469	0.911318	0	0	0.809422	1.24163	0.100251	-3.3183	0.529777	0.466721	0.999816	MMU_CIRCpedia_15117
9:111574733-111586165	0	0	0.280406	1.05128	0.261504	0	-1.6834	0.0761102	-3.71577	0.529467	0.466851	0.999816	species_specific
16:49730770-49789546	0	0.307031	0	0.591343	0.457631	0.249053	-1.65734	0.0764539	-3.70927	0.525455	0.468544	0.999816	MMU_CIRCpedia_32940
17:8493732-8495241	0	0.245625	0	0.394229	0	0.747159	-1.73584	0.0711107	-3.81379	0.521049	0.470415	0.999816	species_specific
1:26268482-26269614	0.772619	0.798281	0.420608	0.525638	0.457631	0.249053	1.00556	0.121426	-3.04185	0.519748	0.470969	0.999816	MMU_CIRCpedia_39739
11:121045673-121060085	0	0.368437	0.911318	0	0	0.560369	1.45102	0.0866039	-3.52943	0.518843	0.471356	0.999816	MMU_CIRCpedia_19867
1:51836130-51840514	0	0.245625	0.350507	0	1.04601	0.809422	-1.27527	0.0982059	-3.34805	0.514476	0.473227	0.999816	species_specific
4:128074459-128091512	0.772619	1.35094	0.420608	0.525638	0.653759	0.684896	0.754574	0.150159	-2.73543	0.513053	0.47384	0.999816	species_specific
1:75739979-75750546	0.35119	1.10531	0	1.18269	0.784511	1.183	-0.770734	0.148288	-2.75353	0.508428	0.47584	0.999816	species_specific
12:45926141-45928859	0	0.736875	0.841217	0.459934	0	0.37358	1.21583	0.100057	-3.32111	0.506157	0.476827	0.999816	species_specific
9:33953284-33956146	1.19405	0.49125	0.841217	0	1.8959	0	0.720772	0.154688	-2.69257	0.505028	0.477319	0.999816	species_specific
2:241403827-241418109	0	0.368437	0	0.394229	0.457631	0.560369	-1.54926	0.0807656	-3.63012	0.504627	0.477494	0.999816	MMU_CIRCpedia_229163
1:31337174-31339048	0.421429	0.245625	0.560811	0	0.523007	0	1.46153	0.085204	-3.55294	0.504522	0.47754	0.999816	species_specific
12:94578393-94582538	0	0.245625	0	0	0.523007	0.560369	-1.71386	0.0705353	-3.82551	0.504314	0.47763	0.999816	MMU_CIRCpedia_39025
4:143543508-143543972	21.0714	22.9659	21.9417	27.2675	19.8743	31.1316	0.104858	3.62665	1.85864	0.503113	0.478155	0.999816	species_specific
1:117402185-117405645	7.02381	10.2548	6.16892	7.95028	6.21071	12.7017	0.144595	1.28483	0.361581	0.502941	0.47823	0.999816	MMU_CIRCpedia_221983
8:51831443-51861246	0	0.49125	0.420608	0	0	0.311316	1.69201	0.0703661	-3.82897	0.502249	0.478533	0.999816	species_specific
7:73686635-73687095	0	0.736875	0	0.525638	0.719135	0.809422	-1.15132	0.104766	-3.25475	0.502203	0.478553	0.999816	MMU_CIRCpedia_8207
16:53873785-53888951	0	0.368437	0	0.262819	1.11139	0	-1.54864	0.0805752	-3.63352	0.501325	0.478938	0.999816	MMU_CIRCpedia_34086
1:114463103-114464388	0.632143	1.71937	0.841217	0.657048	0.588383	1.49432	0.538172	0.187011	-2.41881	0.500819	0.47916	0.999816	MMU_CIRCpedia_935
6:158583953-158589782	0	0	0.280406	0.591343	0.653759	0	-1.64721	0.0752669	-3.73184	0.500648	0.479235	0.999816	species_specific
2:171690146-171692894	0.421429	0.368437	0	0.591343	0.784511	0.809422	-1.09101	0.110271	-3.18088	0.500496	0.479302	0.999816	species_specific
1:20757165-20773610	0	0.614062	0.560811	0	1.24214	1.49432	-0.891524	0.133573	-2.9043	0.495175	0.481647	0.999816	species_specific
1:117402185-117466427	1.19405	0.368437	0	0.657048	1.24214	1.36979	-0.699391	0.157273	-2.66866	0.495156	0.481656	0.999816	MMU_CIRCpedia_222
2:135675331-135680324	0	0	0.420608	1.05128	0	0.560369	-1.44073	0.0865536	-3.53026	0.494792	0.481817	0.999816	species_specific
2:108771700-108773046	0.491667	0.736875	0.420608	0.525638	1.43827	1.36979	-0.676363	0.160112	-2.64285	0.493295	0.48248	0.999816	species_specific
9:95978060-96004701	1.12381	0.798281	0.350507	1.97114	1.50365	0.684896	-0.510139	0.195521	-2.3546	0.493083	0.482574	0.999816	species_specific
1:92563641-92607727	0.35119	0	0	0	0.719135	0.684896	-1.52912	0.0815298	-3.61653	0.489983	0.483954	0.999816	MMU_CIRCpedia_2169
22:41268096-41281082	0.772619	0.429844	0.280406	0	0.32688	0.435843	1.24017	0.0974844	-3.35868	0.48937	0.484228	0.999816	species_specific
4:56011411-56011985	0.491667	0	0.280406	0	0.261504	0	1.73125	0.066609	-3.90814	0.488869	0.484452	0.999816	species_specific
18:21532472-21532660	0	0.49125	0.280406	0	0	0.249053	1.71706	0.0650551	-3.94219	0.488041	0.484822	0.999816	species_specific
9:20715321-20740340	0.561905	0.307031	0	0	0	0.311316	1.67152	0.0697383	-3.84191	0.485071	0.486154	0.999816	MMU_CIRCpedia_33010
10:32021021-32021287	0	0	0.49071	0.985572	0.719135	0	-1.34834	0.0913202	-3.45292	0.484421	0.486446	0.999816	species_specific
17:80289658-80290728	0	0	0.841217	1.11698	0.32688	0.871686	-1.03935	0.114486	-3.12676	0.483822	0.486715	0.999816	species_specific
4:51863436-51877854	0.35119	0.859687	0	0	0	0.498106	1.47316	0.0823884	-3.60141	0.483394	0.486908	0.999816	MMU_CIRCpedia_28454
14:96833466-96860735	1.05357	0.614062	1.33193	1.11698	1.56902	2.366	-0.402405	0.237494	-2.07404	0.48284	0.487158	0.999816	MMU_CIRCpedia_1666
19:39453355-39453521	1.89643	1.22812	3.43497	2.56249	2.02665	2.366	0.267184	0.380737	-1.39314	0.481696	0.487674	0.999816	species_specific
9:33986759-33989126	1.19405	1.22812	0	0.788458	0	0.996212	0.774401	0.144551	-2.79035	0.480654	0.488145	0.999816	MMU_CIRCpedia_19567
1:231800107-231818517	0	0	0.280406	0.591343	0.392256	0.249053	-1.61832	0.0747624	-3.74154	0.480466	0.48823	0.999816	species_specific
3:138570317-138572984	0.632143	0	0	0.722753	0.849887	0.37358	-1.18727	0.101372	-3.30227	0.48023	0.488337	0.999816	species_specific
3:138570317-138571356	0.702381	0.245625	0.911318	1.70832	0.588383	1.36979	-0.595328	0.173238	-2.52917	0.479916	0.488479	0.999816	MMU_CIRCpedia_36112
2:54982514-54987698	0	0.429844	0	1.05128	0	0.498106	-1.43825	0.0845131	-3.56468	0.478184	0.489265	0.999816	MMU_CIRCpedia_15571
3:172295362-172310881	0	0.552656	0	0.722753	0.523007	0.498106	-1.30336	0.0927545	-3.43044	0.47796	0.489367	0.999816	MMU_CIRCpedia_14968
8:140397619-140405698	1.05357	0.307031	0	0	0	0.684896	1.29934	0.0923435	-3.43685	0.475975	0.49027	0.999816	species_specific
6:136151159-136155758	1.19405	0.307031	0.49071	0.657048	1.24214	1.8679	-0.557786	0.180853	-2.46711	0.475435	0.490517	0.999816	species_specific
7:77749423-77765632	0	0	0.841217	0	0	0.311316	1.66193	0.0692896	-3.85122	0.474903	0.490759	0.999816	MMU_CIRCpedia_13091
6:144451369-144459354	0.772619	0.921094	0.630913	1.44551	1.24214	1.49432	-0.494227	0.197041	-2.34343	0.474336	0.491018	0.999816	MMU_CIRCpedia_223018
1:26446315-26447660	0.421429	1.28953	0.701014	2.10255	1.50365	0.684896	-0.482132	0.200509	-2.31826	0.47419	0.491085	0.999816	species_specific
12:19462509-19500221	0.491667	0.49125	0	0	0	0.37358	1.58911	0.0739765	-3.75679	0.473737	0.491292	0.999816	species_specific
17:82563353-82568201	1.89643	1.78078	2.52365	2.6939	2.09203	1.74337	0.275521	0.359008	-1.47791	0.472982	0.491637	0.999816	species_specific
7:129014978-129018157	0	0	0.420608	0	1.24214	0.249053	-1.418	0.0857582	-3.54358	0.469695	0.493146	0.999816	MMU_CIRCpedia_15510
11:108176245-108177090	1.19405	0.798281	0.630913	0.854162	0.523007	0.747159	0.651159	0.159631	-2.64719	0.460018	0.497634	0.999816	species_specific
14:103003927-103012188	0.561905	0.552656	1.05152	2.10255	0.849887	1.05848	-0.516112	0.188742	-2.40552	0.459918	0.497681	0.999816	species_specific
7:134947507-134950514	1.33452	1.41234	0.49071	0.919867	0	1.99242	0.495732	0.192577	-2.37649	0.458527	0.498332	0.999816	species_specific
16:4332214-4333519	0	0.921094	0	0.328524	0	0	1.61245	0.0699736	-3.83704	0.458493	0.498348	0.999816	species_specific
13:46020448-46045513	0.772619	0.552656	0	0	0.32688	0.311316	1.30177	0.0899176	-3.47525	0.453295	0.500793	0.999816	species_specific
21:41226265-41257326	1.33452	0.614062	1.75253	0.788458	1.37289	1.36979	0.41212	0.223828	-2.15954	0.4511	0.501831	0.999816	species_specific
4:144658789-144659838	0.35119	0.675469	0	0.591343	0	1.93016	-0.929295	0.12289	-3.02456	0.450595	0.502071	0.999816	species_specific
7:139402136-139405787	0.280952	1.16672	0	0	0.261504	0.435843	1.24709	0.0930767	-3.42544	0.45022	0.502249	0.999816	species_specific
1:41070594-41075451	2.24762	1.53516	3.08446	2.49678	1.56902	3.29995	0.249988	0.397433	-1.33122	0.449644	0.502523	0.999816	MMU_CIRCpedia_5143
11:2969802-2972243	0	0.675469	0.560811	1.11698	1.17677	0.498106	-0.829547	0.135482	-2.88382	0.446968	0.503797	0.999816	MMU_CIRCpedia_9360
16:88608933-88611536	0	0.552656	0	1.05128	0	0.684896	-1.26911	0.0918482	-3.4446	0.446102	0.50421	0.999816	MMU_CIRCpedia_211770
1:247159005-247159813	0.842857	0.429844	0.630913	0.525638	0	0.747159	0.934548	0.120347	-3.05473	0.442591	0.505893	0.999816	species_specific
9:111578795-111586165	0	0.429844	0.630913	1.11698	0.523007	0.933949	-0.903919	0.125605	-2.99303	0.441368	0.506481	0.999816	species_specific
9:33971650-33989126	0.280952	0.675469	0.841217	0.985572	1.96128	0.498106	-0.600198	0.167118	-2.58106	0.441271	0.506528	0.999816	species_specific
19:11178344-11178720	0.561905	1.84219	1.40203	1.44551	1.24214	0.933949	0.403482	0.224056	-2.15807	0.440913	0.5067	0.999816	species_specific
14:75109684-75110371	0.280952	0.368437	0.280406	0.394229	0.457631	1.49432	-0.961274	0.117576	-3.08834	0.440438	0.506929	0.999816	MMU_CIRCpedia_223325
9:33960825-33989126	0.983333	2.76328	2.52365	1.97114	2.61504	1.99242	0.264153	0.35945	-1.47614	0.43954	0.507363	0.999816	species_specific
11:581491-582081	0.280952	0.429844	0	0.854162	0.392256	0.747159	-1.1024	0.102951	-3.27997	0.439057	0.507596	0.999816	MMU_CIRCpedia_9044
17:30481142-30484770	0.702381	0.859687	0.630913	2.29967	0	1.74337	-0.503571	0.188308	-2.40883	0.438811	0.507715	0.999816	species_specific
4:2490336-2497121	0	0	0.420608	0.854162	0.653759	0	-1.38072	0.0849374	-3.55746	0.438332	0.507947	0.999816	species_specific
15:57451499-57453818	0	1.04391	0.560811	1.18269	1.04601	0.996212	-0.670135	0.154411	-2.69515	0.436986	0.508599	0.999816	MMU_CIRCpedia_27886
2:241704652-241712071	1.12381	0.921094	0	0	0.849887	0.498106	0.884769	0.126228	-2.9859	0.434835	0.509644	0.999816	species_specific
1:51772069-51772723	0	0.368437	0.280406	0.919867	0.588383	0.37358	-1.15516	0.0988519	-3.33859	0.434605	0.509756	0.999816	species_specific
16:3736035-3745354	0.421429	0.368437	0.841217	0	0.653759	0.311316	1.04461	0.106605	-3.22966	0.434301	0.509904	0.999816	MMU_CIRCpedia_19499
14:24210347-24211829	0	0.552656	0	0.591343	0.588383	0.498106	-1.25746	0.0914285	-3.45121	0.433718	0.510188	0.999816	species_specific
5:94888878-94912976	0.280952	1.22812	0.771115	0.459934	0.653759	0.498106	0.79446	0.137101	-2.86669	0.432367	0.510848	0.999816	MMU_CIRCpedia_29421
8:130079901-130092143	0.491667	0	0.350507	0	0.32688	0	1.57515	0.0701518	-3.83338	0.431176	0.51143	0.999816	species_specific
3:47097954-47103423	0.561905	0.675469	0	1.11698	0.32688	1.36979	-0.81374	0.135397	-2.88473	0.430535	0.511745	0.999816	species_specific
9:86033281-86040868	0	0.614062	0.280406	0.985572	1.24214	0	-0.978598	0.113517	-3.13903	0.429992	0.512011	0.999816	species_specific
16:3850296-3851009	0.702381	2.51766	1.54223	1.3141	0.980639	2.49053	0.323081	0.275215	-1.86137	0.429441	0.512281	0.999816	MMU_CIRCpedia_19721
10:68747160-68747566	0	0.245625	0	1.05128	0	0	-1.59663	0.0685368	-3.86698	0.429328	0.512337	0.999816	MMU_CIRCpedia_25388
18:76849525-76871825	0	0.245625	0	1.05128	0	0	-1.59663	0.0685368	-3.86698	0.429328	0.512337	0.999816	MMU_CIRCpedia_31094
5:177209635-177212195	0.35119	0.614062	0	0.394229	0	0	1.51764	0.0733515	-3.76903	0.429108	0.512445	0.999816	MMU_CIRCpedia_23113
16:22313619-22315208	0	0.49125	0.350507	0	0	0.311316	1.57602	0.0684248	-3.86934	0.426656	0.513652	0.999816	species_specific
2:9279316-9297445	0.491667	0	0	1.3141	0	0.37358	-1.2734	0.0902631	-3.46972	0.424876	0.514532	0.999816	species_specific
8:140700890-140702707	0.983333	1.41234	0	1.77403	1.30752	1.12074	-0.462824	0.198018	-2.3363	0.424677	0.51463	0.999816	MMU_CIRCpedia_218557
9:37126311-37126942	0.561905	1.47375	0	1.3141	1.04601	1.36979	-0.537326	0.176884	-2.49913	0.423695	0.515117	0.999816	MMU_CIRCpedia_20388
12:96621589-96644408	0	0.245625	0	0.657048	0	0.37358	-1.58627	0.0683854	-3.87017	0.423183	0.515371	0.999816	species_specific
10:126970701-127061776	0	0.307031	0	0	0.523007	0.622633	-1.5166	0.0735225	-3.76567	0.421768	0.516074	0.999816	species_specific
5:38990948-39021136	0	0.798281	0	1.05128	0.457631	0.560369	-1.03446	0.106017	-3.23763	0.420236	0.516837	0.999816	MMU_CIRCpedia_26759
12:69589484-69593613	0.280952	0	0	0	0.523007	0.622633	-1.52619	0.0734924	-3.76626	0.419692	0.517108	0.999816	species_specific
9:34269256-34271930	0.983333	0.307031	0.420608	0	0.523007	0.560369	0.974744	0.111862	-3.16021	0.419474	0.517217	0.999816	species_specific
6:163455278-163478896	1.19405	1.78078	0.350507	0.394229	1.24214	1.36979	0.457063	0.197813	-2.33779	0.418333	0.517788	0.999816	MMU_CIRCpedia_759
6:129629352-129634105	0.280952	0	0.420608	0	0.261504	0	1.5931	0.0645524	-3.95339	0.417415	0.518247	0.999816	species_specific
15:89113724-89116521	0.702381	0.49125	0	0.591343	0	0	1.32913	0.0844805	-3.56524	0.415834	0.519041	0.999816	MMU_CIRCpedia_30102
11:70354300-70356254	0.280952	0	0	0	1.11139	0	-1.52072	0.0732001	-3.77201	0.413596	0.520167	0.999816	species_specific
3:169976945-169988359	0.913095	1.10531	1.12162	1.83973	0.653759	2.67732	-0.362167	0.240985	-2.05298	0.407241	0.523391	0.999816	species_specific
20:36804734-36805957	0	0.245625	0.420608	0	0	0.249053	1.55802	0.0625545	-3.99874	0.406941	0.523543	0.999816	species_specific
3:172251259-172310881	0.702381	1.47375	1.54223	2.03685	2.35353	1.49432	-0.319046	0.274076	-1.86735	0.406508	0.523765	0.999816	species_specific
1:10433841-10442441	0	0	0.350507	0.722753	0.588383	0	-1.42429	0.0785539	-3.67017	0.404988	0.524542	0.999816	species_specific
17:67945408-67948306	1.12381	0.49125	0	0.657048	0	0.37358	1.00325	0.106536	-3.23058	0.402725	0.525702	0.999816	species_specific
4:39737419-39774933	0.632143	0.614062	1.19172	0.459934	0.849887	0.622633	0.665587	0.150874	-2.72859	0.402326	0.525908	0.999816	species_specific
14:80831142-80840768	0	0	0.350507	0.788458	0.523007	0	-1.41885	0.0784526	-3.67204	0.401323	0.526424	0.999816	MMU_CIRCpedia_34035
7:39987598-39988258	0	0.675469	0	0	1.76515	0	-1.11593	0.0980878	-3.34978	0.401037	0.526571	0.999816	MMU_CIRCpedia_12129
14:54702061-54702580	0.842857	0.675469	0.280406	0	0.719135	0.435843	0.92426	0.11521	-3.11767	0.400166	0.527021	0.999816	MMU_CIRCpedia_21017
7:77581426-77592256	0	0	0.280406	0.591343	0	0.560369	-1.49912	0.0725896	-3.78409	0.40015	0.527029	0.999816	species_specific
9:100441905-100442356	0.702381	0.9825	1.05152	0.985572	0.915263	0.435843	0.563107	0.167207	-2.5803	0.396305	0.529021	0.999816	species_specific
7:111935539-111945798	0	1.16672	1.54223	1.11698	2.02665	1.36979	-0.403713	0.215404	-2.21488	0.396054	0.529151	0.999816	MMU_CIRCpedia_19409
1:61899582-61901459	0	0.49125	0	0	0.980639	0.498106	-1.27701	0.08618	-3.5365	0.39602	0.529169	0.999816	species_specific
11:18291441-18292976	0.35119	0	0.420608	0.919867	0.588383	0.560369	-0.998236	0.107529	-3.2172	0.395345	0.52952	0.999816	species_specific
12:32598496-32611283	0	0.307031	0	0.722753	0	0.435843	-1.47349	0.0728061	-3.7798	0.394453	0.529985	0.999816	MMU_CIRCpedia_11470
7:152309965-152315338	1.33452	1.59656	1.33193	1.51121	2.81116	2.24148	-0.284686	0.305751	-1.70957	0.394368	0.530029	0.999816	MMU_CIRCpedia_14509
9:27168494-27173362	0	0	0.420608	1.11698	0	0.37358	-1.32512	0.083754	-3.5777	0.39436	0.530034	0.999816	species_specific
4:1225359-1241519	0.702381	0.552656	0.841217	0.985572	0	0.560369	0.804404	0.131289	-2.92918	0.394012	0.530215	0.999816	MMU_CIRCpedia_16818
19:8468773-8474244	0.421429	0.552656	0.701014	0.328524	0	0.747159	0.964774	0.109035	-3.19713	0.393861	0.530294	0.999816	species_specific
5:34686871-34757598	4.28452	4.42125	3.36487	6.17625	4.96857	6.03954	-0.161414	0.758762	-0.39828	0.391452	0.531554	0.999816	MMU_CIRCpedia_1744
9:77381975-77407607	0	1.47375	0.350507	0.722753	1.11139	1.55658	-0.578004	0.163544	-2.61225	0.391273	0.531648	0.999816	species_specific
19:50398850-50399484	0.632143	0.49125	0.350507	0.919867	1.11139	0.996212	-0.677843	0.148377	-2.75267	0.390405	0.532103	0.999816	species_specific
15:90439331-90443478	0	0.368437	0.771115	0.657048	1.11139	0.809422	-0.822789	0.129019	-2.95434	0.387872	0.533437	0.999816	species_specific
8:38836161-38840267	0.35119	0	0	0.525638	0.523007	0.249053	-1.39161	0.0785164	-3.67086	0.386751	0.534029	0.999816	species_specific
14:65615977-65629606	0	0.614062	0.630913	0	0	0.622633	1.24479	0.0865373	-3.53053	0.386603	0.534107	0.999816	MMU_CIRCpedia_29646
1:28580559-28581229	0.280952	0.675469	0	0.525638	1.04601	0.684896	-0.904671	0.116041	-3.1073	0.384455	0.535245	0.999816	species_specific
8:91986123-92076137	0.702381	0.368437	0.420608	0	0.32688	0.560369	1.05019	0.100685	-3.31208	0.384079	0.535445	0.999816	species_specific
19:21033455-21034184	1.54524	0.736875	1.26183	1.18269	1.50365	0.747159	0.394381	0.216717	-2.20611	0.383665	0.535665	0.999816	species_specific
8:140879470-140890769	0.35119	0	0.280406	1.24839	0	0.622633	-1.09623	0.0983084	-3.34654	0.38339	0.535811	0.999816	MMU_CIRCpedia_28397
3:125313307-125313656	0	0.368437	0	0.854162	0	0.435843	-1.38891	0.077245	-3.69442	0.382642	0.536209	0.999816	species_specific
17:59764970-59773885	0	0.245625	0	0	0.261504	0.684896	-1.51919	0.0672084	-3.89521	0.381862	0.536625	0.999816	species_specific
20:16526091-16528440	0.561905	0.675469	0	1.18269	0.915263	0.622633	-0.777247	0.133872	-2.90108	0.38115	0.537005	0.999816	species_specific
5:138810037-138827718	0	0.736875	0	0	0.261504	0	1.5012	0.0641758	-3.96183	0.379181	0.538059	0.999816	MMU_CIRCpedia_17648
3:141553856-141559995	0	0.736875	0	0.591343	0.261504	1.05848	-1.03945	0.101073	-3.30653	0.378766	0.538281	0.999816	MMU_CIRCpedia_35392
10:110593072-110598290	0.561905	0.368437	0	0	0.392256	0	1.42498	0.0735342	-3.76544	0.378468	0.538441	0.999816	species_specific
2:56192476-56193440	0.561905	0.368437	0	0	0.392256	0	1.42498	0.0735342	-3.76544	0.378468	0.538441	0.999816	species_specific
17:60623520-60648082	0	0	0.420608	0.394229	0.588383	0.435843	-1.30604	0.0832063	-3.58716	0.377802	0.538799	0.999816	species_specific
17:19909180-19909978	0.772619	0	0.771115	0.262819	0.719135	0	0.988143	0.105413	-3.24588	0.377522	0.538949	0.999816	species_specific
16:53255599-53274302	0.421429	0.9825	0.560811	0	0.523007	0.809422	0.84011	0.122768	-3.026	0.37446	0.5406	0.999816	species_specific
7:8218304-8236005	0.983333	1.71937	0.630913	1.90544	0.653759	2.80185	-0.333948	0.24885	-2.00665	0.372231	0.541807	0.999816	MMU_CIRCpedia_32811
15:63712774-63716473	0	0.245625	0	0.525638	0	0.435843	-1.49772	0.0669195	-3.90143	0.370042	0.542998	0.999816	species_specific
3:100732507-100736716	0.842857	0	0	0.394229	0	0	1.44168	0.0712875	-3.81021	0.369742	0.543161	0.999816	species_specific
17:47664158-47668410	0.421429	0	0.630913	0.262819	0.261504	0	1.31825	0.0803477	-3.6376	0.369719	0.543174	0.999816	species_specific
6:36524340-36540207	0.842857	1.65797	2.24324	1.51121	1.56902	1.80563	0.296222	0.28032	-1.83485	0.369397	0.54335	0.999816	species_specific
6:144537581-144539443	0	1.10531	1.26183	3.02242	1.11139	0	-0.439767	0.194927	-2.35899	0.36406	0.546333	0.999816	species_specific
4:2952274-2956811	0.702381	0.307031	0.98142	0	1.04601	0.37358	0.799811	0.127891	-2.96701	0.363894	0.546368	0.999816	species_specific
4:56478378-56483270	0	0.614062	0	0.459934	0.653759	0.560369	-1.12195	0.093073	-3.42549	0.36071	0.548129	0.999816	species_specific
8:140864311-140890769	0.35119	0.368437	0	0.788458	0.784511	0.311316	-1.01246	0.10133	-3.30286	0.357308	0.550021	0.999816	MMU_CIRCpedia_28394
5:179709872-179716294	0.632143	0	0	0	0.261504	0	1.46541	0.0627553	-3.99412	0.356986	0.550201	0.999816	species_specific
9:16727796-16738485	2.17738	2.70187	3.36487	3.15383	2.74579	3.23769	0.196739	0.473657	-1.07809	0.354705	0.551478	0.999816	MMU_CIRCpedia_31711
1:20980333-21002808	0	0.921094	0.280406	0	0.32688	0.249053	1.23068	0.0839139	-3.57495	0.354702	0.551479	0.999816	MMU_CIRCpedia_8598
20:35721739-35732135	0.772619	0.921094	0.630913	0	0.32688	1.49432	0.666393	0.144152	-2.79433	0.352788	0.552555	0.999816	MMU_CIRCpedia_215959
2:101281858-101295181	0	0.614062	0	0.722753	0.457631	0.498106	-1.11101	0.0927888	-3.42991	0.351965	0.553019	0.999816	MMU_CIRCpedia_19194
11:119131534-119133219	0.421429	0	0	0	0.392256	0.996212	-1.25723	0.0828677	-3.59305	0.34804	0.555241	0.999816	species_specific
13:30283615-30283791	1.05357	0.921094	0	0.394229	0.457631	0.560369	0.795209	0.124954	-3.00053	0.346851	0.555917	0.999816	species_specific
10:13666096-13670528	0	0	0.420608	1.05128	0	0.37358	-1.26182	0.0823129	-3.60274	0.346354	0.5562	0.999816	species_specific
22:24365475-24369320	0	0	0.420608	1.05128	0	0.37358	-1.26182	0.0823129	-3.60274	0.346354	0.5562	0.999816	MMU_CIRCpedia_29031
16:69695135-69695379	0.632143	0	0	0.985572	0.261504	0.560369	-1.05244	0.0974618	-3.35902	0.346314	0.556223	0.999816	species_specific
20:58438944-58441083	2.52857	4.66687	4.27619	4.40222	4.18406	7.59612	-0.155445	0.71746	-0.47903	0.346178	0.556301	0.999816	species_specific
1:23071224-23072197	0	0.429844	0	0	0.32688	0.996212	-1.27318	0.0805161	-3.63458	0.34564	0.556607	0.999816	species_specific
17:67945408-67975958	1.75595	1.53516	0.98142	1.51121	1.96128	3.0509	-0.266962	0.304542	-1.71528	0.34545	0.556716	0.999816	species_specific
1:150223185-150229237	0.421429	0.368437	0	0	0.32688	0	1.41672	0.0679984	-3.87836	0.342561	0.558371	0.999816	species_specific
22:50684584-50722437	0.561905	0	0	0	0	0.249053	1.40338	0.060282	-4.05213	0.339662	0.56004	0.999816	NA
10:100923974-100926019	1.82619	1.965	0.841217	3.87658	1.8959	1.30753	-0.251914	0.324169	-1.62518	0.339582	0.560086	0.999816	MMU_CIRCpedia_20443
22:38494629-38501280	0	0	0.280406	0.591343	0.457631	0	-1.39765	0.0706194	-3.82379	0.337936	0.561039	0.999816	species_specific
6:130926604-130956499	0.983333	0	0.701014	0.788458	0	0.435843	0.858925	0.113944	-3.1336	0.337928	0.561043	0.999816	MMU_CIRCpedia_219405
20:47262287-47276795	0.421429	0.368437	0.420608	1.3141	1.30752	0	-0.746393	0.131923	-2.92223	0.336389	0.561937	0.999816	species_specific
22:21805849-21807846	0.421429	0.429844	0	0.394229	0.653759	0.996212	-0.90037	0.108687	-3.20175	0.335193	0.562632	0.999816	MMU_CIRCpedia_11792
1:41113282-41143112	0.280952	0	0.280406	0	0	0.249053	1.38974	0.0601578	-4.0551	0.334446	0.563068	0.999816	MMU_CIRCpedia_5130
2:99462495-99464985	0	0.49125	0.350507	0.459934	0.980639	0.560369	-0.911107	0.10737	-3.21933	0.334301	0.563153	0.999816	MMU_CIRCpedia_18792
6:104833041-104843298	0.491667	0.614062	0.49071	2.49678	0	0.684896	-0.598036	0.152542	-2.71272	0.334284	0.563163	0.999816	MMU_CIRCpedia_36565
14:20395449-20396730	0	0	0.701014	0	0	0.311316	1.41271	0.065377	-3.93507	0.331188	0.564976	0.999816	species_specific
2:11765532-11767858	0	0.245625	0	0	0.849887	0	-1.42263	0.0654688	-3.93305	0.330952	0.565114	0.999816	species_specific
18:24366891-24377535	0	0	0.560811	0	0	0.249053	1.37602	0.0600338	-4.05808	0.329218	0.566135	0.999816	MMU_CIRCpedia_7343
2:241342991-241343897	0.280952	0	0	0.591343	0.457631	0	-1.37609	0.0707494	-3.82114	0.328137	0.566773	0.999816	species_specific
8:47957170-47957431	0.632143	0	0	0.328524	0.784511	0.622633	-1.03175	0.0968363	-3.36831	0.327488	0.567157	0.999816	species_specific
12:56169528-56170208	0.842857	2.45625	3.08446	2.10255	1.76515	3.0509	0.223068	0.370083	-1.43408	0.326819	0.567553	0.999816	species_specific
1:230954332-230961303	0	0.245625	0	0.591343	0	0.311316	-1.40825	0.0655276	-3.93175	0.325986	0.568047	0.999816	MMU_CIRCpedia_6373
21:43686803-43688240	0.772619	0.921094	0.701014	0.854162	1.43827	1.74337	-0.410683	0.19643	-2.34791	0.325889	0.568105	0.999816	species_specific
1:161102047-161102375	0.421429	0.614062	0.98142	0.985572	0	0.560369	0.74275	0.128736	-2.95752	0.322355	0.570211	0.999816	species_specific
8:18799294-18804898	0.280952	0.307031	0	0	0.784511	0.809422	-1.07792	0.0918082	-3.44523	0.321555	0.57069	0.999816	MMU_CIRCpedia_26900
7:23611170-23611553	0	0	0.701014	0.328524	0	0	1.39058	0.0655047	-3.93226	0.320759	0.571167	0.999816	species_specific
1:66946149-66963160	0.280952	0	0.560811	0	0.392256	0	1.33663	0.0716286	-3.80332	0.320652	0.571231	0.999816	species_specific
1:20904882-20942330	0.491667	0.429844	0.49071	0.459934	0	0.435843	0.992853	0.0977344	-3.35499	0.320244	0.571476	0.999816	species_specific
8:92075964-92081293	0.772619	1.41234	1.26183	0.854162	1.30752	1.183	0.371485	0.209481	-2.25511	0.317581	0.57308	0.999816	species_specific
7:111977131-111984390	0.561905	0.429844	0.560811	0.919867	0.980639	1.12074	-0.597166	0.150459	-2.73255	0.317415	0.573181	0.999816	species_specific
4:40934455-40945070	0.561905	0.675469	0	1.11698	1.17677	0.311316	-0.723325	0.131597	-2.9258	0.316658	0.573638	0.999816	MMU_CIRCpedia_26505
20:21339043-21344208	0	0	0.280406	1.05128	0	0	-1.34983	0.0699264	-3.83802	0.313962	0.575274	0.999816	species_specific
1:32030297-32033334	0.772619	1.59656	1.96284	1.44551	1.83053	1.183	0.294272	0.25944	-1.94653	0.313866	0.575333	0.999816	MMU_CIRCpedia_7402
1:21861756-21862115	0.702381	1.04391	0.420608	0	0.719135	0.933949	0.682462	0.135928	-2.87908	0.312492	0.57617	0.999816	species_specific
20:61997549-61999108	0	0	0.49071	0.722753	0.261504	0.498106	-1.1372	0.0860578	-3.53855	0.311139	0.576997	0.999816	species_specific
12:68820324-68824651	0.983333	0	1.05152	1.24839	1.37289	0.996212	-0.456192	0.179216	-2.48023	0.309861	0.57778	0.999816	species_specific
5:113524980-113526785	0.491667	0	0.280406	0	0	0.37358	1.33488	0.0690055	-3.85715	0.309217	0.578176	0.999816	species_specific
14:60796216-60818847	0	0.614062	0.280406	0.591343	0.588383	0.871686	-0.856151	0.109208	-3.19485	0.308742	0.578468	0.999816	MMU_CIRCpedia_28312
1:81836884-81907230	0.280952	0.429844	0	0	0	0.311316	1.35429	0.0650264	-3.94283	0.308281	0.578752	0.999816	species_specific
6:32977570-32977738	0.35119	0	0	0.591343	0	0.622633	-1.26549	0.076107	-3.71583	0.308097	0.578865	0.999816	NA
10:30026102-30029866	0.632143	1.59656	1.19172	1.57692	0.719135	1.05848	0.368913	0.207117	-2.27148	0.306102	0.580097	0.999816	species_specific
21:39269898-39274472	0.491667	0.49125	0	0.788458	0.980639	0.435843	-0.807662	0.115909	-3.10894	0.305844	0.580257	0.999816	species_specific
17:29684562-29703062	0.983333	1.53516	1.05152	1.24839	1.04601	1.24527	0.349148	0.216534	-2.20734	0.304411	0.581145	0.999816	species_specific
21:46349011-46349820	0.983333	1.965	0.841217	1.3798	2.28816	2.11695	-0.275849	0.272889	-1.87362	0.30357	0.581668	0.999816	species_specific
12:32701414-32701562	0	0.614062	0	0	0.457631	1.12074	-1.04831	0.0910944	-3.45649	0.303393	0.581777	0.999816	species_specific
1:6806982-6825210	0.280952	0	0	0.722753	0	0.311316	-1.31931	0.0699281	-3.83798	0.300222	0.583758	0.999816	species_specific
1:202416786-202428929	0.35119	0	0.420608	0.394229	0	0	1.30671	0.0690951	-3.85527	0.296868	0.585867	0.999816	species_specific
17:45081643-45086652	1.12381	1.10531	0.420608	0.985572	1.76515	1.55658	-0.360765	0.209702	-2.25359	0.296648	0.586006	0.999816	MMU_CIRCpedia_833
6:129611532-129618852	0.280952	0	0.49071	0.394229	0	0	1.30414	0.0690625	-3.85595	0.295622	0.586655	0.999816	species_specific
1:114719578-114720717	0	0.307031	0.911318	0	0.392256	0.311316	1.05949	0.0886541	-3.49567	0.294582	0.587313	0.999816	MMU_CIRCpedia_846
12:5732519-5750970	0	0.368437	0	0.657048	0	0.498106	-1.2451	0.074349	-3.74954	0.294024	0.587668	0.999816	MMU_CIRCpedia_6573
1:24514313-24514567	0.280952	0	0.560811	0.459934	0.849887	0.684896	-0.847715	0.108398	-3.20559	0.292983	0.588329	0.999816	species_specific
16:11020192-11024921	0.491667	0	0.98142	0.394229	0.261504	0.37358	0.881347	0.103808	-3.26801	0.291804	0.589081	0.999816	MMU_CIRCpedia_1691
9:17235657-17236588	1.19405	0.552656	0	0.328524	0.392256	0.560369	0.778261	0.116497	-3.10164	0.291148	0.5895	0.999816	species_specific
3:183775914-183790980	0	0	0.771115	0.394229	0	0	1.29379	0.0689319	-3.85869	0.290645	0.589822	0.999816	species_specific
19:16081912-16086540	0	2.02641	0	0	0	3.86032	-0.615742	0.177456	-2.49446	0.29583	0.590226	0.999816	species_specific
17:8508553-8509949	1.68571	0.921094	0.841217	0.985572	0.784511	1.68111	0.348389	0.213186	-2.22981	0.289666	0.590449	0.999816	MMU_CIRCpedia_216320
17:82563353-82571870	0	0.429844	0	0.394229	0	0.871686	-1.18366	0.0786312	-3.66875	0.289637	0.590468	0.999816	MMU_CIRCpedia_5402
9:14639895-14680162	0	0.49125	1.19172	1.24839	0	0	0.800321	0.112424	-3.15297	0.289096	0.590815	0.999816	MMU_CIRCpedia_31126
10:72340788-72341170	0	0.245625	0	0.854162	0	0	-1.31837	0.0642086	-3.96109	0.288191	0.591396	0.999816	species_specific
4:2949933-2951245	2.59881	2.57906	1.96284	3.08813	1.6344	3.23769	0.193359	0.414882	-1.26923	0.287869	0.591604	0.999816	species_specific
8:105419143-105444381	1.75595	2.02641	1.26183	1.97114	2.54966	2.92637	-0.220564	0.346101	-1.53073	0.287108	0.592094	0.999816	MMU_CIRCpedia_19447
17:58999380-59001714	0.983333	0.859687	0.701014	0.459934	0.915263	0.871686	0.507456	0.160571	-2.63872	0.285429	0.593179	0.999816	species_specific
13:111217678-111233293	0	0.245625	0	0	0.784511	0	-1.31424	0.0639205	-3.96758	0.285353	0.593228	0.999816	MMU_CIRCpedia_4379
9:17226202-17236588	0.632143	0.429844	0	0.525638	0.719135	1.05848	-0.750827	0.120504	-3.05285	0.283811	0.594228	0.999816	MMU_CIRCpedia_31866
4:73118687-73125312	0.421429	0.368437	0	0.394229	0	0	1.27309	0.0689651	-3.85799	0.283581	0.594378	0.999816	species_specific
9:121161855-121166180	0.842857	0.245625	0.49071	0.788458	1.6344	0.560369	-0.557695	0.151808	-2.71968	0.283337	0.594536	0.999816	species_specific
5:65988634-65994864	0.491667	1.22812	0	0.919867	0	0.311316	0.791535	0.111774	-3.16135	0.2827	0.594951	0.999816	MMU_CIRCpedia_1069
2:205300529-205301701	0.913095	0	0	0.788458	1.30752	0	-0.798187	0.113206	-3.14298	0.282521	0.595067	0.999816	MMU_CIRCpedia_25239
6:125855019-125855240	0	0.552656	0.560811	0	0.588383	0	1.1154	0.0827316	-3.59542	0.282364	0.59517	0.999816	species_specific
17:76287191-76290077	0	0.368437	0.560811	0	0.457631	0	1.20816	0.0748313	-3.74021	0.281772	0.595556	0.999816	species_specific
14:34586229-34609742	0.632143	0	0	0	0	0.311316	1.29674	0.0637124	-3.97228	0.281375	0.595815	0.999816	MMU_CIRCpedia_22956
6:72295936-72333835	0.632143	0	0	0	0	0.311316	1.29674	0.0637124	-3.97228	0.281375	0.595815	0.999816	species_specific
9:137728348-137744090	0	0.429844	0	0	0.588383	0.622633	-1.17008	0.0782038	-3.67662	0.28015	0.596617	0.999816	MMU_CIRCpedia_14270
9:131455075-131459356	0.491667	1.28953	0	1.24839	0.719135	1.24527	-0.512738	0.158309	-2.65919	0.279192	0.597245	0.999816	species_specific
10:68459103-68470163	0	0.675469	0.350507	0.657048	0.915263	0.622633	-0.7663	0.116241	-3.10481	0.278832	0.597482	0.999816	species_specific
5:177536357-177539147	0.561905	0.859687	0.630913	0.591343	0.457631	0.560369	0.673817	0.131387	-2.92811	0.278806	0.597499	0.999816	MMU_CIRCpedia_225725
9:137752330-137758011	1.19405	0.798281	1.05152	1.70832	0.653759	0.622633	0.392792	0.190546	-2.39179	0.277387	0.598433	0.999816	species_specific
5:14316512-14336727	0.702381	0	0.49071	0.394229	0	0.37358	1.01422	0.0897225	-3.47839	0.276359	0.599112	0.999816	species_specific
14:102194937-102197847	0	0.368437	0.420608	0.394229	0	0	1.25732	0.0687708	-3.86206	0.276212	0.599209	0.999816	species_specific
9:76067954-76107351	0	0.798281	0	0.591343	0.849887	0.37358	-0.882022	0.101027	-3.30719	0.274175	0.600558	0.999816	MMU_CIRCpedia_12016
7:50703820-50756056	0.280952	0	0	0	0.392256	0.560369	-1.266	0.0689681	-3.85793	0.27311	0.601267	0.999816	species_specific
1:154234590-154246375	0	0.307031	0	0.262819	0.261504	0.435843	-1.25624	0.0688817	-3.85974	0.272391	0.601746	0.999816	species_specific
19:5641593-5641946	0.491667	0	0.280406	0.262819	0.784511	0.809422	-0.861978	0.103497	-3.27233	0.272176	0.601889	0.999816	species_specific
9:131506113-131506453	0	0.736875	0	0.919867	0.457631	0.37358	-0.920309	0.0974038	-3.35988	0.272003	0.602005	0.999816	species_specific
16:15664735-15667439	0.632143	0	0.280406	0.525638	0	0	1.17345	0.0760954	-3.71605	0.271221	0.602528	0.999816	species_specific
8:102287432-102288266	2.87976	1.965	2.45355	2.82531	4.05331	3.54901	-0.171385	0.479609	-1.06007	0.270795	0.602813	0.999816	MMU_CIRCpedia_224290
1:12578717-12579412	0	0.552656	0.420608	0.525638	0	0	1.16209	0.0764512	-3.70932	0.270427	0.603059	0.999816	species_specific
14:72714422-72731934	0	0	0.280406	0.985572	0	0	-1.26078	0.0684771	-3.86824	0.269515	0.603671	0.999816	MMU_CIRCpedia_31246
8:97686667-97691188	0.280952	0.552656	0	0	0.392256	0	1.22576	0.0703852	-3.82858	0.268817	0.60414	0.999816	MMU_CIRCpedia_17088
17:59731420-59738947	0	0.675469	0.420608	1.3798	0.392256	0.560369	-0.727556	0.120226	-3.05618	0.267652	0.604925	0.999816	MMU_CIRCpedia_32532
10:12081471-12091684	0	0.675469	0	1.11698	0	0.560369	-0.955565	0.0936033	-3.4173	0.267647	0.604928	0.999816	species_specific
15:42515236-42528420	0	0.245625	0	0.394229	0.392256	0	-1.26345	0.0633405	-3.98073	0.265408	0.606443	0.999816	species_specific
4:39737419-39755739	1.82619	1.78078	0	1.97114	1.56902	1.99242	-0.268312	0.261816	-1.93337	0.26497	0.60674	0.999816	MMU_CIRCpedia_26199
2:232014834-232015671	0.632143	0.614062	0.771115	1.24839	0.392256	0	0.65828	0.131205	-2.93011	0.264364	0.607151	0.999816	MMU_CIRCpedia_213825
1:193141849-193152444	0.491667	0	0.420608	0.591343	0.849887	0.622633	-0.777532	0.11195	-3.15908	0.263825	0.607518	0.999816	MMU_CIRCpedia_9372
2:203380207-203402734	0	0.552656	0	0.262819	0	0	1.19999	0.0590461	-4.08202	0.263088	0.60802	0.999816	MMU_CIRCpedia_24892
19:37425867-37426378	0.632143	0.368437	0	0	0	0.560369	1.11658	0.0790612	-3.66089	0.263063	0.608037	0.999816	species_specific
1:66946149-66959743	0.561905	0.614062	0.701014	1.05128	0	0.435843	0.698873	0.123453	-3.01797	0.262445	0.608459	0.999816	species_specific
10:5785851-5800705	0.421429	0.614062	0.350507	0	0.457631	0.435843	0.900623	0.0972885	-3.36159	0.261444	0.609143	0.999816	species_specific
3:43299753-43303792	0.632143	0.368437	0	0.262819	1.37289	0.498106	-0.74646	0.115961	-3.10829	0.261146	0.609348	0.999816	MMU_CIRCpedia_5705
17:7499038-7499491	0.421429	0	0	0.394229	0.849887	0	-1.11507	0.079661	-3.64998	0.258133	0.611419	0.999816	species_specific
9:131436619-131439061	0	0.368437	1.54223	0.591343	0	0.933949	0.680471	0.125974	-2.9888	0.257945	0.611548	0.999816	species_specific
X:130024989-130025379	0.772619	0.552656	0	0.657048	0.849887	1.12074	-0.629264	0.135017	-2.88879	0.256782	0.612353	0.999816	species_specific
10:124681606-124682379	0.632143	0.245625	0	0.459934	0.588383	0.933949	-0.788542	0.108453	-3.20485	0.256224	0.61274	0.999816	MMU_CIRCpedia_7866
12:1110191-1116033	0	0.368437	0	0.722753	0	0.37358	-1.17118	0.0729633	-3.77669	0.25435	0.614042	0.999816	species_specific
7:103321931-103322632	0	0.429844	0	0	0.784511	0.37358	-1.12266	0.0771703	-3.69581	0.25275	0.615159	0.999816	species_specific
19:32887751-32918339	0	0.368437	0	0	0.784511	0.249053	-1.1716	0.0727644	-3.78062	0.252695	0.615197	0.999816	species_specific
1:13778417-13782831	1.89643	0	0.280406	1.05128	0.392256	0.498106	0.562062	0.145003	-2.78584	0.252169	0.615565	0.999816	species_specific
12:122288488-122316855	0	0.49125	0.701014	1.24839	0.523007	0.684896	-0.673686	0.126407	-2.98385	0.25146	0.616062	0.999816	species_specific
5:151790322-151791062	0.561905	0.429844	0.280406	0.854162	0	0	0.93371	0.0925649	-3.43339	0.251278	0.61619	0.999816	species_specific
17:56848695-56856625	0	0.859687	1.05152	0.459934	0.457631	0.560369	0.677606	0.124234	-3.00887	0.250417	0.616795	0.999816	species_specific
15:50449399-50459162	0	0.429844	0	0	0.719135	0.435843	-1.1155	0.077044	-3.69817	0.249023	0.617777	0.999816	species_specific
16:48277337-48303305	0.421429	0.368437	0	0	0.392256	0	1.18621	0.0695622	-3.84555	0.24849	0.618153	0.999816	MMU_CIRCpedia_32531
12:12635776-12635974	0.561905	0.49125	0.350507	0.459934	1.11139	1.12074	-0.590395	0.139159	-2.8452	0.245599	0.620204	0.999816	species_specific
18:25322007-25322187	2.24762	1.71937	1.40203	2.16826	2.15741	1.55658	0.215374	0.3214	-1.63756	0.245347	0.620383	0.999816	MMU_CIRCpedia_8803
6:18212487-18213781	0	0	0.49071	0.919867	0.457631	0	-1.03579	0.0836896	-3.57881	0.244723	0.620828	0.999816	species_specific
15:43814500-43815074	0.702381	0	0.841217	1.18269	0.392256	1.36979	-0.533386	0.148901	-2.74758	0.244638	0.620889	0.999816	species_specific
19:32915336-32926273	0.35119	0	0.420608	1.3798	0	0.498106	-0.826117	0.102286	-3.28932	0.244263	0.621157	0.999816	species_specific
5:137985256-137988315	2.73929	5.58797	3.50507	5.58491	3.92256	4.17164	0.13445	0.668396	-0.581225	0.244132	0.62125	0.999816	species_specific
16:74915869-74916259	0	0	0.420608	0	1.17677	0	-1.09519	0.0785152	-3.67088	0.243823	0.621471	0.999816	species_specific
14:30929200-30956242	0.35119	0	0.350507	0	0	0.37358	1.20107	0.0669843	-3.90003	0.243183	0.621929	0.999816	MMU_CIRCpedia_22137
15:93000511-93009323	1.05357	2.02641	1.12162	0.919867	2.02665	1.43205	0.264123	0.253302	-1.98107	0.242585	0.622358	0.999816	species_specific
6:30650993-30651466	0	0.307031	0.280406	0.525638	0.523007	0.435843	-0.965807	0.0885389	-3.49755	0.242055	0.622738	0.999816	species_specific
19:34430575-34438766	1.75595	0.614062	0.771115	1.83973	1.6344	1.43205	-0.28335	0.238254	-2.06943	0.241708	0.622988	0.999816	MMU_CIRCpedia_224006
10:15135273-15141557	0.702381	0	0	0.394229	0	0	1.19171	0.0673	-3.89325	0.24046	0.623887	0.999816	MMU_CIRCpedia_16768
5:88804597-88823930	0	0	0.350507	0.854162	0	0.249053	-1.14101	0.0732039	-3.77194	0.239801	0.624362	0.999816	MMU_CIRCpedia_31344
2:72731006-72733118	0	1.65797	0	1.57692	1.37289	0	-0.525424	0.14816	-2.75477	0.239659	0.624465	0.999816	MMU_CIRCpedia_218952
2:127057472-127059155	0.421429	0.675469	0	0	0.261504	0.37358	1.01537	0.08298	-3.59109	0.237522	0.626014	0.999816	species_specific
9:37424844-37426654	1.82619	1.41234	1.82264	2.16826	1.56902	1.80563	0.21978	0.304998	-1.71313	0.235489	0.627496	0.999816	species_specific
4:169507036-169537911	0.280952	0.245625	0	0	0.261504	0	1.14382	0.0592956	-4.07593	0.234305	0.628363	0.999816	MMU_CIRCpedia_25017
13:21045684-21046230	0.491667	0.614062	0.49071	0.394229	0.784511	0	0.736613	0.109767	-3.18749	0.234088	0.628522	0.999816	MMU_CIRCpedia_23936
16:68266592-68266721	0.913095	0.675469	0.771115	0.591343	0.653759	0.871686	0.497589	0.152468	-2.71342	0.233782	0.628746	0.999816	species_specific
3:119500694-119517315	0.702381	0.552656	0	0.854162	0	0	0.903913	0.0918786	-3.44413	0.232663	0.629569	0.999816	species_specific
16:1809237-1809833	0	0.675469	0.560811	0.459934	0.32688	0	0.922631	0.0898463	-3.4764	0.232083	0.629996	0.999816	species_specific
1:231818328-231818517	0	0.675469	0	0.985572	0	0.622633	-0.901175	0.0921496	-3.43988	0.231332	0.630551	0.999816	species_specific
2:36396613-36464655	0.421429	0	0	0.262819	0.392256	0.560369	-1.0623	0.0787135	-3.66724	0.231215	0.630637	0.999816	MMU_CIRCpedia_29837
4:73115820-73125312	0	0.49125	0	1.3141	0	0	-1.03093	0.0805613	-3.63377	0.229961	0.631565	0.999816	species_specific
17:60633852-60648082	0	0.614062	0.49071	0.459934	1.37289	0.37358	-0.678886	0.11947	-3.06527	0.229899	0.631611	0.999816	species_specific
5:168559031-168568998	0	0.675469	0	0.788458	0	0.809422	-0.897929	0.09207	-3.44112	0.229337	0.632029	0.999816	MMU_CIRCpedia_17863
4:17501718-17509363	0	0.552656	0	0	0.261504	0	1.12184	0.059427	-4.07274	0.228214	0.632863	0.999816	MMU_CIRCpedia_39590
7:157163809-157170450	0	0.552656	0	0	0.261504	0	1.12184	0.059427	-4.07274	0.228214	0.632863	0.999816	MMU_CIRCpedia_15512
8:47396375-47440542	0	0.552656	0	0	0.261504	0	1.12184	0.059427	-4.07274	0.228214	0.632863	0.999816	species_specific
6:36524340-36525642	0.280952	0.429844	1.12162	0.854162	0.32688	0.311316	0.650382	0.123122	-3.02184	0.22559	0.634826	0.999816	MMU_CIRCpedia_217526
18:9583116-9595153	0.561905	0.614062	0	0.591343	1.17677	0.560369	-0.646217	0.124198	-3.00928	0.223995	0.636025	0.999816	species_specific
11:118786051-118786518	0	0.307031	0	0	0.849887	0	-1.15284	0.0670486	-3.89865	0.222653	0.637038	0.999816	species_specific
1:150440922-150446401	0	0	0.420608	0.591343	0	0.622633	-1.0489	0.0778784	-3.68263	0.222469	0.637177	0.999816	MMU_CIRCpedia_215768
5:53646232-53658624	0.35119	0	0.841217	0.525638	0	0.311316	0.894841	0.0910313	-3.45749	0.222383	0.637242	0.999816	MMU_CIRCpedia_3682
4:82356536-82356895	0	0.245625	0	0	0.457631	0.249053	-1.15132	0.0618872	-4.01422	0.222217	0.637368	0.999816	species_specific
6:30580405-30582507	0.561905	0	0.841217	0	0.653759	0.37358	0.780223	0.1025	-3.2863	0.222054	0.637492	0.999816	NA
12:92798891-92799086	0	0.49125	0	0.525638	0	0.747159	-1.0145	0.0802498	-3.63936	0.221602	0.637834	0.999816	species_specific
19:17101659-17102557	1.19405	1.41234	0.49071	0.525638	1.83053	0.684896	0.341731	0.193721	-2.36795	0.22054	0.638641	0.999816	MMU_CIRCpedia_27749
8:68030496-68060779	0.35119	0	0.420608	0.459934	0	0	1.11034	0.070566	-3.82488	0.22031	0.638816	0.999816	species_specific
11:114063210-114064568	0.632143	0.736875	0.49071	0.919867	0.588383	0	0.63643	0.123867	-3.01313	0.219131	0.639715	0.999816	MMU_CIRCpedia_37904
14:31133237-31133675	0	0.552656	0.560811	0.657048	0.588383	0.996212	-0.660502	0.119722	-3.06224	0.219031	0.639791	0.999816	MMU_CIRCpedia_22192
12:131992172-132006302	0	0	0.49071	0	0.261504	0	1.09719	0.0585784	-4.09349	0.217278	0.641134	0.999816	species_specific
7:130120748-130122202	0	0.798281	0	0	0.392256	0	1.10579	0.068855	-3.86029	0.216693	0.641584	0.999816	species_specific
19:11058254-11060187	0	0.9825	1.12162	1.05128	0	0.747159	0.566222	0.135694	-2.88157	0.215573	0.642446	0.999816	species_specific
11:130109428-130110661	0.702381	1.04391	0	0.985572	0.392256	0	0.660884	0.116723	-3.09883	0.213094	0.644365	0.999816	species_specific
8:140572811-140585311	0	0	0.630913	0.459934	0.523007	0.560369	-0.874772	0.0917961	-3.44542	0.212673	0.644692	0.999816	species_specific
20:36607714-36609730	0.421429	0	0	0.459934	0	0.747159	-1.02272	0.0780275	-3.67987	0.212217	0.645047	0.999816	species_specific
X:53645310-53654131	0	0.552656	0	0	1.04601	0.249053	-0.954587	0.0836514	-3.57947	0.211272	0.645784	0.999816	MMU_CIRCpedia_10255
11:86022366-86031611	0.842857	0.614062	0.771115	0.657048	0.588383	0.747159	0.505645	0.145922	-2.77673	0.210552	0.646347	0.999816	MMU_CIRCpedia_33651
1:31346639-31348974	0.491667	0	0	0.919867	0	0.435843	-0.966397	0.0830277	-3.59026	0.210475	0.646407	0.999816	MMU_CIRCpedia_7489
3:50065030-50066502	3.65238	2.14922	1.96284	4.46793	2.48428	4.04711	-0.146212	0.502509	-0.992779	0.210035	0.646751	0.999816	species_specific
6:89846561-89857199	0.280952	0	0	0.262819	0	0.622633	-1.12363	0.0669005	-3.90184	0.210016	0.646766	0.999816	species_specific
6:166430452-166432490	0	0.736875	0	0	0	0.37358	1.10773	0.0665363	-3.90972	0.209786	0.646947	0.999816	species_specific
12:68828770-68836749	0	0.49125	0	0.262819	0	0	1.04783	0.0574644	-4.12119	0.209435	0.647223	0.999816	MMU_CIRCpedia_4320
18:9588088-9595102	0	0	0.560811	0	0	0.311316	1.10908	0.0614826	-4.02368	0.209419	0.647235	0.999816	species_specific
3:131162407-131170887	0	0.429844	0	0.262819	0.588383	0.249053	-1.0344	0.0754813	-3.72774	0.20883	0.647698	0.999816	species_specific
11:77683709-77693611	0.702381	0	0	0	0.392256	0	1.10355	0.0678984	-3.88048	0.208348	0.648077	0.999816	species_specific
4:55411613-55417985	0.983333	1.22812	1.12162	2.36537	1.11139	1.61884	-0.254416	0.244666	-2.03111	0.207749	0.648549	0.999816	species_specific
7:102227366-102227669	0.280952	0.614062	0.911318	0.722753	0.261504	0.498106	0.625282	0.121723	-3.03833	0.204881	0.650821	0.999816	MMU_CIRCpedia_8381
7:140702865-140704963	0	0.368437	0	0	0.588383	0.37358	-1.06607	0.0709727	-3.81659	0.203494	0.651927	0.999816	MMU_CIRCpedia_227294
5:140440118-140449305	2.17738	3.19312	2.73395	3.54806	2.81116	2.92637	0.149038	0.470996	-1.08621	0.20285	0.652442	0.999816	MMU_CIRCpedia_18142
3:197832196-197839397	0	0.429844	0.280406	0.394229	0	0	1.09409	0.0664845	-3.91084	0.202813	0.652471	0.999816	species_specific
13:113520615-113539507	0	0	0.280406	0	0.457631	0.37358	-1.10987	0.0661064	-3.91907	0.202564	0.652671	0.999816	species_specific
13:110622215-110624279	0	0.552656	0	0.985572	0	0.37358	-0.935099	0.0834051	-3.58372	0.202464	0.652751	0.999816	MMU_CIRCpedia_213549
7:33146241-33177591	0	0.798281	0	0.657048	0.784511	0.249053	-0.784009	0.098119	-3.34932	0.202143	0.653008	0.999816	MMU_CIRCpedia_13559
11:65894013-65897006	0	0.429844	0	0.262819	0.457631	0.37358	-1.01906	0.07523	-3.73255	0.202052	0.653081	0.999816	species_specific
2:61106562-61118116	0	0.736875	0	0.394229	0	0	1.08455	0.0666875	-3.90644	0.201712	0.653354	0.999816	species_specific
18:54277702-54287411	0.561905	0.614062	0	0	0.392256	0.37358	0.872988	0.0884841	-3.49844	0.201492	0.653531	0.999816	species_specific
14:80743074-80778046	0.491667	0.429844	0	0	0.719135	1.183	-0.699468	0.107847	-3.21294	0.200813	0.654077	0.999816	MMU_CIRCpedia_34006
2:99412730-99435941	0.491667	0	0	0	0	1.30753	-0.947203	0.0826593	-3.59668	0.20068	0.654184	0.999816	species_specific
16:1625972-1632365	0	1.10531	0	0.328524	0.32688	0	0.935081	0.0824175	-3.60091	0.200589	0.654257	0.999816	species_specific
X:80707426-80719656	0	0.429844	0.350507	0	0	0.435843	1.05822	0.0696988	-3.84272	0.200365	0.654438	0.999816	species_specific
17:30178070-30179297	0	0.245625	0	0.394229	0	0.311316	-1.08272	0.0611922	-4.03051	0.199766	0.654921	0.999816	species_specific
20:35729311-35732135	3.37143	5.03531	5.0473	5.4535	6.40684	6.53764	-0.110812	0.825428	-0.276785	0.199343	0.655263	0.999816	species_specific
10:103438014-103438808	1.19405	1.53516	0.49071	0.919867	0.980639	1.36979	0.308737	0.200755	-2.31649	0.198251	0.656148	0.999816	species_specific
6:130052858-130057497	0	0.429844	0.841217	0.788458	0	1.68111	-0.583546	0.128892	-2.95576	0.198182	0.656204	0.999816	species_specific
15:41696074-41699159	0.421429	1.22812	0.630913	1.51121	0	0.560369	0.486821	0.146053	-2.77544	0.198135	0.656242	0.999816	MMU_CIRCpedia_4977
10:32019857-32021287	0.632143	0.798281	0	1.44551	0	1.24527	-0.537639	0.137211	-2.86553	0.197873	0.656455	0.999816	species_specific
1:44757555-44758140	0	0.614062	0	0.328524	0	0	1.06849	0.0620801	-4.00973	0.197773	0.656536	0.999816	species_specific
2:61300950-61301454	0.491667	0.798281	0	0.919867	0	0	0.812891	0.0936682	-3.4163	0.19696	0.657197	0.999816	species_specific
12:56666203-56670364	0.702381	0.675469	0	1.44551	0	1.183	-0.54973	0.134689	-2.8923	0.196447	0.657616	0.999816	species_specific
X:10063444-10110020	0	0.245625	0	0	0	0.684896	-1.06791	0.061044	-4.03401	0.195148	0.658678	0.999816	species_specific
14:69116365-69122360	0	0.307031	0	0.591343	0.261504	0	-1.08235	0.0661704	-3.91767	0.19485	0.658922	0.999816	MMU_CIRCpedia_30479
1:13769117-13782831	0.421429	0	0	0	0	0.249053	1.01489	0.0563412	-4.14967	0.194614	0.659115	0.999816	species_specific
1:246621428-246634587	0.421429	0	0	0	0	0.249053	1.01489	0.0563412	-4.14967	0.194614	0.659115	0.999816	species_specific
12:124426621-124437996	0.421429	0	0	0	0	0.249053	1.01489	0.0563412	-4.14967	0.194614	0.659115	0.999816	species_specific
1:21701497-21703618	2.52857	2.14922	2.80406	2.89101	1.69977	3.98485	0.152887	0.440066	-1.18421	0.194125	0.659517	0.999816	species_specific
22:38245934-38248019	0.632143	0.614062	0.49071	0.985572	0.915263	1.12074	-0.442342	0.155113	-2.68861	0.193396	0.660116	0.999816	species_specific
10:70525922-70531454	0.632143	0	0	0	0	0.37358	1.07121	0.0651606	-3.93986	0.192348	0.660981	0.999816	species_specific
10:63610186-63619800	1.19405	0.675469	0	1.11698	1.37289	0.684896	-0.409336	0.16284	-2.61848	0.191782	0.661449	0.999816	species_specific
2:58221941-58232112	1.82619	1.965	1.68243	2.23396	2.68041	1.183	0.186893	0.328749	-1.60494	0.191495	0.661686	0.999816	MMU_CIRCpedia_14757
8:60741258-60743097	3.09048	1.10531	1.61233	3.81088	1.76515	2.80185	-0.165628	0.390466	-1.35673	0.191421	0.661748	0.999816	MMU_CIRCpedia_32874
7:39686630-39696859	0	0.49125	0	0.854162	0	0.37358	-0.953398	0.0789718	-3.66252	0.19134	0.661815	0.999816	species_specific
1:149964221-149965878	0	0.798281	0	0.394229	0.588383	0.684896	-0.765511	0.0976178	-3.35671	0.190571	0.662453	0.999816	MMU_CIRCpedia_35306
9:35546429-35548535	0.35119	1.41234	0	1.83973	0.457631	0.747159	-0.44483	0.152927	-2.70909	0.18973	0.663152	0.999816	species_specific
5:66053405-66054951	0	0.736875	0.280406	0	0	0.622633	0.932579	0.0799479	-3.6448	0.189412	0.663418	0.999816	MMU_CIRCpedia_1048
1:204112914-204117707	0.35119	0.614062	0.630913	0.394229	1.76515	0.622633	-0.47528	0.146943	-2.76667	0.187999	0.664598	0.999816	MMU_CIRCpedia_38295
4:17814852-17815358	0.702381	0.429844	1.26183	0	1.24214	0.996212	0.422621	0.157845	-2.66342	0.186999	0.665437	0.999816	species_specific
16:80684537-80685129	18.1917	20.5711	16.614	27.5303	22.4893	23.7223	-0.0658205	3.22698	1.69018	0.186843	0.665568	0.999816	MMU_CIRCpedia_4128
17:31155982-31169997	0	0	0.420608	0	0	0.249053	0.989452	0.0561603	-4.1543	0.186188	0.66612	0.999816	MMU_CIRCpedia_30125
19:5047475-5082504	0.561905	0	0	0.459934	0.915263	0	-0.86801	0.0866434	-3.52877	0.185978	0.666297	0.999816	species_specific
3:129585951-129586719	0	0	0.420608	0.394229	0	0.747159	-0.96946	0.0763808	-3.71065	0.185141	0.667002	0.999816	species_specific
8:67131950-67137603	1.68571	2.9475	1.96284	3.48235	3.20342	2.61506	-0.1514	0.428683	-1.22202	0.18408	0.667901	0.999816	species_specific
5:64788950-64804386	1.75595	0.859687	0	1.05128	1.17677	1.8679	-0.292882	0.204364	-2.29079	0.183646	0.66827	0.999816	MMU_CIRCpedia_1354
1:1804418-1817875	0	0	0.630913	0	0	0.37358	1.0434	0.0648734	-3.94623	0.183152	0.668689	0.999816	MMU_CIRCpedia_10612
10:68786135-68786692	0	0.368437	0	0.985572	0	0	-1.0136	0.0702381	-3.8316	0.183106	0.668729	0.999816	MMU_CIRCpedia_25373
21:15833347-15842540	3.93333	8.22844	5.32771	6.70189	5.6877	8.28101	0.0973824	0.980165	-0.0289036	0.181083	0.670455	0.999816	species_specific
20:47246007-47246517	0.421429	0.798281	0	0.722753	0.588383	0.996212	-0.579554	0.123724	-3.0148	0.180451	0.670997	0.999816	species_specific
12:46364027-46364388	0.35119	0.49125	0	0.525638	0	0	0.973202	0.0730847	-3.77429	0.179561	0.671762	0.999816	NA
10:13172375-13172765	0.280952	0	0.560811	0.722753	0.588383	0.498106	-0.693141	0.103734	-3.26904	0.178829	0.672392	0.999816	species_specific
14:55653016-55658614	0	0	0.420608	0.262819	0	0	0.969043	0.0562589	-4.15178	0.178308	0.672842	0.999816	species_specific
15:78470531-78471924	0	0	0.420608	0.262819	0	0	0.969043	0.0562589	-4.15178	0.178308	0.672842	0.999816	MMU_CIRCpedia_219135
1:211778917-211793190	0.702381	0	0.49071	0	0.261504	0.622633	0.782516	0.0929546	-3.42733	0.177506	0.673536	0.999816	MMU_CIRCpedia_12686
1:243613670-243664883	0	0.368437	0	0.394229	0	0.560369	-0.997158	0.0700099	-3.8363	0.17693	0.674035	0.999816	MMU_CIRCpedia_12095
14:57244164-57247712	0	0.368437	0	0.394229	0	0.560369	-0.997158	0.0700099	-3.8363	0.17693	0.674035	0.999816	MMU_CIRCpedia_21461
3:129265548-129267099	0	0	0.630913	0.394229	0	0	1.01999	0.0650261	-3.94284	0.174934	0.675774	0.999816	species_specific
6:79042842-79060818	0.702381	0	0.841217	0.591343	0.457631	0.249053	0.625658	0.112102	-3.15712	0.174751	0.675935	0.999816	MMU_CIRCpedia_31176
6:57193841-57210445	0	1.04391	1.26183	0.657048	1.43827	0	0.440703	0.149764	-2.73924	0.174328	0.676304	0.999816	species_specific
4:1900625-1935262	0	0.675469	0.49071	0.591343	0.261504	1.36979	-0.584722	0.120191	-3.0566	0.174026	0.676569	0.999816	MMU_CIRCpedia_17011
8:130152735-130180880	6.25119	6.81609	4.55659	8.08169	7.3221	8.4678	-0.0924588	1.06242	0.0873563	0.1736	0.676943	0.999816	MMU_CIRCpedia_25781
14:80743074-80761613	0.561905	0.245625	0	0.525638	0	0	0.96277	0.0726611	-3.78267	0.173396	0.677122	0.999816	MMU_CIRCpedia_228372
4:2954423-2956811	0.421429	0.614062	0.630913	0.919867	0.849887	1.12074	-0.440875	0.15004	-2.73658	0.173373	0.677142	0.999816	species_specific
2:189791789-189818180	0	0.245625	0.49071	0.459934	0.523007	0.622633	-0.752209	0.0956137	-3.38664	0.172822	0.677626	0.999816	MMU_CIRCpedia_22574
8:66601697-66602523	0	1.41234	0	1.3798	0.588383	0.560369	-0.526442	0.131823	-2.92332	0.172409	0.67799	0.999816	species_specific
15:75859877-75873568	5.3381	6.07922	5.53801	6.50478	6.47222	7.16027	0.096013	0.962703	-0.0548373	0.171955	0.678391	0.999816	species_specific
10:92893348-92920050	0	0.245625	0	0	0.261504	0.37358	-0.993091	0.0600998	-4.0565	0.171824	0.678506	0.999816	MMU_CIRCpedia_18615
7:111935539-111989163	0.632143	0.245625	0	0.591343	0	0	0.927002	0.0761095	-3.71578	0.171462	0.678827	0.999816	MMU_CIRCpedia_219237
8:47396375-47407961	0	0.736875	0.560811	1.64262	0	0.809422	-0.546218	0.127821	-2.9678	0.171457	0.678831	0.999816	species_specific
11:46508190-46512813	0.280952	0.49125	0.280406	0	0.261504	0.435843	0.853988	0.0834849	-3.58234	0.170815	0.679399	0.999816	MMU_CIRCpedia_34211
11:120406117-120407823	0	0.614062	0.49071	0	0	0.747159	0.828886	0.085467	-3.54849	0.17005	0.680078	0.999816	MMU_CIRCpedia_19992
19:57455652-57456182	0.983333	0.675469	0.420608	0.394229	0	1.49432	0.487563	0.138822	-2.84869	0.169544	0.680528	0.999816	species_specific
4:153394261-153397333	1.12381	1.59656	0.911318	0.985572	2.22278	0.622633	0.247877	0.226255	-2.14398	0.169479	0.680586	0.999816	species_specific
5:43161248-43161931	0.702381	0.49125	0.350507	0.985572	0	0.311316	0.622739	0.11014	-3.18258	0.169291	0.680753	0.999816	species_specific
3:149846010-149921227	0	0.368437	0.420608	0.459934	0.457631	0.747159	-0.718782	0.0980878	-3.34978	0.168953	0.681054	0.999816	species_specific
5:95755395-95763620	0.561905	0.736875	0	0	0.915263	0	0.738493	0.0955545	-3.38753	0.16893	0.681075	0.999816	species_specific
19:32915336-32918339	0	0.614062	0	0	0.32688	0	0.984125	0.0625617	-3.99858	0.167687	0.682186	0.999816	species_specific
11:12236176-12239585	0.772619	0	0	0.525638	0	0	0.952459	0.0722334	-3.79119	0.167366	0.682474	0.999816	MMU_CIRCpedia_226967
5:138810037-138812302	0	0.245625	0.280406	0.591343	0.653759	0	-0.871406	0.0815885	-3.61549	0.167282	0.682549	0.999816	MMU_CIRCpedia_17647
1:13773077-13782831	0.632143	0.675469	0	0.591343	0.457631	1.36979	-0.53408	0.12908	-2.95366	0.167127	0.682689	0.999816	MMU_CIRCpedia_9316
5:159272022-159275246	0.35119	0	0	0.262819	0.261504	0.435843	-0.96736	0.0707883	-3.82034	0.166252	0.683475	0.999816	species_specific
15:59091058-59092640	0.702381	0.675469	0	0	0.719135	0.311316	0.687522	0.10042	-3.31588	0.166188	0.683533	0.999816	species_specific
10:68393137-68394451	0	0.429844	0	0	0.457631	0.560369	-0.934975	0.0737132	-3.76193	0.165957	0.683741	0.999816	species_specific
8:51860844-51861246	6.53214	11.2373	8.90288	10.7099	10.1333	11.1451	0.0776051	1.49125	0.576527	0.163343	0.686107	0.999816	MMU_CIRCpedia_27728
1:32187953-32190249	0	0	0.350507	0.459934	0	0.498106	-0.959573	0.0702036	-3.83231	0.162855	0.686551	0.999816	species_specific
21:46399589-46402483	0	0.552656	0	0	0	0.311316	0.95301	0.0603766	-4.04987	0.162573	0.686809	0.999816	species_specific
8:123337624-123339446	0.35119	0.429844	0	0.262819	0.915263	0.435843	-0.711897	0.0973202	-3.36112	0.162281	0.687075	0.999816	species_specific
17:6087989-6095223	0.421429	2.08781	0	0.854162	1.04601	0.435843	0.3887	0.157728	-2.66449	0.162155	0.687191	0.999816	species_specific
X:10063444-10098579	0.632143	1.04391	1.05152	1.05128	1.30752	1.80563	-0.268298	0.208087	-2.26474	0.16175	0.68756	0.999816	species_specific
6:144537581-144551082	0	0	0.771115	0.262819	0	0.249053	0.936794	0.0717656	-3.80056	0.160808	0.688423	0.999816	species_specific
4:128936654-128943188	0	0.429844	0	0	0	0.249053	0.897494	0.055785	-4.16398	0.1596	0.689535	0.999816	MMU_CIRCpedia_37503
8:68017845-68060779	0	0.429844	0	0	0	0.249053	0.897494	0.055785	-4.16398	0.1596	0.689535	0.999816	MMU_CIRCpedia_226680
10:93381218-93389154	1.12381	0.9825	0.49071	1.11698	0.784511	0.684896	0.351338	0.16882	-2.56644	0.159411	0.68971	0.999816	species_specific
20:62139074-62140944	0.842857	1.71937	1.19172	2.23396	1.8959	1.36979	-0.205435	0.265149	-1.91512	0.159261	0.689848	0.999816	species_specific
15:58886974-58887540	0.842857	0.736875	1.19172	1.18269	1.30752	1.74337	-0.260845	0.211831	-2.23901	0.158984	0.690104	0.999816	species_specific
X:136236243-136244795	0	0.368437	0.350507	0	0	0.435843	0.952797	0.0681109	-3.87597	0.158855	0.690223	0.999816	species_specific
9:135881632-135883078	2.66905	4.23703	4.13598	5.05927	4.38019	5.66596	-0.107752	0.682609	-0.550868	0.15859	0.690468	0.999816	MMU_CIRCpedia_14685
5:177191883-177212195	0	0	0.350507	0	0.653759	0.249053	-0.94822	0.0698443	-3.83971	0.157739	0.691257	0.999816	MMU_CIRCpedia_23107
3:133623090-133624175	0.421429	0	0	0	0.261504	0	0.916859	0.0568218	-4.13741	0.157638	0.691351	0.999816	MMU_CIRCpedia_960
1:150226607-150229237	0	0.9825	0.841217	1.44551	0.784511	0.809422	-0.392164	0.156156	-2.67894	0.156483	0.692426	0.999816	species_specific
6:18236451-18237516	0	0.49125	0	0.525638	0	0.622633	-0.874332	0.077434	-3.69089	0.156464	0.692444	0.999816	MMU_CIRCpedia_222429
5:94868332-94912976	0	0	0.911318	0.657048	0	0	0.859574	0.0787214	-3.6671	0.155214	0.693612	0.999816	MMU_CIRCpedia_29422
2:7014453-7030215	0	0.552656	0	0.328524	0	0	0.930761	0.0605002	-4.04692	0.154711	0.694084	0.999816	species_specific
9:33960825-33996333	1.54524	1.10531	1.12162	1.11698	1.11139	1.8679	0.226628	0.236582	-2.07959	0.154508	0.694274	0.999816	species_specific
17:67947725-67948306	0.632143	0	0	0	0.392256	0	0.958987	0.0659076	-3.92341	0.153745	0.694992	0.999816	species_specific
7:131508950-131511433	0.632143	0	0	0	0.392256	0	0.958987	0.0659076	-3.92341	0.153745	0.694992	0.999816	species_specific
19:14458030-14458375	0.561905	0.429844	0	0	0	0.684896	0.828395	0.0815173	-3.61675	0.153718	0.695017	0.999816	MMU_CIRCpedia_31387
2:196220038-196220941	2.95	3.86859	2.38345	4.00799	4.44556	4.17164	-0.114278	0.576593	-0.794374	0.150923	0.697665	0.999816	species_specific
10:92483254-92508890	0	0	0.420608	0	0.261504	0	0.891432	0.05664	-4.14203	0.15002	0.698526	0.999816	species_specific
13:72773683-72777493	0	0	0.420608	0	0.261504	0	0.891432	0.05664	-4.14203	0.15002	0.698526	0.999816	species_specific
7:105073618-105081797	0	0	0.420608	0	0.261504	0	0.891432	0.05664	-4.14203	0.15002	0.698526	0.999816	species_specific
2:210153494-210154611	0.632143	0.9825	0.280406	0.525638	0.32688	0.809422	0.508241	0.127747	-2.96864	0.149943	0.698599	0.999816	MMU_CIRCpedia_26654
15:63696123-63716473	3.44167	2.51766	2.17314	2.43108	4.70707	4.04711	-0.12093	0.520125	-0.943069	0.149888	0.698653	0.999816	species_specific
15:74926765-74929232	0.702381	1.10531	0	1.51121	0.392256	1.12074	-0.387761	0.154912	-2.69047	0.149643	0.698886	0.999816	MMU_CIRCpedia_23853
X:53403565-53403893	1.82619	2.33344	2.80406	1.90544	3.33417	2.73958	0.139837	0.41349	-1.27407	0.149226	0.699286	0.999816	species_specific
19:45263112-45263367	0	0.614062	0	0.459934	0	0.871686	-0.785838	0.0847624	-3.56043	0.149063	0.699442	0.999816	species_specific
7:92294888-92307656	0.421429	0.49125	0	0.919867	0.457631	0.435843	-0.622972	0.104458	-3.259	0.14878	0.699714	0.999816	species_specific
15:41085368-41087682	1.12381	0.368437	0	1.05128	0	0.249053	0.589295	0.109197	-3.19499	0.148528	0.699956	0.999816	species_specific
11:128758114-128782023	2.3881	1.28953	0.771115	2.29967	2.35353	1.74337	-0.17238	0.307882	-1.69955	0.146128	0.702273	0.999816	MMU_CIRCpedia_40781
12:32305696-32306122	0	0	0.49071	0.328524	0	0	0.906418	0.0596678	-4.0669	0.145616	0.70277	0.999816	species_specific
7:100819556-100820296	0	0	0.630913	0	0.392256	0	0.931145	0.0656186	-3.92975	0.145494	0.702889	0.999816	species_specific
3:47083719-47098081	0	0.675469	0	0	0.32688	1.05848	-0.742866	0.0881922	-3.50321	0.144762	0.703602	0.999816	species_specific
7:23185069-23187146	0.913095	0.859687	0	1.70832	0.653759	0.622633	-0.385979	0.153956	-2.69941	0.1447	0.703662	0.999816	species_specific
6:7181123-7189322	0.491667	0	0	0.657048	0	0.560369	-0.821682	0.0800834	-3.64235	0.144165	0.704185	0.999816	species_specific
12:124419956-124430787	0.842857	1.35094	1.12162	0.657048	0.980639	1.8679	0.250187	0.209305	-2.25632	0.144108	0.70424	0.999816	species_specific
19:33113766-33114419	0.421429	0.675469	0	0.459934	0.32688	0	0.756283	0.0861386	-3.5372	0.14394	0.704405	0.999816	species_specific
2:200856681-200861862	0	0.429844	0.420608	0	0	0.560369	0.857478	0.0744965	-3.74668	0.14375	0.70459	0.999816	species_specific
12:6548424-6548825	0.842857	2.27203	1.26183	2.16826	1.37289	1.30753	0.192972	0.26625	-1.90914	0.143557	0.704779	0.999816	species_specific
1:243545509-243573048	0	0.9825	0.420608	1.05128	0.784511	0.622633	-0.481968	0.131549	-2.92633	0.142917	0.705408	0.999816	MMU_CIRCpedia_12071
22:23292540-23295155	0	0	0.49071	0	0.588383	0.560369	-0.8239	0.0793137	-3.65629	0.142596	0.705724	0.999816	species_specific
12:104325336-104327671	0.35119	0.429844	0.49071	0	0.915263	1.36979	-0.505768	0.126465	-2.98319	0.142528	0.70579	0.999816	species_specific
4:147879231-147881932	1.05357	0.9825	0.98142	0.788458	1.24214	1.12074	0.274163	0.194249	-2.36402	0.142507	0.705811	0.999816	species_specific
7:66991136-66994341	0.491667	0	0	0.328524	0	0.871686	-0.814198	0.0799524	-3.64471	0.141305	0.706996	0.999816	species_specific
8:67093542-67095732	0.280952	0	0	0	0.719135	0	-0.919819	0.063857	-3.96901	0.140945	0.707353	0.999816	species_specific
12:71642435-71644318	0.842857	1.22812	0	0.328524	0.849887	0.684896	0.449487	0.137423	-2.8633	0.140826	0.707471	0.999816	species_specific
20:36829053-36839441	1.05357	0.307031	0	0.328524	0.784511	0	0.61748	0.102642	-3.28431	0.140603	0.707692	0.999816	MMU_CIRCpedia_10788
14:58318541-58323617	0.561905	0	0	0	0	0.37358	0.910867	0.0631807	-3.98437	0.14042	0.707874	0.999816	MMU_CIRCpedia_27687
19:47362475-47362693	0	0.859687	0.560811	0.525638	0	0.622633	0.611855	0.102447	-3.28705	0.139567	0.708721	0.999816	species_specific
17:51263273-51268904	0.491667	0.245625	0.420608	0.262819	0.261504	0.37358	0.701891	0.0914349	-3.45111	0.139096	0.709191	0.999816	species_specific
10:126970701-127000307	1.68571	2.02641	2.38345	2.6939	2.22278	3.61127	-0.137982	0.399531	-1.32362	0.138341	0.709945	0.999816	species_specific
10:21882281-21920963	0.632143	0	0.420608	0.394229	0	0.435843	0.733795	0.0871674	-3.52007	0.137422	0.710867	0.999816	MMU_CIRCpedia_12462
11:107390073-107392895	0.842857	2.08781	0.98142	1.3798	1.43827	2.80185	-0.186024	0.271266	-1.88222	0.137346	0.710944	0.999816	species_specific
3:170145422-170149244	0	0.49125	0	0	0.32688	0.747159	-0.825004	0.0764469	-3.7094	0.136489	0.711805	0.999816	species_specific
13:40940920-40943925	0	0.614062	0	0	0.457631	0.809422	-0.757697	0.0840693	-3.57228	0.135995	0.712305	0.999816	species_specific
1:155926675-155927156	0.421429	0	0	0.657048	0.392256	0	-0.841569	0.0745958	-3.74476	0.135604	0.7127	0.999816	MMU_CIRCpedia_39787
15:62007307-62013992	0.632143	0.675469	0	0.985572	0.915263	0.435843	-0.488404	0.127407	-2.97249	0.135569	0.712735	0.999816	species_specific
1:109230877-109231786	0	0	0.701014	0	0.457631	0	0.875936	0.0691456	-3.85422	0.135063	0.713249	0.999816	species_specific
7:90747680-90790652	0	0.859687	0.630913	0.919867	0.588383	1.05848	-0.445779	0.136658	-2.87136	0.134984	0.713329	0.999816	MMU_CIRCpedia_22243
16:75411824-75414695	0.421429	0.49125	1.12162	1.05128	0.784511	1.43205	-0.323573	0.169142	-2.5637	0.134548	0.713771	0.999816	MMU_CIRCpedia_3254
19:12928341-12928847	3.23095	2.88609	1.82264	2.29967	3.13804	3.79806	0.122008	0.468077	-1.09518	0.13443	0.713891	0.999816	MMU_CIRCpedia_31839
1:235465635-235470960	0	0.921094	0.49071	0.328524	0	0.809422	0.601323	0.101981	-3.29363	0.13354	0.714798	0.999816	species_specific
5:132892163-132897240	0	1.16672	0	0.854162	0	0	0.709239	0.0877887	-3.50982	0.133288	0.715056	0.999816	MMU_CIRCpedia_38368
10:101667885-101676436	0.561905	0	0	0.394229	0	0	0.887376	0.0633326	-3.98091	0.133212	0.715134	0.999816	MMU_CIRCpedia_20623
3:40189825-40190463	0.561905	0	0	0.394229	0	0	0.887376	0.0633326	-3.98091	0.133212	0.715134	0.999816	MMU_CIRCpedia_5116
6:52267864-52269226	3.65238	2.88609	1.61233	4.86216	2.74579	3.67353	-0.113978	0.517464	-0.95047	0.133011	0.71534	0.999816	species_specific
12:101383040-101383669	0	0	0.560811	0	0	0.37358	0.883621	0.0629286	-3.99014	0.132598	0.715763	0.999816	species_specific
4:88065373-88065879	0	0	0.560811	0	0	0.37358	0.883621	0.0629286	-3.99014	0.132598	0.715763	0.999816	species_specific
12:111658735-111659345	1.26429	0.429844	0.420608	0.788458	1.43827	1.12074	-0.306918	0.174757	-2.51658	0.132361	0.716006	0.999816	species_specific
2:24270670-24275849	0	0.614062	0.701014	0	0.588383	0.435843	0.626692	0.0982054	-3.34805	0.130914	0.717496	0.999816	species_specific
17:20204332-20205912	0	0.429844	0.701014	1.11698	0.719135	0.249053	-0.520841	0.116771	-3.09825	0.130601	0.717819	0.999816	MMU_CIRCpedia_25180
8:17675185-17684542	0	0.614062	0	0	0	0.37358	0.865808	0.0633814	-3.9798	0.130235	0.718198	0.999816	MMU_CIRCpedia_40187
3:179413411-179419505	0	0	1.26183	0	0.588383	0.435843	0.629133	0.0981007	-3.34959	0.130136	0.7183	0.999816	species_specific
3:195878252-195888606	0.632143	0	0	0	0	0.435843	0.87609	0.0666061	-3.9082	0.129428	0.719035	0.999816	species_specific
8:102360070-102361626	0.842857	0	0.911318	0.788458	1.43827	0.684896	-0.361271	0.155647	-2.68365	0.129282	0.719187	0.999816	MMU_CIRCpedia_18762
2:48498492-48511468	0	0.368437	0.280406	0.591343	0.457631	0.311316	-0.712246	0.0871877	-3.51973	0.12919	0.719283	0.999816	species_specific
3:183070998-183071357	0.280952	0	0.771115	0.459934	0	1.55658	-0.529202	0.113973	-3.13324	0.128567	0.719932	0.999816	species_specific
5:139363758-139364743	1.54524	0.798281	1.75253	1.77403	1.56902	1.24527	0.190294	0.257935	-1.95492	0.128436	0.720068	0.999816	MMU_CIRCpedia_17804
12:1263033-1290012	0.772619	0	0	0	0	0.560369	0.822713	0.0734664	-3.76677	0.128368	0.720139	0.999816	MMU_CIRCpedia_4840
13:112516439-112527484	0	0.49125	0	0.657048	0	0.435843	-0.801674	0.0760758	-3.71642	0.128329	0.72018	0.999816	MMU_CIRCpedia_38002
X:73577406-73584572	0.280952	0.307031	0	0.394229	0	0	0.864676	0.0634326	-3.97863	0.128131	0.720387	0.999816	MMU_CIRCpedia_217305
9:33971650-33996333	0.842857	0	0	0.262819	0	0.37358	0.792308	0.0770058	-3.69889	0.127223	0.721338	0.999816	species_specific
4:53414614-53428183	0	0	0.911318	0.722753	1.04601	0	-0.573965	0.105084	-3.25039	0.126964	0.72161	0.999816	MMU_CIRCpedia_37274
16:70261043-70262524	0.842857	2.14922	3.57517	4.0737	2.02665	1.55658	0.133302	0.391757	-1.35197	0.126002	0.722622	0.999816	MMU_CIRCpedia_3058
13:100257594-100273346	1.26429	1.41234	1.19172	1.77403	1.6344	0.871686	0.199266	0.242484	-2.04404	0.125831	0.722804	0.999816	MMU_CIRCpedia_5854
3:52204692-52206751	0	0	0.560811	0.394229	0	0	0.860125	0.0630802	-3.98667	0.12559	0.723058	0.999816	species_specific
9:70277309-70286271	0.491667	0	0	0	0.32688	0	0.848631	0.0603685	-4.05006	0.125446	0.723211	0.999816	species_specific
2:214780559-214797117	0	0.307031	0.280406	0.394229	0	0	0.851109	0.0633072	-3.98149	0.124393	0.724327	0.999816	MMU_CIRCpedia_27711
3:173800292-173807832	0	0.614062	0	0.394229	0	0	0.842394	0.0635311	-3.97639	0.123264	0.72553	0.999816	MMU_CIRCpedia_14668
14:34575755-34609742	0.280952	0	0	0.459934	0.261504	0	-0.85538	0.0631755	-3.98449	0.122955	0.72586	0.999816	species_specific
9:122148111-122152408	0.632143	0	0	0.459934	0	0	0.851664	0.0667853	-3.90433	0.122719	0.726113	0.999816	species_specific
20:48690946-48692790	0.983333	0.49125	0.350507	0	1.6344	0	0.457985	0.128326	-2.96212	0.121424	0.727504	0.999816	species_specific
3:125277725-125331238	0.280952	0	0.280406	0.657048	0	0.622633	-0.725181	0.0833493	-3.58469	0.121151	0.727798	0.999816	MMU_CIRCpedia_16909
3:172251259-172298787	0.772619	0.49125	0	0.722753	0	1.55658	-0.470496	0.124684	-3.00366	0.120801	0.728176	0.999816	species_specific
12:118181370-118181607	0	0.614062	0.49071	0.262819	0.653759	1.05848	-0.511925	0.11369	-3.13682	0.120761	0.728219	0.999816	species_specific
19:56413958-56414440	0.702381	0	0	0.657048	0.457631	0.37358	-0.646665	0.0926426	-3.43218	0.119601	0.729477	0.999816	species_specific
1:92605306-92636336	0	0.49125	0	0	0	0.311316	0.800729	0.0587969	-4.08812	0.119523	0.729561	0.999816	MMU_CIRCpedia_2181
8:17649845-17656065	0.561905	0	0	0.788458	0	0.498106	-0.715966	0.0835394	-3.5814	0.118631	0.730533	0.999816	species_specific
11:85996825-86003451	0	0.245625	0	0	0	0.560369	-0.802279	0.0581959	-4.10294	0.117835	0.731403	0.999816	species_specific
3:121496807-121498670	0	0.245625	0	0	0	0.560369	-0.802279	0.0581959	-4.10294	0.117835	0.731403	0.999816	species_specific
3:57242855-57248351	0	0.245625	0	0	0	0.560369	-0.802279	0.0581959	-4.10294	0.117835	0.731403	0.999816	species_specific
2:159149141-159150556	0	0.49125	0.630913	0	0	0.871686	0.659724	0.0890495	-3.48925	0.117538	0.731729	0.999816	MMU_CIRCpedia_24634
17:51201591-51203228	0	0.368437	1.12162	1.11698	0.392256	1.05848	-0.41238	0.137604	-2.86141	0.117008	0.732311	0.999816	MMU_CIRCpedia_34653
16:22349278-22349849	0.913095	0	1.12162	0.854162	0	1.183	0.392381	0.142334	-2.81264	0.116857	0.732477	0.999816	species_specific
17:37584647-37585430	0.491667	0.245625	0.420608	1.24839	0.32688	0.560369	-0.484487	0.11887	-3.07254	0.116593	0.732768	0.999816	species_specific
18:12999420-13030608	0	0.552656	0	0	0.261504	0.871686	-0.738278	0.079301	-3.65652	0.116389	0.732993	0.999816	species_specific
13:114040999-114073837	0.35119	0	0	0.328524	0.523007	0	-0.82008	0.0684529	-3.86875	0.116111	0.7333	0.999816	species_specific
16:89224718-89225631	1.19405	1.04391	1.12162	1.51121	1.56902	1.80563	-0.191946	0.242592	-2.0434	0.116058	0.733358	0.999816	species_specific
17:42727634-42730918	0	0	0.280406	0.394229	0	0.311316	-0.827863	0.0625379	-3.99912	0.115962	0.733464	0.999816	species_specific
8:134600435-134610655	0.491667	0	0	0.591343	0	0.560369	-0.74532	0.0786356	-3.66867	0.115782	0.733663	0.999816	species_specific
3:179730188-179730709	0	1.16672	0.280406	0.525638	0.653759	0	0.54642	0.103814	-3.26793	0.115425	0.734058	0.999816	species_specific
9:131430089-131432794	0	0.368437	0.49071	0.788458	0.849887	0	-0.58197	0.0995659	-3.3282	0.115345	0.734147	0.999816	MMU_CIRCpedia_16403
18:36026899-36033837	0.772619	0.736875	0.98142	1.18269	0.523007	0.871686	0.307121	0.165763	-2.5928	0.115286	0.734213	0.999816	MMU_CIRCpedia_14140
7:105481051-105508544	0.280952	0	0.49071	0.985572	0.588383	0	-0.605823	0.0962112	-3.37765	0.113902	0.735753	0.999816	species_specific
12:19462509-19473355	0.632143	0	0.911318	0.985572	0.784511	0.871686	-0.387431	0.142598	-2.80997	0.113793	0.735875	0.999816	MMU_CIRCpedia_39553
5:71502598-71512428	0.421429	0	0	0	0.653759	0.311316	-0.773851	0.0734137	-3.76781	0.112379	0.737461	0.999816	species_specific
2:206279539-206297373	0	0	0.49071	0	0.523007	0.560369	-0.74033	0.0777616	-3.6848	0.11206	0.737819	0.999816	MMU_CIRCpedia_226709
1:88740987-88760376	0	0	0.350507	0	0	0.249053	0.749383	0.0542324	-4.2047	0.111031	0.738982	0.999816	MMU_CIRCpedia_9258
2:17738220-17745951	0	0	0.350507	0	0	0.249053	0.749383	0.0542324	-4.2047	0.111031	0.738982	0.999816	MMU_CIRCpedia_228302
14:22906194-22909595	0.561905	0.675469	0	0.525638	0	0.498106	0.598255	0.0951704	-3.39334	0.110623	0.739444	0.999816	species_specific
2:160286968-160300730	0	0.552656	0	0.394229	0	0.747159	-0.717619	0.0789503	-3.66291	0.109402	0.740834	0.999816	species_specific
10:31461036-31461237	0	2.45625	1.33193	1.57692	1.6344	0.933949	0.191339	0.233384	-2.09922	0.109361	0.740881	0.999816	MMU_CIRCpedia_23736
4:88061905-88065879	0	0.675469	0.771115	0	0.784511	0.435843	0.516861	0.10641	-3.2323	0.108523	0.741841	0.999816	species_specific
17:37440504-37440662	0	0.245625	0	0	0.523007	0	-0.769668	0.0577185	-4.11482	0.108459	0.741913	0.999816	species_specific
20:37056145-37065473	0	0.245625	0	0	0.523007	0	-0.769668	0.0577185	-4.11482	0.108459	0.741913	0.999816	species_specific
5:140440118-140445975	0	0.736875	0.350507	0.591343	0.457631	0.871686	-0.493108	0.111239	-3.16827	0.108007	0.742433	0.999816	MMU_CIRCpedia_18141
1:224952669-224974153	0	1.04391	0.630913	1.11698	0.392256	0	0.466208	0.117241	-3.09245	0.107693	0.742794	0.999816	species_specific
2:135862606-135865163	0	0.429844	0	0.525638	0.392256	0	-0.770531	0.0709606	-3.81684	0.107484	0.743035	0.999816	species_specific
9:109050282-109064567	0.632143	0	0	0.657048	0.261504	0.435843	-0.647825	0.0874144	-3.51598	0.106978	0.743619	0.999816	MMU_CIRCpedia_23672
15:101235081-101235577	0.702381	0	0	1.11698	0	0.37358	-0.613746	0.0919105	-3.44363	0.106431	0.744252	0.999816	MMU_CIRCpedia_26447
5:154790324-154792796	0	0.429844	0	0.591343	0.32688	0	-0.76315	0.0708618	-3.81885	0.105368	0.745488	0.999816	MMU_CIRCpedia_212388
19:2213538-2214596	0.421429	0.245625	0	1.05128	0.32688	0	-0.635785	0.0880649	-3.50529	0.105055	0.745853	0.999816	species_specific
3:138570317-138572932	0.772619	0	0	0	0.653759	0.871686	-0.579162	0.0961891	-3.37798	0.104146	0.746917	0.999816	species_specific
7:128335542-128336042	0	0.675469	0	0.459934	0	0	0.773287	0.0665577	-3.90925	0.103422	0.747769	0.999816	species_specific
22:37687909-37688992	0.491667	0.245625	0.911318	0	0.588383	0.933949	0.450147	0.120072	-3.05803	0.103149	0.748091	0.999816	species_specific
22:50125391-50128507	0.491667	1.16672	0.280406	0.919867	0.653759	0.249053	0.40318	0.132103	-2.92026	0.102267	0.749134	0.999816	species_specific
3:8935870-8941804	0	0.368437	0	0	0	0.249053	0.703335	0.0542029	-4.20549	0.101891	0.74958	0.999816	species_specific
5:61472680-61473037	0	0.368437	0	0	0	0.249053	0.703335	0.0542029	-4.20549	0.101891	0.74958	0.999816	MMU_CIRCpedia_2179
14:31127784-31133675	0	0.736875	0	0.854162	0	0.560369	-0.612473	0.0894565	-3.48267	0.101883	0.74959	0.999816	species_specific
20:36687491-36688784	0	0	0.560811	0	0.392256	0	0.770985	0.0636681	-3.97329	0.100761	0.750926	0.999816	species_specific
15:40744046-40745259	0	1.84219	0.911318	1.64262	1.50365	0.871686	-0.217559	0.20263	-2.30308	0.100516	0.751219	0.999816	species_specific
8:60572045-60591969	0	0.675469	0.350507	0.722753	0.653759	0.435843	-0.494413	0.107318	-3.22003	0.100441	0.751309	0.999816	MMU_CIRCpedia_32131
15:90448572-90456315	0	0	0.350507	0.459934	0	0.37358	-0.765818	0.0673506	-3.89217	0.100129	0.751682	0.999816	species_specific
12:68816811-68824651	0	0.552656	0.560811	1.24839	0	0.747159	-0.467016	0.113147	-3.14373	0.0999294	0.751922	0.999816	species_specific
5:94909250-94924021	1.05357	0.9825	0.49071	0.854162	0.784511	0.996212	0.279583	0.168062	-2.57293	0.099771	0.752112	0.999816	MMU_CIRCpedia_217756
4:74174505-74201370	0	0.921094	0	0.459934	0.784511	0.37358	-0.536391	0.0997734	-3.3252	0.0995506	0.752377	0.999816	MMU_CIRCpedia_33886
2:43912431-43918398	0	0.368437	0	0.394229	0.392256	0	-0.768536	0.0664947	-3.91062	0.0994883	0.752452	0.999816	MMU_CIRCpedia_31759
5:139121034-139127853	0	0.368437	0	0	0.457631	0.311316	-0.766224	0.0664662	-3.91123	0.0988479	0.753224	0.999816	MMU_CIRCpedia_17719
9:2837179-2838517	0.35119	0	0	0.854162	0	0	-0.754789	0.067663	-3.88549	0.0977142	0.754598	0.999816	MMU_CIRCpedia_39307
13:42159265-42160136	0.702381	0	0.701014	0.788458	0.523007	0	0.483501	0.108339	-3.20638	0.097583	0.754757	0.999816	species_specific
2:208345110-208348023	0.280952	0.245625	0	0	0	0.37358	0.750057	0.0616916	-4.01878	0.0970418	0.755417	0.999816	species_specific
2:159001079-159097834	0.280952	0.859687	0	0	0.392256	0.498106	0.593048	0.0896846	-3.479	0.0970178	0.755446	0.999816	MMU_CIRCpedia_24597
8:67076481-67095732	0	0	0.420608	0	0	0.311316	0.72239	0.0576088	-4.11757	0.096896	0.755594	0.999816	species_specific
16:89510489-89513037	0.702381	0.552656	0.49071	0.591343	0.261504	0.809422	0.420236	0.124543	-3.00528	0.0968833	0.75561	0.999816	species_specific
1:50655441-50744775	0.421429	0	0	0.328524	0	0	0.725814	0.0579153	-4.10991	0.0968374	0.755666	0.999816	MMU_CIRCpedia_2647
12:5981785-5985665	0.421429	0	0	0.328524	0	0	0.725814	0.0579153	-4.10991	0.0968374	0.755666	0.999816	NA
16:23079945-23082557	0.421429	0	0	0.328524	0	0	0.725814	0.0579153	-4.10991	0.0968374	0.755666	0.999816	species_specific
6:7899575-7904723	0.421429	0	0	0.328524	0	0	0.725814	0.0579153	-4.10991	0.0968374	0.755666	0.999816	species_specific
7:2213211-2222754	0.421429	0	0	0.328524	0	0	0.725814	0.0579153	-4.10991	0.0968374	0.755666	0.999816	species_specific
3:3167633-3175269	0	0	0.280406	0.394229	0.261504	0	-0.754002	0.0615904	-4.02115	0.0965715	0.755991	0.999816	MMU_CIRCpedia_1847
4:911672-913668	0.491667	0	0.630913	0.657048	0.32688	0	0.576861	0.0927019	-3.43126	0.09627	0.75636	0.999816	MMU_CIRCpedia_2442
20:32366383-32369123	6.53214	6.20203	5.81842	6.17625	9.34876	9.09043	-0.0675417	1.11231	0.15356	0.0961086	0.756558	0.999816	MMU_CIRCpedia_10455
6:143772257-143783280	0	0	0.350507	0	0	0.809422	-0.750801	0.0671731	-3.89597	0.0960828	0.75659	0.999816	species_specific
13:111205288-111217880	0	0.368437	0	0.262819	0	0	0.68294	0.0542995	-4.20292	0.0960056	0.756684	0.999816	MMU_CIRCpedia_4361
4:3316069-3343053	0	0.368437	0	0.262819	0	0	0.68294	0.0542995	-4.20292	0.0960056	0.756684	0.999816	species_specific
8:132610165-132625454	0	0.368437	0	0.262819	0	0	0.68294	0.0542995	-4.20292	0.0960056	0.756684	0.999816	species_specific
8:68027221-68038292	0	0.368437	0	0.262819	0	0	0.68294	0.0542995	-4.20292	0.0960056	0.756684	0.999816	species_specific
1:93894613-93897898	0	0	0.420608	0.394229	0	0.560369	-0.719049	0.0721126	-3.79361	0.0953403	0.757502	0.999816	species_specific
7:158869854-158876691	1.26429	0	1.05152	0.722753	0.849887	0.871686	0.294457	0.160786	-2.63678	0.0953347	0.757509	0.999816	species_specific
2:121757239-121761524	0	0.736875	0	0.525638	0	0	0.71897	0.0695805	-3.84517	0.0941927	0.758921	0.999816	MMU_CIRCpedia_4470
7:111977131-111989163	0.632143	0.736875	0.701014	0.985572	1.43827	0.747159	-0.272376	0.168169	-2.57201	0.0938813	0.759307	0.999816	MMU_CIRCpedia_19399
5:69174876-69175537	0.561905	0	0.280406	0	0.653759	0	0.672816	0.0780519	-3.67942	0.093803	0.759405	0.999816	species_specific
1:186893010-186911389	0	0	0.560811	0.657048	0.523007	0	-0.651847	0.0813991	-3.61884	0.0937144	0.759515	0.999816	species_specific
17:75242335-75243570	1.40476	0.429844	0	0.985572	0.457631	1.49432	-0.301419	0.156414	-2.67656	0.0925141	0.761013	0.999816	species_specific
19:17156908-17159484	0.491667	0	0	0	0	0.37358	0.73029	0.0612066	-4.03017	0.0916036	0.762156	0.999816	species_specific
7:30621392-30622462	0	0	0.49071	0	0.653759	0.37358	-0.676622	0.0765902	-3.7067	0.0914582	0.762339	0.999816	species_specific
X:53561755-53562929	1.475	0.245625	0	0.985572	1.11139	0.684896	-0.316838	0.150914	-2.7282	0.0908465	0.763111	0.999816	species_specific
1:28987430-28997319	0	0.307031	0	0	0.261504	0.37358	-0.725377	0.0616772	-4.01912	0.0896583	0.764619	0.999816	MMU_CIRCpedia_7759
20:51432066-51435761	0	0.49125	0	0	0.32688	0	0.694119	0.0593957	-4.0735	0.0889198	0.765562	0.999816	MMU_CIRCpedia_11729
7:26844029-26854890	0.421429	0	0	0.328524	0	0.622633	-0.692902	0.0722834	-3.79019	0.0888789	0.765615	0.999816	MMU_CIRCpedia_22251
12:116096668-116111512	1.61548	0.429844	0	0.328524	1.04601	0.684896	0.335089	0.14385	-2.79737	0.0881682	0.766526	0.999816	MMU_CIRCpedia_4573
1:46077514-46080750	0.632143	0.49125	0	0.985572	0	0	0.556641	0.0911872	-3.45502	0.0877555	0.767058	0.999816	MMU_CIRCpedia_229561
2:200942684-200958133	0	0.49125	0.420608	0	0.849887	0.747159	-0.499046	0.100436	-3.31566	0.0871498	0.76784	0.999816	species_specific
15:93000511-93014909	0.280952	0.552656	1.12162	1.3141	1.69977	0	-0.277804	0.161748	-2.62818	0.0867255	0.768389	0.999816	species_specific
3:196487398-196488683	6.18095	8.04422	4.20608	7.95028	5.81846	8.59233	0.0655632	1.04629	0.0652776	0.0866703	0.768461	0.999816	species_specific
1:245017241-245083688	0	0.368437	0	0.788458	0	0	-0.716534	0.0659108	-3.92334	0.0866703	0.768461	0.999816	MMU_CIRCpedia_12160
2:47795893-47796063	0	0.368437	0	0.788458	0	0	-0.716534	0.0659108	-3.92334	0.0866703	0.768461	0.999816	species_specific
14:60796216-60879835	0.280952	0.368437	0	0	0.849887	0.37358	-0.598201	0.0850345	-3.55581	0.0866368	0.768504	0.999816	MMU_CIRCpedia_28313
12:69589484-69592159	0	0.368437	0.420608	0	0.392256	1.05848	-0.540699	0.0935403	-3.41827	0.0863168	0.76892	0.999816	species_specific
18:21006350-21008194	0.632143	1.22812	0.771115	1.77403	0.980639	1.12074	-0.208283	0.197438	-2.34053	0.0858864	0.769481	0.999816	species_specific
7:105038125-105041023	0.702381	0	0.630913	0.394229	0	0.871686	0.468912	0.105104	-3.25011	0.0858584	0.769517	0.999816	MMU_CIRCpedia_13869
9:6420911-6434173	0	0	0.841217	0.788458	0.784511	0	-0.507766	0.0983526	-3.34589	0.0849057	0.770763	0.999816	MMU_CIRCpedia_15697
1:155318291-155318505	0	0.552656	0	0.328524	0	0.747159	-0.639927	0.0775157	-3.68937	0.0846413	0.771111	0.999816	NA
1:66958058-66963160	1.82619	3.74578	1.75253	3.21954	3.33417	3.36222	-0.0974793	0.461095	-1.11687	0.0844774	0.771326	0.999816	MMU_CIRCpedia_877
12:132780797-132784307	0.913095	0	0	0.525638	0.261504	0	0.609513	0.0825049	-3.59938	0.0843577	0.771484	0.999816	species_specific
18:8244057-8253414	0	0	0.280406	0.262819	0	0.37358	-0.697395	0.0610554	-4.03374	0.0840128	0.771938	0.999816	MMU_CIRCpedia_26656
17:64171099-64188415	0.632143	0.9825	0.630913	0.722753	1.37289	1.24527	-0.239807	0.176401	-2.50307	0.0837753	0.772252	0.999816	species_specific
5:75547009-75552591	0.632143	0	0.701014	0.657048	0	0.622633	0.462448	0.105177	-3.2491	0.0836442	0.772425	0.999816	MMU_CIRCpedia_216376
12:133191488-133192003	0.421429	0.368437	0.420608	0.722753	0	0.37358	0.509935	0.0965364	-3.37278	0.0829305	0.773372	0.999816	species_specific
19:17276494-17276909	0	0.614062	0	0.459934	0.261504	0.435843	-0.609849	0.0810525	-3.625	0.0825168	0.773922	0.999816	MMU_CIRCpedia_220323
12:1104749-1116033	0	0.245625	0	0.262819	0	0.249053	-0.661413	0.0568661	-4.13629	0.0823646	0.774125	0.999816	species_specific
6:144781921-144803147	0	0	0.280406	0	0	0.622633	-0.686771	0.0609559	-4.03609	0.0817334	0.774969	0.999816	MMU_CIRCpedia_6294
11:94445809-94447438	0.772619	0	0.49071	0	0	1.183	0.475606	0.101572	-3.29943	0.0813583	0.775472	0.999816	species_specific
12:26711172-26725765	0.421429	0	0	0	0.523007	0.37358	-0.665837	0.071731	-3.80126	0.0809575	0.776011	0.999816	MMU_CIRCpedia_38215
1:9931890-9935627	0	0	0.771115	0.657048	0.261504	0.560369	-0.522474	0.0938552	-3.41342	0.0807576	0.77628	0.999816	species_specific
8:28155941-28162078	0.842857	0.552656	0	0.459934	0.719135	1.12074	-0.368854	0.129671	-2.94707	0.0807396	0.776305	0.999816	species_specific
15:41668827-41669958	0.913095	1.71937	1.19172	2.10255	1.96128	1.30753	-0.146401	0.264525	-1.91852	0.0805511	0.776559	0.999816	MMU_CIRCpedia_4966
8:140735250-140752316	0	0.368437	0	0	0	0.747159	-0.689335	0.06561	-3.92994	0.0804785	0.776657	0.999816	MMU_CIRCpedia_28338
7:92213194-92226682	0	0.614062	0.630913	0.525638	0.849887	0.684896	-0.398103	0.119549	-3.06433	0.080075	0.777203	0.999816	MMU_CIRCpedia_212056
14:37285317-37369624	3.5119	2.45625	0.911318	2.36537	2.35353	3.42448	0.102254	0.413726	-1.27325	0.0799698	0.777345	0.999816	MMU_CIRCpedia_23809
20:62905886-62914406	0	0	0.49071	0.394229	0	0	0.680199	0.0611393	-4.03176	0.0798081	0.777565	0.999816	MMU_CIRCpedia_12297
10:1072115-1080476	0	0.245625	0	0	0	0.498106	-0.648787	0.0567688	-4.13876	0.0794993	0.777984	0.999816	species_specific
1:215586494-215595471	0.35119	0.307031	0.280406	0.459934	0.523007	0.684896	-0.463471	0.102706	-3.28341	0.0793182	0.77823	0.999816	species_specific
13:41369089-41372830	0	1.35094	0	0	1.17677	0.933949	-0.38536	0.122544	-3.02862	0.0792086	0.77838	0.999816	species_specific
5:65451474-65460338	0	0	0.630913	0	0	0.498106	0.676095	0.0677581	-3.88346	0.0791061	0.778519	0.999816	MMU_CIRCpedia_1178
5:73058432-73077493	0.421429	0	0	0	0.457631	0.435843	-0.656375	0.0716053	-3.80379	0.0785464	0.779284	0.999816	species_specific
4:128077787-128082305	0.35119	1.10531	0	0.854162	0.849887	0.622633	-0.359436	0.130169	-2.94154	0.0778728	0.780208	0.999816	species_specific
5:122336787-122403865	0.491667	0	0	0.459934	0.32688	0.249053	-0.622267	0.0763708	-3.71084	0.0773074	0.780987	0.999816	species_specific
10:1084402-1096246	0	0.429844	0	0	0	0.311316	0.630173	0.0572168	-4.12742	0.0772238	0.781102	0.999816	MMU_CIRCpedia_212253
3:142736378-142748460	0	0.429844	0	0	0	0.311316	0.630173	0.0572168	-4.12742	0.0772238	0.781102	0.999816	MMU_CIRCpedia_224558
X:70341798-70387297	0	0.429844	0	0	0	0.311316	0.630173	0.0572168	-4.12742	0.0772238	0.781102	0.999816	species_specific
17:36581343-36581538	0	0	0.630913	0.722753	0.523007	0	-0.565302	0.0848047	-3.55971	0.0767265	0.78179	0.999816	species_specific
16:77353732-77367723	0	0.429844	0.560811	0.854162	0	0	0.562967	0.0844333	-3.56604	0.0766759	0.781861	0.999816	MMU_CIRCpedia_3587
16:53254437-53274302	0.491667	0.614062	0.420608	1.70832	0	0.809422	-0.33662	0.136252	-2.87565	0.0764788	0.782134	0.999816	MMU_CIRCpedia_33946
14:58318541-58330169	0	0.614062	0.911318	1.11698	0	1.36979	-0.338108	0.135728	-2.88121	0.0764626	0.782156	0.999816	MMU_CIRCpedia_27688
7:103319755-103322632	0.280952	0	0	0	0	0.622633	-0.664072	0.0610792	-4.03317	0.0763144	0.782362	0.999816	species_specific
15:57461679-57461892	0.772619	1.65797	0.630913	1.24839	1.17677	1.93016	-0.171697	0.219829	-2.18554	0.0761735	0.782558	0.999816	species_specific
15:83151214-83158041	0	0.552656	0.701014	0	0.653759	0.435843	0.477072	0.0981703	-3.34857	0.0760031	0.782796	0.999816	MMU_CIRCpedia_30958
16:57521067-57526127	1.12381	1.59656	0.420608	1.24839	1.04601	1.183	0.188517	0.202741	-2.30229	0.0759613	0.782854	0.999816	species_specific
7:102397619-102407498	0	0.368437	0	0	0.261504	0	0.60538	0.0546729	-4.19303	0.0753326	0.783732	0.999816	species_specific
12:66203710-66228370	0	0.552656	0	0	0.457631	0.560369	-0.608566	0.0768579	-3.70166	0.0752875	0.783795	0.999816	species_specific
5:176975395-176982623	0	0.859687	0.911318	1.90544	0.32688	0.560369	-0.293244	0.148639	-2.75012	0.0752665	0.783824	0.999816	MMU_CIRCpedia_23077
1:179120189-179121867	0.421429	0.429844	0	0.394229	0.261504	0.871686	-0.483186	0.0966379	-3.37127	0.0742639	0.785234	0.999816	species_specific
17:56844018-56848065	0	0.614062	0.420608	0	0.588383	0.249053	0.541856	0.0860998	-3.53785	0.0742615	0.785237	0.999816	species_specific
2:120278617-120289757	0.491667	0	1.12162	0.262819	1.30752	0	0.378789	0.121312	-3.0432	0.07389	0.785762	0.999816	MMU_CIRCpedia_224075
17:5331948-5332152	0	0	0.630913	0.525638	0	0	0.651025	0.0679631	-3.8791	0.0736054	0.786165	0.999816	species_specific
10:72562894-72566794	1.33452	0.429844	0.49071	0.854162	1.56902	0.933949	-0.219821	0.179121	-2.481	0.0729285	0.787126	0.999816	MMU_CIRCpedia_24618
1:28742402-28743986	0.421429	0.614062	0	0.262819	0	0.622633	0.530972	0.0866648	-3.52841	0.0723619	0.787935	0.999816	MMU_CIRCpedia_7780
10:7797046-7802854	0	0.429844	0.350507	0.394229	0.980639	0	-0.505462	0.0916785	-3.44727	0.0723039	0.788018	0.999816	species_specific
7:156826604-156836885	0.421429	0.368437	0	0	0.719135	0.684896	-0.49697	0.0929962	-3.42668	0.0719862	0.788473	0.999816	MMU_CIRCpedia_15434
1:21747066-21757783	0	0.429844	0	0.328524	0	0	0.608076	0.057339	-4.12434	0.0718253	0.788704	0.999816	species_specific
14:61721508-61721823	0	0.429844	0	0.328524	0	0	0.608076	0.057339	-4.12434	0.0718253	0.788704	0.999816	species_specific
12:78049992-78059115	0	0	0.420608	0.525638	0	0.37358	-0.629179	0.0707377	-3.82138	0.0715636	0.78908	0.999816	MMU_CIRCpedia_2661
17:47663088-47668410	0	0	0.420608	0.525638	0	0.37358	-0.629179	0.0707377	-3.82138	0.0715636	0.78908	0.999816	species_specific
X:37386598-37426000	0.983333	1.28953	0.560811	1.18269	1.43827	1.43205	-0.176801	0.208143	-2.26435	0.0705378	0.790562	0.999816	species_specific
2:169555123-169557297	0.421429	0.552656	0	0	0.784511	0	0.544733	0.0836877	-3.57884	0.0704438	0.790698	0.999816	species_specific
15:29761138-29773357	0.772619	2.88609	0.98142	2.23396	1.83053	2.30374	-0.11908	0.306071	-1.70806	0.0703658	0.790811	0.999816	MMU_CIRCpedia_26165
5:112985834-113004077	0	0.368437	0.420608	0.657048	0	0	0.597127	0.074596	-3.74476	0.070178	0.791084	0.999816	species_specific
3:180947864-180949343	0	0	0.420608	0	0.32688	0	0.616322	0.0582117	-4.10255	0.0697153	0.791758	0.999816	MMU_CIRCpedia_227353
1:225987895-225988388	0	0.49125	0.560811	0	0.392256	0.498106	0.513729	0.0878742	-3.50842	0.0694808	0.792101	0.999816	species_specific
9:96458378-96465778	1.475	3.13172	2.38345	3.21954	2.28816	2.80185	0.0944433	0.416439	-1.26382	0.0693875	0.792237	0.999816	MMU_CIRCpedia_25790
2:32473111-32477583	0	0	0.49071	0	0	0.996212	-0.59218	0.0753212	-3.7308	0.0691156	0.792635	0.999816	MMU_CIRCpedia_28805
2:196271192-196308085	0	0.49125	0.420608	1.05128	0	0.560369	-0.448703	0.0991473	-3.33428	0.0685597	0.793452	0.999816	MMU_CIRCpedia_22765
22:50372019-50394135	0.491667	1.78078	0.771115	1.44551	1.8959	0	0.185255	0.196848	-2.34484	0.0682571	0.793898	0.999816	species_specific
1:156317165-156317547	0.35119	0	0	0.394229	0	0.37358	-0.632153	0.0660547	-3.92019	0.0673687	0.795214	0.999816	species_specific
21:46643534-46644488	0.491667	0	0	0.262819	0.719135	0	-0.583638	0.0756268	-3.72496	0.0670545	0.795681	0.999816	MMU_CIRCpedia_29280
7:158879683-158891333	0	0.429844	0.560811	0	0.457631	0.37358	0.521939	0.084996	-3.55646	0.0668418	0.795998	0.999816	species_specific
6:107921796-107929514	0	0.368437	0.49071	0	0.849887	0.622633	-0.459673	0.0964177	-3.37456	0.0666369	0.796304	0.999816	MMU_CIRCpedia_19916
11:112078214-112080558	0	0.245625	0	0	0.457631	0	-0.594066	0.0561656	-4.15417	0.0663967	0.796664	0.999816	species_specific
7:22193366-22219991	0.561905	0	0	0	0.653759	0.435843	-0.551449	0.08024	-3.63953	0.0657329	0.79766	0.999816	MMU_CIRCpedia_217503
8:38114191-38135766	0.280952	0.9825	0	0	0	1.12074	0.443412	0.0976923	-3.35561	0.0656148	0.797838	0.999816	species_specific
21:39274373-39277351	0.491667	0	0	0	0.719135	0.249053	-0.576616	0.0755225	-3.72695	0.0653744	0.798201	0.999816	species_specific
4:1900625-1930770	0	0.368437	0.630913	0.854162	0	0.871686	-0.407653	0.104606	-3.25696	0.0644985	0.799528	0.999816	MMU_CIRCpedia_17010
1:147275353-147285487	0.491667	1.59656	0	0.525638	1.50365	0.996212	-0.233456	0.163349	-2.61397	0.0639642	0.800343	0.999816	species_specific
14:22926132-22927660	0	0.675469	0.49071	0	1.04601	0.809422	-0.371983	0.113157	-3.14361	0.0633634	0.801263	0.999816	species_specific
5:176350612-176355749	0	0.429844	0.420608	0	0.261504	0.435843	0.547769	0.0778561	-3.68305	0.0629694	0.801869	0.999816	species_specific
5:168568645-168568998	0.702381	1.47375	0.420608	1.3141	0.980639	1.43205	-0.183196	0.19278	-2.37498	0.0626335	0.802387	0.999816	MMU_CIRCpedia_17859
5:133091192-133092789	1.12381	0.614062	1.19172	0.722753	1.43827	1.12074	0.17962	0.196054	-2.35068	0.0622343	0.803005	0.999816	species_specific
5:94868332-94924021	0.491667	0	0	0.459934	0.523007	0	-0.562888	0.0753234	-3.73076	0.0621689	0.803106	0.999816	species_specific
13:41811224-41819386	0.421429	0	0.280406	0.459934	0	0.871686	-0.48378	0.0886658	-3.49548	0.0620312	0.80332	0.999816	species_specific
2:135748266-135772547	0.491667	0	0.630913	0.525638	0	0.560369	0.450582	0.0948396	-3.39837	0.0615768	0.804027	0.999816	MMU_CIRCpedia_223160
2:23958300-23984831	0	0.245625	0.350507	0	0.457631	0	0.598025	0.0657969	-3.92584	0.0609953	0.804936	0.999816	species_specific
14:76771189-76773211	0	0.859687	0	0	0.653759	0	0.542737	0.0766187	-3.70616	0.0609148	0.805062	0.999816	MMU_CIRCpedia_32539
9:109057190-109073438	0	0.49125	0	0	0	0.37358	0.575201	0.0602251	-4.05349	0.0601479	0.806268	0.999816	species_specific
13:100330560-100340259	0	0	0.49071	0	0.392256	0	0.59092	0.0617223	-4.01806	0.0596578	0.807044	0.999816	MMU_CIRCpedia_212769
2:168161786-168167407	0	0	0.911318	0.854162	0	0	0.506295	0.083102	-3.58897	0.0593571	0.807521	0.999816	MMU_CIRCpedia_27002
1:32030297-32038619	0	0.49125	0	0	0.261504	0.622633	-0.56427	0.0720814	-3.79423	0.059228	0.807726	0.999816	species_specific
17:56844018-56845809	0	0	0.280406	0.591343	0	0	-0.574546	0.0597444	-4.06505	0.0588359	0.808351	0.999816	species_specific
1:28683582-28697084	0	0.552656	0.560811	0.262819	0.719135	0	0.451593	0.0916415	-3.44785	0.0585116	0.80887	0.999816	species_specific
1:86715723-86724405	0	0.368437	0	0.328524	0	0.37358	-0.585896	0.0643156	-3.95869	0.0584286	0.809003	0.999816	MMU_CIRCpedia_9515
9:137716625-137717182	0	0.368437	0.280406	0.262819	0.457631	0.435843	-0.503099	0.0828133	-3.59399	0.0581947	0.809378	0.999816	MMU_CIRCpedia_14291
2:200416378-200419496	0.421429	0.552656	0.630913	0.722753	0.392256	0.498106	0.338288	0.119343	-3.06682	0.0580835	0.809557	0.999816	species_specific
11:130260855-130261929	1.19405	1.84219	1.47213	1.70832	1.96128	2.49053	-0.109831	0.301813	-1.72828	0.0580686	0.809581	0.999816	MMU_CIRCpedia_16018
16:30704063-30704315	0.35119	0.368437	0	0	0.392256	0.871686	-0.472163	0.0875276	-3.51412	0.0576877	0.810195	0.999816	species_specific
3:47067069-47098081	0	0.9825	0.420608	1.11698	0.523007	0.560369	-0.320455	0.125442	-2.99491	0.0571585	0.811051	0.999816	species_specific
13:113520615-113534240	0	0.429844	0	0.394229	0.392256	0	-0.572134	0.0680712	-3.87681	0.0569497	0.811389	0.999816	species_specific
15:39590023-39590490	0.983333	0.429844	0.280406	0.394229	1.30752	0	0.319546	0.125634	-2.9927	0.0566363	0.811899	0.999816	NA
1:147286297-147287733	0	0.675469	0	0.919867	0.261504	0	-0.493383	0.0828052	-3.59413	0.0561773	0.812649	0.999816	species_specific
13:46003138-46020557	0	0.614062	0	0.657048	0	0.435843	-0.509042	0.0792137	-3.65811	0.0555999	0.813596	0.999816	MMU_CIRCpedia_29039
3:47097954-47106120	0.561905	0.552656	0.350507	0.919867	0	0.560369	0.350547	0.111906	-3.15964	0.0555872	0.813617	0.999816	MMU_CIRCpedia_2913
1:36009474-36027298	0	0.307031	0	0.591343	0	0	-0.560541	0.0599932	-4.05906	0.0555166	0.813734	0.999816	MMU_CIRCpedia_214994
12:120154969-120155719	0	0.9825	0	0.459934	0	0.37358	0.484063	0.0829181	-3.59217	0.0554481	0.813846	0.999816	MMU_CIRCpedia_3861
17:40161752-40162901	0	0.49125	0	0.394229	0	0	0.551692	0.0603732	-4.04995	0.0552105	0.814238	0.999816	species_specific
2:25799384-25806337	0	0.49125	0	0.394229	0	0	0.551692	0.0603732	-4.04995	0.0552105	0.814238	0.999816	MMU_CIRCpedia_17367
4:76144148-76144473	0	0	0.701014	0	0.588383	0	0.54405	0.0722851	-3.79016	0.0550855	0.814445	0.999816	MMU_CIRCpedia_37284
10:92834712-92909631	0	0.245625	0.350507	0.394229	0.261504	0.435843	-0.503841	0.0798495	-3.64657	0.0548612	0.814816	0.999816	species_specific
9:96458378-96458541	0	0	0.841217	0.788458	0	0	0.504678	0.07968	-3.64964	0.0548305	0.814867	0.999816	species_specific
4:38931450-38932374	0	0.49125	0.49071	0.525638	0.653759	0.435843	-0.385969	0.102215	-3.29032	0.0545918	0.815263	0.999816	species_specific
9:33986759-34017189	2.45833	2.70187	1.19172	2.89101	2.68041	2.98864	-0.0853374	0.40626	-1.29952	0.0543521	0.815662	0.999816	species_specific
4:75804133-75805303	0.280952	0	0	0.591343	0	0	-0.55191	0.059867	-4.06209	0.0542272	0.81587	0.999816	species_specific
8:68019548-68060779	0	0	0.280406	0	0	0.560369	-0.548692	0.0595215	-4.07045	0.0541205	0.816048	0.999816	species_specific
2:62979187-62996766	0.913095	1.10531	0.49071	0.394229	0.784511	1.55658	0.202626	0.169731	-2.55868	0.0541157	0.816056	0.999816	MMU_CIRCpedia_13445
18:79728906-79736521	0.561905	0.736875	0	1.05128	0.523007	0.498106	-0.323981	0.12057	-3.05206	0.0540351	0.816191	0.999816	species_specific
8:130358016-130361771	0	1.10531	0.911318	1.24839	0.784511	0.933949	-0.220696	0.159807	-2.6456	0.0534489	0.817173	0.999816	species_specific
5:65260599-65291470	0	0.49125	0	0.328524	0	0.560369	-0.536097	0.0717114	-3.80165	0.0531851	0.817617	0.999816	MMU_CIRCpedia_36296
5:133092699-133099652	0	0.429844	0	0	0.32688	0	0.523918	0.0578118	-4.11249	0.0530386	0.817863	0.999816	species_specific
19:5653114-5654456	0.702381	2.39484	0	1.64262	0.523007	1.30753	0.160966	0.197923	-2.33699	0.0530244	0.817887	0.999816	species_specific
7:17868406-17875790	0	0.368437	0.350507	0.591343	0.653759	0	-0.456194	0.0866961	-3.52789	0.0527046	0.818428	0.999816	species_specific
15:50458999-50459162	0	0.798281	0.630913	0.722753	0	0.684896	0.350009	0.108551	-3.20356	0.0525135	0.818752	0.999816	species_specific
11:108046269-108054955	0	0	1.05152	0.525638	0	0.498106	0.432272	0.0911904	-3.45497	0.0525021	0.818771	0.999816	species_specific
4:1900625-1939778	0	0.245625	0.49071	0.657048	0	0	0.521552	0.073365	-3.76876	0.052187	0.819306	0.999816	MMU_CIRCpedia_17013
10:3118781-3120044	1.75595	1.59656	1.40203	1.24839	2.15741	2.17921	0.105449	0.297802	-1.74757	0.0521803	0.819318	0.999816	species_specific
7:127704838-127721400	0	0.307031	0.560811	0.854162	0.32688	0.311316	-0.407564	0.0960924	-3.37943	0.0521103	0.819437	0.999816	MMU_CIRCpedia_15219
10:101798841-101800400	0	0	0.350507	0.722753	0	0	-0.553154	0.0645906	-3.95253	0.0520005	0.819624	0.999816	species_specific
12:109907525-109908937	0	0	0.350507	0.722753	0	0	-0.553154	0.0645906	-3.95253	0.0520005	0.819624	0.999816	species_specific
5:154033790-154034967	1.05357	0.736875	0.98142	1.3141	0.653759	1.183	0.174377	0.186876	-2.41985	0.0519448	0.819719	0.999816	species_specific
11:9713465-9732710	0	0	0.701014	1.3141	0	0	-0.448713	0.0873831	-3.5165	0.0518435	0.819891	0.999816	species_specific
19:38141183-38142710	0.35119	0.736875	1.12162	0.854162	0.784511	0.747159	0.229753	0.153743	-2.7014	0.0514162	0.820623	0.999816	species_specific
3:56660730-56673725	0	0.429844	0.701014	0.328524	0.849887	0.622633	-0.339978	0.111084	-3.17028	0.0510895	0.821184	0.999816	MMU_CIRCpedia_14939
17:29648143-29672129	0.561905	0	0	0.657048	0	0.435843	-0.488415	0.0792197	-3.658	0.0508987	0.821512	0.999816	MMU_CIRCpedia_29670
19:34221506-34221738	0	0.307031	0	0	0	0.560369	-0.534558	0.0597717	-4.06439	0.050851	0.821595	0.999816	MMU_CIRCpedia_212867
18:62539680-62550460	0.491667	0.9825	1.89274	1.57692	0.523007	1.80563	0.139972	0.219454	-2.18801	0.0502328	0.822664	0.999816	MMU_CIRCpedia_1652
3:196806578-196812851	0.280952	0.368437	0	0	0.523007	0	0.528661	0.0687292	-3.86293	0.0498567	0.823318	0.999816	species_specific
1:23030468-23044486	0.421429	0.307031	0	0.328524	0.261504	0.684896	-0.436788	0.0878069	-3.50952	0.0497257	0.823547	0.999816	MMU_CIRCpedia_8450
2:238182064-238185287	0.983333	0.675469	0.841217	0.919867	1.83053	0.809422	-0.167327	0.19002	-2.39577	0.0497193	0.823558	0.999816	species_specific
1:174272413-174305127	0	0.307031	0	0	0	0.249053	0.478171	0.0526203	-4.24824	0.0491222	0.824603	0.999816	MMU_CIRCpedia_218028
1:117402185-117442325	6.32143	9.51797	6.58953	9.65861	7.91049	11.7678	-0.0448411	1.3129	0.392757	0.0490754	0.824685	0.999816	MMU_CIRCpedia_234
1:8655972-8656441	4.77619	5.34234	3.15456	4.99356	4.90319	6.28859	0.0566076	0.769468	-0.378067	0.0490683	0.824698	0.999816	MMU_CIRCpedia_10055
10:110124016-110130486	0.421429	0	0	0	0	0.37358	0.523109	0.0592385	-4.07732	0.0488286	0.82512	0.999816	species_specific
15:52584744-52593736	0.421429	0	0	0	0	0.37358	0.523109	0.0592385	-4.07732	0.0488286	0.82512	0.999816	species_specific
3:129458598-129464781	0.421429	0	0	0	0	0.37358	0.523109	0.0592385	-4.07732	0.0488286	0.82512	0.999816	species_specific
5:154029488-154034967	0.421429	0	0	0	0	0.37358	0.523109	0.0592385	-4.07732	0.0488286	0.82512	0.999816	species_specific
5:77046346-77048272	0.421429	0	0	0	0	0.37358	0.523109	0.0592385	-4.07732	0.0488286	0.82512	0.999816	species_specific
17:28921687-28924302	0.561905	0	0	0	0.719135	0.311316	-0.480002	0.0789401	-3.6631	0.048659	0.825419	0.999816	MMU_CIRCpedia_227221
11:108227594-108229323	0	0.245625	0	0.459934	0	0	-0.50158	0.055509	-4.17113	0.0483969	0.825882	0.999816	MMU_CIRCpedia_22650
6:116689319-116692156	0	0.245625	0	0.459934	0	0	-0.50158	0.055509	-4.17113	0.0483969	0.825882	0.999816	species_specific
2:24135118-24147086	0	0.675469	0	0.657048	0	0.498106	-0.458445	0.0821904	-3.60489	0.0479034	0.826758	0.999816	species_specific
4:145845955-145849561	0	0	1.12162	0.525638	0.980639	0.311316	-0.326072	0.112216	-3.15565	0.0476355	0.827235	0.999816	MMU_CIRCpedia_30076
1:243330539-243344331	0.491667	0	0	0.591343	0	0.37358	-0.495117	0.0743612	-3.74931	0.0476153	0.827271	0.999816	MMU_CIRCpedia_12061
2:159136193-159150556	1.05357	0.307031	0	0.591343	0.784511	0	0.335841	0.108437	-3.20507	0.0474734	0.827525	0.999816	MMU_CIRCpedia_24628
17:40126182-40126406	2.52857	3.43875	1.47213	3.15383	2.87654	2.92637	0.0747824	0.444145	-1.1709	0.047454	0.827559	0.999816	species_specific
4:39874288-39877153	0.280952	0	0	0	0	0.249053	0.484385	0.0524276	-4.25353	0.0472648	0.827898	0.999816	species_specific
5:32395158-32400203	0	0.736875	0	0.394229	0.261504	0.560369	-0.435468	0.0855731	-3.5467	0.0470586	0.828268	0.999816	species_specific
15:57451499-57461892	4.35476	2.88609	2.52365	4.86216	3.7918	4.35843	-0.0623449	0.604405	-0.726412	0.0469352	0.82849	0.999816	MMU_CIRCpedia_40137
3:58125580-58126762	0	0.368437	0	0	0.392256	0.249053	-0.524667	0.0634973	-3.97716	0.0467191	0.828879	0.999816	species_specific
7:77581426-77583650	0.35119	0.245625	0	0.722753	0	0.37358	-0.465126	0.0796384	-3.65039	0.0466803	0.828949	0.999816	MMU_CIRCpedia_13142
16:66725827-66729099	0.35119	0	0.280406	0.591343	0	0	0.511637	0.0695912	-3.84495	0.0466388	0.829024	0.999816	species_specific
10:15140986-15141557	0.842857	0.9825	0	1.05128	0	0.871686	0.274555	0.13103	-2.93203	0.0465886	0.829115	0.999816	species_specific
1:220212886-220213979	0.35119	0.552656	0.420608	0.985572	0	1.12074	-0.296709	0.121936	-3.0358	0.046404	0.829448	0.999816	species_specific
5:154950820-154960049	0	0.245625	0.350507	0.525638	0	0	0.518286	0.0665694	-3.909	0.0460289	0.830128	0.999816	species_specific
4:128992166-129003876	0.842857	1.28953	1.05152	2.16826	0.980639	1.30753	-0.129469	0.225861	-2.14649	0.0459701	0.830235	0.999816	MMU_CIRCpedia_19704
2:32087491-32089605	0.35119	0	0	0.459934	0	0.249053	-0.519205	0.0646475	-3.95126	0.0459072	0.83035	0.999816	species_specific
4:82447919-82451245	0	0.9825	0	0.525638	0.392256	0.622633	-0.365804	0.0991766	-3.33386	0.0458057	0.830535	0.999816	MMU_CIRCpedia_216270
9:17330631-17342444	0.491667	0.429844	0	0.262819	0.261504	0.996212	-0.367204	0.098577	-3.34261	0.0452621	0.831528	0.999816	species_specific
8:27294079-27298559	0	0.552656	0	0.525638	0	0.435843	-0.478916	0.0747715	-3.74137	0.0450877	0.831848	0.999816	species_specific
6:169759837-169768171	0	0.307031	0	0.262819	0	0	0.457799	0.0527163	-4.24561	0.0450812	0.83186	0.999816	species_specific
7:38789800-38796864	0	0.307031	0	0.262819	0	0	0.457799	0.0527163	-4.24561	0.0450812	0.83186	0.999816	MMU_CIRCpedia_12569
6:35619095-35620274	0.421429	0	0	0.394229	0	0.435843	-0.500343	0.0694526	-3.84783	0.0447268	0.832512	0.999816	MMU_CIRCpedia_15193
4:139336847-139341069	0	0.307031	0	0	0.523007	0	-0.502243	0.0593017	-4.07578	0.0447148	0.832534	0.999816	species_specific
9:4823547-4827033	0.35119	0	0	0.328524	0	0	0.484473	0.0559532	-4.15963	0.0446029	0.832741	0.999816	species_specific
5:64800247-64804386	0	0	0.841217	0.722753	0	0.747159	-0.380514	0.0953176	-3.39111	0.0445445	0.832849	0.999816	MMU_CIRCpedia_1353
1:43308985-43309532	0	0	0.420608	0	0	0.37358	0.497546	0.0590545	-4.08181	0.0444938	0.832943	0.999816	MMU_CIRCpedia_221907
X:118441367-118443687	0	0	0.420608	0	0	0.37358	0.497546	0.0590545	-4.08181	0.0444938	0.832943	0.999816	species_specific
14:50150007-50150230	0.421429	0	0	0.394229	0	0	0.499712	0.059388	-4.07368	0.0444295	0.833062	0.999816	MMU_CIRCpedia_222015
2:32439507-32453942	0.421429	0	0	0.394229	0	0	0.499712	0.059388	-4.07368	0.0444295	0.833062	0.999816	species_specific
6:75659261-75678927	0.421429	0	0	0.394229	0	0	0.499712	0.059388	-4.07368	0.0444295	0.833062	0.999816	MMU_CIRCpedia_215810
13:52397231-52398194	0.421429	0.614062	0	0.262819	0.32688	1.05848	-0.33682	0.104257	-3.26179	0.0437941	0.834242	0.999816	species_specific
17:44435064-44464544	0.280952	0	0	0	0.523007	0	-0.494013	0.0591693	-4.07901	0.0437689	0.834289	0.999816	MMU_CIRCpedia_738
2:9535833-9536828	0	0.429844	0	0.262819	0	0.498106	-0.50293	0.0672828	-3.89362	0.0436409	0.834528	0.999816	species_specific
1:77916054-77918273	0.35119	0.368437	0.420608	0.328524	0.523007	0.249053	0.374282	0.0954293	-3.38942	0.0434468	0.834891	0.999816	species_specific
17:5354358-5363016	0.280952	0	0	0.262819	0	0	0.464013	0.0525244	-4.25087	0.0433525	0.835068	0.999816	species_specific
17:66062962-66070001	0.280952	0	0	0.262819	0	0	0.464013	0.0525244	-4.25087	0.0433525	0.835068	0.999816	species_specific
22:31462931-31463967	0.280952	0	0	0.262819	0	0	0.464013	0.0525244	-4.25087	0.0433525	0.835068	0.999816	MMU_CIRCpedia_16423
4:17909093-17972885	0.280952	0	0	0.262819	0	0	0.464013	0.0525244	-4.25087	0.0433525	0.835068	0.999816	MMU_CIRCpedia_20673
22:23791755-23793688	0	0.245625	0.701014	0.262819	0.653759	0.622633	-0.35228	0.100269	-3.31805	0.0433329	0.835105	0.999816	MMU_CIRCpedia_29185
15:92924320-92939718	0	0	0.280406	0	0	0.249053	0.461981	0.0523109	-4.25675	0.0432952	0.835175	0.999816	MMU_CIRCpedia_28448
8:1876570-1909470	0	0	0.280406	0	0	0.249053	0.461981	0.0523109	-4.25675	0.0432952	0.835175	0.999816	species_specific
3:56566593-56567053	2.24762	1.90359	1.96284	2.7596	2.15741	3.29995	-0.0774004	0.393789	-1.3445	0.0426862	0.836322	0.999816	species_specific
7:111895611-111901801	0.491667	0	0.280406	0.657048	0.32688	0.37358	-0.388356	0.0913972	-3.45171	0.0425425	0.836594	0.999816	MMU_CIRCpedia_19422
15:58912562-58913696	1.475	0.798281	0.630913	0.788458	1.11139	1.43205	0.14824	0.195674	-2.35348	0.0423172	0.837021	0.999816	MMU_CIRCpedia_229007
16:2756333-2757945	0.561905	0	0	0.394229	0.392256	0.249053	-0.448945	0.0784566	-3.67196	0.0422993	0.837055	0.999816	species_specific
4:4648976-4649542	0.491667	0.552656	0.841217	1.24839	0	0.809422	0.248608	0.136574	-2.87225	0.0421142	0.837407	0.999816	species_specific
3:52737585-52739634	0	0.429844	0	0	0	0.747159	-0.493934	0.0671821	-3.89578	0.042047	0.837535	0.999816	species_specific
17:41981854-41982401	0.421429	0	0.280406	0	0.392256	0.249053	0.467324	0.0735435	-3.76526	0.0416249	0.838341	0.999816	species_specific
5:177191883-177204292	0.491667	0.245625	0.420608	0.657048	0.261504	0.249053	0.357547	0.0972915	-3.36154	0.0414927	0.838595	0.999816	species_specific
14:30947089-30956242	1.05357	0.245625	0	0.657048	0.588383	0.809422	-0.279618	0.122021	-3.0348	0.0409959	0.839551	0.999816	species_specific
3:98881539-98881767	0	0	0.560811	0.525638	0	0	0.491815	0.0660166	-3.92103	0.0408121	0.839906	0.999816	species_specific
18:8718423-8720496	7.09405	6.20203	5.0473	9.65861	6.27609	6.78669	0.0449053	1.05842	0.0819138	0.0407894	0.83995	0.999816	MMU_CIRCpedia_26526
13:46723220-46733998	0	0	0.420608	0.394229	0	0	0.47415	0.0592037	-4.07817	0.0402957	0.840908	0.999816	MMU_CIRCpedia_28856
22:50128415-50142189	0	0	0.420608	0.394229	0	0	0.47415	0.0592037	-4.07817	0.0402957	0.840908	0.999816	species_specific
22:39230083-39231827	0	0	0.49071	0.459934	0	0	0.484466	0.0626083	-3.9975	0.0399868	0.841511	0.999816	MMU_CIRCpedia_38461
17:7939512-7940242	0.702381	0	0	0.262819	0.588383	0.37358	-0.393542	0.0870565	-3.5219	0.039523	0.842421	0.999816	species_specific
10:120513910-120521095	0.561905	0.368437	0	0.657048	0	0.249053	0.404035	0.0844664	-3.56548	0.0395106	0.842445	0.999816	species_specific
22:41172498-41173784	0	1.35094	0.420608	1.3141	0.588383	0.684896	-0.22373	0.143452	-2.80136	0.0394545	0.842556	0.999816	species_specific
14:31127784-31172122	0	0.552656	0	0.459934	0.457631	0	-0.450749	0.0742091	-3.75226	0.0393368	0.842788	0.999816	species_specific
3:196483769-196488683	0.491667	1.41234	0.701014	0.722753	1.17677	0.996212	0.164578	0.175155	-2.5133	0.0392877	0.842884	0.999816	species_specific
3:56592969-56594028	1.54524	1.78078	3.36487	2.7596	3.20342	2.11695	0.0723734	0.408769	-1.29064	0.0391349	0.843186	0.999816	species_specific
15:42515236-42529819	0.632143	0	0	0.854162	0	0.311316	-0.411928	0.0827091	-3.59581	0.0389899	0.843473	0.999816	species_specific
5:61472680-61494410	0	0	0.420608	0	0.392256	0.37358	-0.470352	0.0684214	-3.86941	0.0387861	0.843878	0.999816	MMU_CIRCpedia_2173
3:94003658-94003908	0.772619	0.245625	0.49071	0.459934	0.392256	0.747159	0.281079	0.117448	-3.08991	0.0386827	0.844083	0.999816	MMU_CIRCpedia_25401
1:27789561-27793632	0	0.368437	0	0	0	0.311316	0.436001	0.0556363	-4.16783	0.0384319	0.844583	0.999816	species_specific
17:5365121-5368468	0	0.368437	0	0	0	0.311316	0.436001	0.0556363	-4.16783	0.0384319	0.844583	0.999816	species_specific
4:150735257-150808398	0	0.368437	0	0	0	0.311316	0.436001	0.0556363	-4.16783	0.0384319	0.844583	0.999816	species_specific
12:49494740-49500205	0	0.368437	0	0.657048	0	0	-0.474215	0.0630185	-3.98808	0.0383822	0.844682	0.999816	MMU_CIRCpedia_36837
7:50669721-50756056	0	0.429844	0.420608	0.657048	0	0.747159	-0.359067	0.0931875	-3.42372	0.0380682	0.845311	0.999816	species_specific
16:31722625-31723353	0	1.47375	1.26183	1.24839	0.784511	1.05848	0.152776	0.181997	-2.45801	0.0377564	0.845938	0.999816	species_specific
12:1115865-1190052	0	0.368437	0.280406	0.591343	0	0	0.456869	0.0692641	-3.85175	0.0376626	0.846127	0.999816	MMU_CIRCpedia_4903
6:154860737-154860998	0	0.49125	0.280406	0.262819	0	0.435843	0.433032	0.0751502	-3.73408	0.03757	0.846314	0.999816	species_specific
1:21748137-21751615	0	0.49125	0	0.854162	0	0	-0.454714	0.0704999	-3.82623	0.0375198	0.846415	0.999816	species_specific
16:27701588-27708920	0	0.429844	0.420608	0	0.784511	0.560369	-0.357241	0.0930808	-3.42537	0.0374019	0.846654	0.999816	species_specific
1:20770929-20773610	0.421429	0.368437	1.12162	1.44551	0.457631	0.933949	-0.192458	0.155666	-2.68348	0.0373245	0.84681	0.999816	species_specific
4:177353307-177360677	0.35119	0.552656	0.771115	0	0.32688	1.43205	0.258249	0.12507	-2.99919	0.0369582	0.847555	0.999816	species_specific
10:96944112-96952196	0	0.368437	0	0.394229	0	0.249053	-0.463702	0.0629191	-3.99036	0.0367408	0.847998	0.999816	MMU_CIRCpedia_19669
1:227004993-227017050	0	0.675469	0	0	0.32688	0.747159	-0.405358	0.0811582	-3.62312	0.0366383	0.848208	0.999816	species_specific
1:33294936-33295305	0	1.35094	0.771115	1.3798	0.915263	0	0.204572	0.147108	-2.76505	0.03605	0.849417	0.999816	species_specific
9:128508875-128515639	0	0	0.911318	0	0.32688	0.560369	0.385682	0.0848372	-3.55916	0.0360025	0.849515	0.999816	species_specific
18:32111753-32124845	0	0	0.49071	0.919867	0	0	-0.436392	0.0728316	-3.77929	0.0360023	0.849515	0.999816	MMU_CIRCpedia_13135
8:17972328-17972687	0.280952	0.307031	0	0.459934	0	0.560369	-0.412128	0.0777212	-3.68555	0.035338	0.850894	0.999816	species_specific
1:26729650-26732792	1.12381	1.41234	2.59375	1.64262	2.35353	2.86411	-0.078834	0.337207	-1.56829	0.0352823	0.85101	0.999816	MMU_CIRCpedia_8008
7:2363631-2364529	0	0	0.420608	0	0.261504	0.498106	-0.4485	0.0681725	-3.87467	0.035211	0.851159	0.999816	species_specific
1:230178217-230203290	0	0.368437	0	0.328524	0	0	0.413924	0.0557577	-4.16469	0.0346511	0.852333	0.999816	species_specific
1:51827795-51834170	0	0.368437	0	0.328524	0	0	0.413924	0.0557577	-4.16469	0.0346511	0.852333	0.999816	species_specific
16:67685456-67685802	0	0.368437	0	0.328524	0	0	0.413924	0.0557577	-4.16469	0.0346511	0.852333	0.999816	species_specific
20:23389945-23403072	0	0.368437	0	0.328524	0	0	0.413924	0.0557577	-4.16469	0.0346511	0.852333	0.999816	species_specific
12:96294998-96300360	0	0.49125	0.49071	0.722753	0.392256	0.435843	-0.31403	0.100356	-3.3168	0.0346511	0.852333	0.999816	species_specific
8:47279861-47294030	0	0.429844	0	0.394229	0.32688	0	-0.452289	0.0665268	-3.90992	0.0346125	0.852414	0.999816	species_specific
20:32316217-32316874	1.05357	0.49125	0.560811	0.657048	1.17677	1.183	-0.166924	0.166593	-2.5856	0.0343697	0.852927	0.999816	MMU_CIRCpedia_10451
2:106122969-106166083	0.632143	0.675469	0	1.3798	0	0	0.294277	0.104589	-3.2572	0.033972	0.853771	0.999816	MMU_CIRCpedia_20153
8:68038158-68060779	0	0.675469	0.49071	0	1.04601	0.684896	-0.278048	0.110346	-3.1799	0.0338211	0.854092	0.999816	MMU_CIRCpedia_225245
6:47607926-47612536	0.35119	0.429844	0	0	0.457631	0.249053	0.403309	0.0764585	-3.70918	0.0332233	0.855373	0.999816	species_specific
19:10162666-10166685	0	0.736875	0.49071	0.262819	0.32688	0.622633	0.309177	0.0992943	-3.33214	0.0331534	0.855524	0.999816	MMU_CIRCpedia_37872
3:32544875-32545965	0	0.49125	0	0	0	0.809422	-0.427766	0.0701698	-3.83301	0.0331272	0.85558	0.999816	species_specific
6:167864550-167891029	0	0.49125	0	0	0	0.809422	-0.427766	0.0701698	-3.83301	0.0331272	0.85558	0.999816	MMU_CIRCpedia_8587
13:49138746-49145935	1.82619	1.10531	0.841217	1.77403	1.04601	1.68111	0.101211	0.245247	-2.02769	0.0330487	0.855749	0.999816	species_specific
10:116915374-116921516	0	0	0.280406	0.525638	0	0	-0.421054	0.0582819	-4.10081	0.0328879	0.856097	0.999816	species_specific
17:8444259-8460160	0	0	0.280406	0.525638	0	0	-0.421054	0.0582819	-4.10081	0.0328879	0.856097	0.999816	MMU_CIRCpedia_27059
10:5785141-5800705	0.280952	0	0.630913	0	0.719135	0.747159	-0.313141	0.0985903	-3.34241	0.0327822	0.856326	0.999816	MMU_CIRCpedia_17758
15:44550875-44551522	0	0	1.05152	1.11698	0	0	0.335601	0.0928587	-3.42882	0.0327788	0.856333	0.999816	species_specific
10:5796762-5800705	1.33452	1.22812	0	0.722753	1.24214	0.933949	0.150439	0.17506	-2.51408	0.0326085	0.856703	0.999816	MMU_CIRCpedia_17756
20:8740343-8765358	0.421429	0.368437	0	0	0	0.747159	0.395318	0.0773871	-3.69176	0.0324725	0.856999	0.999816	species_specific
1:9931890-9934860	3.09048	2.76328	4.9071	6.43907	2.35353	4.54522	0.0502425	0.637342	-0.64986	0.0321009	0.857811	0.999816	species_specific
17:37576340-37585430	0	0.9825	0.350507	0.394229	0.915263	0	0.282808	0.104342	-3.26061	0.0314811	0.859176	0.999816	species_specific
16:88627621-88628854	0.421429	0.675469	0.771115	0.985572	1.04601	0	0.215002	0.13642	-2.87387	0.0314298	0.859289	0.999816	species_specific
11:57491223-57491862	0	0.307031	0	0	0.261504	0	0.380356	0.0530868	-4.2355	0.0313815	0.859396	0.999816	species_specific
14:80831142-80838278	0	0.307031	0	0	0.261504	0	0.380356	0.0530868	-4.2355	0.0313815	0.859396	0.999816	species_specific
2:28776850-28793997	0	0.307031	0	0	0.261504	0	0.380356	0.0530868	-4.2355	0.0313815	0.859396	0.999816	MMU_CIRCpedia_16531
2:96733518-96734526	0	0.307031	0	0	0.261504	0	0.380356	0.0530868	-4.2355	0.0313815	0.859396	0.999816	MMU_CIRCpedia_18102
19:48221729-48241063	0	1.04391	0.420608	1.05128	0.784511	0.311316	-0.235896	0.126133	-2.98699	0.0312646	0.859656	0.999816	species_specific
8:6724869-6747828	0.561905	0	0	0.394229	0.588383	0	-0.389585	0.077411	-3.69132	0.0311804	0.859843	0.999816	species_specific
11:72887469-72889945	0.491667	0.307031	0.420608	0.525638	0.719135	0.622633	-0.25492	0.115329	-3.11617	0.0308054	0.86068	0.999816	MMU_CIRCpedia_37078
2:72718102-72741469	0	0.552656	0	0	0.849887	0	-0.401289	0.0733636	-3.76879	0.0305373	0.861281	0.999816	MMU_CIRCpedia_31896
6:73480674-73482244	0	0.552656	0	0	0.457631	0	0.416326	0.06408	-3.96398	0.0305366	0.861282	0.999816	species_specific
9:110136126-110138539	0	0.552656	0	0	0.457631	0	0.416326	0.06408	-3.96398	0.0305366	0.861282	0.999816	MMU_CIRCpedia_23998
17:77402058-77402703	0.35119	0	0	0	0.32688	0	0.400613	0.0564285	-4.14743	0.0303589	0.861683	0.999816	MMU_CIRCpedia_4231
4:147946616-147966839	0.561905	0.49125	0	0.657048	0	0.996212	-0.278552	0.104599	-3.25706	0.0302536	0.86192	0.999816	MMU_CIRCpedia_29632
12:56116774-56117211	0.280952	0	0	0	0.261504	0	0.38657	0.0528982	-4.24064	0.0300965	0.862276	0.999816	species_specific
3:171157459-171167270	0.421429	0.859687	0.841217	1.11698	0.653759	1.24527	-0.157679	0.16477	-2.60147	0.0298832	0.86276	0.999816	species_specific
3:136604308-136604473	1.05357	0.614062	1.33193	1.51121	0.915263	1.12074	0.119112	0.202807	-2.30182	0.0298047	0.862938	0.999816	species_specific
12:109907525-109911235	0	0	0.420608	0	0.719135	0	-0.415752	0.0676088	-3.88665	0.0297995	0.86295	0.999816	species_specific
17:28880885-28881191	0	0.49125	0	0.328524	0.457631	0	-0.40785	0.069746	-3.84174	0.0297193	0.863133	0.999816	NA
17:46170854-46172232	0	0.368437	1.05152	0.722753	0	0.809422	0.255939	0.112141	-3.15661	0.0296634	0.86326	0.999816	MMU_CIRCpedia_1209
3:18378169-18420991	0.491667	0	0	0	0.457631	0	0.418025	0.063513	-3.9768	0.0296404	0.863313	0.999816	species_specific
1:244418759-244420296	0.421429	0	0.630913	0.788458	0.32688	0	0.316743	0.0936	-3.41735	0.0296114	0.863379	0.999816	species_specific
11:94850113-94859715	0.491667	0	0	0.328524	0	0.560369	-0.393469	0.0728297	-3.77933	0.0293624	0.863949	0.999816	species_specific
2:168161786-168182090	0	0	0.350507	0.328524	0	0.311316	-0.412913	0.0630061	-3.98836	0.0293466	0.863985	0.999816	MMU_CIRCpedia_27003
12:96298868-96300360	3.30119	6.07922	3.64527	8.2131	3.98793	4.9188	-0.0435674	0.775924	-0.366014	0.0293417	0.863997	0.999816	species_specific
15:49235850-49239367	0	0	0.49071	0.394229	0.457631	0	-0.391512	0.0720765	-3.79433	0.0284783	0.865993	0.999816	species_specific
3:32534510-32545965	0	0.307031	0	0.262819	0	0.249053	-0.393632	0.0584438	-4.09681	0.028258	0.866508	0.999816	species_specific
4:39737419-39777810	0	0.49125	0.280406	0.394229	0.32688	0	0.371881	0.0758344	-3.721	0.0280841	0.866915	0.999816	MMU_CIRCpedia_26200
8:60584207-60591969	0.35119	0.49125	0	0	0	0.809422	0.356994	0.079996	-3.64393	0.0280425	0.867013	0.999816	MMU_CIRCpedia_32150
16:53255599-53268126	0.280952	0	0.630913	0.394229	0	0.560369	0.334509	0.0859135	-3.54097	0.027783	0.867624	0.999816	species_specific
5:131504625-131548190	0	0.736875	0	0.657048	0	0.498106	-0.34183	0.0837586	-3.57762	0.0277335	0.867741	0.999816	species_specific
3:9453738-9464672	0	0.429844	0	0.394229	0	0	0.38118	0.0587937	-4.08819	0.0275454	0.868186	0.999816	MMU_CIRCpedia_3511
7:111808820-111834686	0	0.429844	0	0.394229	0	0	0.38118	0.0587937	-4.08819	0.0275454	0.868186	0.999816	species_specific
14:88575839-88578140	0	0	0.280406	0	0.261504	0	0.364166	0.0527808	-4.24384	0.0269399	0.86963	0.999816	species_specific
3:197830769-197839397	0.983333	0.552656	0.280406	0.722753	0.849887	0.435843	0.202121	0.135029	-2.88866	0.0269353	0.869641	0.999816	species_specific
9:69236027-69237136	0	0	0.560811	0	0.523007	0	0.396284	0.0668074	-3.90385	0.0267486	0.870089	0.999816	species_specific
5:168488601-168494650	1.05357	1.47375	1.61233	1.90544	1.50365	1.55658	0.0840018	0.265025	-1.9158	0.0266683	0.870283	0.999816	species_specific
20:47736702-47757463	0	0.307031	0	0	0	0.498106	-0.380962	0.0583459	-4.09923	0.0265595	0.870545	0.999816	species_specific
16:77319848-77335904	0	0	0.630913	0	0	0.622633	0.382797	0.0706334	-3.8235	0.0264988	0.870692	0.999816	MMU_CIRCpedia_3576
3:136464880-136502779	0.421429	0	0	0	0.719135	0	-0.390633	0.0678022	-3.88252	0.0264264	0.870867	0.999816	MMU_CIRCpedia_223769
1:35388909-35390098	1.19405	0	0	0	0.653759	1.183	-0.235977	0.11535	-3.11591	0.0263961	0.870941	0.999816	species_specific
14:102999564-103012188	0	0	0.420608	0	0.392256	0	0.385163	0.0597817	-4.06415	0.0263402	0.871076	0.999816	MMU_CIRCpedia_3148
15:41464770-41466252	0	0	0.420608	0	0.392256	0	0.385163	0.0597817	-4.06415	0.0263402	0.871076	0.999816	MMU_CIRCpedia_4868
8:140818276-140890769	0.280952	0	0	0	0	0.498106	-0.373359	0.0582059	-4.10269	0.0261185	0.871615	0.999816	MMU_CIRCpedia_28379
6:107503656-107506427	0.421429	1.41234	0	0.788458	0.849887	0.933949	-0.178104	0.145586	-2.78006	0.0261141	0.871626	0.999816	MMU_CIRCpedia_20024
17:66175043-66183307	0	0	0.49071	0	0.457631	0	0.391522	0.0632918	-3.98184	0.0261102	0.871635	0.999816	MMU_CIRCpedia_2325
18:13681604-13682105	0	0	0.49071	0	0.457631	0	0.391522	0.0632918	-3.98184	0.0261102	0.871635	0.999816	species_specific
7:139407173-139409654	0	0	0.49071	0	0.457631	0	0.391522	0.0632918	-3.98184	0.0261102	0.871635	0.999816	species_specific
16:18841564-18845651	0.632143	0.552656	0.560811	0.854162	0.457631	0.622633	0.207077	0.130663	-2.93607	0.0260788	0.871712	0.999816	MMU_CIRCpedia_223064
15:50583088-50592626	0.35119	0	0	0.328524	0	0.311316	-0.388653	0.0631626	-3.98479	0.0260397	0.871807	0.999816	MMU_CIRCpedia_6689
8:91970657-91975973	0	0.552656	0	0.262819	0.588383	0	-0.371061	0.0729653	-3.77665	0.0259532	0.872018	0.999816	MMU_CIRCpedia_8707
9:34269256-34286704	0	0.429844	0	0.328524	0	0.37358	-0.391135	0.0658893	-3.92381	0.0259334	0.872067	0.999816	species_specific
7:158759485-158764853	0.421429	0.614062	0.841217	1.44551	0	0.684896	0.192832	0.137615	-2.86129	0.025881	0.872195	0.999816	species_specific
17:76312869-76313891	0.421429	0.307031	0.560811	1.3798	0.588383	0	-0.225968	0.118768	-3.07378	0.0255405	0.873032	0.999816	species_specific
3:111913318-111920419	0.561905	0.307031	0.911318	0.525638	0.588383	0.871686	0.199335	0.133796	-2.90189	0.0254539	0.873245	0.999816	species_specific
7:26684735-26690362	0.280952	0.552656	0.350507	0.394229	0.392256	0.435843	0.272442	0.0988108	-3.33919	0.0252961	0.873635	0.999816	species_specific
6:13227815-13230193	0.280952	0.368437	0	0	0.523007	0.498106	-0.339463	0.0801372	-3.64138	0.0250945	0.874136	0.999816	MMU_CIRCpedia_20010
1:222724091-222725555	0.35119	0.614062	0.841217	0.525638	0.653759	0.809422	0.196944	0.13377	-2.90217	0.0250357	0.874282	0.999816	species_specific
6:53071056-53076543	1.33452	0.736875	0.771115	1.24839	1.11139	0.996212	0.115051	0.194216	-2.36426	0.0249555	0.874482	0.999816	MMU_CIRCpedia_29819
2:61178980-61185618	0	0	0.630913	0.328524	0	0.311316	0.369738	0.0707623	-3.82087	0.0247612	0.874967	0.999816	species_specific
16:29833732-29834066	0.280952	0	0.350507	0.657048	0	0	0.368861	0.0710225	-3.81558	0.0246933	0.875137	0.999816	species_specific
7:42148225-42148468	0.491667	1.28953	0.420608	0.591343	1.04601	0.809422	0.157757	0.153919	-2.69976	0.0246351	0.875284	0.999816	MMU_CIRCpedia_10604
X:118396969-118404444	0	0.429844	0	0	0	0.684896	-0.378905	0.0657639	-3.92656	0.0243701	0.875951	0.999816	species_specific
2:61178980-61186497	0.913095	0.859687	0.630913	1.57692	0.849887	0.933949	-0.124805	0.180651	-2.46873	0.0243332	0.876044	0.999816	species_specific
10:179993-221356	0.280952	0	0.49071	0.328524	0.457631	0	0.336961	0.0785708	-3.66986	0.0238694	0.877221	0.999816	MMU_CIRCpedia_35505
10:80425865-80427496	0	0.614062	0	0.591343	0	0.37358	-0.341818	0.0763675	-3.7109	0.0236367	0.877817	0.999816	species_specific
1:1815755-1825499	2.80952	3.43875	3.57517	4.46793	3.92256	4.48295	-0.0440828	0.600597	-0.735532	0.0233938	0.878441	0.999816	MMU_CIRCpedia_10609
1:41008793-41009589	0.632143	0	0.49071	0.985572	0.261504	0	0.264032	0.0984849	-3.34395	0.0231456	0.879083	0.999816	species_specific
19:32899856-32901412	0	0.429844	0.98142	0.525638	0.980639	0	0.225713	0.112284	-3.15477	0.0231381	0.879102	0.999816	species_specific
18:54271359-54274090	0	0.307031	0.630913	0.657048	0	0.809422	-0.265793	0.0973108	-3.36126	0.0230387	0.87936	0.999816	species_specific
7:92225719-92226682	0.632143	0.307031	0.49071	0.854162	0	0.747159	0.221991	0.114341	-3.12859	0.0230278	0.879388	0.999816	species_specific
11:117152440-117163892	0.983333	1.78078	1.12162	1.51121	1.56902	1.55658	0.0823676	0.249744	-2.00148	0.0229777	0.879519	0.999816	MMU_CIRCpedia_20756
16:67628369-67629533	0.561905	0	0	0.591343	0	0	0.364097	0.0677394	-3.88386	0.0228432	0.879869	0.999816	MMU_CIRCpedia_1522
15:41069569-41070547	0.421429	0.921094	1.19172	1.3141	1.17677	0.996212	-0.114924	0.187327	-2.41637	0.0227354	0.880151	0.999816	species_specific
19:3623687-3624162	0	0	0.560811	0	0	0.560369	0.363098	0.0672516	-3.89429	0.0225853	0.880544	0.999816	species_specific
2:65090982-65104806	0	0	0.560811	0	0	0.560369	0.363098	0.0672516	-3.89429	0.0225853	0.880544	0.999816	species_specific
2:73088049-73089315	0	0	0.560811	0	0	0.560369	0.363098	0.0672516	-3.89429	0.0225853	0.880544	0.999816	MMU_CIRCpedia_32040
3:47037665-47046621	0	0.49125	0	0.459934	0	0	0.355756	0.0618248	-4.01567	0.0225202	0.880715	0.999816	species_specific
3:191357087-191361159	0.632143	1.41234	0	0.788458	0.849887	1.183	-0.145011	0.157227	-2.66908	0.0219915	0.882113	0.999816	MMU_CIRCpedia_14928
2:135769768-135772547	0	0.49125	0.701014	0.459934	0	0.809422	0.250955	0.0996937	-3.32635	0.0219384	0.882255	0.999816	MMU_CIRCpedia_220602
10:91951402-91953873	0	0.736875	0	0.788458	0.32688	0	-0.307193	0.0830423	-3.59001	0.0218944	0.882372	0.999816	MMU_CIRCpedia_18338
6:104744159-104750472	0	0	0.280406	0	0.457631	0	-0.341504	0.0574826	-4.12073	0.0218072	0.882605	0.999816	species_specific
6:75634706-75670720	0	0.429844	0.280406	0	0	0.684896	0.334672	0.0734661	-3.76678	0.0217551	0.882744	0.999816	species_specific
9:135850136-135883078	0.35119	0.368437	0	0.591343	0	0.560369	-0.301175	0.0841605	-3.57071	0.0217545	0.882746	0.999816	species_specific
17:75812111-75813878	0	0.614062	0	0	0	0.560369	0.34825	0.067647	-3.88583	0.0216964	0.882901	0.999816	species_specific
17:47664158-47674782	0.772619	0	0	0.394229	0	0.435843	0.317827	0.079368	-3.6553	0.0215168	0.883383	0.999816	species_specific
9:33971650-34017189	0.35119	0.245625	0	0.328524	0.261504	0.37358	-0.321018	0.0771503	-3.69619	0.0211701	0.88432	0.999816	species_specific
7:24623665-24668660	0.35119	0.368437	0.630913	0.985572	0.523007	0.498106	-0.201295	0.121416	-3.04197	0.0211367	0.884411	0.999816	MMU_CIRCpedia_21748
7:55982209-55983868	0.561905	0.552656	0.280406	0.459934	0.457631	1.12074	-0.197791	0.123355	-3.01911	0.0210771	0.884572	0.999816	species_specific
16:85633913-85634132	0.772619	0	0	0.591343	0	0.684896	-0.278028	0.0894343	-3.48303	0.0210602	0.884619	0.999816	MMU_CIRCpedia_5158
4:25314045-25315400	0	0	0.49071	0.854162	0	0	-0.33509	0.0713768	-3.8084	0.0207159	0.885559	0.999816	species_specific
13:40942951-40943925	0	0.552656	0.420608	0.525638	0.457631	0	0.280863	0.0873076	-3.51775	0.0206538	0.88573	0.999816	MMU_CIRCpedia_39268
11:128768117-128782023	2.0369	3.93	1.68243	3.87658	2.54966	3.61127	-0.0471764	0.47125	-1.08543	0.0203873	0.886464	0.999816	species_specific
2:135769768-135770735	1.40476	1.35094	0.701014	0.985572	1.6344	1.49432	0.0849442	0.227784	-2.13426	0.0201681	0.887072	0.999816	species_specific
11:108267170-108267342	1.40476	1.84219	1.26183	2.36537	1.37289	1.74337	0.0678411	0.285685	-1.8075	0.0201409	0.887148	0.999816	species_specific
3:49286097-49286325	0	0.49125	0	0.394229	0	0.37358	-0.335046	0.0689059	-3.85923	0.0198978	0.887826	0.999816	species_specific
4:176711498-176729746	0	0	0.49071	0	0.784511	0	-0.328717	0.0711173	-3.81366	0.0196748	0.888452	0.999816	MMU_CIRCpedia_22806
6:144482208-144488834	0	0	0.560811	0.591343	0	0	0.337264	0.0674814	-3.88937	0.0195669	0.888757	0.999816	species_specific
14:73147794-73173707	0.421429	0.49125	0	0	0.784511	0.560369	-0.253262	0.0948737	-3.39785	0.0195401	0.888833	0.999816	species_specific
17:28921687-28927063	0	0.49125	0	0.262819	0	0.498106	-0.330587	0.0688553	-3.86029	0.019362	0.889337	0.999816	MMU_CIRCpedia_29801
20:43702489-43702903	0	0.368437	0	0.591343	0	0	-0.335681	0.06157	-4.02163	0.0192735	0.889588	0.999816	species_specific
3:33400188-33425741	0	0.368437	0	0.591343	0	0	-0.335681	0.06157	-4.02163	0.0192735	0.889588	0.999816	MMU_CIRCpedia_3638
12:14423908-14425473	0	0	0.49071	0	0	0.498106	0.337248	0.0638728	-3.96866	0.0192534	0.889646	0.999816	MMU_CIRCpedia_8428
17:4242255-4242448	0	0	0.49071	0	0	0.498106	0.337248	0.0638728	-3.96866	0.0192534	0.889646	0.999816	species_specific
2:15488893-15511350	0	0	0.49071	0	0	0.498106	0.337248	0.0638728	-3.96866	0.0192534	0.889646	0.999816	MMU_CIRCpedia_7914
5:176970741-176982623	0.280952	0	0	0	0.457631	0	-0.319008	0.0576039	-4.11769	0.0190409	0.890252	0.999816	MMU_CIRCpedia_23070
3:125288102-125331238	0.842857	0	0	0	0.457631	0.435843	0.284146	0.0835467	-3.58127	0.0188235	0.890877	0.999816	MMU_CIRCpedia_16908
18:76849525-76851939	0.632143	0.368437	0	0	0.719135	0.311316	0.258989	0.0904761	-3.46632	0.0187165	0.891186	0.999816	MMU_CIRCpedia_31096
12:122327946-122328426	0	0	1.33193	0	0.719135	0.747159	0.207593	0.110317	-3.18027	0.0187043	0.891221	0.999816	MMU_CIRCpedia_6162
7:73459535-73470483	0	0.245625	0.701014	0	0	0.996212	0.267483	0.0875087	-3.51443	0.0186101	0.891493	0.999816	MMU_CIRCpedia_8244
1:235152705-235155112	0.280952	0.368437	0	0.722753	0	0.311316	-0.292217	0.0794036	-3.65465	0.0184212	0.892042	0.999816	species_specific
6:89751430-89753622	0	0.736875	0	0.722753	0	0	0.303326	0.0739092	-3.7581	0.018315	0.892352	0.999816	species_specific
8:51845660-51861246	0.421429	1.47375	0	0.985572	1.11139	0.498106	-0.145879	0.147796	-2.75832	0.018307	0.892375	0.999816	MMU_CIRCpedia_27729
1:108692867-108693570	0	0.245625	0	0.394229	0	0	-0.30577	0.0540524	-4.2095	0.0182597	0.892514	0.999816	NA
6:157928598-157936040	0	0.245625	0	0.394229	0	0	-0.30577	0.0540524	-4.2095	0.0182597	0.892514	0.999816	species_specific
11:68591575-68600494	0	0.307031	0.350507	0	0.261504	0.747159	-0.2881	0.0798539	-3.64649	0.0180411	0.893155	0.999816	species_specific
1:93876267-93877862	1.96667	1.965	0.701014	2.36537	1.24214	2.55279	-0.0599523	0.304112	-1.71733	0.0175659	0.894563	0.999816	species_specific
1:77631849-77641655	0	0.675469	0	0	0	0.996212	-0.28527	0.0791144	-3.65992	0.0174499	0.89491	0.999816	MMU_CIRCpedia_10372
16:67036638-67082308	0	1.04391	0.630913	0.854162	0.915263	0.560369	-0.160167	0.136447	-2.87359	0.0174062	0.895041	0.999816	MMU_CIRCpedia_1407
21:37420298-37472880	0.702381	0.245625	1.05152	0.854162	0.915263	0.560369	0.142233	0.148156	-2.75481	0.017335	0.895254	0.999816	MMU_CIRCpedia_34907
3:9443307-9445740	0	0.429844	0	0.394229	0.261504	0	-0.319942	0.0649816	-3.94382	0.0172625	0.895472	0.999816	MMU_CIRCpedia_3510
14:37285317-37308519	0.491667	0.552656	0.841217	1.97114	0.719135	0	-0.136824	0.151046	-2.72694	0.017183	0.895712	0.999816	MMU_CIRCpedia_23808
9:83677726-83678599	0	0.49125	0.560811	0.394229	0.457631	0.684896	-0.215017	0.102315	-3.28891	0.0170547	0.8961	0.999816	species_specific
7:139398598-139409654	1.475	1.53516	1.12162	2.43108	0.980639	2.11695	-0.0641884	0.27638	-1.85527	0.0169089	0.896542	0.999816	MMU_CIRCpedia_18939
19:48149762-48151339	1.05357	0	0	0	0	1.183	0.233786	0.0957844	-3.38407	0.0168682	0.896666	0.999816	species_specific
21:46326376-46367139	0.280952	0.49125	0.420608	0	0.523007	0.747159	0.216184	0.100713	-3.31168	0.01669	0.89721	0.999816	species_specific
8:125357218-125357818	0	0.675469	0	0.459934	0.523007	0	-0.279963	0.0788985	-3.66386	0.0165985	0.897491	0.999816	MMU_CIRCpedia_218551
1:8541213-8557523	0	0.368437	0	0	0	0.560369	-0.30966	0.0613472	-4.02686	0.0165025	0.897786	0.999816	MMU_CIRCpedia_10091
13:102807145-102834552	0	0.368437	0	0	0	0.560369	-0.30966	0.0613472	-4.02686	0.0165025	0.897786	0.999816	species_specific
17:28122602-28172618	0	0.368437	0	0	0	0.560369	-0.30966	0.0613472	-4.02686	0.0165025	0.897786	0.999816	MMU_CIRCpedia_29958
14:77576766-77579109	0	0	0.49071	0.525638	0	0	0.311986	0.0640749	-3.9641	0.0164705	0.897885	0.999816	MMU_CIRCpedia_32798
5:112234633-112240810	0	0	0.49071	0.525638	0	0	0.311986	0.0640749	-3.9641	0.0164705	0.897885	0.999816	MMU_CIRCpedia_17017
1:21721035-21721764	0.702381	0.429844	0.420608	0.459934	0.784511	0.498106	0.175711	0.121842	-3.03691	0.0162089	0.898695	0.999816	species_specific
10:50433475-50519921	0	0.429844	0	0	0.392256	0	0.291978	0.0593643	-4.07426	0.0161687	0.89882	0.999816	MMU_CIRCpedia_16445
12:26055278-26067713	0.983333	0	0	0.394229	0.392256	0.311316	0.238301	0.0918806	-3.4441	0.0160879	0.899072	0.999816	species_specific
12:350620-356537	0.983333	0	0	0.722753	0.784511	0	-0.211361	0.101363	-3.3024	0.0160521	0.899183	0.999816	MMU_CIRCpedia_37186
12:411746-438554	0	0	0.420608	0	0	0.435843	0.303217	0.0604974	-4.04698	0.015948	0.899509	0.999816	species_specific
9:137716625-137758011	0	0	0.420608	0	0	0.435843	0.303217	0.0604974	-4.04698	0.015948	0.899509	0.999816	species_specific
1:180984676-181005463	0.35119	0.552656	0	0	0	0.933949	0.255693	0.0844116	-3.56642	0.0159436	0.899523	0.999816	MMU_CIRCpedia_10563
10:68644697-68647005	0.421429	0	0	0.459934	0	0	0.304398	0.0608581	-4.03841	0.0159098	0.899629	0.999816	MMU_CIRCpedia_224132
20:35863012-35871829	0.421429	0	0	0.459934	0	0	0.304398	0.0608581	-4.03841	0.0159098	0.899629	0.999816	MMU_CIRCpedia_10729
6:57124733-57128840	0.421429	0	0	0.459934	0	0	0.304398	0.0608581	-4.03841	0.0159098	0.899629	0.999816	species_specific
1:77711746-77715868	0	0.552656	0	0.525638	0	0.311316	-0.290564	0.0719448	-3.79697	0.0156777	0.90036	0.999816	species_specific
1:62803718-62821209	0	0.245625	0	0	0	0.37358	-0.282444	0.0539079	-4.21336	0.0156713	0.90038	0.999816	MMU_CIRCpedia_229542
15:50586391-50592626	0	0.245625	0	0	0	0.37358	-0.282444	0.0539079	-4.21336	0.0156713	0.90038	0.999816	MMU_CIRCpedia_6692
17:29451454-29482288	0	0.245625	0	0	0	0.37358	-0.282444	0.0539079	-4.21336	0.0156713	0.90038	0.999816	MMU_CIRCpedia_29726
19:48230437-48241063	0	0.245625	0	0	0	0.37358	-0.282444	0.0539079	-4.21336	0.0156713	0.90038	0.999816	species_specific
3:32733422-32737490	0	0.245625	0	0	0	0.37358	-0.282444	0.0539079	-4.21336	0.0156713	0.90038	0.999816	MMU_CIRCpedia_213533
X:119629317-119629508	0	0.245625	0	0	0	0.37358	-0.282444	0.0539079	-4.21336	0.0156713	0.90038	0.999816	species_specific
9:33960825-33963791	0	0.429844	0	0	0.261504	0.37358	-0.304517	0.0648313	-3.94717	0.0156578	0.900423	0.999816	species_specific
9:133412298-133412921	1.19405	0	0.630913	0.854162	1.24214	0.498106	-0.131287	0.150427	-2.73286	0.0155506	0.900762	0.999816	species_specific
11:117279907-117280259	1.54524	2.14922	1.82264	1.18269	2.28816	3.23769	0.0514111	0.343079	-1.54339	0.0155075	0.900899	0.999816	species_specific
1:193138084-193142066	0.632143	0.307031	0.420608	0.591343	0.32688	0.622633	0.186189	0.111515	-3.16469	0.0154618	0.901045	0.999816	species_specific
1:204112914-204114605	1.82619	2.21062	1.82264	2.95672	1.8959	2.86411	-0.0478371	0.373583	-1.4205	0.0151829	0.901937	0.999816	species_specific
11:117244444-117246948	0.632143	1.47375	1.33193	1.51121	1.43827	1.183	0.0734575	0.22624	-2.14408	0.014945	0.902704	0.999816	species_specific
11:89400016-89402542	0	0.675469	0.701014	0.985572	0	0.560369	0.182422	0.110288	-3.18065	0.0147498	0.903339	0.999816	species_specific
1:51405904-51408332	0.35119	0	0	0	0	0.37358	0.281477	0.057277	-4.1259	0.0145396	0.904027	0.999816	species_specific
17:48112030-48112660	0.35119	0	0	0	0	0.37358	0.281477	0.057277	-4.1259	0.0145396	0.904027	0.999816	species_specific
17:60623520-60633977	0.491667	0.49125	0.350507	0.262819	0.588383	0.622633	0.182868	0.109251	-3.19428	0.0144249	0.904404	0.999816	MMU_CIRCpedia_32034
18:47865058-47896809	0.913095	1.16672	0.771115	1.44551	0.849887	1.12074	0.0871627	0.193869	-2.36684	0.0144112	0.904449	0.999816	MMU_CIRCpedia_37007
18:76849525-76881512	0.702381	0.859687	0	0	0.719135	0.996212	0.165711	0.120692	-3.05059	0.0143482	0.904657	0.999816	MMU_CIRCpedia_31086
8:17653185-17656065	0	0	0.841217	0	0.523007	0.37358	0.248336	0.0832613	-3.58621	0.0143148	0.904768	0.999816	species_specific
12:6073618-6075551	0	0.368437	0.771115	0.657048	0.588383	0	0.206249	0.0983561	-3.34584	0.0142737	0.904904	0.999816	species_specific
18:20982762-20984535	0	0.429844	0.49071	1.11698	0.261504	0	-0.216402	0.094443	-3.40441	0.0141863	0.905194	0.999816	species_specific
4:51863436-51891851	0	0.429844	0.280406	0	0.653759	0.37358	-0.249454	0.0818383	-3.61108	0.0140018	0.905809	0.999816	MMU_CIRCpedia_28456
20:47246007-47249439	0	0.552656	0	0	0	0.809422	-0.274067	0.0717408	-3.80106	0.0139045	0.906136	0.999816	species_specific
16:89733481-89737905	0.35119	0	0.49071	0	0.653759	0.249053	0.241768	0.0836946	-3.57872	0.0136992	0.906828	0.999816	MMU_CIRCpedia_38074
11:120476660-120477526	0	0.614062	0.630913	0	0.980639	0.747159	-0.173636	0.112572	-3.15107	0.0136873	0.906869	0.999816	species_specific
19:41248513-41248820	1.89643	0.9825	0.701014	2.23396	1.6344	0.933949	-0.0644343	0.247206	-2.01622	0.0136117	0.907125	0.999816	MMU_CIRCpedia_14632
13:79341122-79344794	0	0	0.420608	0.459934	0	0	0.278776	0.0606722	-4.04282	0.0134388	0.907714	0.999816	MMU_CIRCpedia_228769
4:105424195-105456745	0.491667	0.552656	0	0.459934	0.653759	0	0.212569	0.0927138	-3.43107	0.0133345	0.908071	0.999816	MMU_CIRCpedia_7962
16:2262277-2263287	0	0.368437	0	0	0.523007	0	-0.277615	0.0608844	-4.03778	0.0130971	0.90889	0.999816	species_specific
2:152662602-152669270	0	0.368437	0	0	0.523007	0	-0.277615	0.0608844	-4.03778	0.0130971	0.90889	0.999816	species_specific
5:6737509-6746427	0	0.368437	0	0	0.523007	0	-0.277615	0.0608844	-4.03778	0.0130971	0.90889	0.999816	MMU_CIRCpedia_27189
11:110136662-110159490	0	0	0.350507	0.262819	0	0.311316	-0.272496	0.0615456	-4.0222	0.0129871	0.909271	0.999816	species_specific
1:94220257-94231643	0.421429	0	0	0.328524	0	0.37358	-0.273835	0.0665629	-3.90914	0.012926	0.909484	0.999816	species_specific
3:171157459-171194635	0	0	0.49071	0	0.261504	0.249053	0.275813	0.0643654	-3.95757	0.012871	0.909676	0.999816	MMU_CIRCpedia_15226
4:38931450-38935790	0	1.47375	0.560811	0.394229	0.588383	1.30753	0.124683	0.144579	-2.79007	0.0128008	0.909922	0.999816	species_specific
17:80048582-80050283	0	0.49125	0.630913	0	0.457631	0.747159	0.197015	0.0970547	-3.36506	0.0126486	0.910457	0.999816	species_specific
3:27379248-27452498	0.280952	0.245625	0	0	0	0.809422	-0.257881	0.0716996	-3.80189	0.0123804	0.911407	0.999816	species_specific
18:9524593-9525851	0	0	1.12162	1.70832	0	0	-0.171011	0.107854	-3.21285	0.012264	0.911823	0.999816	MMU_CIRCpedia_26328
6:144827610-144835938	0	0	0.280406	0.459934	0	0	-0.249087	0.0568172	-4.13753	0.012041	0.912625	0.999816	species_specific
8:28713456-28718207	0.35119	0	0	0.591343	0	0	-0.262511	0.0618259	-4.01565	0.0120235	0.912688	0.999816	MMU_CIRCpedia_26053
3:27418485-27452498	0.421429	0	0.420608	0.591343	0	0.37358	0.224353	0.0840983	-3.57178	0.0118888	0.913177	0.999816	MMU_CIRCpedia_36850
19:45831383-45831588	0.421429	0	0	0	0	0.684896	-0.261469	0.0664359	-3.91189	0.0117842	0.913558	0.999816	species_specific
8:27294079-27294310	1.54524	5.03531	3.43497	5.32209	3.13804	3.98485	0.0313367	0.588723	-0.764339	0.0117519	0.913676	0.999816	species_specific
10:68761006-68773099	0	0.368437	0.350507	0	0.719135	0	0.240081	0.0752119	-3.7329	0.0115872	0.914281	0.999816	MMU_CIRCpedia_225604
16:11896557-11898035	0	0	0.701014	1.11698	0	0	-0.222025	0.0830369	-3.5901	0.0115295	0.914493	0.999816	species_specific
11:62535944-62536567	1.68571	1.53516	1.96284	3.28524	1.6344	1.93016	-0.0443943	0.336413	-1.5717	0.011194	0.915742	0.999816	species_specific
13:49705620-49706372	0.421429	0.921094	0	0.591343	0.457631	0.809422	-0.149798	0.116741	-3.09862	0.0109291	0.916742	0.999816	species_specific
2:70224553-70230854	0	0.675469	0.771115	0.591343	0	1.05848	0.150392	0.114906	-3.12147	0.010801	0.917229	0.999816	species_specific
22:24302194-24369320	0.561905	0.49125	0.841217	0.657048	1.24214	0.311316	0.115469	0.142225	-2.81375	0.0101617	0.919708	0.999816	MMU_CIRCpedia_29011
10:27039964-27043567	0.491667	0	0	0.525638	0.261504	0	-0.235605	0.0705468	-3.82528	0.0101578	0.919723	0.999816	species_specific
11:62638982-62639731	0	0.245625	0	0	0	0.249053	0.209998	0.0510371	-4.29231	0.0101389	0.919797	0.999816	species_specific
19:11724193-11725327	0	0.245625	0	0	0	0.249053	0.209998	0.0510371	-4.29231	0.0101389	0.919797	0.999816	species_specific
21:36344578-36349408	0	0.245625	0	0	0	0.249053	0.209998	0.0510371	-4.29231	0.0101389	0.919797	0.999816	species_specific
9:121152484-121160302	0	0.245625	0	0	0	0.249053	0.209998	0.0510371	-4.29231	0.0101389	0.919797	0.999816	MMU_CIRCpedia_17642
1:179117331-179118764	0	0	0.350507	0.394229	0	0	0.233959	0.0572738	-4.12598	0.0100958	0.919968	0.999816	species_specific
12:116928022-116964854	0.421429	0.245625	0	0	0.392256	0.311316	0.228749	0.0735464	-3.7652	0.0100902	0.919989	0.999816	species_specific
12:5799506-5854141	0	0.307031	0	0.459934	0	0	-0.233565	0.0570886	-4.13065	0.0100729	0.920058	0.999816	species_specific
13:98883812-98885092	0.280952	0	0	0.459934	0	0	-0.226611	0.0569376	-4.13448	0.0100169	0.92028	0.999816	species_specific
6:130955104-130956499	3.09048	2.02641	1.89274	3.02242	3.07267	2.61506	0.0351502	0.431721	-1.21183	0.00993881	0.92059	0.999816	MMU_CIRCpedia_14533
12:27368261-27380404	0.491667	0	0	0	0.523007	0	0.242687	0.0650827	-3.94158	0.0099202	0.920664	0.999816	species_specific
12:30728647-30751133	0.491667	0	0	0	0.523007	0	0.242687	0.0650827	-3.94158	0.0099202	0.920664	0.999816	MMU_CIRCpedia_229771
6:42603587-42606651	0.491667	1.28953	0.98142	1.3798	1.30752	0.622633	0.0745482	0.188946	-2.40396	0.00990882	0.920709	0.999816	MMU_CIRCpedia_227103
7:148832633-148847305	0	0	0.630913	0.722753	0	0	0.229176	0.0723525	-3.78881	0.00975207	0.921337	0.999816	MMU_CIRCpedia_222593
2:202464808-202467689	0.702381	2.02641	1.96284	2.43108	2.02665	1.68111	-0.0442693	0.305311	-1.71165	0.00960053	0.921949	0.999816	MMU_CIRCpedia_24678
21:26021839-26022042	0	0.307031	0.420608	0.525638	0.261504	0	0.216511	0.0763177	-3.71184	0.00955624	0.922128	0.999816	species_specific
18:21765771-21819646	0	1.16672	0	0.854162	0.392256	0	0.16897	0.0970046	-3.3658	0.00955501	0.922133	0.999816	MMU_CIRCpedia_2082
1:92605306-92607727	0	0.429844	0	0	0.588383	0	-0.238756	0.0640162	-3.96542	0.0094945	0.922379	0.999816	MMU_CIRCpedia_2180
9:14120439-14125766	0	0.429844	0	0	0.588383	0	-0.238756	0.0640162	-3.96542	0.0094945	0.922379	0.999816	NA
3:63898398-63952483	0	0	0.630913	0	0.32688	0.622633	-0.209898	0.0784258	-3.67253	0.0093564	0.922944	0.999816	species_specific
17:59197543-59197789	0.280952	0	0	0	0	0.311316	0.217183	0.0538765	-4.2142	0.00902846	0.924303	0.999816	MMU_CIRCpedia_32730
8:17649845-17654666	0.35119	0.429844	0	0.459934	0.653759	0	-0.190976	0.0855625	-3.54688	0.00899651	0.924436	0.999816	species_specific
11:33591236-33618662	0	0.368437	0	0	0	0.37358	0.210686	0.0570673	-4.13119	0.00890184	0.924834	0.999816	MMU_CIRCpedia_1132
15:72045723-72046634	0	0.368437	0	0	0	0.37358	0.210686	0.0570673	-4.13119	0.00890184	0.924834	0.999816	MMU_CIRCpedia_214036
4:51863436-51886638	0	0.368437	0	0	0	0.37358	0.210686	0.0570673	-4.13119	0.00890184	0.924834	0.999816	MMU_CIRCpedia_28455
5:37243012-37247745	0	0.368437	0	0	0	0.37358	0.210686	0.0570673	-4.13119	0.00890184	0.924834	0.999816	species_specific
3:114350273-114351878	1.12381	0.798281	0	1.11698	0.523007	0.996212	-0.0969332	0.150946	-2.7279	0.00864501	0.925923	0.999816	MMU_CIRCpedia_20128
14:63998913-64000719	0.421429	0.245625	0	0	0.588383	0.37358	-0.198776	0.0796383	-3.65039	0.00853256	0.926405	0.999816	species_specific
3:160413472-160414517	0.491667	0.429844	0.630913	0	0.849887	0.933949	0.125184	0.12308	-3.02233	0.00838636	0.927036	0.999816	species_specific
1:245915529-245929937	0	0.245625	0	0.262819	0	0	0.189626	0.0511324	-4.28962	0.00836522	0.927128	0.999816	MMU_CIRCpedia_12190
16:53228982-53243016	0	0.245625	0	0.262819	0	0	0.189626	0.0511324	-4.28962	0.00836522	0.927128	0.999816	MMU_CIRCpedia_33908
3:27383152-27424152	0	0.245625	0	0.262819	0	0	0.189626	0.0511324	-4.28962	0.00836522	0.927128	0.999816	MMU_CIRCpedia_9776
2:218656149-218656463	0	0.675469	0	0	0	0.933949	-0.198964	0.077705	-3.68585	0.00821204	0.927796	0.999816	MMU_CIRCpedia_28791
1:65364634-65366196	0	0.429844	0	0	0	0.435843	0.209622	0.0600738	-4.05712	0.0081947	0.927873	0.999816	MMU_CIRCpedia_534
12:132734384-132737065	0.280952	0	0	0	0	0.435843	-0.202281	0.0567655	-4.13884	0.00809558	0.928309	0.999816	MMU_CIRCpedia_40611
3:17009673-17014911	0	0.614062	0	0	0.457631	0.37358	-0.204415	0.0741875	-3.75268	0.00802159	0.928636	0.999816	MMU_CIRCpedia_21887
13:40559508-40560860	0	0	0.49071	0	0.719135	0	-0.21033	0.0695549	-3.8457	0.00791991	0.929089	0.999816	MMU_CIRCpedia_22364
10:94493364-94500327	0	0.49125	0	0	0	0.498106	0.209175	0.0630753	-3.98678	0.00782905	0.929496	0.999816	MMU_CIRCpedia_18986
8:132622610-132661627	0	0.49125	0	0	0	0.498106	0.209175	0.0630753	-3.98678	0.00782905	0.929496	0.999816	species_specific
7:149153944-149154340	0	1.59656	0.560811	1.3798	0.849887	0.622633	-0.0843062	0.159847	-2.64524	0.00777957	0.929718	0.999816	MMU_CIRCpedia_216488
12:122327946-122333143	0.561905	0.736875	0	0.525638	0.392256	0.871686	-0.128469	0.114464	-3.12703	0.0077596	0.929808	0.999816	species_specific
5:98879551-98881375	0.983333	0.9825	0.771115	0.657048	0.849887	2.11695	-0.0628178	0.196414	-2.34803	0.00773274	0.92993	0.999816	species_specific
20:49269941-49271750	0	0.552656	0	0	0	0.560369	0.209309	0.0660724	-3.91981	0.0077306	0.929939	0.999816	MMU_CIRCpedia_226239
9:121161855-121162271	0.421429	0	0	0	0.457631	0	0.211494	0.0615372	-4.0224	0.00760756	0.930498	0.999816	species_specific
15:63674341-63689699	0.421429	0	0.280406	0	0.653759	0.37358	-0.177673	0.0826606	-3.59666	0.0072905	0.931958	0.999816	species_specific
7:8218304-8235940	0.280952	0	0	0.328524	0	0	0.195151	0.0539982	-4.21095	0.00728001	0.932007	0.999816	species_specific
8:67105904-67116122	0.280952	0	0	0.328524	0	0	0.195151	0.0539982	-4.21095	0.00728001	0.932007	0.999816	species_specific
3:71041327-71053773	0	0.429844	0.701014	0.657048	0.32688	0.311316	0.146147	0.0988575	-3.33851	0.00727738	0.932019	0.999816	MMU_CIRCpedia_35992
1:200043773-200120955	0.421429	0.859687	0	0.591343	0.588383	0.560369	-0.126182	0.112632	-3.15031	0.00723941	0.932196	0.999816	species_specific
2:223894233-223895630	0.842857	0	0.911318	1.18269	0.653759	0.622633	-0.0950108	0.144292	-2.79293	0.00722407	0.932268	0.999816	species_specific
14:74549862-74555693	0	0.736875	0	0.459934	0	0.560369	-0.180685	0.080865	-3.62834	0.0072079	0.932343	0.999816	MMU_CIRCpedia_38099
2:26127143-26127951	0	0.307031	0.280406	0	0.392256	0.435843	-0.192499	0.0739033	-3.75822	0.00714207	0.932652	0.999816	MMU_CIRCpedia_16541
13:79358273-79378907	0	0.368437	0	0.394229	0	0	0.187321	0.0572137	-4.1275	0.00707878	0.932951	0.999816	species_specific
2:206127796-206149925	0	0.368437	0	0.394229	0	0	0.187321	0.0572137	-4.1275	0.00707878	0.932951	0.999816	species_specific
4:76124648-76144473	0	0.368437	0	0.394229	0	0	0.187321	0.0572137	-4.1275	0.00707878	0.932951	0.999816	species_specific
6:112185236-112189205	0	0.368437	0	0.394229	0	0	0.187321	0.0572137	-4.1275	0.00707878	0.932951	0.999816	species_specific
6:143772257-143774215	0	0.368437	0	0.394229	0	0	0.187321	0.0572137	-4.1275	0.00707878	0.932951	0.999816	species_specific
8:18867673-18872733	0	0.368437	0	0.394229	0	0	0.187321	0.0572137	-4.1275	0.00707878	0.932951	0.999816	MMU_CIRCpedia_26908
9:129902868-129908999	0	0.368437	0	0.394229	0	0	0.187321	0.0572137	-4.1275	0.00707878	0.932951	0.999816	species_specific
1:99662318-99667766	1.61548	3.00891	2.17314	3.87658	2.48428	2.11695	0.029919	0.414872	-1.26926	0.00693148	0.93365	0.999816	MMU_CIRCpedia_4179
4:147864845-147881932	0	0.49125	0.49071	0.394229	0.32688	0.37358	0.157339	0.0902016	-3.4707	0.00693081	0.933654	0.999816	MMU_CIRCpedia_29663
16:67610823-67612121	1.12381	1.59656	0.701014	1.70832	1.04601	1.74337	-0.0483581	0.23321	-2.1003	0.00686005	0.933992	0.999816	species_specific
7:24623665-24650712	0	0.552656	0	0.788458	0	0	-0.194533	0.070631	-3.82356	0.0068214	0.934178	0.999816	MMU_CIRCpedia_21747
20:17952586-17954117	0	0.675469	0	0.722753	0	0	0.186572	0.0723358	-3.78915	0.00678607	0.934348	0.999816	MMU_CIRCpedia_9467
8:124585086-124591235	0.35119	0.552656	0.350507	0.657048	0	0.809422	0.129297	0.105771	-3.24099	0.00672061	0.934665	0.999816	MMU_CIRCpedia_24332
17:63764015-63766194	0	0.245625	0.280406	0.788458	0	0	-0.19153	0.0704527	-3.8272	0.00667868	0.934869	0.999816	species_specific
3:65429519-65442849	0.913095	0.675469	0.350507	0.657048	0.784511	0.871686	0.0896135	0.14501	-2.78577	0.00650818	0.935704	0.999816	species_specific
17:18867281-18877870	0	0.429844	0	0.459934	0	0	0.185118	0.0602464	-4.05298	0.00641147	0.936182	0.999816	species_specific
6:10702368-10702639	0	0.429844	0	0.459934	0	0	0.185118	0.0602464	-4.05298	0.00641147	0.936182	0.999816	MMU_CIRCpedia_225713
1:31005852-31007102	0	0.614062	0.420608	0.788458	0.392256	0.249053	-0.137719	0.0987587	-3.33995	0.00639065	0.936286	0.999816	MMU_CIRCpedia_7562
6:148468544-148487715	0	0.614062	0.560811	1.3798	0	0	0.133233	0.100717	-3.31162	0.00638538	0.936312	0.999816	MMU_CIRCpedia_32929
4:87195323-87195690	1.19405	0.49125	0	1.3141	0.719135	0	0.101827	0.131548	-2.92634	0.00637186	0.936379	0.999816	species_specific
6:116645713-116660846	0	0.736875	0.420608	0	0.849887	0.684896	-0.126176	0.105333	-3.24696	0.00625751	0.936951	0.999816	species_specific
2:109585125-109593119	0	0.245625	0.280406	0.591343	0	0	0.190203	0.0660934	-3.91935	0.00620686	0.937207	0.999816	species_specific
12:26064497-26067713	0.35119	0	0.420608	0	0.32688	0.560369	0.167991	0.0810811	-3.62449	0.00619769	0.937253	0.999816	species_specific
2:44201185-44209327	0	0.552656	0	0.591343	0	0	0.183537	0.0662986	-3.91488	0.00596832	0.938423	0.999816	species_specific
18:9583116-9595102	0.842857	0.49125	0	0.854162	0.980639	0	-0.110133	0.117558	-3.08856	0.00595309	0.938501	0.999816	species_specific
7:107929063-107932377	0.280952	0.49125	0	0.525638	0.32688	0	0.165109	0.0788654	-3.66446	0.00591913	0.938676	0.999816	species_specific
1:92333390-92380873	0	0.552656	0	0.394229	0	0.37358	-0.181289	0.0704784	-3.82667	0.00591385	0.938704	0.999816	species_specific
1:180397515-180430262	0	0.614062	0	0	0.261504	0.560369	-0.175051	0.0738117	-3.76001	0.00584196	0.939077	0.999816	MMU_CIRCpedia_10620
1:155675009-155679512	1.54524	1.04391	0.49071	0.919867	1.43827	1.68111	-0.0482734	0.216126	-2.21006	0.00576246	0.939492	0.999816	species_specific
5:168488601-168497348	0	0	0.280406	0.328524	0	0	0.172747	0.0538801	-4.2141	0.00574785	0.939568	0.999816	species_specific
3:3156218-3174261	0	0.368437	0	0.525638	0	0	-0.181437	0.0601198	-4.05602	0.00568985	0.939874	0.999816	species_specific
4:82427432-82428446	0	0.368437	0	0.525638	0	0	-0.181437	0.0601198	-4.05602	0.00568985	0.939874	0.999816	NA
9:100498764-100516771	1.33452	2.64047	1.61233	3.28524	1.56902	2.11695	0.0307399	0.346828	-1.52771	0.00568514	0.939898	0.999816	MMU_CIRCpedia_21368
1:160323430-160332557	0.561905	0	0.911318	0.788458	0.32688	0.684896	0.1053	0.121192	-3.04464	0.00565169	0.940075	0.999816	MMU_CIRCpedia_11842
19:43497117-43497876	0	0.675469	0	0	0.261504	0.435843	0.166451	0.0725535	-3.78481	0.005448	0.941163	0.999816	species_specific
5:65451474-65473952	0	0	0.420608	0.394229	0	0.249053	-0.17615	0.0649629	-3.94424	0.00539167	0.941467	0.999816	MMU_CIRCpedia_1172
16:4261778-4262701	1.19405	0.614062	0.420608	0.985572	1.24214	0.747159	-0.0641226	0.168718	-2.56731	0.00528447	0.942051	0.999816	species_specific
2:71426459-71427414	0.421429	0.614062	0.560811	0.394229	1.17677	0.560369	-0.0925088	0.131709	-2.92457	0.00527168	0.942121	0.999816	MMU_CIRCpedia_218949
12:122577671-122580670	0.632143	0	0	0	0	0.747159	0.165088	0.0737987	-3.76026	0.00514595	0.942814	0.999816	species_specific
X:47846104-47895940	0	0	0.630913	0.262819	0.457631	0	0.16517	0.0730566	-3.77484	0.0051376	0.942861	0.999816	species_specific
3:196391812-196393619	0.702381	1.53516	0.911318	1.83973	0.915263	1.12074	0.0463568	0.21124	-2.24304	0.0051003	0.943068	0.999816	MMU_CIRCpedia_16503
16:69653235-69653428	0	0.552656	0	0	0	0.747159	-0.167936	0.070326	-3.8298	0.00506562	0.943262	0.999816	species_specific
15:42872610-42878684	0	0.552656	0.49071	0	0.719135	0.435843	0.128678	0.0938254	-3.41388	0.00503542	0.943431	0.999816	MMU_CIRCpedia_5223
2:24270670-24271941	0	1.53516	0.420608	1.11698	0.392256	1.05848	-0.0764952	0.147656	-2.75969	0.00501059	0.94357	0.999816	species_specific
14:92007639-92011072	0	0.368437	0	0.262819	0	0.249053	-0.168818	0.0600212	-4.05838	0.00493552	0.943994	0.999816	species_specific
6:85557975-85565419	0	0.368437	0	0.262819	0	0.249053	-0.168818	0.0600212	-4.05838	0.00493552	0.943994	0.999816	species_specific
15:64118116-64118854	0	0.245625	0	0	0.32688	0	-0.162968	0.0530564	-4.23633	0.0048797	0.944311	0.999816	species_specific
5:143054438-143057747	0	0.245625	0	0	0.32688	0	-0.162968	0.0530564	-4.23633	0.0048797	0.944311	0.999816	MMU_CIRCpedia_19093
6:112253955-112254291	0	0.245625	0	0	0.32688	0	-0.162968	0.0530564	-4.23633	0.0048797	0.944311	0.999816	species_specific
1:179118586-179121867	0	0.736875	0	0	0.392256	0.37358	0.151067	0.0757951	-3.72175	0.00478045	0.944879	0.999816	species_specific
19:45280373-45280734	0.632143	1.35094	0.420608	1.18269	0.849887	1.12074	-0.0568965	0.174736	-2.51675	0.00460184	0.945917	0.999816	species_specific
10:110964124-110985765	0.491667	0.552656	0	0	0.653759	0.747159	-0.115219	0.0995987	-3.32773	0.00456736	0.94612	0.999816	MMU_CIRCpedia_22788
7:152330600-152358675	0.421429	0.675469	0.280406	0.657048	0.457631	0.747159	-0.0952578	0.118352	-3.07885	0.00452905	0.946346	0.999816	MMU_CIRCpedia_14515
7:18666212-18666476	1.19405	0	0	0.459934	0.719135	0.498106	-0.0970963	0.111432	-3.16577	0.00424814	0.948034	0.999816	MMU_CIRCpedia_17263
10:63176296-63177856	0	0.368437	0	0	0	0.498106	-0.156124	0.0599226	-4.06076	0.00422917	0.94815	0.999816	species_specific
5:154871729-154872651	0	0	0.49071	0.591343	0	0	0.157941	0.0655393	-3.93149	0.00416061	0.948571	0.999816	species_specific
6:36894503-36914693	0.421429	0	0	0	0	0.498106	0.157533	0.0621248	-4.00869	0.00411581	0.948849	0.999816	species_specific
7:90726566-90726812	0.491667	0	0.49071	0.459934	0.915263	0	-0.10964	0.0984214	-3.34488	0.0040368	0.949341	0.999816	MMU_CIRCpedia_22393
8:29045360-29049048	0.280952	0.368437	0.420608	0.657048	0	0.622633	0.111938	0.0967563	-3.3695	0.00401816	0.949458	0.999816	MMU_CIRCpedia_25939
1:186341027-186344090	0	0	0.280406	0	0.392256	0	-0.142163	0.0559169	-4.16057	0.00393149	0.950006	0.999816	species_specific
13:79341122-79378907	0	0	0.280406	0	0.392256	0	-0.142163	0.0559169	-4.16057	0.00393149	0.950006	0.999816	species_specific
2:112299848-112325197	0	0	0.280406	0	0.392256	0	-0.142163	0.0559169	-4.16057	0.00393149	0.950006	0.999816	species_specific
15:65497863-65500779	0	0	0.350507	0	0.392256	0	0.145273	0.0578464	-4.11163	0.00388005	0.950333	0.999816	species_specific
9:120518426-120539164	0.280952	0.552656	0	0.394229	0	0.560369	0.126544	0.0825902	-3.59789	0.00375039	0.951169	0.999816	MMU_CIRCpedia_216982
12:1027747-1028572	0.632143	0.736875	0.98142	1.3141	0.653759	0.933949	0.053361	0.169018	-2.56475	0.00367112	0.951687	0.999816	MMU_CIRCpedia_4952
X:16828093-16829770	0	0	0.420608	0	0.588383	0	-0.145757	0.0644822	-3.95496	0.00363335	0.951936	0.999816	species_specific
19:34430575-34434968	0	1.965	1.26183	1.83973	0	2.366	-0.0383279	0.218095	-2.19697	0.00359566	0.952209	0.999816	species_specific
12:124372021-124378384	0.421429	0.245625	0.630913	0.394229	0.784511	0.37358	0.089324	0.110683	-3.1755	0.00349459	0.952862	0.999816	species_specific
9:87698655-87700237	0	0.798281	0	0.722753	0.32688	0	-0.119518	0.0831777	-3.58766	0.00326657	0.954424	0.999816	species_specific
11:95812931-95813589	0	0	0.560811	0	0	0.809422	-0.128886	0.0729845	-3.77627	0.00323104	0.954672	0.999816	species_specific
5:14290715-14316743	0	0.245625	0	0	0.261504	0	0.112183	0.0515	-4.27928	0.00320577	0.95485	0.999816	species_specific
19:45368629-45369147	0.421429	0	0	0	0	0.622633	-0.134795	0.0650012	-3.94339	0.00320446	0.954859	0.999816	MMU_CIRCpedia_212849
6:144487547-144493456	2.17738	0.859687	0.420608	1.51121	1.69977	1.30753	-0.0322756	0.238484	-2.06803	0.003193	0.95494	0.999816	species_specific
8:37765525-37766355	0.632143	0.429844	0.98142	1.05128	1.04601	0.622633	-0.0545852	0.157657	-2.66514	0.00313882	0.955323	0.999816	MMU_CIRCpedia_14875
5:146254942-146258593	0.491667	0.429844	0	1.11698	0	0	0.107914	0.0885061	-3.49808	0.00311867	0.955467	0.999816	MMU_CIRCpedia_19847
21:46381693-46385983	0.772619	0	0	0.591343	0	0.37358	0.118327	0.0823086	-3.60281	0.00311302	0.955507	0.999816	species_specific
15:92924320-92929091	1.33452	1.28953	0.630913	1.11698	1.04601	1.8679	0.0347902	0.219506	-2.18767	0.00311276	0.955509	0.999816	MMU_CIRCpedia_28460
13:77205255-77243951	0	0.552656	0.280406	0	0.588383	0.498106	-0.109786	0.0862852	-3.53474	0.00300592	0.956278	0.999816	species_specific
6:149533457-149541586	0	0	0.630913	0.394229	0	0.37358	0.125089	0.073656	-3.76305	0.0029482	0.9567	0.999816	species_specific
10:74394140-74398579	0.491667	0.614062	0.420608	0.459934	0.980639	0.37358	0.0739158	0.122346	-3.03096	0.00291875	0.956916	0.999816	MMU_CIRCpedia_13178
14:49795790-49800696	0	0	0.420608	0	0	0.498106	0.131978	0.0619378	-4.01304	0.0028945	0.957095	0.999816	species_specific
14:75109684-75121174	0.280952	0	0	0	0.392256	0	-0.119709	0.056037	-4.15748	0.0028202	0.957649	0.999816	species_specific
2:32478634-32482582	0.280952	0	0	0	0.392256	0	-0.119709	0.056037	-4.15748	0.0028202	0.957649	0.999816	MMU_CIRCpedia_28812
3:134175608-134195182	0.280952	0	0	0	0.392256	0	-0.119709	0.056037	-4.15748	0.0028202	0.957649	0.999816	MMU_CIRCpedia_794
6:159682473-159688242	0.280952	0	0	0	0.392256	0	-0.119709	0.056037	-4.15748	0.0028202	0.957649	0.999816	species_specific
1:161846448-161863312	0.983333	0	0	0	0.392256	0.809422	0.0971952	0.0945709	-3.40246	0.00279495	0.957839	0.999816	MMU_CIRCpedia_38298
16:24750725-24777358	0.561905	0	0	0	0.653759	0	0.125074	0.0702025	-3.83233	0.00278619	0.957905	0.999816	MMU_CIRCpedia_5990
1:93324634-93325895	0	0.307031	0	0	0.392256	0	-0.126494	0.0561964	-4.15338	0.00277382	0.957998	0.999816	species_specific
3:168036835-168041474	0.772619	1.04391	0.560811	0.788458	1.24214	0.871686	0.042618	0.170033	-2.55611	0.00241625	0.960797	0.999816	species_specific
14:88574692-88578140	0.280952	0	0	0	0.32688	0	0.11142	0.0544685	-4.19844	0.00237611	0.961123	0.999816	species_specific
20:41092471-41101353	0.913095	0.614062	0.701014	0.788458	0.653759	1.49432	-0.0429821	0.167193	-2.58042	0.00233569	0.961455	0.999816	MMU_CIRCpedia_220999
20:35716739-35725155	0.280952	0.429844	0	0	0.915263	0	-0.103637	0.079645	-3.65027	0.0022731	0.961975	0.999816	species_specific
11:77624962-77625818	0	0.736875	0.771115	0.591343	0.588383	0.622633	0.0645497	0.120517	-3.05269	0.00218229	0.962741	0.999816	species_specific
15:92996956-93002317	0.842857	1.71937	0.701014	1.11698	1.6344	1.43205	-0.0286527	0.222248	-2.16976	0.0021488	0.963028	0.999816	MMU_CIRCpedia_212112
12:431865-438554	0	0.368437	0	0	0.392256	0	0.0983926	0.0577807	-4.11327	0.00207323	0.963684	0.999816	species_specific
16:16106737-16111582	0	0.368437	0	0	0.392256	0	0.0983926	0.0577807	-4.11327	0.00207323	0.963684	0.999816	species_specific
5:109713519-109729513	0	0.368437	0	0	0.392256	0	0.0983926	0.0577807	-4.11327	0.00207323	0.963684	0.999816	MMU_CIRCpedia_25885
6:7303549-7310029	0.632143	0.9825	0.350507	1.18269	0.784511	0.435843	0.049225	0.146408	-2.77193	0.00205579	0.963837	0.999816	species_specific
[truncated: 109 more rows]
